# Supplementary material for: NHC-catalyzed stereoselective synthesis of spirooxindole lactones from in situ generated oxindole-embedded o-quinone methides and aldehydes
Source: Royal Society of Chemistry journal article supplement (doi:10.1039/d4qo00347k), 2024-01-01
Supplement: d4qo00347k1.pdf [file d4qo00347k1.pdf]

*Supporting Information*

# NHC-Catalyzed Stereoselective Synthesis of Spirooxindole Lactones by *in situ* Generated Oxindole-embedded *o*-Quinone Methides and Aldehydes

Zhengqiang Cao, Fang Hu, Yunpeng Chu, Jiaxue Pei and Xin-Ping Hui\*

*State Key Laboratory of Applied Organic Chemistry, College of Chemistry and Chemical Engineering,  
Lanzhou University, Lanzhou 730000, P. R. China*

\*Corresponding author: Prof. Xin-Ping Hui

E-mail: huixp@lzu.edu.cn

## Contents

|                                                                                              |     |
|----------------------------------------------------------------------------------------------|-----|
| 1. General information.....                                                                  | S1  |
| 2. Preparation of substrates.....                                                            | S1  |
| 3. General procedure.....                                                                    | S2  |
| 4. Scale-up synthesis of product <b>3a</b> .....                                             | S19 |
| 5. Synthetic transformations of product <b>3a</b> .....                                      | S19 |
| 6. Control experiments.....                                                                  | S23 |
| 7. Procedure for the recrystallization of compound <b>3b</b> .....                           | S24 |
| 8. Single crystal XRD data of compound <b>3b</b> .....                                       | S24 |
| 9. References.....                                                                           | S26 |
| 10. NMR Spectra of compounds <b>3a–3v</b> , <b>4a–4o</b> , <b>4q</b> and <b>5a–5d</b> .....  | S27 |
| 11. HPLC Spectra of compounds <b>3a–3v</b> , <b>4a–4o</b> , <b>4q</b> and <b>5a–5d</b> ..... | S78 |

## 1. General Information

All  $^1\text{H}$  NMR and  $^{13}\text{C}$  NMR spectra were recorded on Bruker AVANCE III 400 spectrometer and Bruker AVANCE NEO 600 spectrometer using tetramethylsilane as internal reference, and chemical shifts ( $\delta$ ) and coupling constants ( $J$ ) were expressed in ppm and Hz, respectively.  $^{19}\text{F}$  NMR spectra were collected on Bruker AVANCE III HD 400 spectrometer and Bruker AVANCE NEO 600 spectrometer at room temperature. Optical rotation was measured by the Perkin Elmer 341 polarimeter. The X-ray data was detected by SMART APEX II (Cu- $K\alpha$  radiation,  $\lambda = 1.54184$ ) which was purchased from Bruker. The HRMS analyses were obtained on a Bruker Apex II FT-ICR mass spectrometer with ESI ionization method. The ee value determination was carried out using HPLC with chiral Chirapak column on Agilent 1260 with a UV-detector. Melting points were taken on an X-4 melting point apparatus and were uncorrected. Dichloromethane was freshly distilled from phosphorous pentoxide. THF and toluene were freshly distilled from a deep-blue solution of sodium-benzophenone under nitrogen. PhCl was dried by calcium hydride and freshly distilled under nitrogen atmosphere. DABCO,  $\text{Et}_3\text{N}$  and  $\text{Cs}_2\text{CO}_3$  were purchased from commercial suppliers and used directly. All syntheses and manipulations were carried out under a dry nitrogen atmosphere. Flash column chromatography was carried out utilizing 200–300 mesh silica gel.

*N*-Heterocyclic carbene catalysts **A–F** were synthesized according to the literatures.<sup>[1]</sup>

## 2. Preparation of substrates

### 2.1 General procedure for the preparation of **1**<sup>[2]</sup>

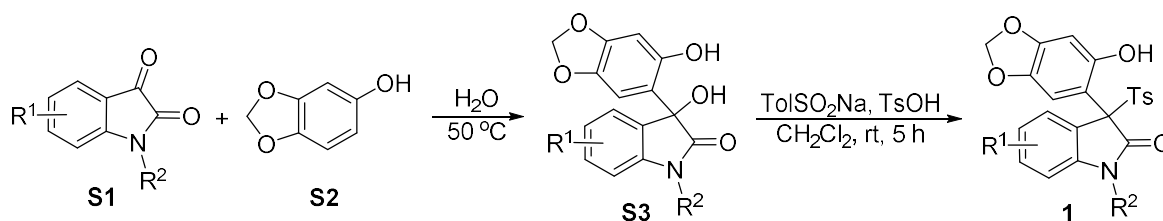

A round-bottom flask was charged with isatin **S1** (12 mmol), phenol **S2** (18 mmol, 1.5 equiv.) and  $\text{H}_2\text{O}$  (50 mL). The reaction mixture was stirred vigorously at  $50\text{ }^\circ\text{C}$  and monitored by TLC. After the consumption of **S1**, the reaction mixture was extracted with ethyl acetate, and the combined organic layers were dried over anhydrous sodium sulfate. The solvent was concentrated in vacuo, and the residue was purified by flash column chromatography (petroleum ether/ethyl acetate = 5/1) to afford product **S3**.

$\text{TolSO}_2\text{Na}$  (1.66 g, 12 mmol, 1.2 equiv.) and  $\text{TsOH}$  (3.10 g, 18 mmol, 1.8 equiv.) were placed in a dried round-bottom flask, dry  $\text{CH}_2\text{Cl}_2$  (30 mL) was added and the mixture was stirred at room temperature for 10 min. Then, a solution of **S3** (10 mmol) in  $\text{CH}_2\text{Cl}_2$  (30 mL) was added and stirred for 5 h. The reaction mixture was quenched and adjusted to  $\text{pH} = 8$  by saturated  $\text{NaHCO}_3$ . After extracted with  $\text{CH}_2\text{Cl}_2$ , the combined organic phases were washed with 1M  $\text{HCl}$  and brine, dried over  $\text{Na}_2\text{SO}_4$ , filtered and concentrated. The crude mixture was filtered by a short silica gel column (hexane/ethyl acetate) to afford **1**.

## 2.2 General procedure for the preparation of $\alpha$ -chloroaldehyde **2**<sup>[3]</sup>

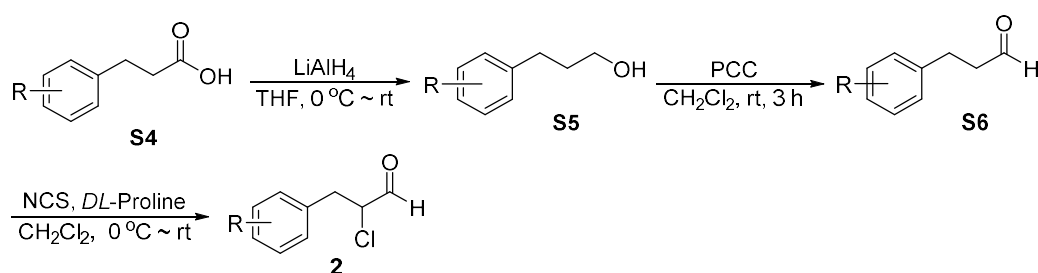

To the stirred solution of saturated acid **S4** (10 mmol) in anhydrous THF (50 mL) at  $0^\circ\text{C}$  was added  $\text{LiAlH}_4$  (30 mmol, 3.0 equiv.) in portions. Then, the solution was warmed to room temperature until completion of the reaction (monitored by TLC). After cooling down in ice-bath, a solution of aqueous saturated ammonium chloride was added carefully until  $\text{H}_2$  evolution ceased. The mixture was extracted with ethyl acetate and washed with brine. The combined organic phases were dried over by anhydrous  $\text{Na}_2\text{SO}_4$ , filtered through celite followed by evaporation under reduced pressure which was used in the next step without further purification.

PCC (Pyridinium chlorochromate, 15 mmol, 1.5 equiv.) was added slowly to the solution of alcohol **S5** (10 mmol) in  $\text{CH}_2\text{Cl}_2$  (50 mL). The reaction was stirred for 3 h at room temperature until full conversion of **S5** (monitored by TLC). Then, the reaction mixture was filtered through celite, washed with  $\text{CH}_2\text{Cl}_2$  and concentrated under reduced pressure to afford the crude product **S6**, which was purified by silica gel flash column chromatography (petroleum ether/ethyl acetate = 10/1) to afford aldehyde.

To a stirred solution of aldehyde **S6** (1.34 g, 10 mmol) in  $\text{CH}_2\text{Cl}_2$  (40 mL) was added *DL*-proline (230.0 mg, 2 mmol, 0.2 equiv.) and NCS (1.33 g, 10 mmol, 1.0 equiv.) at  $0^\circ\text{C}$ . The reaction mixture was stirred at  $0^\circ\text{C}$  for 1 h, and then warmed to rt and stirred for additional 1.5 h. The reaction was quenched by pentane (50 mL) and filtered through a short plug of celite. The organic phase was concentrated under reduced pressure and the residue was subjected to flash column chromatography (petroleum ether/ethyl acetate:15:1) to furnish  $\alpha$ -chloroaldehyde **2** as a colorless oil (1.09 g, 65% yield).

## 3. General procedure

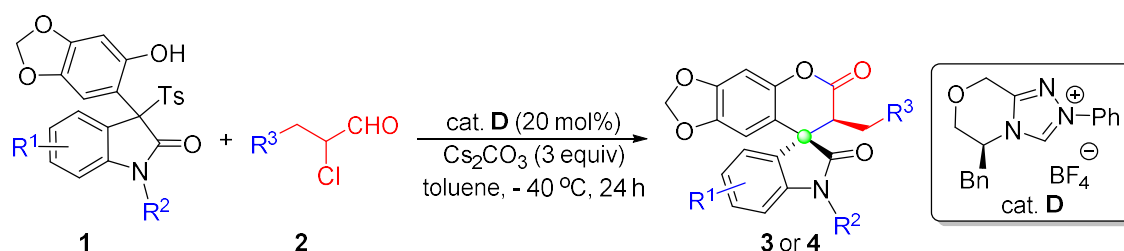

Under argon atmosphere, a flame-dried 25 mL Schlenk tube was charged with **1** (0.1 mmol), **2** (0.25 mmol, 2.5 equiv.),  $\text{Cs}_2\text{CO}_3$  (97.7 mg, 0.3 mmol, 3.0 equiv.) and Cat. **D** (7.6 mg, 0.02 mmol, 20 mol %). The tube was evacuated, filled with argon for 3 times and dry toluene (1.5 mL) was added at  $-40^\circ\text{C}$ . Subsequently, the resulting solution was continuously stirred at  $-40^\circ\text{C}$  for 24 h (monitored by TLC). The reaction mixture

was filtered through silica gels column and the solvent was removed in *vacuo*. The crude residue was purified by column chromatography on silica gel (petroleum ether/ethyl acetate = 7:1 – 3:1) to obtain the products **3** or **4**.

**(3*S*,7'*S*)-1,7'-dibenzylspiro[indoline-3,8'-[1,3]dioxolo[4,5-*g*]chromene]-2,6'(7'*H*)-dione (3a)**

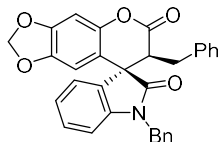

White solid, 38.7 mg, 79% yield, >20:1 dr, 96% ee, m.p. 130.1 – 131.7 °C,  $[\alpha]_D^{18} +127$  (c = 1.00, CH<sub>2</sub>Cl<sub>2</sub>), purified by column chromatography on silica gel (petroleum ether/EtOAc = 5:1). <sup>1</sup>H NMR (400 MHz, CDCl<sub>3</sub>)  $\delta$  7.32 – 7.23 (m, 6H), 7.14 – 7.06 (m, 5H), 6.96 (d, *J* = 6.7 Hz, 2H), 6.86 (d, *J* = 7.9 Hz, 1H), 6.65 (s, 1H), 5.92 (s, 1H), 5.88 (s, 1H), 5.86 (s, 1H), 4.89 (d, *J* = 15.6 Hz, 1H), 4.83 (d, *J* = 15.6 Hz, 1H), 3.39 (dd, *J* = 8.2, 2.6 Hz, 1H), 3.21 (dd, *J* = 13.8, 8.2 Hz, 1H), 2.17 (dd, *J* = 13.9, 2.4 Hz, 1H). <sup>13</sup>C NMR (100 MHz, CDCl<sub>3</sub>)  $\delta$  175.3, 167.9, 148.5, 147.2, 144.3, 144.2, 139.5, 135.4, 129.8, 129.0, 128.9, 128.7, 128.3, 128.2, 128.0, 127.7, 127.5, 126.3, 124.5, 123.8, 115.5, 110.1, 105.7, 101.9, 99.7, 54.6, 48.1, 44.1, 31.5. HRMS (ESI): [M+Na]<sup>+</sup> Calcd. for C<sub>31</sub>H<sub>23</sub>NO<sub>5</sub>Na: 512.1468; Found: 512.1468. HPLC (Chiralpak OD–H column, *n*-hexane/*i*-PrOH = 83/17, flow rate = 1.0 mL/min,  $\lambda$  = 254 nm): *t*<sub>R</sub> = 31.053 min (minor), 35.370 min (major).

**(3*S*,7'*S*)-1,7'-dibenzyl-5-fluorospiro[indoline-3,8'-[1,3]dioxolo[4,5-*g*]chromene]-2,6'(7'*H*)-dione (3b)**

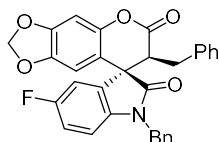

Yellow solid, 46.7 mg, 92% yield, >20:1 dr, 99% ee, m.p. 228.3 – 229.2 °C,  $[\alpha]_D^{18} +192$  (c = 1.00, CH<sub>2</sub>Cl<sub>2</sub>), purified by column chromatography on silica gel (petroleum ether/EtOAc = 5:1). <sup>1</sup>H NMR (400 MHz, CDCl<sub>3</sub>)  $\delta$  7.38 – 7.22 (m, 5H), 7.17 – 7.05 (m, 3H), 6.98 (td, *J* = 8.8, 2.5 Hz, 1H), 6.95 – 6.86 (m, 2H), 6.83 – 6.72 (m, 2H), 6.69 (s, 1H), 5.93 (s, 1H), 5.91 (s, 1H), 5.90 (s, 1H), 4.86 (q, *J* = 15.6 Hz, 2H), 3.38 (dd, *J* = 7.6, 3.4 Hz, 1H), 3.30 (dd, *J* = 13.8, 7.6 Hz, 1H), 2.22 (dd, *J* = 13.8, 3.4 Hz, 1H). <sup>13</sup>C NMR (100 MHz, CDCl<sub>3</sub>)  $\delta$  175.1, 167.5, 160.9, 158.4, 148.7, 147.1, 144.4, 140.0, 140.0, 139.0, 135.1, 129.7, 129.6, 129.0, 128.7, 128.3, 128.1, 127.5, 126.5, 116.4, 116.2, 114.8, 112.7, 112.4, 110.8, 110.7, 105.3, 102.0, 99.9, 54.9, 54.9, 47.8, 44.3, 31.6. <sup>19</sup>F NMR (376 MHz, CDCl<sub>3</sub>)  $\delta$  –118.34 (s). HRMS (ESI): [M+Na]<sup>+</sup> Calcd. for C<sub>31</sub>H<sub>22</sub>FNO<sub>5</sub>Na: 530.1374; Found: 530.1382. HPLC (Chiralpak AD–H column, *n*-hexane/*i*-PrOH = 50/50, flow rate = 1.0 mL/min,  $\lambda$  = 254 nm): *t*<sub>R</sub> = 15.726 min (minor), 29.175 min (major).

**(3*S*,7'*S*)-1,7'-dibenzyl-5-chlorospiro[indoline-3,8'-[1,3]dioxolo[4,5-*g*]chromene]-2,6'(7'*H*)-dione (3c)**

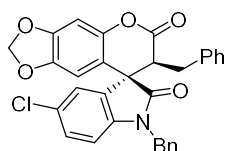

White solid, 37.2 mg, 71% yield, >20:1 dr, 91% ee, m.p. 146.3 – 147.7 °C,  $[\alpha]_D^{19} +202$  (c = 1.00, CH<sub>2</sub>Cl<sub>2</sub>), purified by column chromatography on silica gel (petroleum ether/EtOAc = 5:1). <sup>1</sup>H NMR (400 MHz, CDCl<sub>3</sub>)  $\delta$  7.31 – 7.26 (m, 3H), 7.23 – 7.21 (m, 3H), 7.17 – 7.07 (m, 3H), 7.06 – 7.01 (m, 2H), 6.99 – 6.97 (m, 2H), 6.66 (s, 1H), 5.91 – 5.89 (m, 3H), 5.32 (d, *J* = 16.0 Hz, 1H), 5.23 (d, *J* = 16.0 Hz, 1H), 3.38 (dd, *J* = 8.1, 3.0 Hz, 1H), 3.19 (dd, *J* = 14.0, 8.1 Hz, 1H), 2.27 (dd, *J* = 14.0, 3.0 Hz, 1H). <sup>13</sup>C NMR (100 MHz, CDCl<sub>3</sub>)  $\delta$  176.0, 167.5, 148.7, 147.1, 144.4, 140.4, 139.0, 137.1, 132.4, 131.2, 128.9, 128.7, 128.3, 127.5, 126.8, 126.5, 124.6, 123.2, 116.3, 115.1, 105.5, 102.0, 99.8, 54.2, 48.0, 45.2, 31.5. HRMS (ESI): [M+Na]<sup>+</sup> Calcd. for C<sub>31</sub>H<sub>22</sub>ClNO<sub>5</sub>Na: 546.1078; Found: 546.1078. HPLC (Chiralpak AD–H column, *n*-hexane/*i*-PrOH = 50/50, flow rate = 1.0 mL/min,  $\lambda$  = 254 nm): t<sub>R</sub> = 9.085 min (minor), 36.592 min (major).

**(3*S*,7'*S*)-1,7'-dibenzyl-5-bromospiro[indoline-3,8'-[1,3]dioxolo[4,5-*g*]chromene]-2,6'(7'*H*)-dione (3d)**

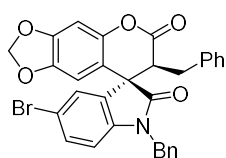

White solid, 35.8 mg, 63% yield, >20:1 dr, 87% ee, m.p. 223.4 – 234.6 °C,  $[\alpha]_D^{19} +178$  (c = 1.00, CH<sub>2</sub>Cl<sub>2</sub>), purified by column chromatography on silica gel (petroleum ether/EtOAc = 5:1). <sup>1</sup>H NMR (400 MHz, CDCl<sub>3</sub>)  $\delta$  7.39 – 7.26 (m, 6H), 7.12 – 7.10 (m, 4H), 6.88 – 6.86 (m, 2H), 6.71 (d, *J* = 8.9 Hz, 2H), 5.94 (s, 1H), 5.92 (s, 1H), 5.90 (s, 1H), 4.88 (d, *J* = 15.5 Hz, 1H), 4.81 (d, *J* = 15.5 Hz, 1H), 3.39 (dd, *J* = 7.0, 3.8 Hz, 1H), 3.34 (dd, *J* = 13.7, 7.2 Hz, 1H), 2.22 (dd, *J* = 13.7, 3.6 Hz, 1H). <sup>13</sup>C NMR (400 MHz, CDCl<sub>3</sub>)  $\delta$  174.8, 167.5, 148.7, 147.1, 144.4, 143.0, 138.8, 134.9, 132.6, 130.0, 129.0, 128.6, 128.3, 128.2, 127.9, 127.5, 126.5, 116.4, 114.8, 111.3, 105.3, 102.0, 99.9, 54.6, 47.7, 44.2, 31.6. HRMS (ESI): [M+Na]<sup>+</sup> Calcd. for C<sub>31</sub>H<sub>22</sub>BrNO<sub>5</sub>Na: 590.0573; Found: 590.0589. HPLC (Chiralpak AD–H column, *n*-hexane/*i*-PrOH = 75/25, flow rate = 1.0 mL/min,  $\lambda$  = 254 nm): t<sub>R</sub> = 37.534 min (minor), 41.221 min (major).

**(3*S*,7'*S*)-1,7'-dibenzyl-5-nitrospiro[indoline-3,8'-[1,3]dioxolo[4,5-*g*]chromene]-2,6'(7'*H*)-dione (3e)**

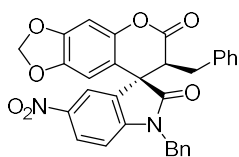

White solid, 32.0 mg, >20:1 dr, 60% yield, >99% ee, m.p. 156.3 – 157.6 °C,  $[\alpha]_D^{20} +242$  (c = 1.00, CH<sub>2</sub>Cl<sub>2</sub>), purified by column chromatography on silica gel (petroleum ether/EtOAc = 5:1). <sup>1</sup>H NMR (400 MHz, CDCl<sub>3</sub>)  $\delta$  8.13 (dd, *J* = 8.7, 2.0 Hz, 1H), 7.70 (d, *J* = 1.9 Hz, 1H), 7.37 – 7.31 (m, 5H), 6.99 – 6.97 (m, 3H), 6.91 (d, *J* = 8.7 Hz, 1H), 6.70 (d, *J* = 5.9 Hz, 3H), 5.88 (d, *J* = 6.7 Hz, 2H), 5.77 (s, 1H), 4.95 (d, *J* = 15.5 Hz, 1H), 4.88 (d, *J* = 15.5 Hz, 1H), 3.60 – 3.57 (m, 1H), 3.46 (dd, *J* = 14.6, 5.7 Hz, 1H), 2.23 (dd, *J* = 14.6, 6.2 Hz, 1H). <sup>13</sup>C NMR (100 MHz, CDCl<sub>3</sub>)  $\delta$  175.5, 167.2, 149.2, 149.0, 147.1, 144.5, 143.9, 138.4, 134.4, 129.3, 128.7, 128.6, 128.4, 128.2, 127.7, 126.4, 126.3, 120.9, 114.0, 109.4, 104.8, 102.1, 100.1, 54.2, 47.3, 44.6, 31.9. HRMS (ESI) *m/z*: [M+H]<sup>+</sup> Calcd. for C<sub>31</sub>H<sub>23</sub>N<sub>2</sub>O<sub>7</sub>: 535.1500; Found: 535.1491. HPLC (Chiralpak AD–

H column, *n*-hexane/*i*-PrOH = 55/45, flow rate = 1.0 mL/min,  $\lambda$  = 220 nm):  $t_R$  = 15.603 min (minor), 19.308 min (major).

**(3*S*,7'*S*)-1,7'-dibenzyl-5-methylspiro[indoline-3,8'-[1,3]dioxolo[4,5-*g*]chromene]-2,6'(7'*H*)-dione (3f)**

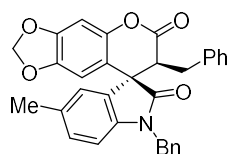

White solid, 45.8 mg, 91% yield, >20:1 dr, 90% ee, m.p. 234.1 – 235.3 °C,  $[\alpha]_D^{19}$  +215 (c = 1.00, CH<sub>2</sub>Cl<sub>2</sub>), purified by column chromatography on silica gel (petroleum ether/EtOAc = 5:1). <sup>1</sup>H NMR (400 MHz, CDCl<sub>3</sub>)  $\delta$  7.33 – 7.26 (m, 5H), 7.13 – 7.05 (m, 4H), 6.93 – 6.89 (m, 2H), 6.84 (s, 1H), 6.72 (d, *J* = 8.0 Hz, 1H), 6.68 (s, 1H), 5.94 (s, 1H), 5.92 (d, *J* = 1.3 Hz, 1H), 5.90 (d, *J* = 1.2 Hz, 1H), 4.89 (d, *J* = 15.5 Hz, 1H), 4.82 (d, *J* = 15.5 Hz, 1H), 3.38 (dd, *J* = 7.6, 3.5 Hz, 1H), 3.28 (dd, *J* = 14.0, 7.6 Hz, 1H), 2.25 (s, 3H), 2.22 (dd, *J* = 14.0, 3.6 Hz, 1H). <sup>13</sup>C NMR (100 MHz, CDCl<sub>3</sub>)  $\delta$  175.3, 168.0, 148.4, 147.2, 144.2, 141.7, 139.5, 135.5, 133.5, 130.0, 129.0, 128.9, 128.7, 128.5, 128.2, 128.0, 127.9, 127.5, 126.2, 125.3, 115.7, 109.7, 105.7, 101.8, 99.7, 54.6, 48.0, 44.1, 31.5, 21.1. HRMS (ESI): [M+Na]<sup>+</sup> Calcd. for C<sub>32</sub>H<sub>25</sub>NO<sub>5</sub>Na: 526.1624; Found: 526.1637. HPLC (Chiralpak AD–H column, *n*-hexane/*i*-PrOH = 50/50, flow rate = 1.0 mL/min,  $\lambda$  = 254 nm):  $t_R$  = 12.628 min (minor), 18.135 min (major).

**(3*S*,7'*S*)-1,7'-dibenzyl-5-methoxyspiro[indoline-3,8'-[1,3]dioxolo[4,5-*g*]chromene]-2,6'(7'*H*)-dione (3g)**

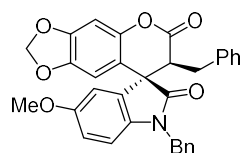

White solid, 48.7 mg, 92% yield, >20:1 dr, 90% ee, m.p. 225.1 – 226.2 °C,  $[\alpha]_D^{18}$  +183 (c = 1.00, CH<sub>2</sub>Cl<sub>2</sub>), purified by column chromatography on silica gel (petroleum ether/EtOAc = 4:1). <sup>1</sup>H NMR (400 MHz, CDCl<sub>3</sub>)  $\delta$  7.33 – 7.25 (m, 5H), 7.12 – 7.08 (m, 3H), 6.94 (d, *J* = 6.7 Hz, 2H), 6.81 – 6.79 (m, 2H), 6.74 (d, *J* = 8.5 Hz, 2H), 6.68 (s, 1H), 6.64 (s, 1H), 5.94 (s, 1H), 5.92 (s, 1H), 5.90 (s, 1H), 4.89 (d, *J* = 15.5 Hz, 1H), 4.81 (d, *J* = 15.5 Hz, 1H), 3.69 (s, 3H), 3.38 (dd, *J* = 7.4, 3.0 Hz, 1H), 3.30 (dd, *J* = 13.8, 7.6 Hz, 1H), 2.23 (dd, *J* = 13.7, 2.5 Hz, 1H). <sup>13</sup>C NMR (100 MHz, CDCl<sub>3</sub>)  $\delta$  175.1, 167.9, 156.7, 148.5, 147.1, 144.3, 139.5, 137.4, 135.5, 129.2, 128.9, 128.8, 128.2, 127.9, 127.5, 126.2, 115.5, 114.5, 111.3, 110.6, 105.7, 101.9, 99.7, 55.8, 55.0, 48.0, 44.2, 31.5. HRMS (ESI): [M+Na]<sup>+</sup> Calcd. for C<sub>32</sub>H<sub>25</sub>NO<sub>6</sub>Na: 542.1574; Found: 542.1576. HPLC (Chiralpak AD–H column, *n*-hexane/*i*-PrOH = 50/50, flow rate = 1.0 mL/min,  $\lambda$  = 254 nm):  $t_R$  = 20.042 min (minor), 34.554 min (major).

**(3*S*,7'*S*)-1,7'-dibenzyl-5-phenylspiro[indoline-3,8'-[1,3]dioxolo[4,5-*g*]chromene]-2,6'(7'*H*)-dione (3h)**

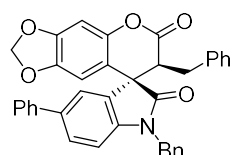

White solid, 43.9 mg, >20:1 dr, 78% yield, 88% ee, m.p. 121.4 – 122.9 °C,  $[\alpha]_D^{20}$  +245 (c = 1.00, CH<sub>2</sub>Cl<sub>2</sub>), purified by column chromatography on silica gel (petroleum ether/EtOAc = 5:1). <sup>1</sup>H NMR (600 MHz, CDCl<sub>3</sub>)  $\delta$  7.49 (dd, *J* = 8.2, 1.6 Hz, 1H), 7.40 – 7.26 (m, 10H), 7.20 (d, *J* = 1.3 Hz, 1H), 7.10 – 7.01 (m, 3H), 6.93 – 6.89 (m, 3H), 6.69 (s, 1H), 5.96 (s, 1H), 5.85 – 5.82 (m, 2H), 4.91 (s, 2H), 3.42 – 3.34 (m, 2H), 2.25 (dd, *J* = 13.3, 2.8 Hz, 1H). <sup>13</sup>C NMR (151 MHz, CDCl<sub>3</sub>)  $\delta$  175.4, 168.0, 148.5, 147.2, 144.3, 143.4, 140.1, 139.5, 137.2, 135.4, 129.0, 128.9, 128.8, 128.6, 128.5, 128.3, 128.1, 127.6, 127.4, 126.8, 126.4, 123.5, 115.4, 110.2, 105.6, 101.9, 99.8, 54.7, 48.1, 44.3, 31.6. HRMS (ESI) *m/z*: [M+H]<sup>+</sup> Calcd. for C<sub>37</sub>H<sub>28</sub>NO<sub>5</sub>: 566.1962; Found: 566.1955. HPLC (Chiralpak IC column, *n*-hexane/*i*-PrOH = 30/70, flow rate = 1.0 mL/min,  $\lambda$  = 254 nm): *t*<sub>R</sub> = 31.188 min (minor), 42.298 min (major).

**(3*S*,7'*S*)-1,7'-dibenzyl-6-fluorospiro[indoline-3,8'-[1,3]dioxolo[4,5-*g*]chromene]-2,6'(7'*H*)-dione (3i)**

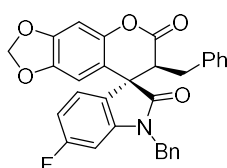

White solid, 43.6 mg, >20:1 dr, 86% yield, 95% ee, m.p. 110.1 – 112.6 °C,  $[\alpha]_D^{20}$  +228 (c = 1.00, CH<sub>2</sub>Cl<sub>2</sub>), purified by column chromatography on silica gel (petroleum ether/EtOAc = 6:1). <sup>1</sup>H NMR (600 MHz, CDCl<sub>3</sub>)  $\delta$  7.35 – 7.32 (m, 2H), 7.30 – 7.28 (m, 3H), 7.14 – 7.08 (m, 3H), 7.02 – 6.99 (m, 1H), 6.92 (d, *J* = 7.0 Hz, 2H), 6.77 – 6.74 (m, 1H), 6.69 (s, 1H), 6.60 – 6.58 (m, 1H), 5.93 – 5.90 (m, 3H), 4.87 (d, *J* = 15.6 Hz, 1H), 4.80 (d, *J* = 15.6 Hz, 1H), 3.39 – 3.37 (m, 1H), 3.27 (dd, *J* = 14.0, 7.7 Hz, 1H), 2.21 (dd, *J* = 14.0, 3.3 Hz, 1H). <sup>13</sup>C NMR (151 MHz, CDCl<sub>3</sub>)  $\delta$  175.6, 167.7, 148.6, 147.1, 145.6, 145.6, 144.3, 139.2, 134.8, 129.1, 128.8, 128.3, 128.2, 127.5, 126.4, 125.8, 125.7, 123.3, 123.3, 115.2, 110.2, 110.0, 105.4, 101.9, 99.8, 98.9, 98.7, 54.2, 48.1, 44.3, 31.5. <sup>19</sup>F NMR (565 MHz, CDCl<sub>3</sub>)  $\delta$  -108.93 (s). HRMS (ESI) *m/z*: [M+H]<sup>+</sup> Calcd. for C<sub>31</sub>H<sub>23</sub>FNO<sub>5</sub>: 508.1555; Found: 508.1550. HPLC (Chiralpak AD-H column, *n*-hexane/*i*-PrOH = 50/50, flow rate = 1.0 mL/min,  $\lambda$  = 254 nm): *t*<sub>R</sub> = 13.582 min (minor), 16.532 min (major).

**(3*S*,7'*S*)-1,7'-dibenzyl-6-chlorospiro[indoline-3,8'-[1,3]dioxolo[4,5-*g*]chromene]-2,6'(7'*H*)-dione (3j)**

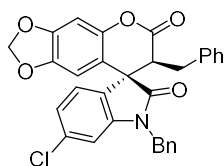

White solid, 48.9 mg, 78% yield, >20:1, 94% ee, m.p. 236.9 – 237.7 °C,  $[\alpha]_D^{18}$  +186 (c = 1.00, CH<sub>2</sub>Cl<sub>2</sub>), purified by column chromatography on silica gel (petroleum ether/EtOAc = 5:1). <sup>1</sup>H NMR (400 MHz, CDCl<sub>3</sub>)  $\delta$  7.36 – 7.26 (m, 5H), 7.13 – 7.09 (m, 3H), 7.06 – 7.03 (m, 1H), 6.98 (d, *J* = 8.0 Hz, 1H), 6.93 – 6.92 (m, 2H), 6.84 (s, 1H), 6.69 (s, 1H), 5.93 (s, 1H), 5.91 (s, 1H), 5.90 (s, 1H), 4.87 (d, *J* = 15.6 Hz, 1H), 4.81 (d, *J* = 15.6 Hz, 1H), 3.38 (dd, *J* = 7.6, 3.3 Hz, 1H), 3.27 (dd, *J* = 13.9, 7.7 Hz, 1H), 2.21 (dd, *J* = 13.9, 3.1 Hz, 1H). <sup>13</sup>C NMR (100 MHz, CDCl<sub>3</sub>)  $\delta$  175.3, 167.6, 148.7, 147.1, 145.2, 144.4, 139.1, 135.6, 134.8, 129.1, 128.8, 128.3, 128.2, 127.4, 126.4, 125.5, 123.7, 114.9, 110.6, 105.4, 102.0, 99.9, 54.2, 47.9, 44.3, 31.5.

HRMS (ESI):  $[M+Na]^+$  Calcd. for  $C_{31}H_{22}ClNO_5Na$ : 546.1078; Found: 546.1076. HPLC (Chiralpak AD–H column, *n*-hexane/*i*-PrOH = 50/50, flow rate = 1.0 mL/min,  $\lambda$  = 254 nm):  $t_R$  = 11.605 min (major), 14.283 min (minor).

**(3S,7'S)-1,7'-dibenzyl-6-bromospiro[indoline-3,8'-[1,3]dioxolo[4,5-g]chromene]-2,6'(7'H)-dione (3k)**

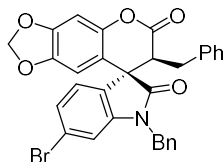

White solid, 39.8 mg, 70% yield, >20:1 dr, 93% ee, m.p. 245.7 – 247.2 °C,  $[\alpha]_D^{18}$  +238 (c = 1.00,  $CH_2Cl_2$ ), purified by column chromatography on silica gel (petroleum ether/EtOAc = 5:1).  $^1H$  NMR (400 MHz,  $CDCl_3$ )  $\delta$  7.36 – 7.27 (m, 5H), 7.20 (dd,  $J$  = 7.9, 1.5 Hz, 1H), 7.15 – 7.08 (m, 3H), 6.99 (d,  $J$  = 1.4 Hz, 1H), 6.92 – 6.91 (m, 3H), 6.69 (s, 1H), 5.93 (s, 1H), 5.92 (s, 1H), 5.90 (s, 1H), 4.87 (d,  $J$  = 15.6 Hz, 1H), 4.81 (d,  $J$  = 15.6 Hz, 1H), 3.37 (dd,  $J$  = 7.6, 3.4 Hz, 1H), 3.27 (dd,  $J$  = 13.9, 7.7 Hz, 1H), 2.21 (dd,  $J$  = 13.9, 3.3 Hz, 1H).  $^{13}C$  NMR (100 MHz,  $CDCl_3$ )  $\delta$  175.1, 167.5, 148.7, 147.1, 145.4, 144.4, 139.1, 134.8, 129.1, 128.7, 128.3, 128.2, 127.4, 127.0, 126.6, 126.4, 125.8, 123.4, 114.8, 113.3, 105.4, 102.0, 99.9, 54.3, 47.9, 44.2, 31.5. HRMS (ESI):  $[M+Na]^+$  Calcd. for  $C_{31}H_{22}BrNO_5Na$ : 590.0573; Found: 339.0559. HPLC (Chiralpak AD–H column, *n*-hexane/*i*-PrOH = 50/50, flow rate = 1.0 mL/min,  $\lambda$  = 254 nm):  $t_R$  = 11.288 min (minor), 14.784 min (major).

**(3S,7'S)-1,7'-dibenzyl-6-phenylspiro[indoline-3,8'-[1,3]dioxolo[4,5-g]chromene]-2,6'(7'H)-dione (3l)**

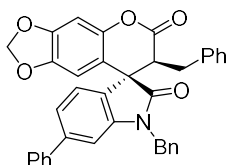

White solid, 48.0 mg, >20:1 dr, 85% yield, 96% ee, m.p. 133.3 – 1347 °C,  $[\alpha]_D^{20}$  +219 (c = 1.00,  $CH_2Cl_2$ ), purified by column chromatography on silica gel (petroleum ether/EtOAc = 5:1).  $^1H$  NMR (600 MHz,  $CDCl_3$ )  $\delta$  7.50 – 7.44 (m, 4H), 7.40 – 7.38 (m, 1H), 7.33 (d,  $J$  = 4.4 Hz, 4H), 7.29 – 7.26 (m, 2H), 7.13 – 7.09 (m, 4H), 7.04 (d,  $J$  = 1.1 Hz, 1H), 6.96 (d,  $J$  = 6.6 Hz, 2H), 6.70 (s, 1H), 6.01 (s, 1H), 5.93 – 5.91 (m, 2H), 4.95 (d,  $J$  = 15.6 Hz, 1H), 4.90 (d,  $J$  = 15.6 Hz, 1H), 3.44 – 3.42 (m, 1H), 3.29 (dd,  $J$  = 14.0, 7.8 Hz, 1H), 2.29 (dd,  $J$  = 14.0, 3.3 Hz, 1H).  $^{13}C$  NMR (151 MHz,  $CDCl_3$ )  $\delta$  175.5, 167.9, 148.5, 147.2, 144.7, 144.3, 143.2, 140.4, 139.4, 135.4, 129.0, 129.0, 128.8, 128.3, 128.0, 128.0, 127.5, 127.2, 126.9, 126.3, 124.8, 122.7, 115.5, 108.7, 105.7, 101.9, 99.8, 54.5, 48.2, 44.2, 31.6. HRMS (ESI)  $m/z$ :  $[M+H]^+$  Calcd. for  $C_{37}H_{28}NO_5$ : 566.1962; Found: 566.1954. HPLC (Chiralpak IC column, *n*-hexane/*i*-PrOH = 35/65, flow rate = 1.0 mL/min,  $\lambda$  = 254 nm):  $t_R$  = 36.503 min (minor), 39.938 min (major).

**(3S,7'S)-1,7'-dibenzyl-7-fluorospiro[indoline-3,8'-[1,3]dioxolo[4,5-g]chromene]-2,6'(7'H)-dione (3m)**



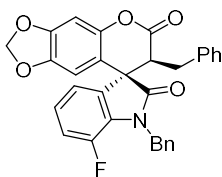

White solid, 44.7 mg, 88% yield, >20:1 dr, 92% ee, m.p. 237.1 – 238.4 °C,  $[\alpha]_D^{18} +54$  (c = 1.00, CH<sub>2</sub>Cl<sub>2</sub>), purified by column chromatography on silica gel (petroleum ether/EtOAc = 5:1). <sup>1</sup>H NMR (400 MHz, CDCl<sub>3</sub>)  $\delta$  7.35 – 7.22 (m, 5H), 7.14 – 7.01 (m, 5H), 6.92 – 6.86 (m, 3H), 6.67 (s, 1H), 5.89 (dd, *J* = 6.5, 1.2 Hz, 2H), 5.86 (s, 1H), 5.03 – 4.95 (m, 2H), 3.37 (dd, *J* = 7.9, 3.2 Hz, 1H), 3.20 (dd, *J* = 14.1, 8.0 Hz, 1H), 2.18 (dd, *J* = 14.0, 3.2 Hz, 1H). <sup>13</sup>C NMR (100 MHz, CDCl<sub>3</sub>)  $\delta$  175.1, 167.5, 148.9, 148.7, 147.1, 146.4, 144.3, 139.1, 136.6, 131.1, 131.1, 131.0, 130.9, 128.8, 128.7, 128.3, 127.9, 127.8, 127.8, 126.4, 124.6, 124.5, 120.5, 120.5, 118.0, 117.8, 115.0, 105.5, 102.0, 99.8, 54.8, 54.8, 48.0, 45.7, 45.7. <sup>19</sup>F NMR (376 MHz, CDCl<sub>3</sub>)  $\delta$  –131.94 (s). HRMS (ESI) *m/z*: [M+Na]<sup>+</sup> Calcd. for C<sub>31</sub>H<sub>22</sub>FNO<sub>5</sub>Na: 530.1374; Found: 530.1347. HPLC (Chiralpak AD–H column, *n*-hexane/*i*-PrOH = 50/50, flow rate = 1.0 mL/min,  $\lambda$  = 254 nm): *t*<sub>R</sub> = 10.182 min (minor), 29.873 min (major).

**(3S,7'S)-1,7'-dibenzyl-7-chlorospiro[indoline-3,8'-[1,3]dioxolo[4,5-g]chromene]-2,6'(7'H)-dione (3n)**

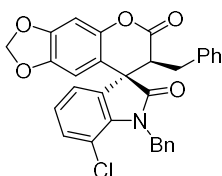

White solid, 49.3 mg, 94% yield, >20:1 dr, 86% ee, m.p. 156.8 – 157.5 °C,  $[\alpha]_D^{19} +194$  (c = 1.00, CH<sub>2</sub>Cl<sub>2</sub>), purified by column chromatography on silica gel (petroleum ether/EtOAc = 5:1). <sup>1</sup>H NMR (400 MHz, CDCl<sub>3</sub>)  $\delta$  7.32 – 7.21 (m, 6H), 7.18 – 7.08 (m, 3H), 7.06 – 7.01 (m, 2H), 6.99 – 6.97 (m, 2H), 6.68 (s, 1H), 5.93 – 5.91 (m, 3H), 5.33 (d, *J* = 16.0 Hz, 1H), 5.24 (d, *J* = 16.0 Hz, 1H), 3.37 (dd, *J* = 8.1, 3.0 Hz, 1H), 3.19 (dd, *J* = 14.0, 8.1 Hz, 1H), 2.27 (dd, *J* = 14.0, 2.9 Hz, 1H). <sup>13</sup>C NMR (100 MHz, CDCl<sub>3</sub>)  $\delta$  176.0, 167.5, 148.7, 147.1, 144.4, 140.4, 139.0, 137.1, 132.4, 131.2, 128.9, 128.7, 128.3, 127.5, 126.8, 126.5, 124.6, 123.2, 116.3, 115.2, 105.5, 102.0, 99.8, 54.3, 48.0, 45.2, 31.5. HRMS (ESI): [M+Na]<sup>+</sup> Calcd. for C<sub>31</sub>H<sub>22</sub>ClNO<sub>5</sub>Na: 546.1078; Found: 546.1078. HPLC (Chiralpak AD–H column, *n*-hexane/*i*-PrOH = 40/60, flow rate = 1.0 mL/min,  $\lambda$  = 254 nm): *t*<sub>R</sub> = 8.280 min (minor), 30.610 min (major).

**(3S,7'S)-1,7'-dibenzyl-7-bromospiro[indoline-3,8'-[1,3]dioxolo[4,5-g]chromene]-2,6'(7'H)-dione (3o)**

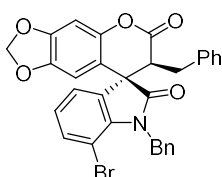

White solid, 47.7 mg, 84% yield, >20:1 dr, 88% ee, m.p. 196.3 – 198.1 °C,  $[\alpha]_D^{18} +179$  (c = 1.00, CH<sub>2</sub>Cl<sub>2</sub>), purified by column chromatography on silica gel (petroleum ether/EtOAc = 5:1). <sup>1</sup>H NMR (400 MHz, CDCl<sub>3</sub>)

$\delta$  7.49 (d,  $J$  = 8.0 Hz, 1H), 7.29 – 7.07 (m, 9H), 7.00 (t,  $J$  = 7.8 Hz, 3H), 6.66 (s, 1H), 5.92 (s, 2H), 5.90 (s, 1H), 5.37 (d,  $J$  = 16.3 Hz, 1H), 5.28 (d,  $J$  = 16.2 Hz, 1H), 3.37 (dd,  $J$  = 8.1, 2.8 Hz, 1H), 3.18 (dd,  $J$  = 13.9, 8.2 Hz, 1H), 2.29 (dd,  $J$  = 13.9, 2.6 Hz, 1H).  $^{13}\text{C}$  NMR (100 MHz,  $\text{CDCl}_3$ )  $\delta$  176.1, 167.4, 148.7, 147.1, 144.4, 141.8, 139.0, 137.0, 135.8, 131.6, 128.9, 128.7, 128.3, 127.4, 126.6, 126.5, 125.0, 123.8, 115.2, 105.4, 103.4, 102.0, 99.8, 54.2, 48.1, 44.8, 31.5. HRMS (ESI):  $[\text{M}+\text{Na}]^+$  Calcd. for  $\text{C}_{31}\text{H}_{22}\text{BrNO}_5\text{Na}$ : 590.0573; Found: 590.0575. HPLC (Chiralpak AD–H column, *n*-hexane/*i*-PrOH = 40/60, flow rate = 1.0 mL/min,  $\lambda$  = 254 nm):  $t_{\text{R}}$  = 8.294 min (minor), 30.418 min (major).

**(3*S*,7'*S*)-1,7'-dibenzyl-7-(trifluoromethyl)spiro[indoline-3,8'-[1,3]dioxolo[4,5-*g*]chromene]-2,6'(7'*H*)-dione (3p)**

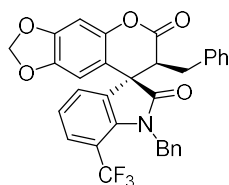

White solid, 36.5 mg, >20:1 dr, 66% yield, 98% ee, m.p. 107.5 – 108.9 °C,  $[\alpha]_{\text{D}}^{20}$  +102 ( $c$  = 1.00,  $\text{CH}_2\text{Cl}_2$ ), purified by column chromatography on silica gel (petroleum ether/EtOAc = 6:1).  $^1\text{H}$  NMR (600 MHz,  $\text{CDCl}_3$ )  $\delta$  7.69 (d,  $J$  = 8.0 Hz, 1H), 7.30 – 7.06 (m, 11H), 6.95 (d,  $J$  = 6.9 Hz, 2H), 6.69 (s, 1H), 5.94 – 5.89 (m, 3H), 5.21 (d,  $J$  = 16.9 Hz, 1H), 5.03 (d,  $J$  = 16.9 Hz, 1H), 3.44 – 3.42 (m, 1H), 3.21 (dd,  $J$  = 14.2, 7.7 Hz, 1H), 2.31 (dd,  $J$  = 14.2, 3.5 Hz, 1H).  $^{13}\text{C}$  NMR (151 MHz,  $\text{CDCl}_3$ )  $\delta$  176.5, 167.2, 148.8, 147.2, 144.4, 142.5, 138.7, 135.8, 131.1, 128.8, 128.4, 128.4, 127.2, 126.5, 126.0, 123.2, 114.8, 105.2, 102.0, 100.0, 52.9, 47.9, 45.9, 31.6.  $^{19}\text{F}$  NMR (565 MHz,  $\text{CDCl}_3$ )  $\delta$  –54.91 (s). HRMS (ESI)  $m/z$ :  $[\text{M}+\text{H}]^+$  Calcd. for  $\text{C}_{32}\text{H}_{23}\text{F}_3\text{NO}_5$ : 558.1523; Found: 558.1518. HPLC (Chiralpak IC column, *n*-hexane/*i*-PrOH = 50/50, flow rate = 1.0 mL/min,  $\lambda$  = 254 nm):  $t_{\text{R}}$  = 6.272 min (minor), 17.414 min (major).

**(3*S*,7'*S*)-1,7'-dibenzyl-7-methylspiro[indoline-3,8'-[1,3]dioxolo[4,5-*g*]chromene]-2,6'(7'*H*)-dione (3q)**

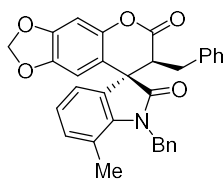

Yellow solid, 45.3 mg, 90% yield, >20:1 dr, > 99% ee, m.p. 106.3 – 107.9 °C,  $[\alpha]_{\text{D}}^{18}$  +268 ( $c$  = 1.00,  $\text{CH}_2\text{Cl}_2$ ), purified by column chromatography on silica gel (petroleum ether/EtOAc = 5:1).  $^1\text{H}$  NMR (400 MHz,  $\text{CDCl}_3$ )  $\delta$  7.31 – 7.23 (m, 3H), 7.21 – 7.03 (m, 10H), 6.67 (s, 1H), 6.00 (s, 1H), 5.93 (s, 1H), 5.91 (s, 1H), 5.19 (d,  $J$  = 16.8 Hz, 1H), 5.06 (d,  $J$  = 16.8 Hz, 1H), 3.37 (dd,  $J$  = 8.6, 2.0 Hz, 1H), 3.19 (dd,  $J$  = 13.7, 8.7 Hz, 1H), 2.36 – 2.34 (m, 4H).  $^{13}\text{C}$  NMR (100 MHz,  $\text{CDCl}_3$ )  $\delta$  176.3, 167.9, 148.4, 147.2, 144.2, 142.5, 139.4, 137.3, 133.8, 129.1, 129.0, 128.3, 127.4, 126.4, 125.7, 123.9, 122.4, 120.8, 116.1, 105.8, 101.9, 99.7, 54.1, 48.3, 45.3, 31.5, 18.9. HRMS (ESI):  $[\text{M}+\text{Na}]^+$  Calcd. for  $\text{C}_{32}\text{H}_{25}\text{NO}_5\text{Na}$ : 526.1624; Found: 526.1637. HPLC

(Chiralpak AD–H column, *n*-hexane/*i*-PrOH = 60/40, flow rate = 1.0 mL/min,  $\lambda$  = 254 nm):  $t_R$  = 11.684 min (minor), 50.528 min (major)

**(3*S*,7'*S*)-1,7'-dibenzyl-5,7-dimethylspiro[indoline-3,8'-[1,3]dioxolo[4,5-*g*]chromene]-2,6'(7'*H*)-dione (3r)**

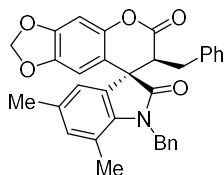

White solid, 43.5 mg, 84% yield, >20:1 dr, 92% ee, m.p. 124.3 – 125.6 °C,  $[\alpha]_D^{18}$  +208 (c = 1.00, CH<sub>2</sub>Cl<sub>2</sub>), purified by column chromatography on silica gel (petroleum ether/EtOAc = 5:1). <sup>1</sup>H NMR (400 MHz, CDCl<sub>3</sub>)  $\delta$  7.30 – 7.10 (m, 8H), 7.04 – 7.02 (m, 2H), 6.88 (s, 1H), 6.79 (s, 1H), 6.67 (s, 1H), 6.02 (s, 1H), 5.92 (dd,  $J$  = 10.0, 1.2 Hz, 2H), 5.17 (d,  $J$  = 16.8 Hz, 1H), 5.03 (d,  $J$  = 16.7 Hz, 1H), 3.36 (dd,  $J$  = 8.2, 2.7 Hz, 1H), 3.23 (dd,  $J$  = 13.8, 8.2 Hz, 1H), 3.35 (dd,  $J$  = 13.8, 2.6 Hz, 1H), 2.30 (s, 3H), 2.27 (s, 3H). <sup>13</sup>C NMR (100 MHz, CDCl<sub>3</sub>)  $\delta$  176.3, 168.0, 148.4, 147.2, 144.2, 140.0, 139.6, 137.4, 134.2, 133.5, 129.0, 128.9, 128.8, 128.2, 127.4, 126.3, 125.8, 123.1, 120.5, 116.3, 105.8, 101.9, 99.7, 54.1, 48.2, 45.2, 31.5, 20.8, 18.7. HRMS (ESI): [M+Na]<sup>+</sup> Calcd. for C<sub>33</sub>H<sub>27</sub>NO<sub>5</sub>Na: 540.1781; Found: 540.1775. HPLC (Chiralpak IC column, *n*-hexane/*i*-PrOH = 40/60, flow rate = 1.0 mL/min,  $\lambda$  = 254 nm):  $t_R$  = 36.632 min (minor), 50.335 min (major).

**(3*S*,7'*S*)-7'-benzyl-1-methylspiro[indoline-3,8'-[1,3]dioxolo[4,5-*g*]chromene]-2,6'(7'*H*)-dione (3s)**

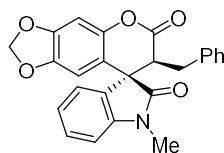

Yellow solid, 26.9 mg, 65% yield, >20:1 dr, 97% ee, m.p. 223.9 – 224.3 °C,  $[\alpha]_D^{19}$  +222 (c = 1.00, CH<sub>2</sub>Cl<sub>2</sub>), purified by column chromatography on silica gel (petroleum ether/EtOAc = 6:1). <sup>1</sup>H NMR (400 MHz, CDCl<sub>3</sub>)  $\delta$  7.46 – 7.42 (m, 1H), 7.20 – 7.08 (m, 5H), 6.99 – 6.96 (m, 3H), 6.66 (s, 1H), 5.91 (s, 2H), 5.87 (s, 1H), 3.35 (dd,  $J$  = 8.2, 2.6 Hz, 1H), 3.15 – 3.12 (m, 4H), 2.23 (dd,  $J$  = 13.9, 2.6 Hz, 1H). <sup>13</sup>C NMR (100 MHz, CDCl<sub>3</sub>)  $\delta$  175.2, 168.0, 148.4, 147.1, 145.1, 144.1, 139.2, 130.0, 129.0, 128.2, 128.1, 126.3, 124.5, 123.8, 115.5, 108.9, 105.8, 101.8, 99.7, 54.6, 47.8, 31.3, 26.5. HRMS (ESI): [M+Na]<sup>+</sup> Calcd. for C<sub>25</sub>H<sub>19</sub>NO<sub>5</sub>Na: 436.1155; Found: 436.1155. HPLC (Chiralpak AD–H column, *n*-hexane/*i*-PrOH = 70/30, flow rate = 1.0 mL/min,  $\lambda$  = 254 nm):  $t_R$  = 14.382 min (minor), 17.281 min (major).

**(3*S*,7'*S*)-7'-benzyl-1-hexylspiro[indoline-3,8'-[1,3]dioxolo[4,5-*g*]chromene]-2,6'(7'*H*)-dione (3t)**

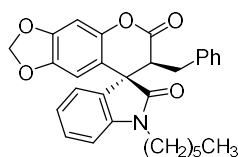

Reddish brown liquid, 40.1 mg, 83% yield, >20:1 dr, 91% ee,  $[\alpha]_D^{19} +236$  ( $c = 1.00$ ,  $\text{CH}_2\text{Cl}_2$ ), purified by column chromatography on silica gel (petroleum ether/EtOAc = 7:1).  $^1\text{H NMR}$  (400 MHz,  $\text{CDCl}_3$ )  $\delta$  7.44 – 7.39 (m, 1H), 7.17 – 7.06 (m, 5H), 7.01 – 6.98 (m, 3H), 6.61 (s, 1H), 5.90 (s, 1H), 5.84 (dd,  $J = 16.9$ , 1.1 Hz, 2H), 3.73 – 7.61 (m, 2H), 3.35 (dd,  $J = 8.2$ , 2.6 Hz, 1H), 3.17 (dd,  $J = 13.9$ , 8.2 Hz, 1H), 2.18 (dd,  $J = 13.8$ , 2.5 Hz, 1H), 1.71– 1.63 (m, 2H), 1.32 – 1.26 (m, 6H), 0.85 – 0.82 (m, 3H).  $^{13}\text{C NMR}$  (100 MHz,  $\text{CDCl}_3$ )  $\delta$  175.1, 168.0, 148.4, 147.1, 144.6, 144.2, 139.5, 129.9, 128.9, 128.3, 128.3, 126.3, 124.6, 123.6, 115.6, 109.3, 105.7, 101.9, 99.6, 54.6, 47.9, 40.3, 31.4, 31.3, 27.4, 26.5, 22.5, 14.0. HRMS (ESI):  $[\text{M}+\text{Na}]^+$  Calcd. for  $\text{C}_{30}\text{H}_{29}\text{NO}_5\text{Na}$ : 546.1078; Found: 546.1076. HPLC (Chiralpak IC column, *n*-hexane/*i*-PrOH = 50/50, flow rate = 1.0 mL/min,  $\lambda = 254$  nm):  $t_R = 33.486$  min (minor), 43.341 min (major).

**(3*S*,7'*S*)-1-allyl-7'-benzylspiro[indoline-3,8'-[1,3]dioxolo[4,5-*g*]chromene]-2,6'(7'*H*)-dione (3u)**

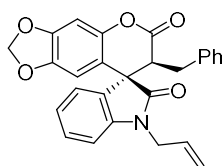

Yellow solid, 28.1 mg, 64% yield, >20:1 dr, 84% ee, m.p. 182.7 – 184.6 °C,  $[\alpha]_D^{19} +303$  ( $c = 1.00$ ,  $\text{CH}_2\text{Cl}_2$ ), purified by column chromatography on silica gel (petroleum ether/EtOAc = 7:1).  $^1\text{H NMR}$  (400 MHz,  $\text{CDCl}_3$ )  $\delta$  7.42 – 7.38 (m, 1H), 7.19 – 7.08 (m, 5H), 7.01 – 6.95 (m, 3H), 6.66 (s, 1H), 5.92 (s, 1H), 5.90 (s, 1H), 5.87 (s, 1H), 5.85 – 5.76 (m, 1H), 5.26 – 5.22 (m, 2H), 4.30 (d,  $J = 5.2$  Hz, 2H), 3.37 (dd,  $J = 8.3$ , 2.6 Hz, 1H), 3.18 (dd,  $J = 13.8$ , 8.3 Hz, 1H), 2.22 (dd,  $J = 13.8$ , 2.4 Hz, 1H).  $^{13}\text{C NMR}$  (100 MHz,  $\text{CDCl}_3$ )  $\delta$  174.9, 167.9, 148.5, 147.2, 144.3, 144.2, 139.4, 130.9, 129.8, 128.9, 128.3, 128.1, 126.3, 124.5, 123.8, 118.2, 115.4, 109.9, 105.7, 101.9, 99.7, 54.6, 48.0, 42.5, 31.4. HRMS (ESI):  $[\text{M}+\text{Na}]^+$  Calcd. for  $\text{C}_{27}\text{H}_{21}\text{NO}_5\text{Na}$ : 462.1311; Found: 462.1310. HPLC (Chiralpak AD–H column, *n*-hexane/*i*-PrOH = 48/52, flow rate = 1.0 mL/min,  $\lambda = 254$  nm):  $t_R = 9.128$  min (minor), 11.622 min (major).

**(3*S*,7'*S*)-7'-benzyl-1-tritylspiro[indoline-3,8'-[1,3]dioxolo[4,5-*g*]chromene]-2,6'(7'*H*)-dione (3v)**

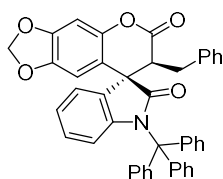

White solid, 33.4 mg, 52% yield, >20:1 dr, 91% ee, m.p. 278.9 – 280.3 °C,  $[\alpha]_D^{19} +115$  ( $c = 1.00$ ,  $\text{CH}_2\text{Cl}_2$ ), purified by column chromatography on silica gel (petroleum ether/EtOAc = 4:1).  $^1\text{H NMR}$  (400 MHz,  $\text{CDCl}_3$ )  $\delta$  7.46 – 7.43 (m, 6H), 7.25 – 7.15 (m, 9H), 7.08 – 6.99 (m, 4H), 6.98 – 6.91 (m, 2H), 6.73 – 6.71 (m, 2H), 6.64 (s, 1H), 6.44 (d,  $J = 8.1$  Hz, 1H), 6.08 (s, 1H), 5.97 (dd,  $J = 12.4$ , 1.3 Hz, 2H), 3.21 (dd,  $J = 7.8$ , 3.2 Hz, 1H), 2.87 (dd,  $J = 14.2$ , 7.8 Hz, 1H), 1.63 (dd,  $J = 14.2$ , 3.1 Hz, 1H).  $^{13}\text{C NMR}$  (100 MHz,  $\text{CDCl}_3$ )  $\delta$  176.2, 167.8, 148.3, 147.1, 144.7, 144.2, 141.8, 139.9, 128.9, 128.8, 128.6, 128.1, 127.8, 127.0, 126.0, 123.9, 123.3, 116.4, 115.7, 105.4, 101.9, 99.8, 74.9, 54.9, 48.1, 31.3. HRMS (ESI):  $[\text{M}+\text{Na}]^+$  Calcd. for  $\text{C}_{43}\text{H}_{31}\text{NO}_5\text{Na}$ :

664.2094; Found: 664.2094. HPLC (Chiralpak IC column, *n*-hexane/*i*-PrOH = 50/50, flow rate = 1.0 mL/min,  $\lambda = 254$  nm):  $t_R = 10.506$  min (minor), 15.852 min (major).

**(3*S*,7'*S*)-1-benzyl-7'-(2-fluorobenzyl)spiro[indoline-3,8'-[1,3]dioxolo[4,5-*g*]chromene]-2,6'(7'*H*)-dione**  
**(4a)**

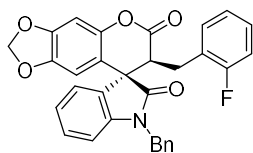

White solid, 35.0 mg, 69% yield, 5:1 dr, 91% ee, m.p. 105.2 – 106.7 °C,  $[\alpha]_D^{19} +254$  ( $c = 1.00$ , CH<sub>2</sub>Cl<sub>2</sub>), purified by column chromatography on silica gel (petroleum ether/EtOAc = 5:1). <sup>1</sup>H NMR (400 MHz, CDCl<sub>3</sub>)  $\delta$  7.34 – 7.25 (m, 6H, major + minor), 7.22 – 7.05 (m, 4H, major + minor), 6.99 – 6.80 (m, 3H, major + minor), 6.68 (s, 1H), 5.93 – 5.89 (m, 3H, major + minor), 4.95 – 4.82 (m, 2H, major + minor), 3.56 (dd,  $J = 8.7, 3.3$  Hz, 1H, major), 3.39 (dd,  $J = 8.3, 2.5$  Hz, 1H, minor), 3.22 (dd,  $J = 13.8, 8.2$  Hz, 1H, minor), 3.10 (dd,  $J = 13.9, 8.8$  Hz, 1H, major), 2.40 (dd,  $J = 13.9, 2.9$  Hz, 1H, major), 2.21 (d,  $J = 13.9, 2.0$  Hz, 1H, minor). <sup>13</sup>C NMR (100 MHz, CDCl<sub>3</sub>)  $\delta$  (major + minor) 175.4, 168.0, 167.8, 162.2, 159.7, 148.5, 147.2, 147.1, 144.3, 144.2, 143.9, 139.4, 135.4, 132.3, 132.3, 129.8, 129.7, 129.0, 128.9, 128.3, 128.3, 128.2, 128.1, 128.0, 127.6, 127.5, 126.3, 125.9, 125.8, 124.9, 124.5, 123.9, 123.9, 123.8, 123.7, 115.5, 115.5, 114.9, 114.7, 110.1, 109.8, 105.7, 101.9, 99.7, 54.6, 48.1, 45.7, 44.1, 31.4, 29.7, 26.0. <sup>19</sup>F NMR (376 MHz, CDCl<sub>3</sub>)  $\delta$  –117.20 (s). HRMS (ESI)  $m/z$ : [M+Na]<sup>+</sup> Calcd. for C<sub>31</sub>H<sub>22</sub>FNO<sub>5</sub>Na: 530.1374; Found: 530.1374. HPLC (Chiralpak IC column, *n*-hexane/*i*-PrOH = 40/60, flow rate = 1.0 mL/min,  $\lambda = 254$  nm):  $t_R = 41.119$  min (minor), 56.525 min (major).

**(3*S*,7'*S*)-1-benzyl-7'-(2-chlorobenzyl)spiro[indoline-3,8'-[1,3]dioxolo[4,5-*g*]chromene]-2,6'(7'*H*)-dione**  
**(4b)**

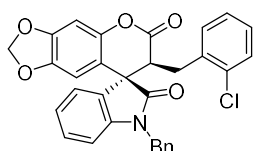

White solid, 37.7 mg, 72% yield, 10:1 dr, >99% ee, m.p. 216.4 – 217.6 °C,  $[\alpha]_D^{19} +285$  ( $c = 1.00$ , CH<sub>2</sub>Cl<sub>2</sub>), purified by column chromatography on silica gel (petroleum ether/EtOAc = 5:1). <sup>1</sup>H NMR (400 MHz, CDCl<sub>3</sub>)  $\delta$  7.33 – 7.22 (m, 6H, major + minor), 7.16 – 7.09 (m, 3H, major + minor), 7.05 – 6.96 (m, 3H, major + minor), 6.87 – 6.82 (m, 1H, major + minor), 6.69 (s, 1H), 5.92 – 5.90 (m, 3H, major + minor), 4.98 – 4.82 (m, 2H, major + minor), 3.73 (dd,  $J = 8.5, 4.4$  Hz, 1H, major), 3.39 (dd,  $J = 8.3, 2.8$  Hz, 1H, minor), 3.28 – 3.20 (m, 1H, major + minor), 2.49 (dd,  $J = 14.1, 4.3$  Hz, 1H, major), 2.21 (dd,  $J = 13.8, 2.6$  Hz, 1H, minor). <sup>13</sup>C NMR (100 MHz, CDCl<sub>3</sub>)  $\delta$  (major + minor) 175.4, 167.6, 148.5, 147.2, 144.2, 143.9, 136.0, 135.4, 133.5, 132.7, 129.7, 129.1, 129.0, 128.9, 128.3, 128.0, 127.9, 127.5, 127.4, 127.4, 126.5, 125.4, 123.4, 115.4, 109.8, 105.7, 101.9, 99.7, 54.6, 44.6, 44.2, 30.3. HRMS (ESI): [M+Na]<sup>+</sup> Calcd. for C<sub>31</sub>H<sub>22</sub>ClNO<sub>5</sub>Na: 546.1078;

Found: 546.1075. HPLC (Chiralpak IC column, *n*-hexane/*i*-PrOH = 50/50, flow rate = 1.0 mL/min,  $\lambda$  = 254 nm):  $t_R$  = 38.842 min (major).

**(3*S*,7'*S*)-1-benzyl-7'-(2-bromobenzyl)spiro[indoline-3,8'-[1,3]dioxolo[4,5-*g*]chromene]-2,6'(7'*H*)-dione (4c)**

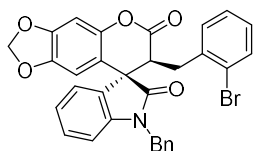

White solid, 35.8 mg, 63% yield, >20:1 dr, 92% ee, m.p. 222.2 – 224.0 °C,  $[\alpha]_D^{19}$  +176 ( $c$  = 1.00, CH<sub>2</sub>Cl<sub>2</sub>), purified by column chromatography on silica gel (petroleum ether/EtOAc = 5:1). <sup>1</sup>H NMR (400 MHz, CDCl<sub>3</sub>)  $\delta$  7.35 – 7.21 (m, 7H), 7.07 – 6.91 (m, 5H), 6.83 (d,  $J$  = 7.9 Hz, 1H), 6.70 (s, 1H), 5.92 – 5.90 (m, 3H), 4.97 (d,  $J$  = 15.5 Hz, 1H), 4.87 (d,  $J$  = 15.4 Hz, 1H), 3.79 (dd,  $J$  = 8.0, 4.9 Hz, 1H), 3.32 (dd,  $J$  = 14.4, 8.1 Hz, 1H), 2.50 (dd,  $J$  = 14.4, 4.9 Hz, 1H). <sup>13</sup>C NMR (100 MHz, CDCl<sub>3</sub>)  $\delta$  175.4, 167.6, 148.5, 147.1, 144.3, 143.8, 137.6, 135.4, 132.6, 132.4, 129.7, 129.0, 128.1, 128.0, 127.6, 127.3, 127.1, 125.4, 123.9, 123.4, 115.4, 109.8, 105.7, 101.9, 99.7, 54.5, 44.6, 44.2, 32.6. HRMS (ESI): [M+Na]<sup>+</sup> Calcd. for C<sub>31</sub>H<sub>22</sub>BrNO<sub>5</sub>Na: 590.0573; Found: 590.0582. HPLC (Chiralpak IC column, *n*-hexane/*i*-PrOH = 50/50, flow rate = 1.0 mL/min,  $\lambda$  = 254 nm):  $t_R$  = 26.192 min (minor), 39.859 min (major).

**(3*S*,7'*S*)-1-benzyl-7'-(2-methylbenzyl)spiro[indoline-3,8'-[1,3]dioxolo[4,5-*g*]chromene]-2,6'(7'*H*)-dione (4d)**

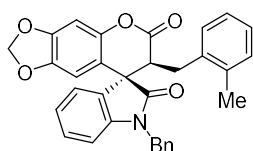

White solid, 48.3 mg, 96% yield, >20:1 dr, 95% ee, m.p. 224.7 – 225.8 °C,  $[\alpha]_D^{19}$  +185 ( $c$  = 1.00, CH<sub>2</sub>Cl<sub>2</sub>), purified by column chromatography on silica gel (petroleum ether/EtOAc = 5:1). <sup>1</sup>H NMR (400 MHz, CDCl<sub>3</sub>)  $\delta$  7.32 – 7.23 (m, 6H), 7.08 – 7.02 (m, 2H), 6.98 – 6.86 (m, 5H), 6.68 (s, 1H), 5.93 (s, 1H), 5.90 (s, 1H), 5.88 (s, 1H), 5.00 (d,  $J$  = 15.5 Hz, 1H), 4.82 (d,  $J$  = 15.5 Hz, 1H), 3.47 (dd,  $J$  = 8.3, 3.1 Hz, 1H), 3.25 (dd,  $J$  = 14.5, 8.4 Hz, 1H), 2.20 (dd,  $J$  = 14.5, 3.0 Hz, 1H), 2.04 (s, 3H). <sup>13</sup>C NMR (100 MHz, CDCl<sub>3</sub>)  $\delta$  175.4, 167.7, 148.5, 147.3, 144.3, 144.0, 137.2, 136.1, 135.4, 130.2, 129.8, 129.2, 129.0, 128.0, 128.0, 127.6, 126.3, 125.8, 124.8, 123.7, 115.3, 110.0, 105.8, 101.9, 99.7, 54.7, 46.5, 44.2, 28.4, 19.6. HRMS (ESI): [M+Na]<sup>+</sup> Calcd. for C<sub>32</sub>H<sub>25</sub>NO<sub>5</sub>Na: 526.1624; Found: 526.1605. HPLC (Chiralpak IC column, *n*-hexane/*i*-PrOH = 30/70, flow rate = 1.0 mL/min,  $\lambda$  = 254 nm):  $t_R$  = 22.512 min (minor), 28.566 min (major).

**(3*S*,7'*S*)-1-benzyl-7'-(2-methoxybenzyl)spiro[indoline-3,8'-[1,3]dioxolo[4,5-*g*]chromene]-2,6'(7'*H*)-dione (4e)**

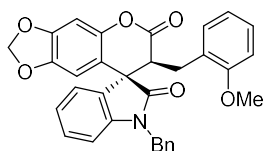

Yellow solid, 41.0 mg, 79% yield, >20:1 dr, 95% ee, m.p. 227.4 – 229.1 °C,  $[\alpha]_D^{19} +290$  ( $c = 1.00$ ,  $\text{CH}_2\text{Cl}_2$ ), purified by column chromatography on silica gel (petroleum ether/EtOAc = 3:1).  $^1\text{H NMR}$  (400 MHz,  $\text{CDCl}_3$ )  $\delta$  7.34 – 7.23 (m, 6H), 7.16 – 7.03 (m, 4H), 6.80 (d,  $J = 7.9$  Hz, 1H), 6.73 (t,  $J = 7.4$  Hz, 1H), 6.67 – 6.64 (m, 2H), 5.91 (s, 2H), 5.89 (s, 1H), 4.95 (d,  $J = 15.5$  Hz, 1H), 4.86 (d,  $J = 15.5$  Hz, 1H), 3.67 – 3.64 (m, 4H), 3.05 (dd,  $J = 13.5, 8.6$  Hz, 1H), 2.40 (dd,  $J = 13.5, 3.4$  Hz, 1H).  $^{13}\text{C NMR}$  (100 MHz,  $\text{CDCl}_3$ )  $\delta$  175.6, 168.1, 157.0, 148.4, 147.3, 144.1, 144.0, 135.5, 132.1, 129.5, 128.9, 128.1, 127.9, 127.7, 127.5, 126.9, 125.2, 123.0, 120.3, 115.8, 109.7, 109.6, 105.7, 101.8, 99.6, 54.7, 54.7, 44.7, 44.1, 27.5. HRMS (ESI):  $[\text{M}+\text{Na}]^+$  Calcd. for  $\text{C}_{32}\text{H}_{25}\text{NO}_6\text{Na}$ : 542.1574; Found: 542.1573. HPLC (Chiralpak IC column,  $n$ -hexane/ $i$ -PrOH = 40/60, flow rate = 1.0 mL/min,  $\lambda = 254$  nm):  $t_R = 30.027$  min (minor), 44.550 min (major).

**(3S,7'S)-1-benzyl-7'-(3-chlorobenzyl)spiro[indoline-3,8'-[1,3]dioxolo[4,5-g]chromene]-2,6'(7'H)-dione (4f)**

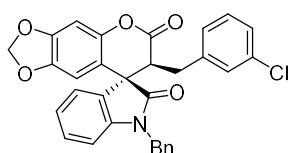

White solid, 39.8 mg, 76% yield, 4:1 dr, 91% ee, m.p. 171.6 – 172.9 °C,  $[\alpha]_D^{19} +222$  ( $c = 1.00$ ,  $\text{CH}_2\text{Cl}_2$ ), purified by column chromatography on silica gel (petroleum ether/EtOAc = 5:1).  $^1\text{H NMR}$  (400 MHz,  $\text{CDCl}_3$ )  $\delta$  (major + minor) 7.37 – 7.23 (m, 6H), 7.18 – 7.01 (m, 4H), 7.01 – 6.83 (m, 2H), 6.79 (s, 1H), 6.69 (d,  $J = 2.4$  Hz, 1H), 6.03 – 5.75 (m, 3H), 4.95 – 4.78 (m, 2H), 3.38 (dd,  $J = 7.5, 3.4$  Hz, 1H), 3.22 (dd,  $J = 14.0, 7.8$  Hz, 1H), 2.20 (dd,  $J = 14.0, 3.2$  Hz, 1H).  $^{13}\text{C NMR}$  (100 MHz,  $\text{CDCl}_3$ )  $\delta$  (major + minor) 175.3, 175.2, 167.9, 167.8, 148.6, 148.5, 147.2, 147.1, 144.4, 144.3, 144.2, 144.1, 141.3, 139.4, 135.4, 133.9, 130.0, 129.8, 129.5, 129.0, 129.0, 128.9, 128.3, 128.1, 128.0, 128.0, 127.8, 127.6, 127.5, 127.1, 126.5, 126.3, 124.5, 123.8, 115.5, 115.4, 110.1, 110.0, 105.7, 105.6, 101.9, 101.9, 99.8, 54.6, 54.4, 48.1, 47.8, 44.1, 31.4, 31.3. HRMS (ESI):  $[\text{M}+\text{Na}]^+$  Calcd. for  $\text{C}_{31}\text{H}_{22}\text{ClNO}_5\text{Na}$ : 546.1078; Found: 546.1077. HPLC (Chiralpak IC column,  $n$ -hexane/ $i$ -PrOH = 50/50, flow rate = 1.0 mL/min,  $\lambda = 254$  nm):  $t_R = 27.774$  min (minor), 30.624 min (major).

**(3S,7'S)-1-benzyl-7'-(3-bromobenzyl)spiro[indoline-3,8'-[1,3]dioxolo[4,5-g]chromene]-2,6'(7'H)-dione (4g)**

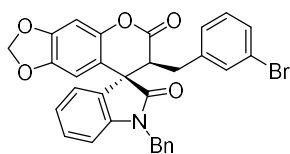

White solid, 41.5 mg, 73% yield, >20:1 dr, 97% ee, m.p. 219.1 – 220.7 °C,  $[\alpha]_D^{19} +268$  ( $c = 1.00$ ,  $\text{CH}_2\text{Cl}_2$ ), purified by column chromatography on silica gel (petroleum ether/EtOAc = 5:1).  $^1\text{H NMR}$  (400 MHz,  $\text{CDCl}_3$ )

$\delta$  7.33 – 7.24 (m, 6H), 7.15 – 7.07 (m, 5H), 6.98 – 6.96 (m, 2H), 6.86 (d,  $J$  = 7.9 Hz, 1H), 6.67 (s, 1H), 5.92 (s, 1H), 5.91 – 5.88 (m, 2H), 4.90 (d,  $J$  = 15.5 Hz, 1H), 4.83 (d,  $J$  = 15.6 Hz, 1H), 3.39 (dd,  $J$  = 8.2, 2.8 Hz, 1H), 3.22 (dd,  $J$  = 13.8, 8.3 Hz, 1H), 2.21 (dd,  $J$  = 13.9, 2.6 Hz, 1H).  $^{13}\text{C}$  NMR (100 MHz,  $\text{CDCl}_3$ )  $\delta$  175.3, 167.9, 148.5, 147.2, 144.3, 144.2, 139.4, 135.4, 129.8, 128.9, 128.9, 128.3, 128.1, 128.0, 127.5, 126.3, 124.5, 123.8, 115.5, 110.0, 105.7, 101.9, 99.7, 54.6, 48.1, 44.1, 31.4. HRMS (ESI):  $[\text{M}+\text{Na}]^+$  Calcd. for  $\text{C}_{31}\text{H}_{22}\text{BrNO}_5\text{Na}$ : 590.0573; Found: 590.0573. HPLC (Chiralpak IC column, *n*-hexane/*i*-PrOH = 40/60, flow rate = 1.0 mL/min,  $\lambda$  = 254 nm):  $t_{\text{R}}$  = 27.388 min (minor), 34.310 min (major).

**(3*S*,7'*S*)-1-benzyl-7'-(4-fluorobenzyl)spiro[indoline-3,8'-[1,3]dioxolo[4,5-*g*]chromene]-2,6'(7'*H*)-dione (4h)**

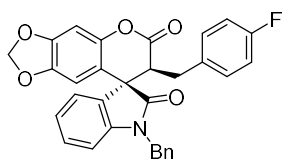

White solid, 38.1 mg, 75% yield, >20:1 dr, 99% ee, m.p. 132.2– 134.1 °C,  $[\alpha]_{\text{D}}^{20}$  +36 ( $c$  = 1.00,  $\text{CH}_2\text{Cl}_2$ ), purified by column chromatography on silica gel (petroleum ether/EtOAc = 5:1).  $^1\text{H}$  NMR (400 MHz,  $\text{CDCl}_3$ )  $\delta$  7.34 – 7.25 (m, 6H), 7.15 – 7.10 (m, 2H), 6.93 – 6.79 (m, 5H), 6.69 (s, 1H), 5.92 – 5.90 (m, 3H), 4.88 (d,  $J$  = 15.6 Hz, 1H), 4.84 (d,  $J$  = 15.6 Hz, 1H), 3.34 (dd,  $J$  = 8.1, 2.8 Hz, 1H), 3.19 (dd,  $J$  = 14.0, 8.2 Hz, 1H), 2.20 (dd,  $J$  = 14.0, 2.7 Hz, 1H).  $^{13}\text{C}$  NMR (100 MHz,  $\text{CDCl}_3$ )  $\delta$  175.2, 167.9, 162.7, 160.2, 148.5, 147.1, 144.3, 144.2, 135.3, 135.0, 135.0, 130.5, 130.4, 129.9, 129.0, 128.1, 128.0, 127.5, 124.4, 123.8, 115.4, 115.1, 114.9, 110.1, 105.6, 101.9, 99.8, 54.5, 48.2, 44.1, 30.7.  $^{19}\text{F}$  NMR (376 MHz,  $\text{CDCl}_3$ )  $\delta$  –116.69 (s). HRMS (ESI):  $[\text{M}+\text{Na}]^+$  Calcd. for  $\text{C}_{31}\text{H}_{22}\text{FNO}_5$ : 530.1374; Found: 530.1386. HPLC (Chiralpak IC column, *n*-hexane/*i*-PrOH = 50/50, flow rate = 1.0 mL/min,  $\lambda$  = 254 nm):  $t_{\text{R}}$  = 25.812 min (minor), 30.158 min (major).

**(3*S*,7'*S*)-1-benzyl-7'-(4-chlorobenzyl)spiro[indoline-3,8'-[1,3]dioxolo[4,5-*g*]chromene]-2,6'(7'*H*)-dione (4i)**

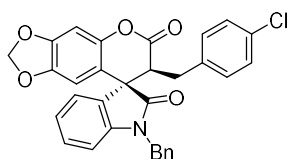

White solid, 44.0 mg, 84% yield, >20:1 dr, 90% ee, m.p. 219.6 – 220.6 °C,  $[\alpha]_{\text{D}}^{19}$  +231 ( $c$  = 1.00,  $\text{CH}_2\text{Cl}_2$ ), purified by column chromatography on silica gel (petroleum ether/EtOAc = 5:1).  $^1\text{H}$  NMR (400 MHz,  $\text{CDCl}_3$ )  $\delta$  7.31 – 7.25 (m, 6H), 7.14 – 7.06 (m, 4H), 6.87 (d,  $J$  = 8.0 Hz, 3H), 6.67 (s, 1H), 5.91 (s, 2H), 5.88 (s, 1H), 4.89 – 4.81 (m, 2H), 3.34 (dd,  $J$  = 7.9, 2.6 Hz, 1H), 3.17 (dd,  $J$  = 13.9, 8.1 Hz, 1H), 2.20 (dd,  $J$  = 13.8, 2.2 Hz, 1H).  $^{13}\text{C}$  NMR (100 MHz,  $\text{CDCl}_3$ )  $\delta$  175.2, 167.9, 148.6, 147.1, 144.4, 144.1, 137.8, 135.3, 132.1, 130.3, 129.9, 129.0, 128.3, 128.0, 128.0, 127.5, 124.4, 123.9, 115.4, 110.1, 105.6, 101.9, 99.7, 54.5, 47.9, 44.1, 30.9. HRMS (ESI):  $[\text{M}+\text{Na}]^+$  Calcd. for  $\text{C}_{31}\text{H}_{22}\text{ClNO}_5\text{Na}$ : 546.1078; Found: 546.1078. HPLC (Chiralpak IC



column, *n*-hexane/*i*-PrOH = 50/50, flow rate = 1.0 mL/min,  $\lambda$  = 254 nm):  $t_R$  = 26.579 min (minor), 32.572 min (major).

**(3*S*,7'*S*)-1-benzyl-7'-(4-bromobenzyl)spiro[indoline-3,8'-[1,3]dioxolo[4,5-*g*]chromene]-2,6'(7'*H*)-dione (4j)**

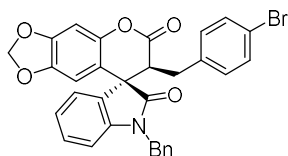

White solid, 48.9 mg, 86% yield, >20:1 dr, 93% ee, m.p. 205.3 – 206.4 °C,  $[\alpha]_D^{19}$  +243 (c = 1.00, CH<sub>2</sub>Cl<sub>2</sub>), purified by column chromatography on silica gel (petroleum ether/EtOAc = 5:1). <sup>1</sup>H NMR (400 MHz, CDCl<sub>3</sub>)  $\delta$  7.34 – 7.21 (m, 8H), 7.14 – 7.08 (m, 2H), 6.87 (d, *J* = 7.9 Hz, 1H), 6.81 (d, *J* = 8.3 Hz, 2H), 6.67 (s, 1H), 5.91 – 5.88 (m, 3H), 4.89 – 4.80 (m, 2H), 3.34 (dd, *J* = 8.1, 3.0 Hz, 1H), 3.16 (dd, *J* = 14.0, 8.1 Hz, 1H), 2.19 (dd, *J* = 14.0, 2.9 Hz, 1H). <sup>13</sup>C NMR (100 MHz, CDCl<sub>3</sub>)  $\delta$  175.2, 167.8, 148.6, 147.1, 144.4, 144.1, 138.3, 135.3, 131.3, 130.7, 129.9, 129.0, 128.0, 127.9, 127.5, 124.5, 123.9, 120.2, 115.4, 110.1, 105.6, 101.9, 99.7, 54.5, 47.9, 44.1, 31.0. HRMS (ESI): [M+Na]<sup>+</sup> Calcd. for C<sub>31</sub>H<sub>22</sub>BrNO<sub>5</sub>Na: 590.0573; Found: 590.0577. HPLC (Chiralpak IC column, *n*-hexane/*i*-PrOH = 50/50, flow rate = 1.0 mL/min,  $\lambda$  = 254 nm):  $t_R$  = 28.066 min (minor), 34.420 min (major).

**(3*S*,7'*S*)-1-benzyl-7'-(4-methylbenzyl)spiro[indoline-3,8'-[1,3]dioxolo[4,5-*g*]chromene]-2,6'(7'*H*)-dione (4k)**

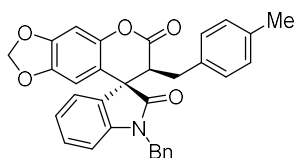

Yellow solid, 48.3 mg, 96% yield, >20:1 dr, 91% ee, m.p. 211.3 – 212.6 °C,  $[\alpha]_D^{19}$  +278 (c = 1.00, CH<sub>2</sub>Cl<sub>2</sub>), purified by column chromatography on silica gel (petroleum ether/EtOAc = 5:1). <sup>1</sup>H NMR (400 MHz, CDCl<sub>3</sub>)  $\delta$  7.33 – 7.22 (m, 6H), 7.13 – 7.09 (m, 2H), 6.94 (d, *J* = 7.9 Hz, 2H), 6.88 – 6.84 (m, 3H), 6.66 (s, 1H), 5.92 (s, 1H), 5.89 – 5.86 (m, 2H), 4.88 (d, *J* = 15.6 Hz, 1H), 4.83 (d, *J* = 15.6 Hz, 1H), 3.35 (dd, *J* = 8.3, 2.5 Hz, 1H), 3.16 (dd, *J* = 13.9, 8.4 Hz, 1H), 2.23 (s, 3H), 2.18 (dd, *J* = 13.9, 2.3 Hz, 1H). <sup>13</sup>C NMR (100 MHz, CDCl<sub>3</sub>)  $\delta$  175.4, 168.0, 148.5, 147.2, 144.3, 144.2, 136.4, 135.8, 135.4, 129.8, 129.0, 129.0, 128.8, 128.2, 128.0, 127.5, 124.5, 123.8, 115.5, 110.0, 105.7, 101.9, 99.7, 54.6, 48.2, 44.1, 31.0, 21.0. HRMS (ESI): [M+Na]<sup>+</sup> Calcd. for C<sub>32</sub>H<sub>25</sub>NO<sub>5</sub>Na: 526.1624; Found: 526.1624. HPLC (Chiralpak IC column, *n*-hexane/*i*-PrOH = 30/70, flow rate = 1.0 mL/min,  $\lambda$  = 254 nm):  $t_R$  = 26.385 min (minor), 44.382 min (major).

**(3*S*,7'*S*)-1-benzyl-7'-(4-methoxybenzyl)spiro[indoline-3,8'-[1,3]dioxolo[4,5-*g*]chromene]-2,6'(7'*H*)-dione (4l)**

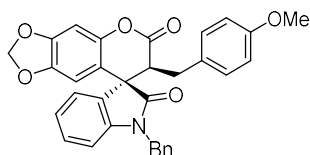

White solid, 47.8 mg, 92% yield, >20:1 dr, 96% ee, m.p. 131.1 – 132.6 °C,  $[\alpha]_D^{19}$  +222 ( $c = 1.00$ ,  $\text{CH}_2\text{Cl}_2$ ), purified by column chromatography on silica gel (petroleum ether/EtOAc = 4:1).  $^1\text{H}$  NMR (400 MHz,  $\text{CDCl}_3$ )  $\delta$  7.34 – 7.23 (m, 7H), 7.13 (d,  $J = 4.2$  Hz, 2H), 6.90 – 6.84 (m, 3H), 6.69 – 6.66 (m, 3H), 5.91 (s, 1H), 5.90 (dd,  $J = 8.8, 1.2$  Hz, 2H), 4.88 (d,  $J = 15.6$  Hz, 1H), 4.83 (d,  $J = 15.6$  Hz, 1H), 3.72 (s, 3H), 3.33 (dd,  $J = 8.2, 2.6$  Hz, 1H), 3.14 (dd,  $J = 13.9, 8.3$  Hz, 1H), 2.14 (dd,  $J = 13.9, 2.5$  Hz, 1H).  $^{13}\text{C}$  NMR (100 MHz,  $\text{CDCl}_3$ )  $\delta$  175.3, 168.0, 158.1, 148.5, 147.2, 144.2, 144.2, 135.4, 131.5, 130.0, 129.8, 128.9, 128.3, 127.9, 127.4, 124.4, 123.8, 115.6, 113.7, 110.0, 105.7, 101.9, 99.7, 55.2, 54.6, 48.3, 44.1, 30.6. HRMS (ESI):  $[\text{M}+\text{Na}]^+$  Calcd. for  $\text{C}_{32}\text{H}_{25}\text{NO}_6\text{Na}$ : 542.1574; Found: 542.1571. HPLC (Chiralpak IC column, *n*-hexane/*i*-PrOH = 50/50, flow rate = 1.0 mL/min,  $\lambda = 254$  nm):  $t_R = 40.512$  min (minor), 62.047 min (major).

**(3S,7'S)-1-benzyl-7'-(3,4-dimethoxybenzyl)spiro[indoline-3,8'-[1,3]dioxolo[4,5-g]chromene]-2,6'(7'H)-dione (4m)**

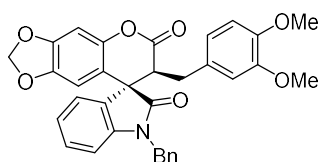

White solid, 41.7 mg, 76% yield, >20:1 dr, 91% ee, m.p. 175.6 – 176.7 °C,  $[\alpha]_D^{19}$  +167 ( $c = 1.00$ ,  $\text{CH}_2\text{Cl}_2$ ), purified by column chromatography on silica gel (petroleum ether/EtOAc = 3:1).  $^1\text{H}$  NMR (400 MHz,  $\text{CDCl}_3$ )  $\delta$  7.34 – 7.25 (m, 6H), 7.10 – 7.05 (m, 2H), 6.85 (d,  $J = 7.9$  Hz, 1H), 6.69 (s, 1H), 6.63 (d,  $J = 8.0$  Hz, 1H), 6.46 – 6.43 (m, 2H), 5.92 – 5.90 (m, 3H), 4.91 (d,  $J = 15.5$  Hz, 1H), 4.80 (d,  $J = 15.5$  Hz, 1H), 3.79 (s, 3H), 3.68 (s, 3H), 3.37 (dd,  $J = 7.4, 3.2$  Hz, 1H), 3.24 (dd,  $J = 14.0, 7.4$  Hz, 1H), 2.19 (dd,  $J = 14.0, 3.2$  Hz, 1H).  $^{13}\text{C}$  NMR (100 MHz,  $\text{CDCl}_3$ )  $\delta$  175.3, 168.2, 148.5, 148.5, 147.4, 147.1, 144.3, 144.1, 135.4, 132.1, 129.7, 129.0, 128.1, 128.0, 127.5, 124.6, 123.6, 120.5, 115.6, 112.4, 111.0, 110.0, 105.6, 101.9, 99.7, 55.9, 55.6, 54.5, 48.3, 44.1, 31.1. HRMS (ESI):  $[\text{M}+\text{Na}]^+$  Calcd. for  $\text{C}_{33}\text{H}_{27}\text{NO}_7\text{Na}$ : 572.1679; Found: 572.1693. HPLC (Chiralpak AD-H column, *n*-hexane/*i*-PrOH = 60/40, flow rate = 1.0 mL/min,  $\lambda = 254$  nm):  $t_R = 30.667$  min (minor), 35.297 min (major).

**(3S,7'S)-1-benzyl-7'-(furan-2-ylmethyl)spiro[indoline-3,8'-[1,3]dioxolo[4,5-g]chromene]-2,6'(7'H)-dione (4n)**

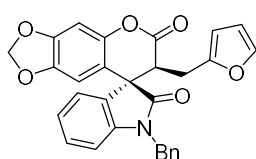

White solid, 32.6 mg, >20:1 dr, 68% yield, 89% ee, m.p. 103.6 – 104.4 °C,  $[\alpha]_D^{20}$  –132 ( $c = 1.00$ ,  $\text{CH}_2\text{Cl}_2$ ), purified by column chromatography on silica gel (petroleum ether/EtOAc = 5:1).  $^1\text{H}$  NMR (600 MHz,  $\text{CDCl}_3$ )

$\delta$  7.34 – 7.23 (m, 6H), 7.11 (s, 1H), 7.08 – 7.04 (m, 2H), 6.81 (d,  $J = 7.9$  Hz, 1H), 6.71 (d,  $J = 1.0$  Hz, 1H), 6.06 – 6.05 (m, 1H), 5.93 – 5.88 (m, 3H), 5.70 (d,  $J = 3.1$  Hz, 1H), 4.90 (d,  $J = 15.5$  Hz, 1H), 4.82 (d,  $J = 15.5$  Hz, 1H), 3.62 – 3.60 (m, 1H), 3.30 (dd,  $J = 15.3, 7.4$  Hz, 1H), 2.34 (dd,  $J = 15.3, 4.7$  Hz, 1H).  $^{13}\text{C}$  NMR (151 MHz,  $\text{CDCl}_3$ )  $\delta$  175.2, 167.5, 151.7, 148.5, 147.1, 144.3, 143.8, 140.8, 135.4, 129.5, 128.9, 128.0, 127.8, 127.5, 124.4, 123.9, 115.5, 110.5, 109.7, 106.9, 105.6, 101.9, 99.8, 54.1, 44.4, 44.1, 24.6. HRMS (ESI)  $m/z$ :  $[\text{M}+\text{H}]^+$  Calcd. for  $\text{C}_{29}\text{H}_{22}\text{NO}_6$ : 480.1442; Found: 480.1439. HPLC (Chiralpak AD–H column, *n*-hexane/*i*-PrOH = 50/50, flow rate = 1.0 mL/min,  $\lambda = 254$  nm):  $t_{\text{R}} = 15.442$  min (minor), 41.772 min (major).

**(3*S*,7'*S*)-1-benzyl-7'-(thiophen-2-ylmethyl)spiro[indoline-3,8'-[1,3]dioxolo[4,5-*g*]chromene]-2,6'(7'*H*)-dione (4o)**

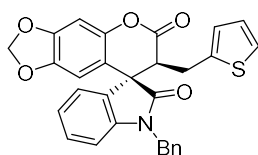

Deep red solid, 37.6 mg, >20:1 dr, 76% yield, 91% ee, m.p. 114.3 – 115.8 °C,  $[\alpha]_{\text{D}}^{20} +89$  ( $c = 0.5$ ,  $\text{CH}_2\text{Cl}_2$ ), purified by column chromatography on silica gel (petroleum ether/EtOAc = 5:1).  $^1\text{H}$  NMR (600 MHz,  $\text{CDCl}_3$ )  $\delta$  7.33 – 7.30 (m, 3H), 7.28 – 7.26 (m, 3H), 7.16 – 7.13 (m, 2H), 7.04 – 7.03 (m, 1H), 6.85 (d,  $J = 7.9$  Hz, 1H), 6.77 – 6.75 (m, 1H), 6.71 (s, 1H), 6.56 (d,  $J = 3.1$  Hz, 1H), 5.93 – 5.91 (m, 3H), 4.94 – 4.78 (m, 2H), 3.45 – 3.40 (m, 2H), 2.48 – 2.42 (m, 1H).  $^{13}\text{C}$  NMR (151 MHz,  $\text{CDCl}_3$ )  $\delta$  175.1, 167.7, 148.5, 147.1, 144.3, 144.1, 141.5, 135.3, 129.9, 129.0, 128.0, 127.7, 127.4, 126.7, 126.1, 124.5, 124.1, 123.9, 115.5, 110.0, 105.6, 101.9, 99.8, 54.3, 48.3, 44.1, 31.6, 26.0, 22.7, 14.1. HRMS (ESI)  $m/z$ :  $[\text{M}+\text{H}]^+$  Calcd. for  $\text{C}_{29}\text{H}_{22}\text{NO}_5\text{S}$ : 496.1213; Found: 496.1214. HPLC (Chiralpak AD–H column, *n*-hexane/*i*-PrOH = 35/65, flow rate = 1.0 mL/min,  $\lambda = 254$  nm):  $t_{\text{R}} = 14.424$  min (minor), 36.406 min (major).

**(3*S*,4*S*)-1',3-dibenzylspiro[benzo[*h*]chromene-4,3'-indoline]-2,2'(3*H*)-dione (4q)**

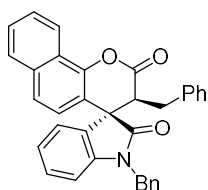

White solid, 48.7 mg, 98% yield, >20:1 dr, 98% ee, m.p. 107.1 – 108.2 °C,  $[\alpha]_{\text{D}}^{19} +246$  ( $c = 1.00$ ,  $\text{CH}_2\text{Cl}_2$ ), purified by column chromatography on silica gel (petroleum ether/EtOAc = 7:1).  $^1\text{H}$  NMR (400 MHz,  $\text{CDCl}_3$ )  $\delta$  8.32 (d,  $J = 7.8$  Hz, 1H), 7.74 – 7.72 (m, 1H), 7.56 – 7.48 (m, 2H), 7.40 (d,  $J = 8.6$  Hz, 1H), 7.35 – 7.22 (m, 6H), 7.16 – 7.07 (m, 5H), 7.02 (d,  $J = 7.5$  Hz, 2H), 6.90 (d,  $J = 7.9$  Hz, 1H), 6.52 (d,  $J = 8.6$  Hz, 1H), 4.91 (d,  $J = 15.6$  Hz, 1H), 4.86 (d,  $J = 15.6$  Hz, 1H), 3.55 (dd,  $J = 8.3, 2.6$  Hz, 1H), 3.31 (dd,  $J = 13.9, 8.4$  Hz, 1H), 2.31 (dd,  $J = 13.9, 2.2$  Hz, 1H).  $^{13}\text{C}$  NMR (100 MHz,  $\text{CDCl}_3$ )  $\delta$  175.3, 167.9, 147.9, 144.4, 139.5, 135.4, 134.3, 129.8, 129.0, 128.9, 128.4, 128.3, 128.0, 127.5, 127.4, 127.4, 126.8, 126.4, 124.5, 124.1, 124.0, 123.9, 123.0, 121.9, 117.7, 110.1, 55.2, 48.2, 44.2, 31.5. HRMS (ESI):  $[\text{M}+\text{H}]^+$  Calcd. for  $\text{C}_{34}\text{H}_{26}\text{NO}_3$ : 496.1907;

Found: 496.1903. HPLC (Chiralpak IC column, *n*-hexane/*i*-PrOH = 60/40, flow rate = 1.0 mL/min,  $\lambda$  = 254 nm)  $t_R$  = 17.716 min (minor), 26.064 min (major).

#### 4. Scale-up synthesis of product 3a

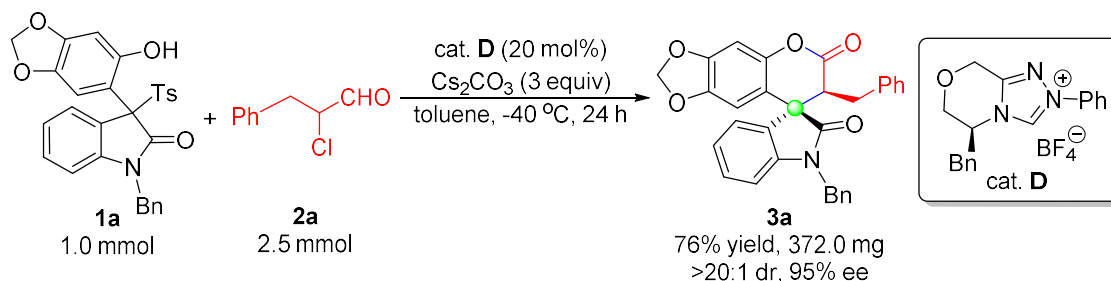

Under argon atmosphere, a flame-dried 50 mL Schlenk tube was charged with **1a** (513.6 mg, 1.0 mmol), **2a** (421.6 mg, 2.5 mmol, 2.5 equiv.),  $\text{Cs}_2\text{CO}_3$  (977.5 mg, 3.0 mmol, 3.0 equiv.) and Cat. **D** (76 mg, 0.02 mmol, 20 mol %). The tube was evacuated and backfilled with nitrogen for 3 times. Then, dry toluene (15 mL) was added to the mixture at  $-40^\circ\text{C}$ . The resulting solution was continuously stirred at  $-40^\circ\text{C}$  for 24 h (monitored by TLC). The reaction mixtures were filtrated through flash silica gels to remove the inorganic salt and the solvent was removed in *vacuo*. The crude residue was purified by column chromatography on silica gel (petroleum ether/ethyl acetate = 5:1) to obtain the product **3a** (372.0 mg, 76% yield, >20:1 dr, 95% ee).

#### 5. General procedure for the synthetic transformations of 3a

##### 5.1 General procedure for the synthesis of 5a

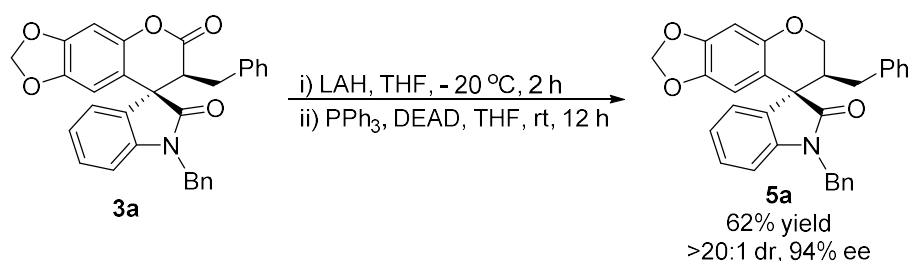

To a 25 mL Schlenk reaction flask equipped with a magnetic stir bar, which was added  $\text{LiAlH}_4$  (15.2 mg, 0.4 mmol, 2.0 equiv.). The flask was sealed, evacuated, and backfilled with argon three times using standard Schlenk techniques, dry THF (2.0 mL) was added *via* syringe at  $-20^\circ\text{C}$ . Then, a solution of **3a** (97.9 mg, 0.2 mmol) in THF (1.0 mL) was slowly added *via* syringe. The reaction mixture was stirred for 2 h. After completion of the reaction (monitored by TLC), the reaction mixture was quenched with wet  $\text{Na}_2\text{SO}_4$  solid. The mixture was stirred for 1 h, filtered by celite and washed with ethyl acetate. The combined organics were dried over  $\text{Na}_2\text{SO}_4$ , filtered, and concentrated under reduced pressure to afford the crude product which was used directly for next step.

To a 25 mL Schlenk reaction flask equipped with a magnetic stir bar, was added the above crude product ( $\sim 0.20$  mmol),  $\text{PPh}_3$  (94.3 mg, 0.36 mmol, 1.8 equiv.). The flask was sealed, evacuated, and backfilled with argon three times using standard Schlenk techniques. Then, dry THF (2.0 mL) and diethyl azodicarboxylate

(52.3 mg, 0.3 mmol, 3.0 equiv.) were added slowly at 0 °C. The reaction mixture was stirred at room temperature for 12 h. After completion of the reaction, the reaction mixture was concentrated under reduced pressure and the product was purified by column chromatography (petroleum ether/ethyl acetate = 10/1) to afford the product **5a** as a white solid (29.5 mg, 62% yield, >20:1 dr, 94% ee).

**(3*S*,7'*S*)-1,7'-dibenzyl-6',7'-dihydrospiro[indoline-3,8'-[1,3]dioxolo[4,5-*g*]chromen]-2-one (5a)**

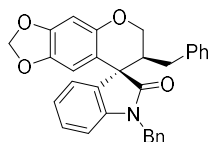

White solid, 29.5 mg, 62% yield, >20:1 dr, 94% ee, m.p. 82.9 – 84.1 °C,  $[\alpha]_D^{19} +182$  (c = 1.00, CH<sub>2</sub>Cl<sub>2</sub>), purified by column chromatography on silica gel (petroleum ether/EtOAc = 10:1). <sup>1</sup>H NMR (400 MHz, CDCl<sub>3</sub>) δ 7.36 – 7.29 (m, 4H), 7.27 – 7.19 (m, 4H), 7.17 – 7.07 (m, 3H), 6.95 (d, *J* = 7.1 Hz, 1H), 6.83 (d, *J* = 7.8 Hz, 1H), 6.42 (s, 1H), 5.79 – 5.77 (m, 3H), 5.00 – 4.91 (m, 2H), 4.79 (d, *J* = 11.2 Hz, 1H), 4.06 (dd, *J* = 10.9, 3.6 Hz, 1H), 2.68 – 2.60 (m, 3H), 2.34 – 2.21 (m, 2H). <sup>13</sup>C NMR (100 MHz, CDCl<sub>3</sub>) δ 177.8, 150.8, 147.9, 143.8, 141.9, 138.7, 136.0, 133.0, 128.9, 128.7, 128.5, 127.8, 127.5, 126.5, 123.7, 123.5, 112.7, 109.2, 106.5, 101.1, 99.0, 64.5, 52.6, 44.1, 42.9, 32.7. HRMS (ESI): [M+Na]<sup>+</sup> Calcd. for C<sub>31</sub>H<sub>25</sub>NO<sub>4</sub>Na: 498.1675; Found: 498.1675. HPLC (Chiralpak IC column, *n*-hexane/*i*-PrOH = 60/40, flow rate = 1.0 mL/min, λ = 254 nm): t<sub>R</sub> = 12.825 min (minor), 17.415 min (major).

**5.2 General procedure for the synthesis of 5b**

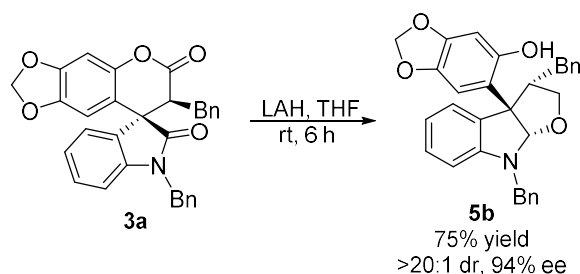

Under an argon atmosphere, a solution of LiAlH<sub>4</sub> (22.8 mg, 0.4 mmol, 6.0 equiv.) in anhydrous THF (1.0 mL) was added dropwise to a solution of **3a** (49.0 mg, 0.1 mmol) in anhydrous THF (1.0 mL) at 0 °C. The resulting mixture was stirred at room temperature under an argon atmosphere for 6 h. The reaction mixture was quenched with wet Na<sub>2</sub>SO<sub>4</sub> solid, filtered and extracted with ethyl acetate. The combined organic layers were dried over Na<sub>2</sub>SO<sub>4</sub>, filtered and concentrated *in vacuo*. The residue was purified by column chromatography (petroleum ether/ethyl acetate = 7/1) on silica to give the product **5b** as a white solid (35.8 mg, 75% yield, >20:1 dr, 94% ee).

**6-((3*S*,3*aS*,8*aS*)-3,8-dibenzyl-2,3,8,8*a*-tetrahydro-3*aH*-furo[2,3-*b*]indol-3*a*-yl)benzo[*d*][1,3]dioxol-5-ol (5b)**

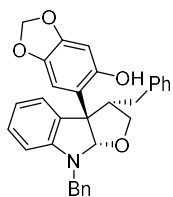

White solid, 35.8 mg, 75% yield, >20:1 dr, 94% ee, m.p. 56.1 – 57.9 °C,  $[\alpha]_D^{19}$  –30 ( $c = 1.00$ ,  $\text{CH}_2\text{Cl}_2$ ), purified by column chromatography on silica gel (petroleum ether/EtOAc = 7:1).  $^1\text{H}$  NMR (400 MHz,  $\text{CDCl}_3$ )  $\delta$  7.68 – 7.31 (dd,  $J = 16.1, 7.7$  Hz, 4H), 7.29 – 7.24 (m, 5H), 7.18 (t,  $J = 7.3$  Hz, 1H), 7.10 (d,  $J = 7.2$  Hz, 2H), 7.04 (t,  $J = 7.5$  Hz, 1H), 6.77 (t,  $J = 7.4$  Hz, 1H), 6.70 (s, 1H), 6.50 (s, 1H), 6.41 (s, 1H), 6.38 (d,  $J = 7.8$  Hz, 1H), 5.88 (d,  $J = 1.0$  Hz, 1H), 5.82 (d,  $J = 0.9$  Hz, 1H), 4.67 (d,  $J = 16.2$  Hz, 1H), 4.59 (d,  $J = 16.2$  Hz, 1H), 3.60 (d,  $J = 11.1$  Hz, 1H), 3.50 (d,  $J = 10.6$  Hz, 1H), 2.65 – 2.51 (m, 3H).  $^{13}\text{C}$  NMR (100 MHz,  $\text{CDCl}_3$ )  $\delta$  153.5, 149.0, 147.7, 142.2, 140.5, 137.7, 132.3, 129.1, 128.6, 128.5, 128.4, 127.3, 127.3, 126.2, 122.1, 121.7, 118.5, 106.3, 104.2, 103.3, 101.3, 93.8, 62.1, 60.7, 49.2, 47.9, 32.7. HRMS (ESI):  $[\text{M}+\text{Na}]^+$  Calcd. for  $\text{C}_{31}\text{H}_{27}\text{NO}_4\text{Na}$ : 500.1832; Found: 500.1832. HPLC (Chiralpak OD–H column, *n*-hexane/*i*-PrOH = 87/13, flow rate = 1.0 mL/min,  $\lambda = 254$  nm):  $t_R = 17.823$  min (minor), 22.594 min (major).

### 5.3 General procedure for the syntheses of **5c** and **5d**

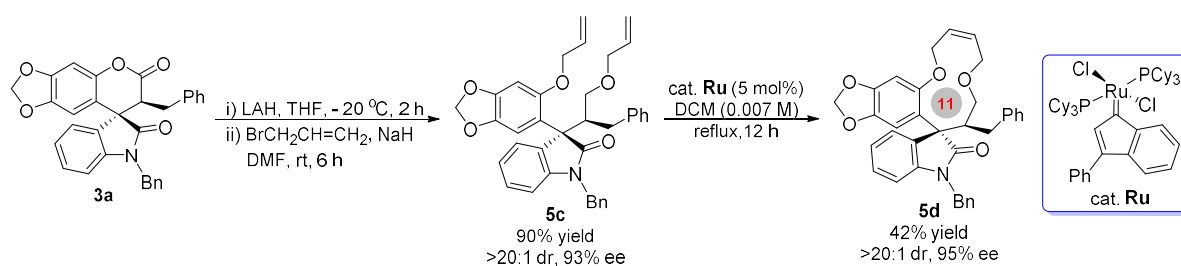

To a 25 mL Schlenk reaction flask equipped with a magnetic stir bar was added  $\text{LiAlH}_4$  (15.2 mg, 0.4 mmol, 2.0 equiv.). The flask was sealed, evacuated, and backfilled with argon three times using standard Schlenk techniques. Then, dry THF (2.0 mL) was added at  $-20$  °C and a solution of **3a** (97.9 mg, 0.2 mmol) in THF (1.0 mL) was added. The reaction mixture was stirred for 2 h. After completion of the reaction (monitored by TLC), the reaction mixture was quenched with wet  $\text{Na}_2\text{SO}_4$  solid and was stirred for 1 h. The mixture was filtered by celite and washed with ethyl acetate. The combined organics were dried over  $\text{Na}_2\text{SO}_4$ , filtered, and concentrated under reduced pressure to afford the crude product which was used directly for the next step.

To a solution of  $\text{NaH}$  (60%, 2.4 equiv.) in DMF (0.4 mL) was slowly added a solution of the compound **3a** (49.0 mg, 0.1 mmol) in DMF (0.6 mL) under the atmosphere of argon at 0 °C. The mixture was stirred for 1 h at 0 °C and then a solution of allyl bromide (36.3 mg, 0.3 mmol, 3.0 equiv.) in DMF (0.5 mL) was added dropwise. The mixture was stirred at room temperature for 6 h. After the reaction was completed, the reaction was quenched with saturated brine and extracted with ethyl acetate three times. The organic layer was concentrated under reduced pressure and the residue was purified by flash chromatography on silica gel

(petroleum ether/ethyl acetate= 6/1) to furnish the product **5c** (51.6 mg, 90% yield, >20:1 dr, 93% ee) as a colorless oil.

A stirred solution of **5c** (39 mg, 0.1 mmol) in toluene (15 mL) was degassed by three freeze-thaw cycles under argon atmosphere and Grubbs reagent Cat. Ru (4.6 mg, 0.005 mmol, 0.05 equiv.) was added at room temperature. The reaction mixture was degassed again by three freeze-thaw cycles and then was refluxed for 12 h. The reaction mixture was extracted with ethyl acetate three times. The organic layer was washed with water and saturated brine, dried over sodium sulfate, and concentrated *in vacuo*. The residue was purified by column chromatography on silica gel (petroleum ether/ethyl acetate = 10/1) to afford the product **5d** (24.0 mg, 44% yield, >20:1 dr, 94% ee) as a yellow oil.

**(S)-3-((S)-1-(allyloxy)-3-phenylpropan-2-yl)-3-(6-(allyloxy)benzo[d][1,3]dioxol-5-yl)-1-benzylindolin-2-one (5c)**

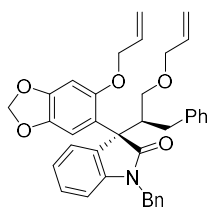

Colorless oil, 51.6 mg, 90% yield, >20:1 dr, 93% ee,  $[\alpha]_D^{19}$   $-81$  ( $c = 1.00$ ,  $\text{CH}_2\text{Cl}_2$ ), purified by column chromatography on silica gel (petroleum ether/EtOAc = 6:1).  $^1\text{H NMR}$  (400 MHz,  $\text{CDCl}_3$ )  $\delta$  7.45 (d,  $J = 7.3\text{Hz}$ , 2H), 7.33 – 7.19 (m, 4H), 7.15 – 7.05 (m, 4H), 6.95 – 6.93 (m, 3H), 6.86 – 6.82 (m, 1H), 6.74 (d,  $J = 7.8\text{ Hz}$ , 1H), 6.42 (s, 1H), 5.88 (s, 2H), 5.63 – 5.53 (m, 2H), 5.14 – 5.05 (m, 3H), 5.00 – 4.96 (m, 2H), 4.71 (d,  $J = 15.4\text{ Hz}$ , 1H), 4.13 – 4.02 (m, 2H), 3.91 (d,  $J = 8.7\text{ Hz}$ , 1H), 3.68 – 3.58 (m, 2H), 3.53 – 3.49 (m, 1H), 3.20 (s, 1H), 2.51 – 2.42 (m, 2H).  $^{13}\text{C NMR}$  (100 MHz,  $\text{CDCl}_3$ )  $\delta$  178.8, 152.1, 147.1, 143.7, 141.8, 140.9, 136.6, 134.9, 133.4, 133.0, 128.9, 128.7, 128.0, 128.0, 127.6, 127.5, 125.6, 123.7, 122.4, 121.5, 117.8, 116.3, 108.4, 108.3, 101.4, 97.4, 71.6, 71.4, 70.8, 56.9, 46.1, 44.5, 35.5. HRMS (ESI):  $[\text{M}+\text{Na}]^+$  Calcd. for  $\text{C}_{37}\text{H}_{35}\text{NO}_5\text{Na}$ : 596.2407; Found: 596.2407. HPLC (Chiralpak OD–H column, *n*-hexane/*i*-PrOH = 97/3, flow rate = 1.0 mL/min,  $\lambda = 254\text{ nm}$ ):  $t_R = 32.091\text{ min}$  (minor), 38.225 min (major).

**(3R,12'S,Z)-1,12'-dibenzyl-6',9',11',12'-tetrahydrospiro[indoline-3,13'-[1,3]dioxolo[4',5':4,5]benzo[1,2-g][1,6]dioxacycloundecin]-2-one (5d)**

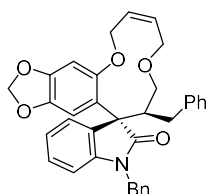

Yellow oil, 24.0 mg, 44% yield, >20:1 dr, 95% ee,  $[\alpha]_D^{19}$   $-16$  ( $c = 1.00$ ,  $\text{CH}_2\text{Cl}_2$ ), purified by column chromatography on silica gel (petroleum ether/EtOAc = 10:1).  $^1\text{H NMR}$  (400 MHz,  $\text{CDCl}_3$ )  $\delta$  7.80 (d,  $J = 7.4\text{ Hz}$ , 1H), 7.41 (d,  $J = 7.3\text{ Hz}$ , 2H), 7.33 (t,  $J = 7.4\text{ Hz}$ , 2H), 7.25 (s, 1H), 7.14 – 7.03 (m, 4H), 6.97 – 6.90 (m, 3H), 6.71 (dd,  $J = 7.7\text{ Hz}$ , 3H), 6.54 (s, 2H), 6.17 – 6.11 (m, 1H), 5.86 (s, 1H), 5.81 (s, 1H), 5.74 – 5.67

(m, 1H), 5.09 (d,  $J = 15.5$  Hz, 1H), 4.99 (d,  $J = 15.5$  Hz, 1H), 4.90 (dd,  $J = 12.4, 6.4$  Hz, 1H), 4.67 (dd,  $J = 12.4, 6.9$  Hz, 1H), 4.24 – 4.20 (m, 1H), 4.09 (dd,  $J = 12.8, 3.2$  Hz, 1H), 4.00 – 3.94 (m, 1H), 3.84 (dd,  $J = 12.7, 7.8$  Hz, 1H), 3.54 (dd,  $J = 12.4, 5.4$  Hz, 1H), 2.45 (dd,  $J = 13.3, 9.1$  Hz, 1H), 2.20 (dd,  $J = 13.3, 2.9$  Hz, 1H).  $^{13}\text{C}$  NMR (100 MHz,  $\text{CDCl}_3$ )  $\delta$  178.0, 151.8, 147.1, 141.9, 141.6, 141.6, 135.9, 135.5, 134.7, 129.0, 128.8, 127.8, 127.8, 127.8, 127.6, 125.5, 124.2, 123.3, 120.7, 109.0, 108.8, 101.4, 96.9, 69.6, 62.0, 61.6, 60.1, 43.9, 41.1, 36.5. HRMS (ESI):  $[\text{M}+\text{Na}]^+$  Calcd. for  $\text{C}_{35}\text{H}_{31}\text{NO}_5\text{Na}$ : 568.2091; Found: 568.2091. HPLC (Chiralpak IC column, *n*-hexane/*i*-PrOH = 60/40, flow rate = 1.0 mL/min,  $\lambda = 254$  nm):  $t_{\text{R}} = 12.912$  min (minor), 28.246 min (major).

## 6. Control experiments

### 6.1 Isolation and preparation of the *ortho*-quinone methides (*o*-QMs) **5e**

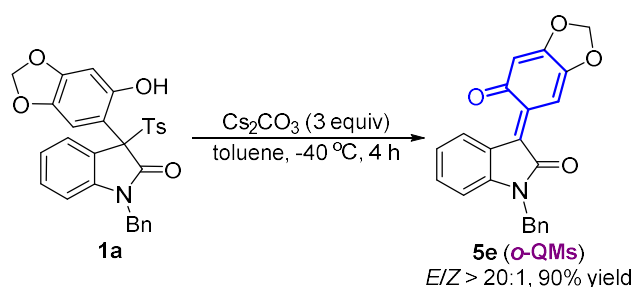

Under an argon atmosphere, a flame-dried 25 mL Schlenk tube was charged with **1a** (154.1 mg, 0.3 mmol) and  $\text{Cs}_2\text{CO}_3$  (879.3 mg, 0.9 mmol, 3.0 equiv.). The tube was evacuated and backfilled with argon for 3 times. Then, dry toluene (5 mL) was added at  $-40$  °C. The resulting solution was stirred at  $-40$  °C for 4 h (monitored by TLC). The reaction mixture was filtrated through flash silica gels to remove inorganic salt and the solvent was removed *in vacuo*. The crude residue was purified by column chromatography on silica gel (petroleum ether/ethyl acetate = 6:1) to furnish the product **5e** (321.6 mg, 90% yield,) as a purple solid.

**(E)-1-benzyl-3-(6-oxobenzo[*d*][1,3]dioxol-5(6*H*)-ylidene)indolin-2-one (5e).** Purple solid, 321.6 mg,  $E/Z > 20:1$ , 90% yield, m.p. 152.7 – 153.9 °C, purified by column chromatography on silica gel (petroleum ether/EtOAc = 6:1).  $^1\text{H}$  NMR (400 MHz,  $\text{CDCl}_3$ )  $\delta$  8.76 (d,  $J = 8.0$  Hz, 1H), 8.59 (s, 1H), 7.29 – 7.18 (m, 6H), 6.91 (t,  $J = 7.8$  Hz, 1H), 6.64 (d,  $J = 7.8$  Hz, 1H), 5.93 (s, 2H), 5.92 (s, 1H), 4.92 (s, 2H).  $^{13}\text{C}$  NMR (100 MHz,  $\text{CDCl}_3$ )  $\delta$  187.8, 169.2, 159.5, 150.3, 144.2, 136.5, 135.8, 132.7, 130.6, 128.8, 127.8, 127.6, 127.4, 127.2, 122.4, 122.0, 108.7, 102.8, 101.5, 101.1, 43.5. HRMS (ESI):  $[\text{M}+\text{Na}]^+$  Calcd. for  $\text{C}_{22}\text{H}_{15}\text{NO}_4\text{Na}$ : 380.0892; Found: 380.0893.



## 6.2 Control experiment with isolated *o*-QMs **5e**

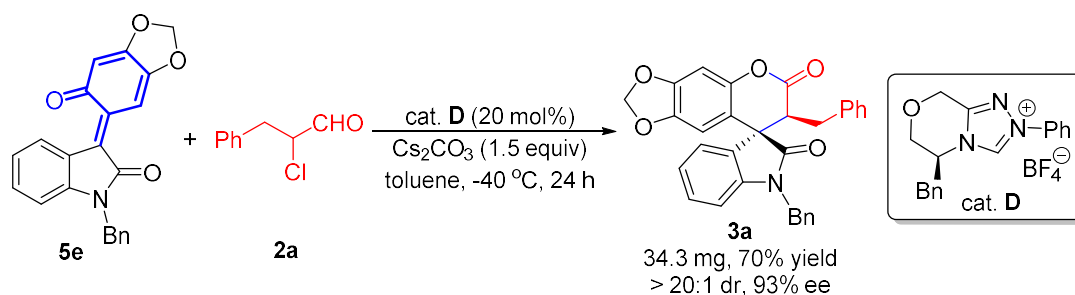

Under an argon atmosphere, a flame-dried 25 mL Schlenk tube was charged with **5e** (35.7 mg, 0.1 mmol), **2** (42.2 mg, 0.25 mmol, 2.5 equiv.), Cs<sub>2</sub>CO<sub>3</sub> (48.9 mg, 0.15 mmol, 1.5 equiv.) and **Cat. D** (7.6 mg, 0.02 mmol, 20 mol %). The tube was evacuated and backfilled with argon for 3 times. Then, dry toluene (1.5 mL) was added quickly at -40 °C. The resulting solution was stirred at -40 °C for 24 h (monitored by TLC). The reaction mixture was filtrated through flash silica gels to remove inorganic salt and the solvent was removed *in vacuo*. The crude residue was purified by column chromatography on silica gel (petroleum ether/ethyl acetate = 5:1) to yield the product **3a** (34.3 mg, 70% yield, >20:1 dr, 93% ee).

## 7. Preparation for the Single Crystal of Compound **3b**

In a 5 mL glass vial, the compound **3b** (20 mg) was dissolved in CHCl<sub>3</sub> (1 mL) and then *n*-hexane (4 mL) was added slowly. The solution was kept aside for overnight, and the crystal was formed. The crystal was subjected for single-crystal XRD to determine the absolute configuration.

## 8. Single Crystal XRD Data of Compound **3b**

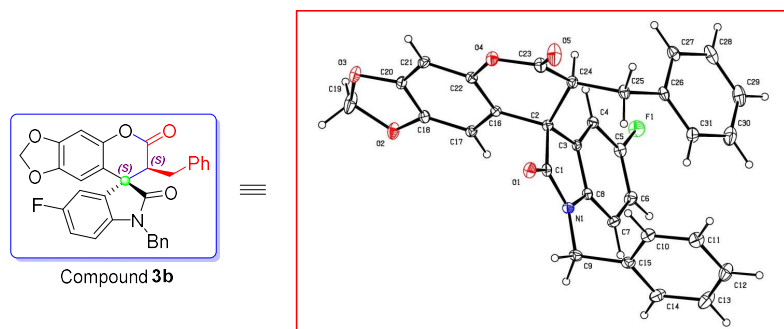

**Figure S1.** ORTEP representation (20% thermal probability ellipsoids) of the crystal structure of compound **3b** (CCDC 2324543).

**Table S1.** Crystallographic data and refinement details for compound **3b**

| Identification code                                          | Compound <b>3b</b>                                                           |
|--------------------------------------------------------------|------------------------------------------------------------------------------|
| Empirical formula                                            | C <sub>31</sub> H <sub>22</sub> FNO <sub>5</sub>                             |
| Formula weight                                               | 507.49                                                                       |
| Temperature/ <i>K</i>                                        | 150.00(10)                                                                   |
| Crystal system                                               | <i>orthorhombic</i>                                                          |
| Space group                                                  | P2 <sub>1</sub> 2 <sub>1</sub> 2 <sub>1</sub>                                |
| <i>a</i> /Å                                                  | 9.67378(10)                                                                  |
| <i>b</i> /Å                                                  | 9.99752(9)                                                                   |
| <i>c</i> /Å                                                  | 25.0687(2)                                                                   |
| <i>α</i> /°                                                  | 90                                                                           |
| <i>β</i> /°                                                  | 90                                                                           |
| <i>γ</i> /°                                                  | 90                                                                           |
| Volume/Å <sup>3</sup>                                        | 2424.49(4)                                                                   |
| <i>Z</i>                                                     | 4                                                                            |
| $\rho_{\text{calc}}$ g/cm <sup>3</sup>                       | 1.390                                                                        |
| $\mu$ /mm <sup>-1</sup>                                      | 0.824                                                                        |
| <i>F</i> (000)                                               | 1056.0                                                                       |
| Crystal size/mm <sup>3</sup>                                 | 0.18 × 0.14 × 0.12                                                           |
| Radiation                                                    | Cu <i>Kα</i> ( $\lambda$ = 1.54184)                                          |
| 2 $\theta$ range for data collection/°                       | 7.052 to 152.62                                                              |
| Index ranges                                                 | -11 ≤ <i>h</i> ≤ 11, -12 ≤ <i>k</i> ≤ 11, -31 ≤ <i>l</i> ≤ 22                |
| Reflections collected                                        | 13770                                                                        |
| Independent reflections                                      | 4746 [ <i>R</i> <sub>int</sub> = 0.0257, <i>R</i> <sub>sigma</sub> = 0.0262] |
| Data/restraints/parameters                                   | 4746/0/344                                                                   |
| Goodness-of-fit on <i>F</i> <sup>2</sup>                     | 1.072                                                                        |
| Final <i>R</i> indexes [ <i>I</i> ≥ 2 $\sigma$ ( <i>I</i> )] | <i>R</i> <sub>1</sub> = 0.0291, <i>wR</i> <sub>2</sub> = 0.0741              |
| Final <i>R</i> indexes [all data]                            | <i>R</i> <sub>1</sub> = 0.0317, <i>wR</i> <sub>2</sub> = 0.0752              |
| Largest diff. peak/hole / <i>e</i> Å <sup>-3</sup>           | 0.19/-0.13                                                                   |
| Flack parameter                                              | 0.03(6)                                                                      |

## 9. References

- [1] a) M. S. Kerr, J. Read de Alaniz and T. Rovis, *J. Org. Chem.* 2005, **70**, 5725; b) P. C. Chiang, M. Rommel and J. W. Bode, *J. Am. Chem. Soc.* 2009, **131**, 8714; c) S. Kobayashi, T. Kinoshita, H. Uehara, T. Sudo and I. Ryu, *Org. Lett.* 2009, **11**, 3934; d) C. D. Campbell, C. J. Collett, J. E. Thomson, A. M. Slawin and A. D. Smith, *Org. Biomol. Chem.* 2011, **9**, 4205; e) I. Piel, M. Steinmetz, K. Hirano, R. Frohlich, S. Grimme and F. Glorius, *Angew. Chem. Int. Ed.* 2011, **50**, 4983; f) C. Zhao, F. Li and J. Wang, *Angew. Chem. Int. Ed.* 2016, **55**, 1820; g) L. Dai, Z. H. Xia, Y. Y. Gao, Z. H. Gao and S. Ye, *Angew. Chem. Int. Ed.* 2019, **58**, 18124; h) Y. Wu, M. Li, J. Sun, G. Zheng and Q. Zhang, *Angew. Chem. Int. Ed.* 2022, **61**, e202117340.
- [2] a) W. Guo, B. Wu, X. Zhou, P. Chen, X. Wang, Y. G. Zhou, Y. Liu and C. Li, *Angew. Chem. Int. Ed.*, 2015, **54**, 4522; b) N. Kumar, J. Kaur, A. Kumar, N. Islam and S. S. Chimni, *Asian J. Org. Chem.*, 2016, **5**, 1334; c) P. Chen, K. Wang, W. Guo, X. Liu, Y. Liu and C. Li, *Angew. Chem. Int. Ed.*, 2017, **56**, 3689; d) L. Wang, Z. Huang, X. Guo, J. Liu, J. Dong and X. Xu, *Chem. Commun.*, 2022, **58**, 6433.
- [3] a) T. Borg, J. Danielsson, M. Mohiti, P. Restorp and P. Somfai, *Adv. Synth. Catal.*, 2011, **353**, 2022; b) Y. Jing, C. G. Daniliuc, A. Studer, *Org. Lett.*, 2014, **16**, 4932; c) S. Wang, J. Izquierdo, C. Rodríguez-Escrich and M. A. Pericàs, *ACS Catal.*, 2017, **7**, 2780.

## 10. NMR Spectra of compounds 3a–3v, 4a–4o, 4q and 5a–5e

### <sup>1</sup>H NMR spectrum of compound 3a (CDCl<sub>3</sub>, 400 MHz)

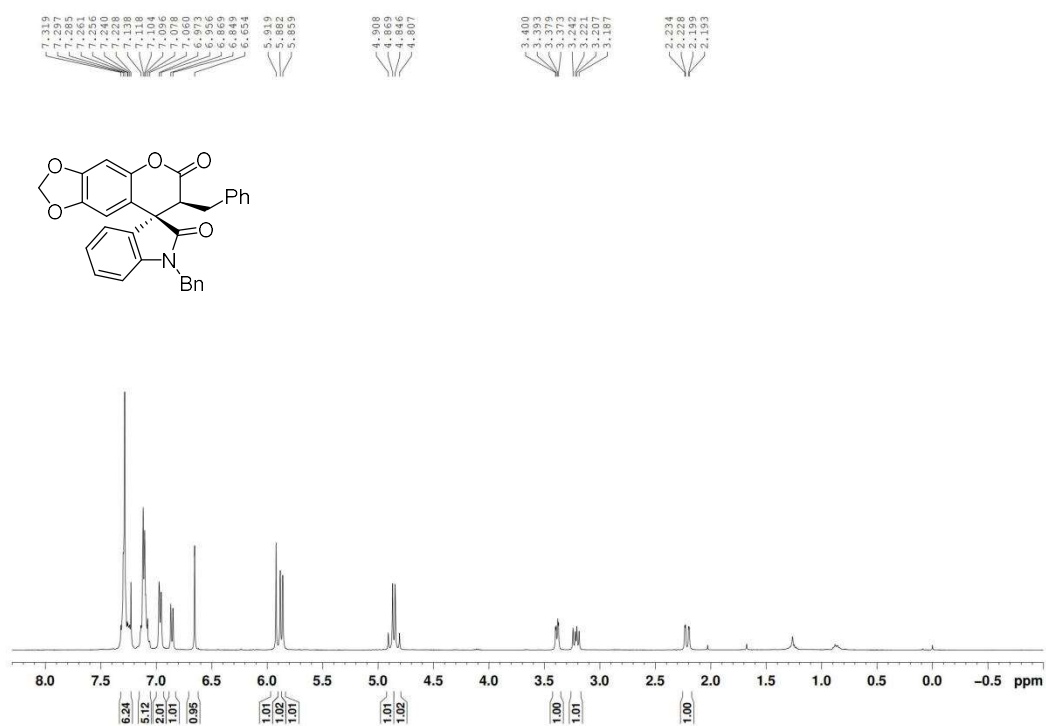

### <sup>13</sup>C NMR spectrum of compound 3a (CDCl<sub>3</sub>, 100 MHz)

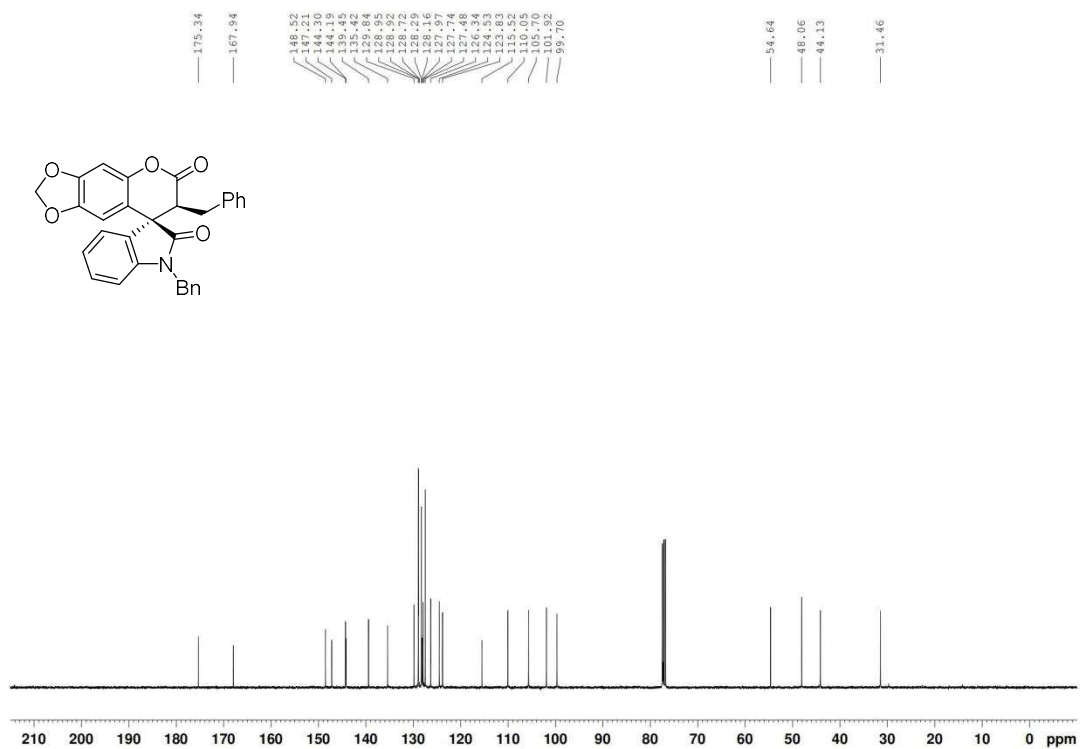



$^{19}\text{F}$  NMR spectrum of compound **3b** ( $\text{CDCl}_3$ , 376 MHz)

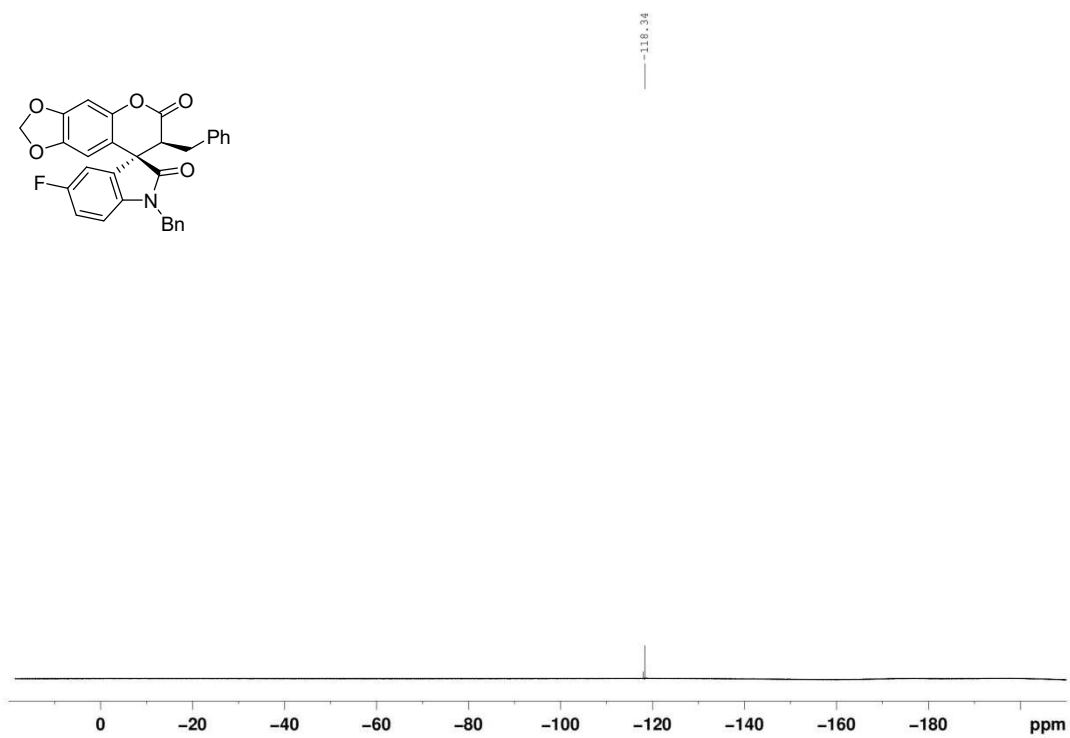

$^1\text{H}$  NMR spectrum of compound **3c** ( $\text{CDCl}_3$ , 400 MHz)

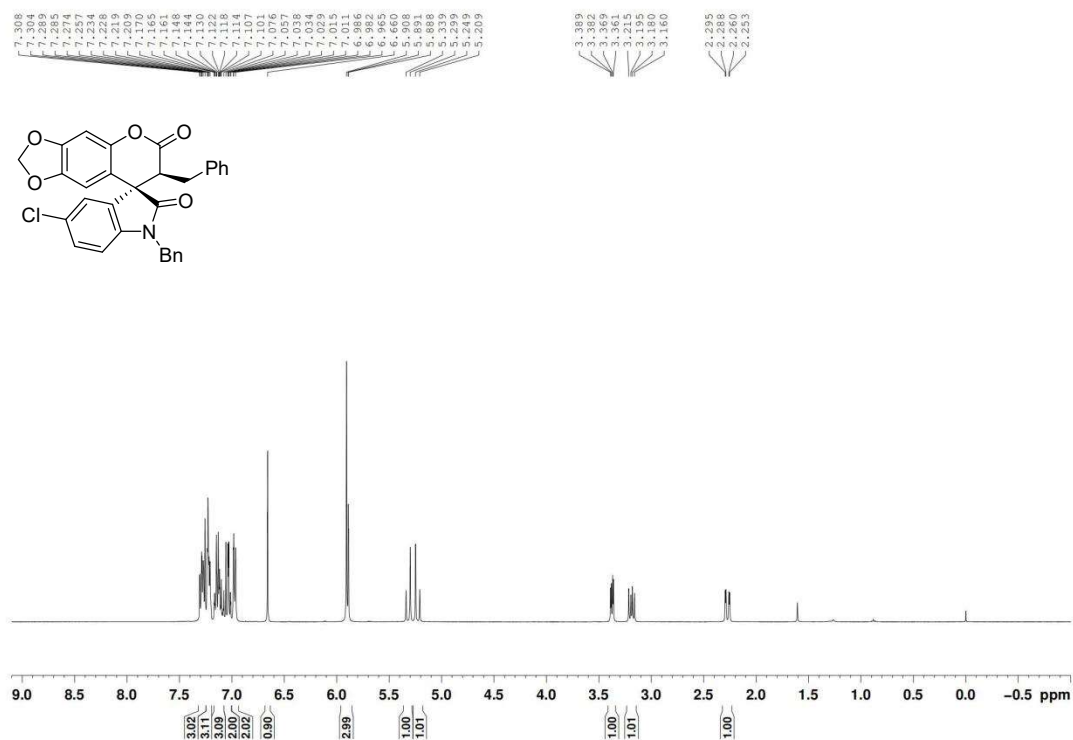

$^{13}\text{C}$  NMR spectrum of compound **3c** ( $\text{CDCl}_3$ , 100 MHz)

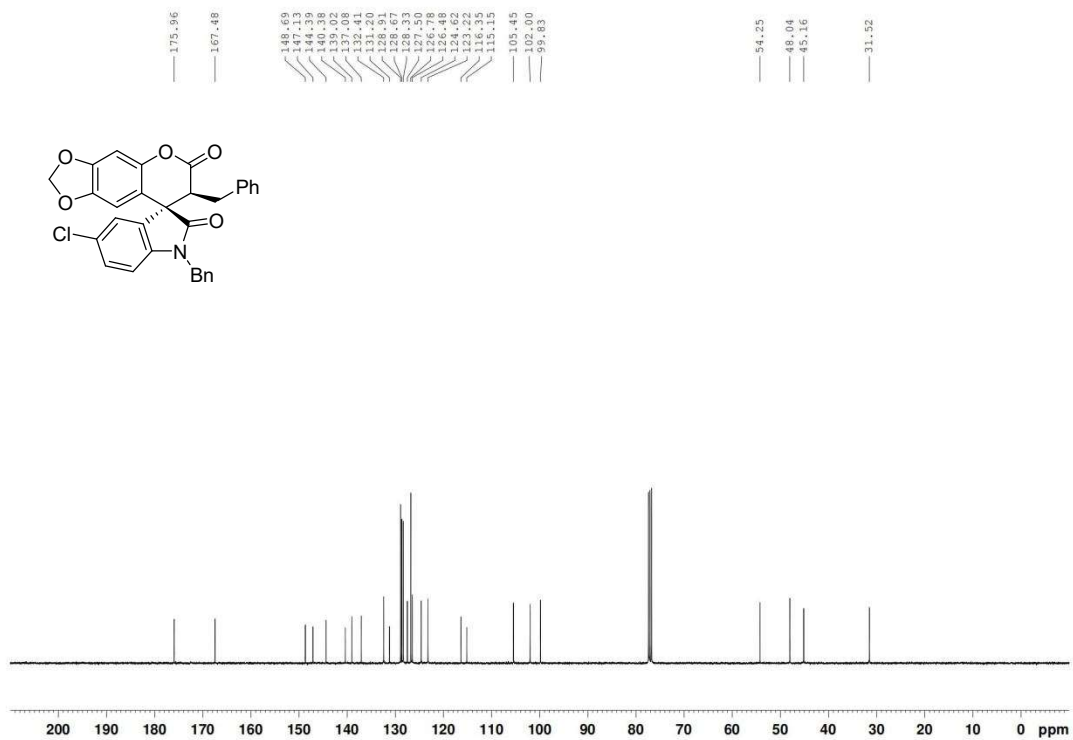

$^1\text{H}$  NMR spectrum of compound **3d** ( $\text{CDCl}_3$ , 400 MHz)

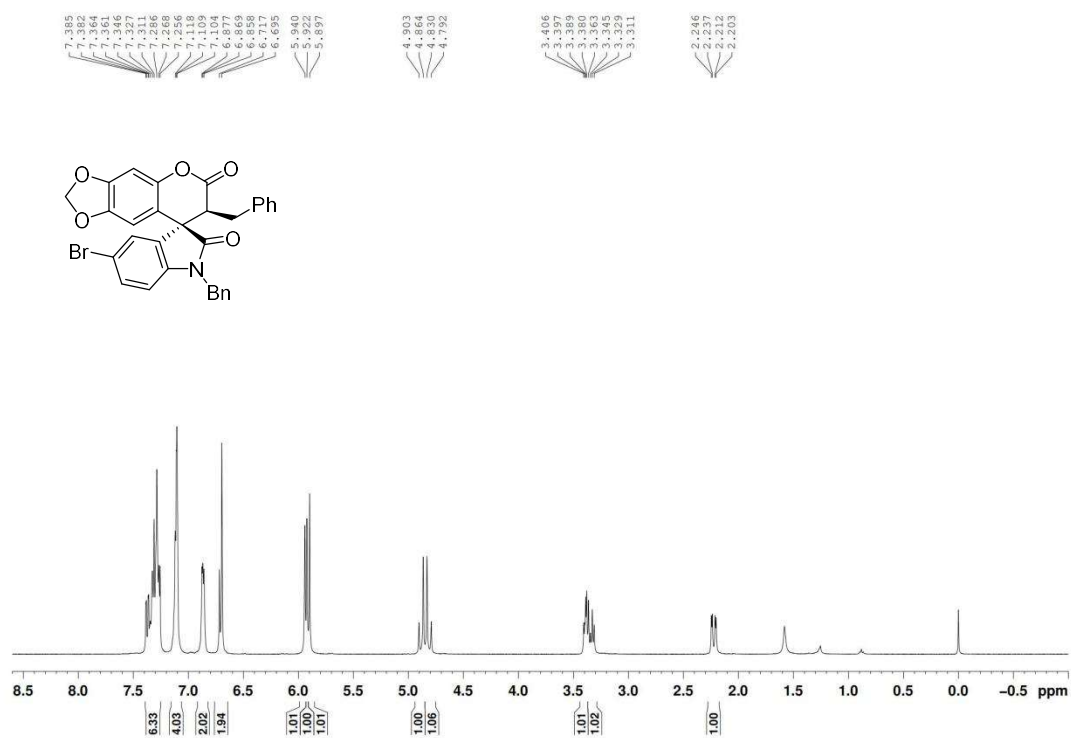

$^{13}\text{C}$  NMR spectrum of compound **3d** ( $\text{CDCl}_3$ , 100 MHz)

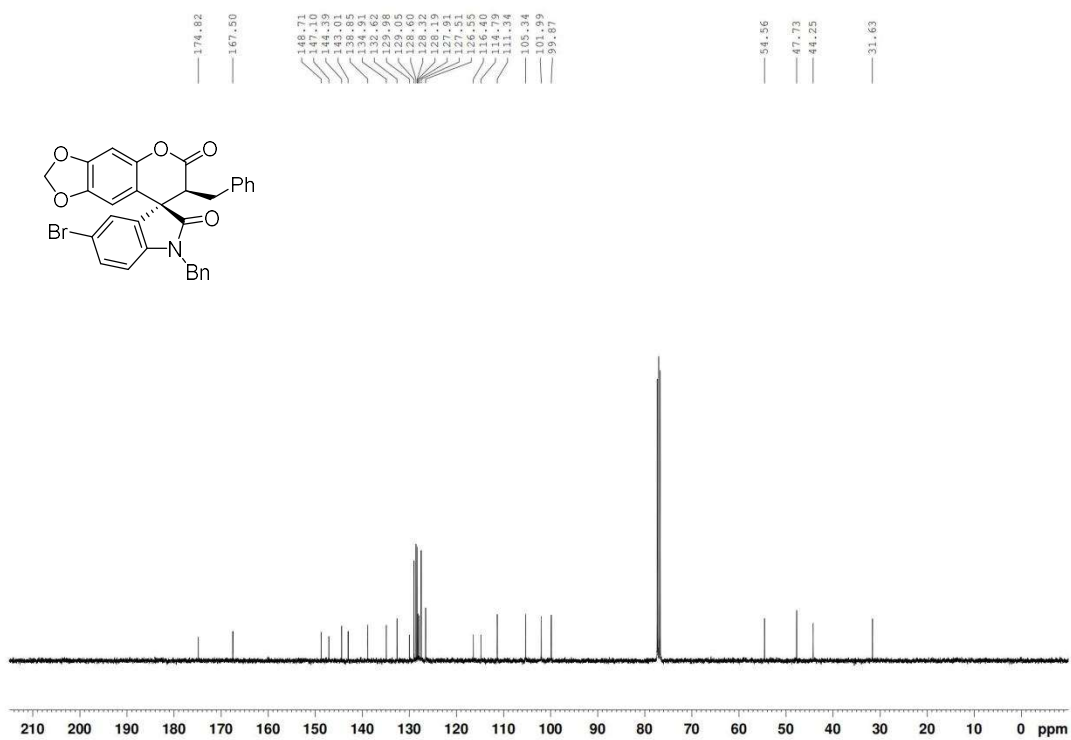



$^1\text{H}$  NMR spectrum of compound **3e** ( $\text{CDCl}_3$ , 400 MHz)

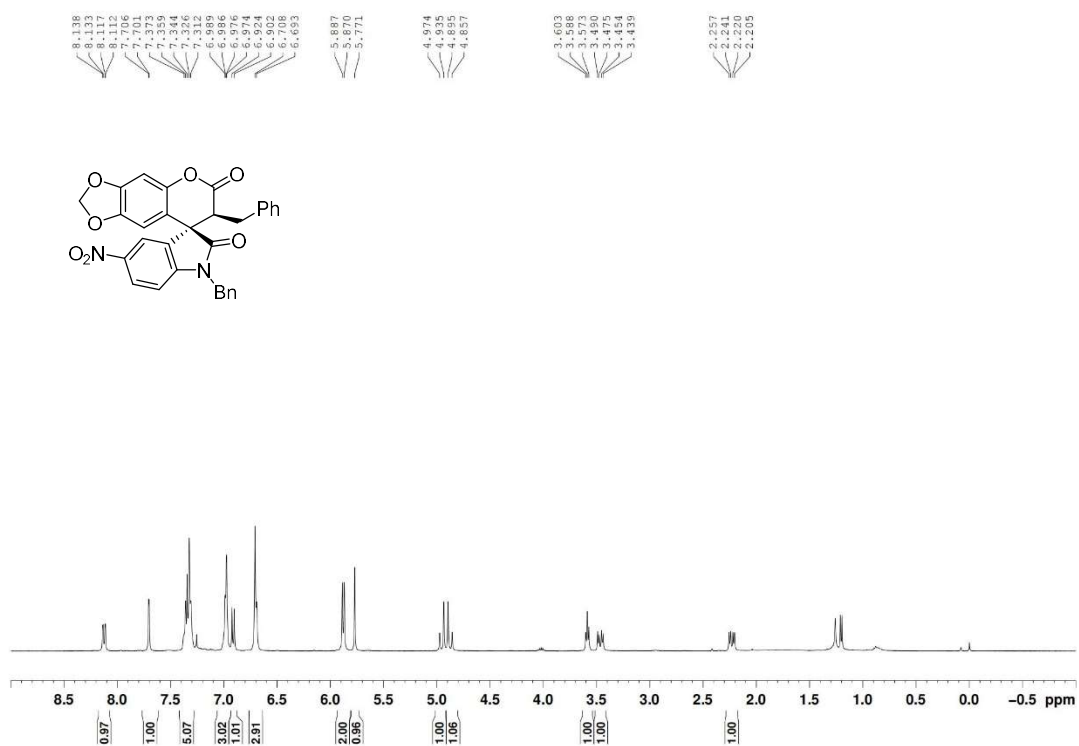

$^{13}\text{C}$  NMR spectrum of compound **3e** ( $\text{CDCl}_3$ , 100 MHz)

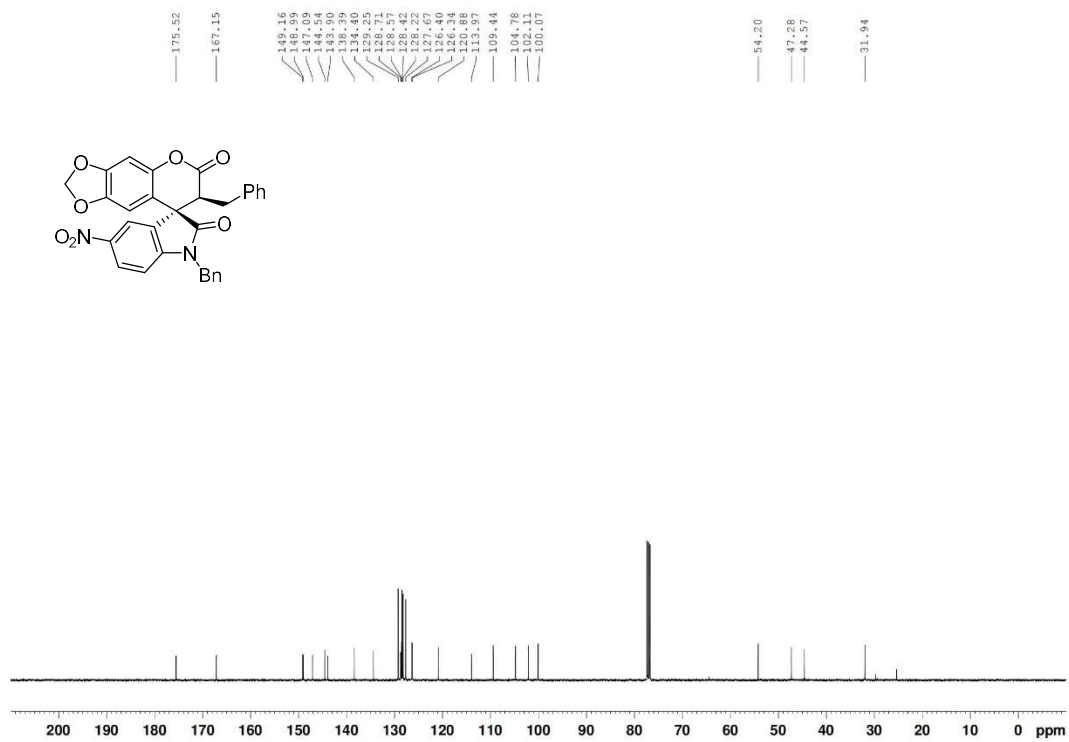

<sup>1</sup>H NMR spectrum of compound **3f** (CDCl<sub>3</sub>, 400 MHz)

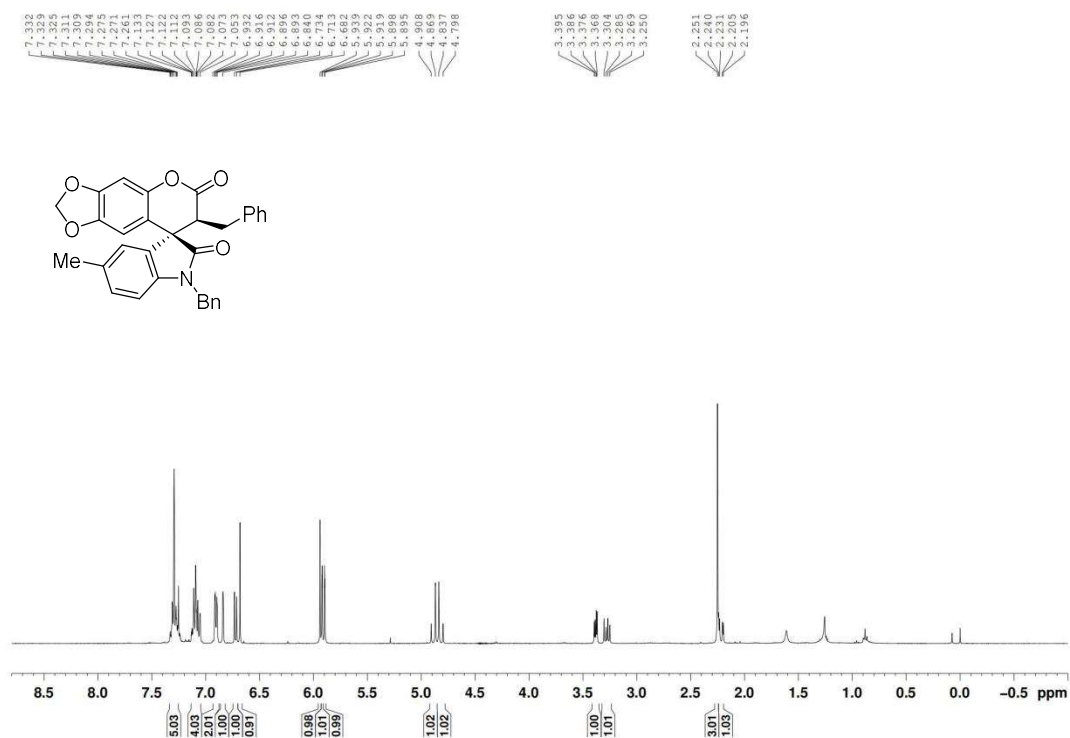

<sup>13</sup>C NMR spectrum of compound **3f** (CDCl<sub>3</sub>, 100 MHz)

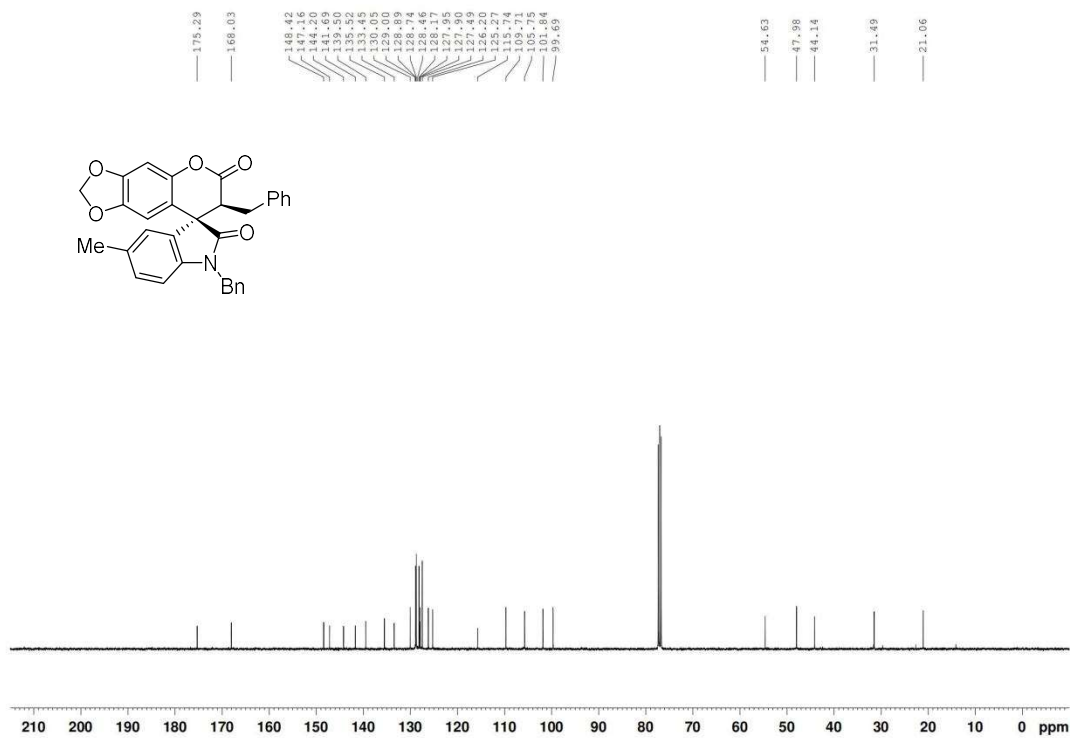

<sup>1</sup>H NMR spectrum of compound **3g** (CDCl<sub>3</sub>, 400 MHz)

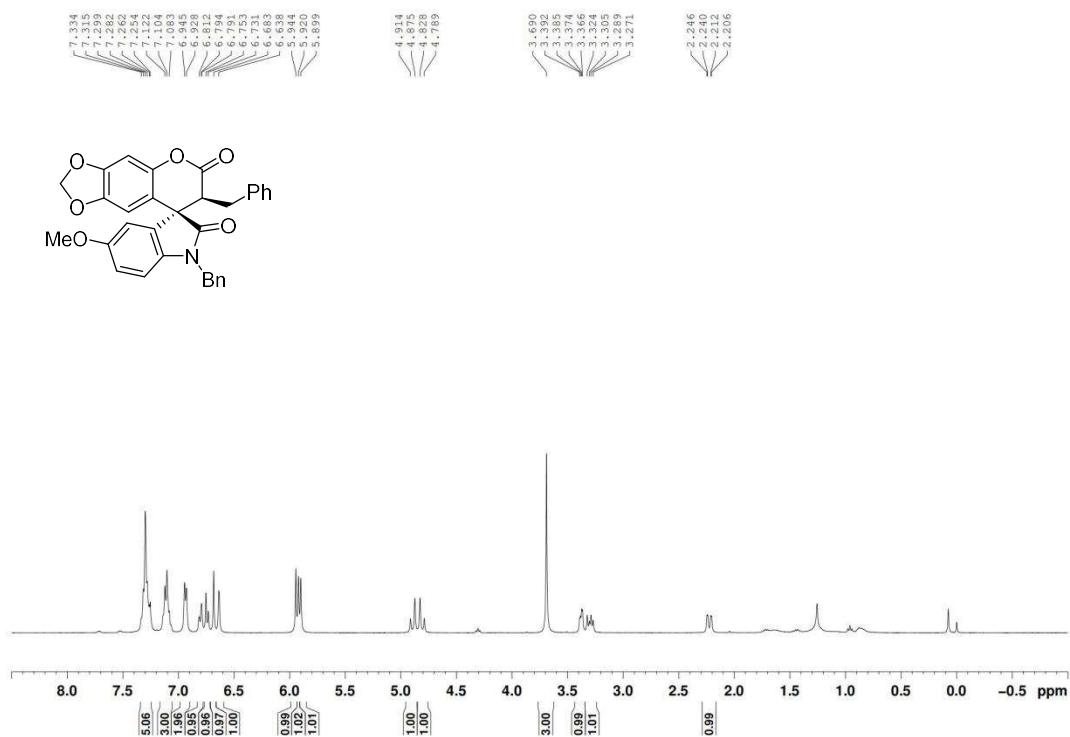

<sup>13</sup>C NMR spectrum of compound **3g** (CDCl<sub>3</sub>, 100 MHz)

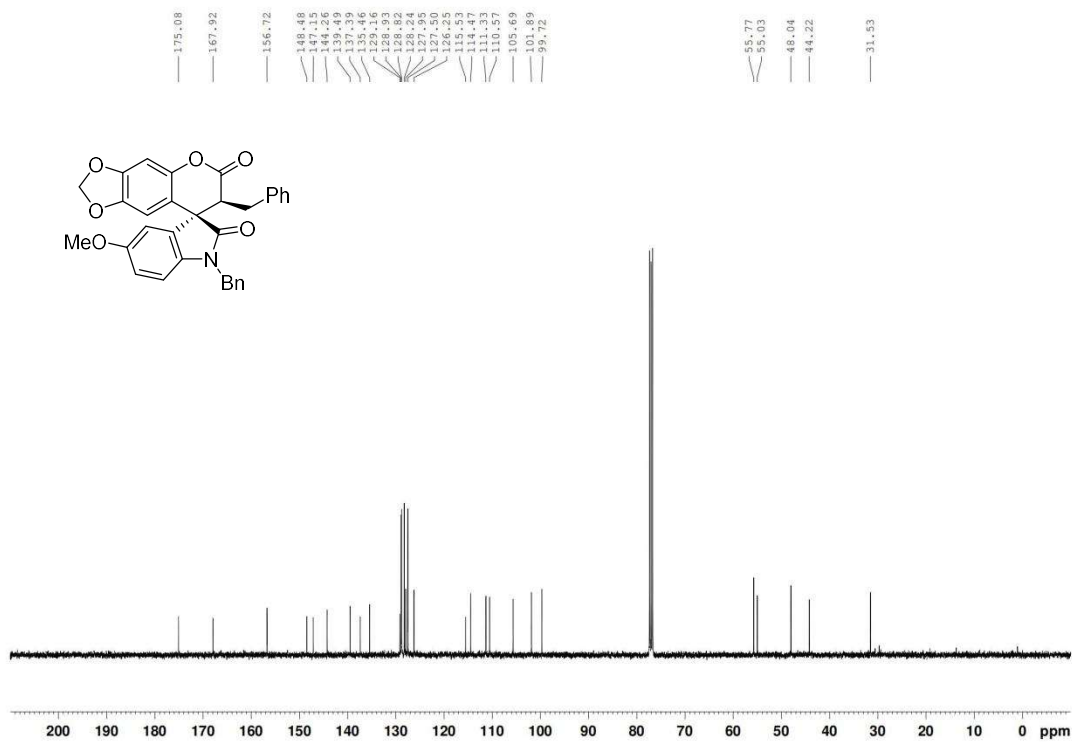

$^1\text{H}$  NMR spectrum of compound **3h** ( $\text{CDCl}_3$ , 600 MHz)

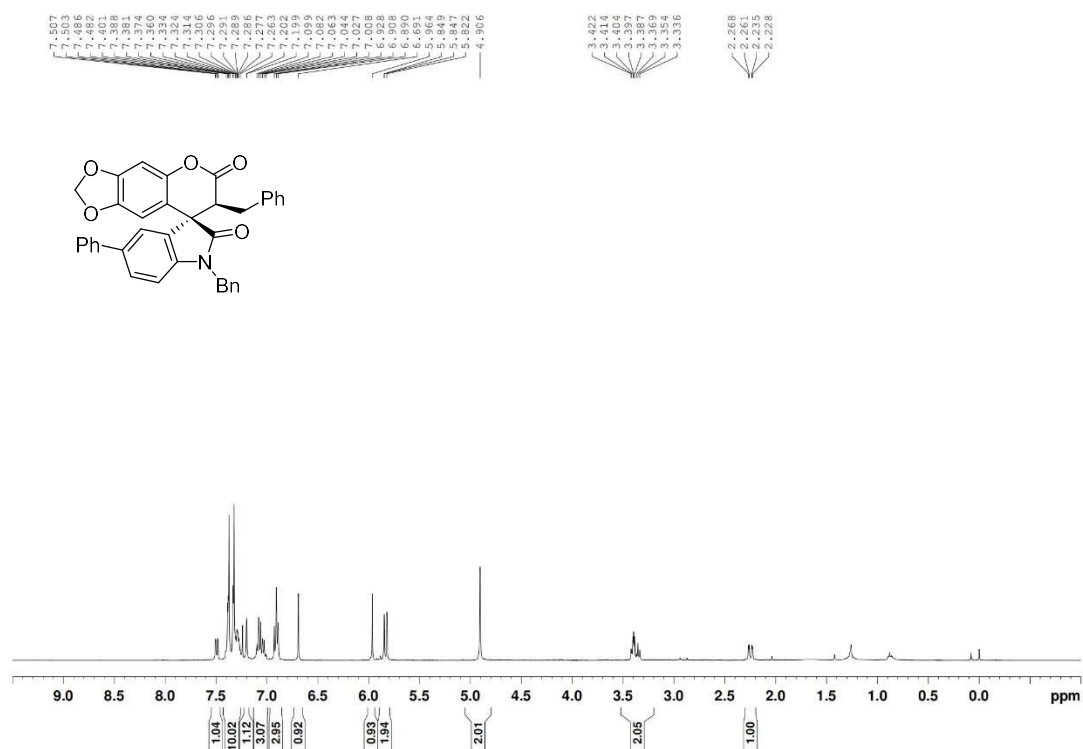

$^{13}\text{C}$  NMR spectrum of compound **3h** ( $\text{CDCl}_3$ , 151 MHz)

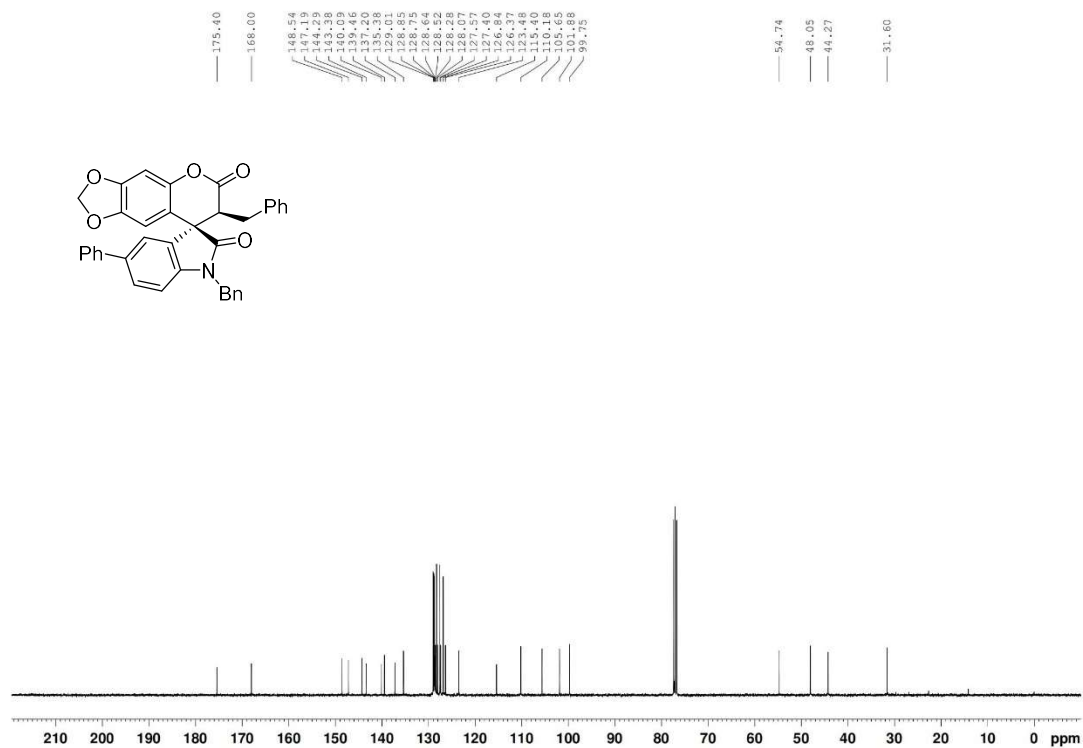

$^1\text{H}$  NMR spectrum of compound **3i** ( $\text{CDCl}_3$ , 600 MHz)

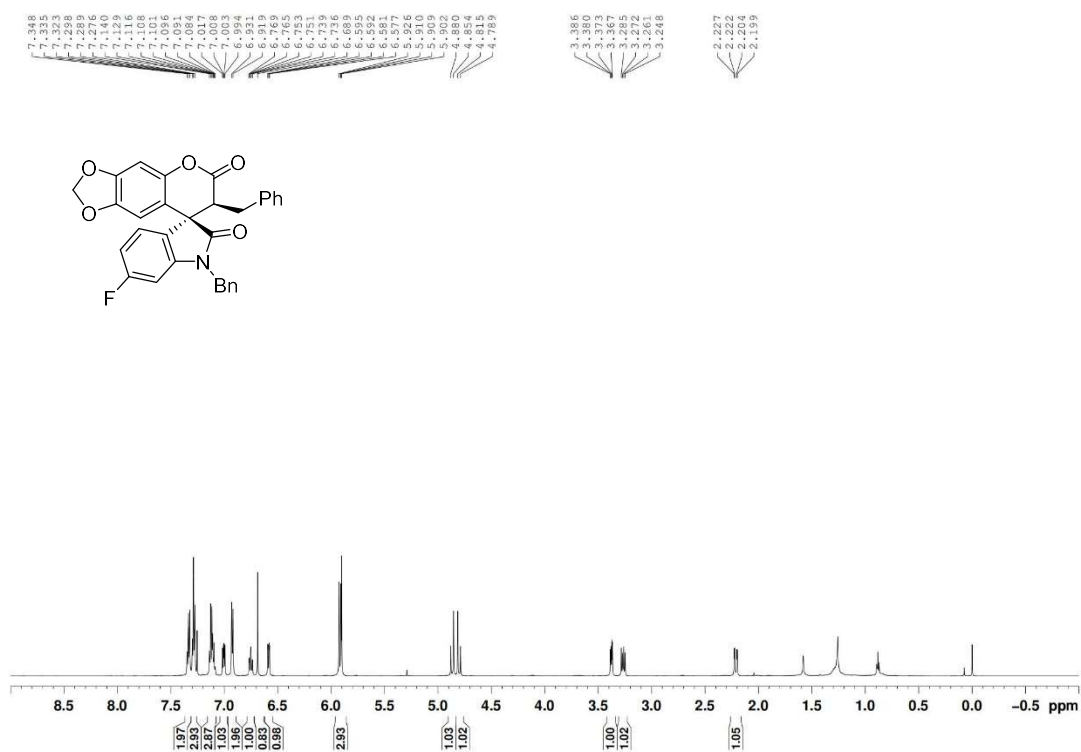

$^{13}\text{C}$  NMR spectrum of compound **3i** ( $\text{CDCl}_3$ , 151 MHz)

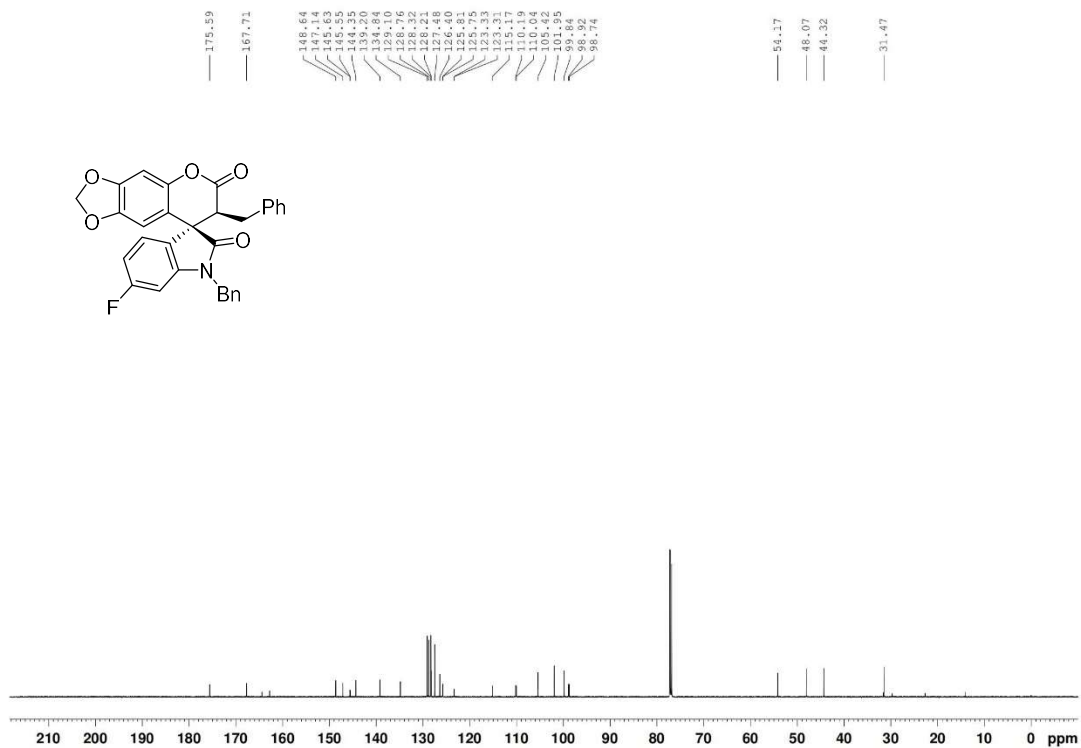

$^{19}\text{F}$  NMR spectrum of compound **3i** ( $\text{CDCl}_3$ , 565 MHz)

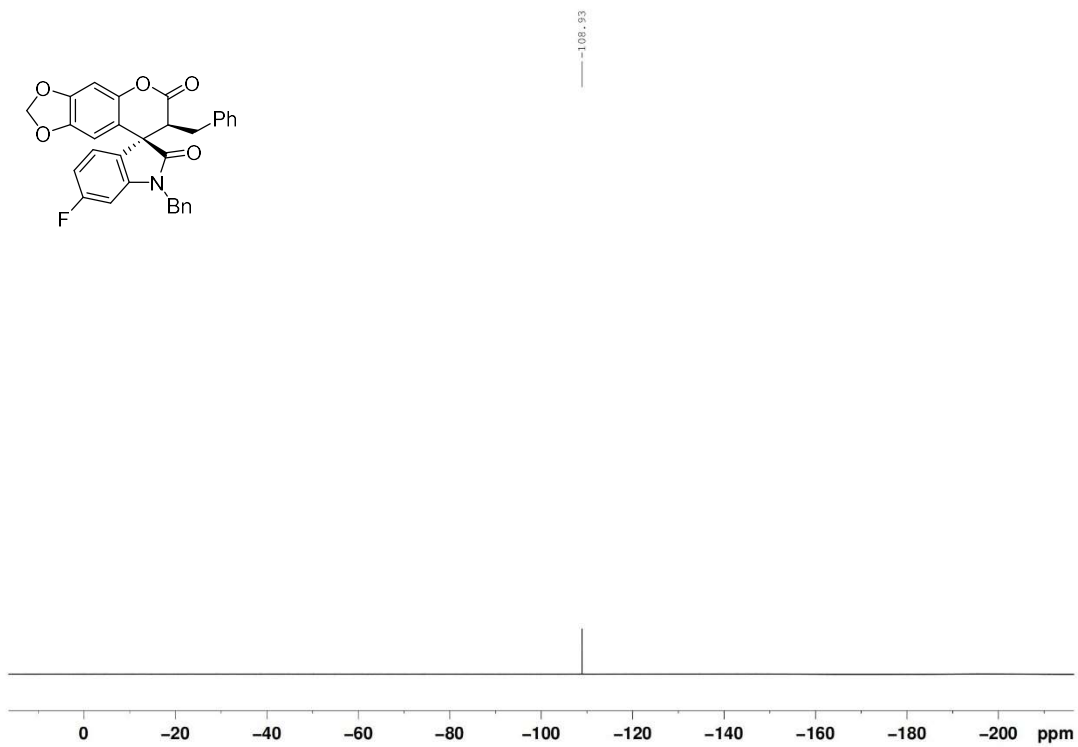

$^1\text{H}$  NMR spectrum of compound **3j** ( $\text{CDCl}_3$ , 400 MHz)

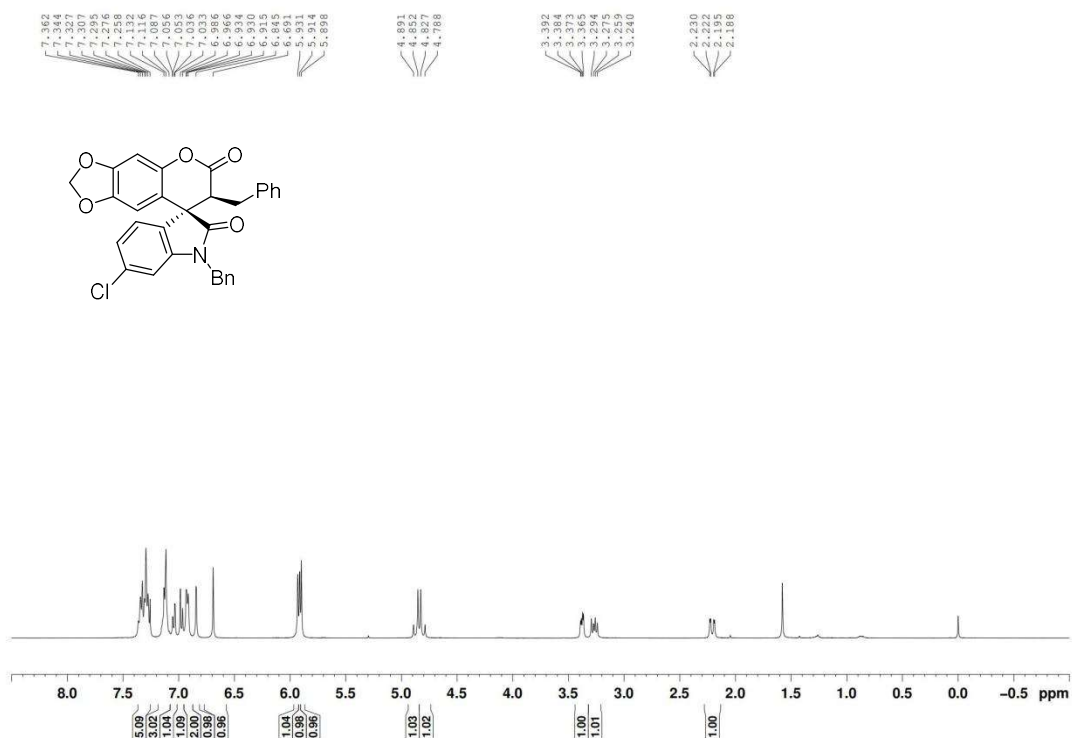

$^{13}\text{C}$  NMR spectrum of compound **3j** ( $\text{CDCl}_3$ , 100 MHz)

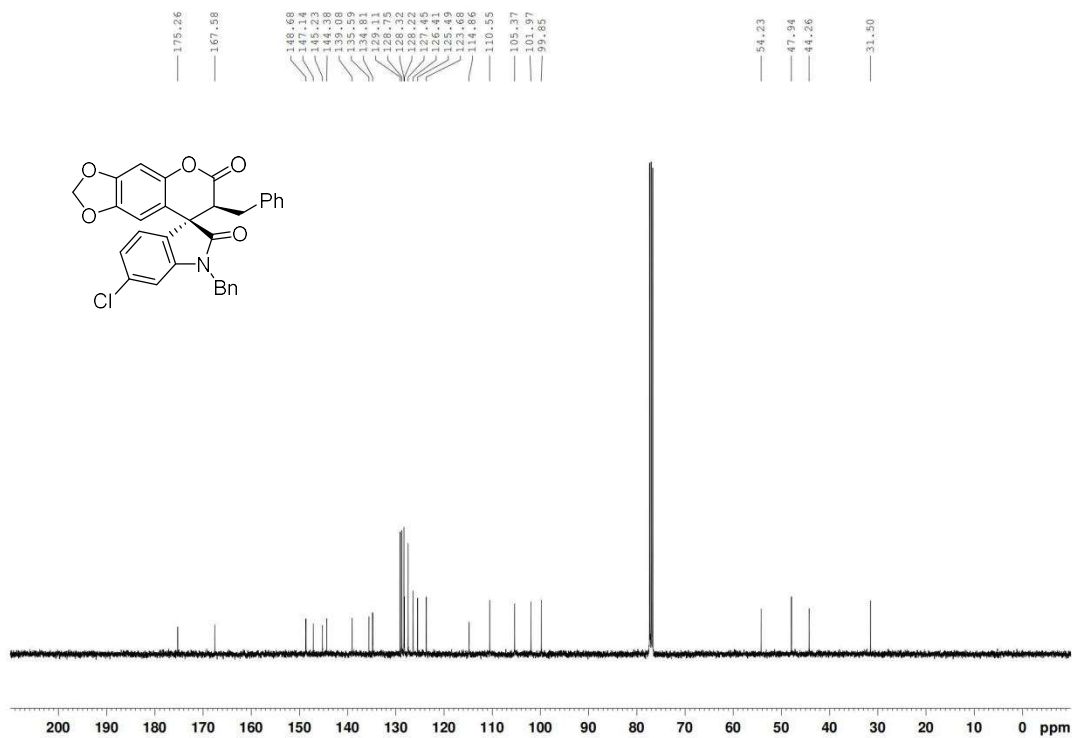





<sup>1</sup>H NMR spectrum of compound **31** (CDCl<sub>3</sub>, 600 MHz)

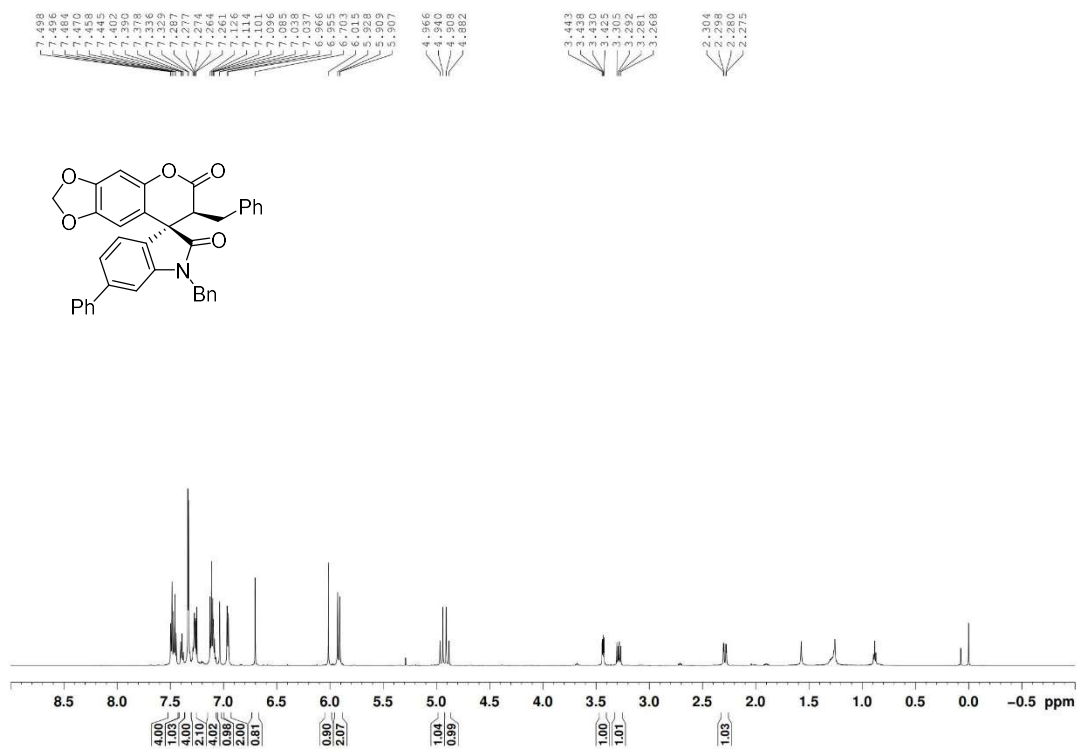

<sup>13</sup>C NMR spectrum of compound **31** (CDCl<sub>3</sub>, 151 MHz)

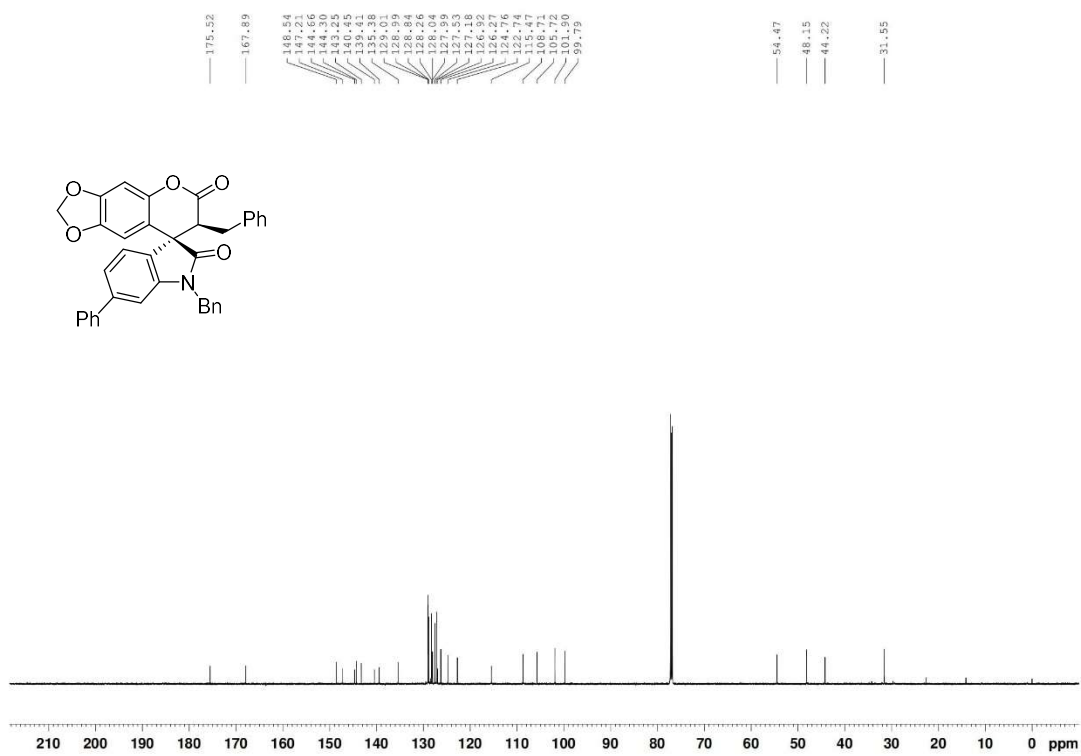

$^1\text{H}$  NMR spectrum of compound **3m** ( $\text{CDCl}_3$ , 400 MHz)

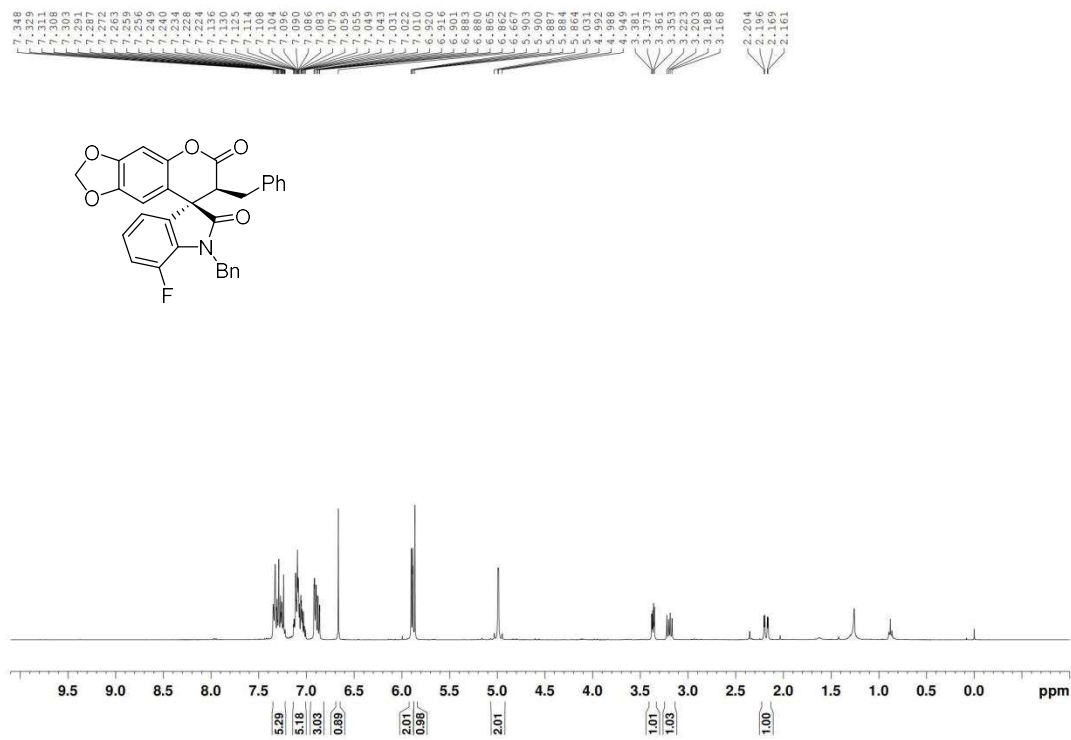

$^{13}\text{C}$  NMR spectrum of compound **3m** ( $\text{CDCl}_3$ , 100 MHz)

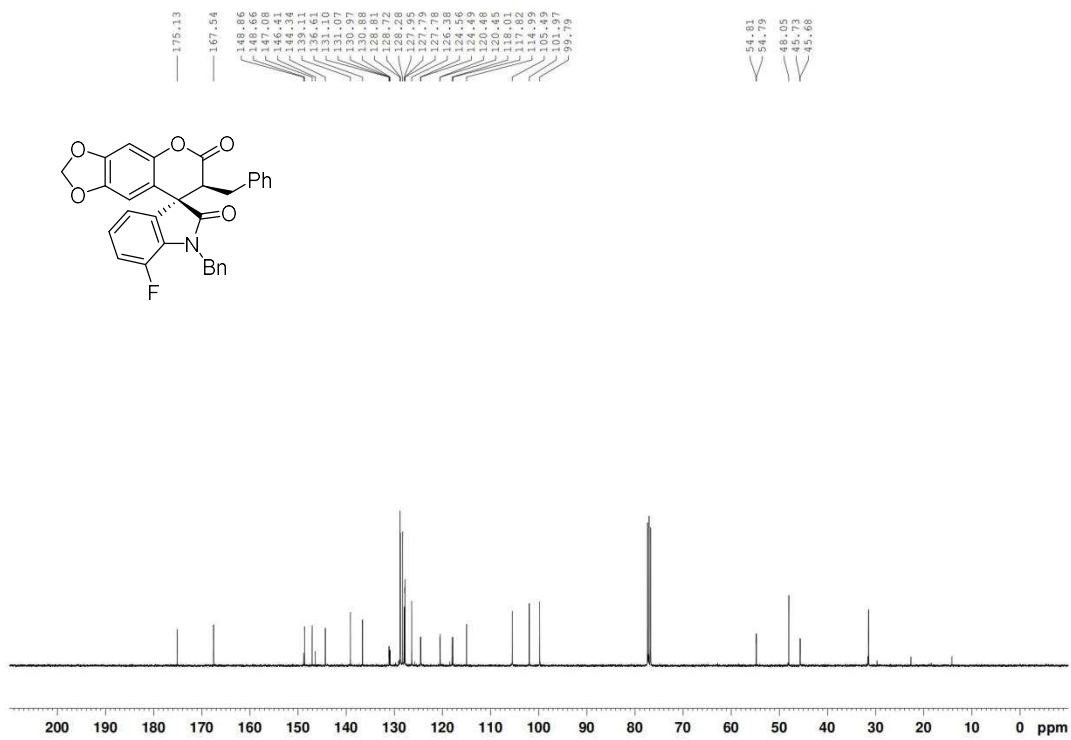

$^{19}\text{F}$  NMR spectrum of compound **3m** ( $\text{CDCl}_3$ , 376 MHz)

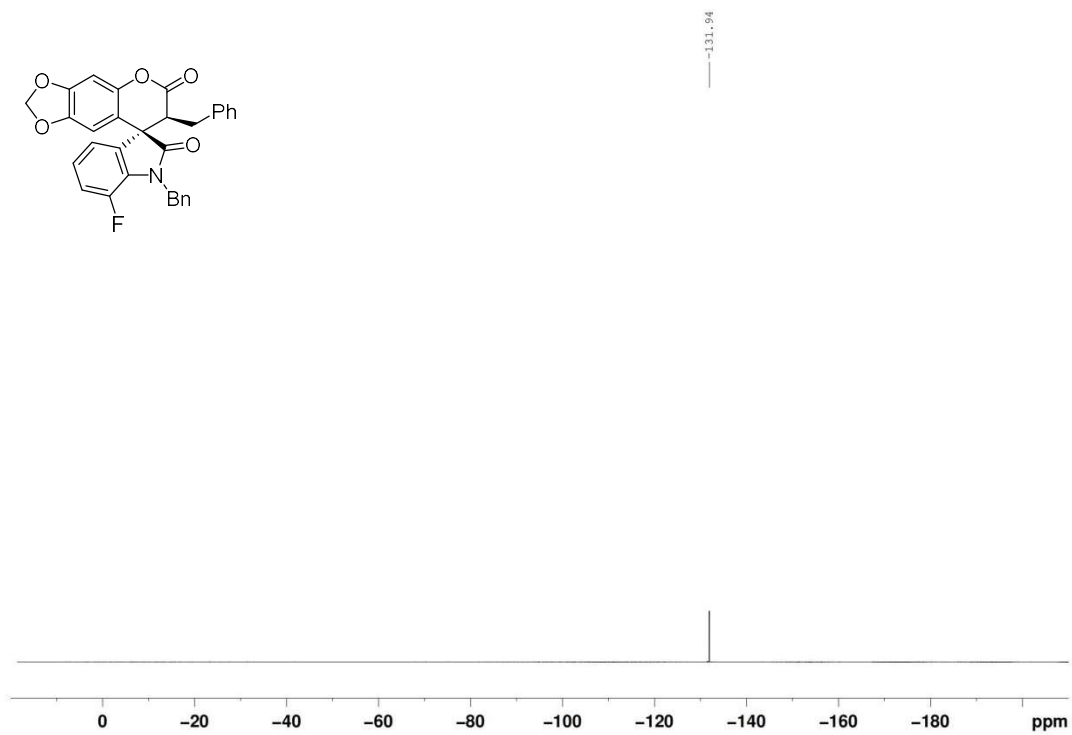

<sup>1</sup>H NMR spectrum of compound **3n** (CDCl<sub>3</sub>, 400 MHz)

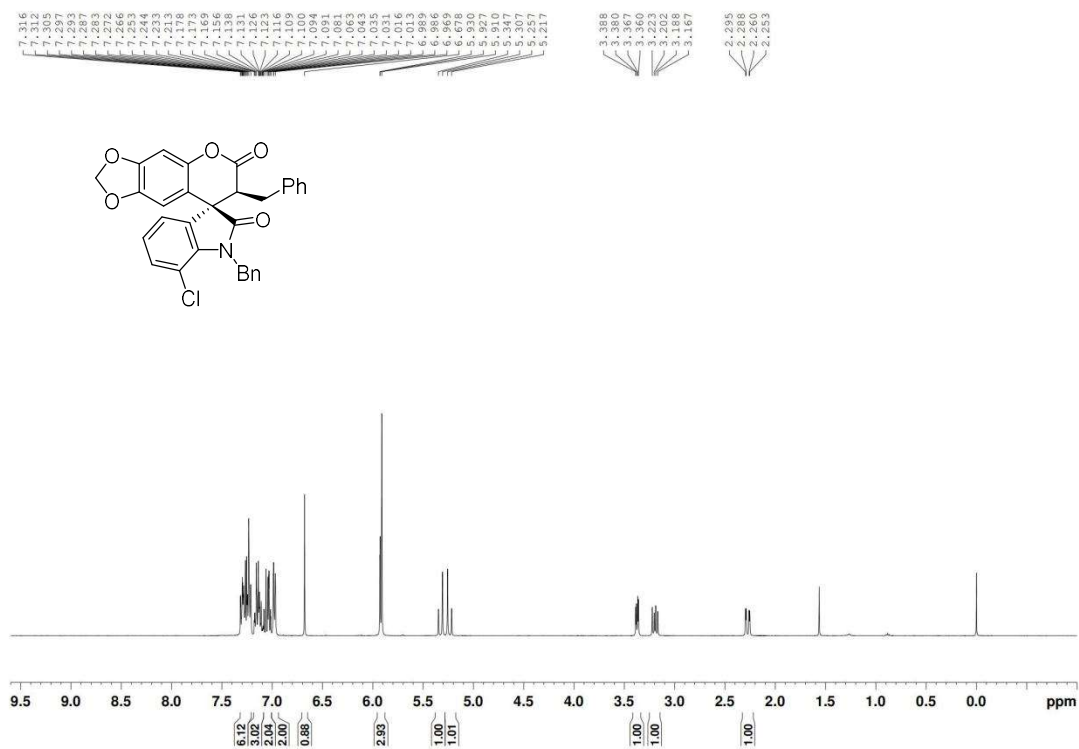

<sup>13</sup>C NMR spectrum of compound **3n** (CDCl<sub>3</sub>, 100 MHz)

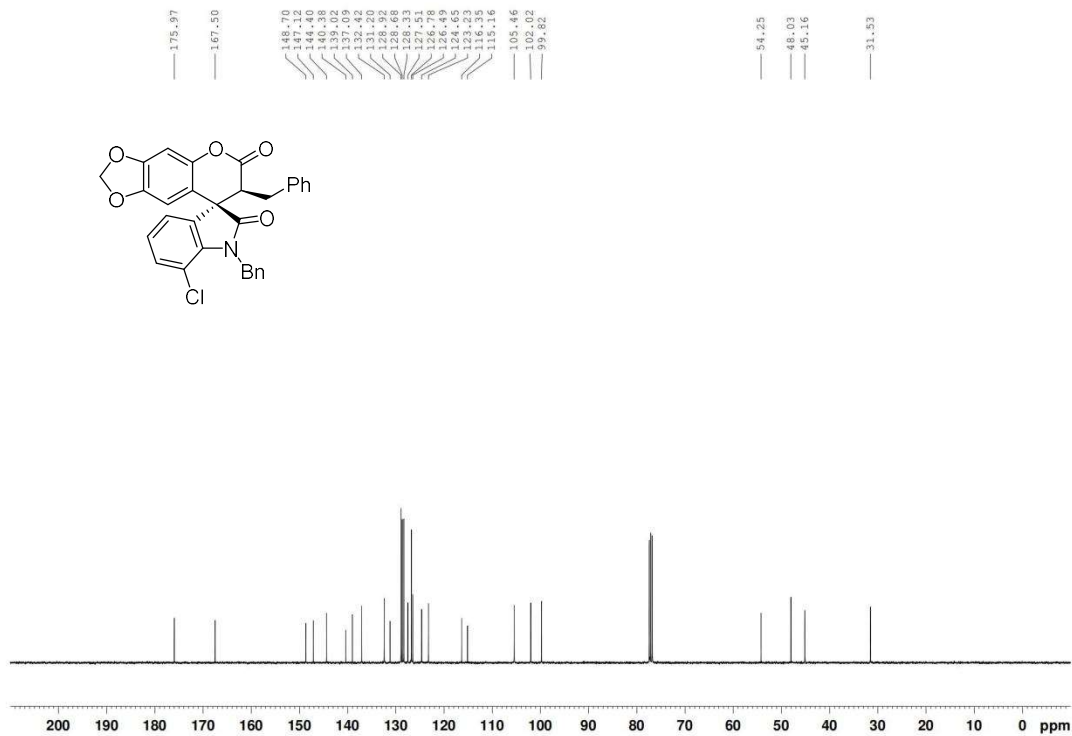

$^1\text{H}$  NMR spectrum of compound **3o** ( $\text{CDCl}_3$ , 400 MHz)

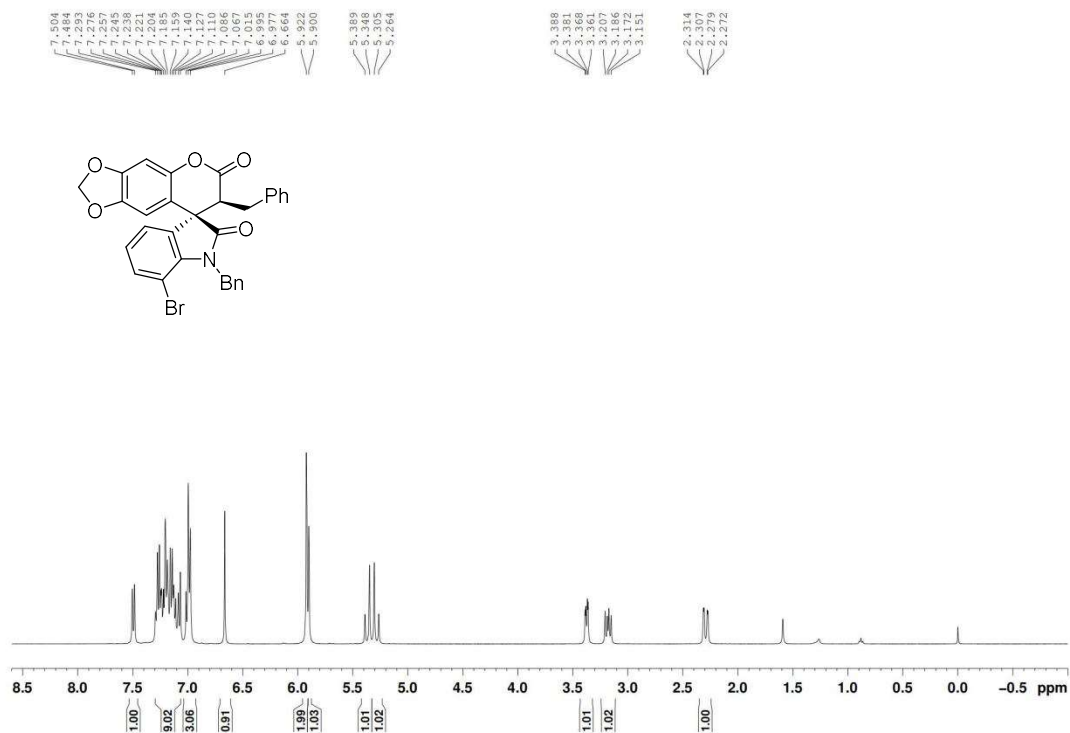

$^{13}\text{C}$  NMR spectrum of compound **3o** ( $\text{CDCl}_3$ , 100 MHz)

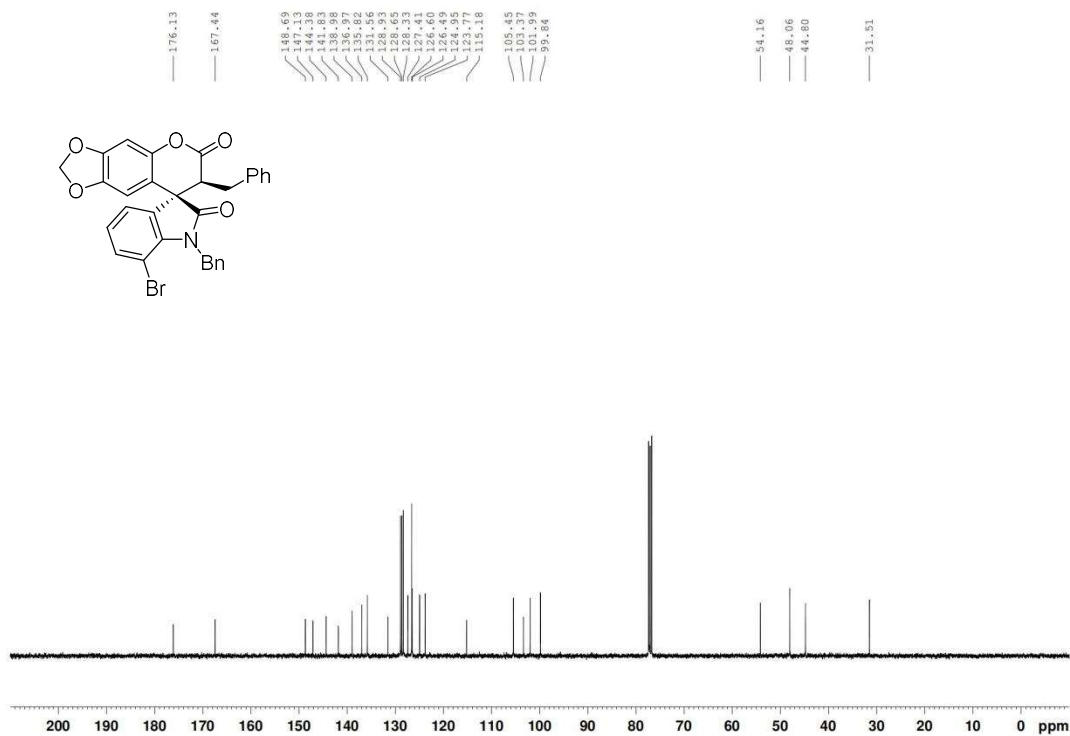

<sup>1</sup>H NMR spectrum of compound **3p** (CDCl<sub>3</sub>, 600 MHz)

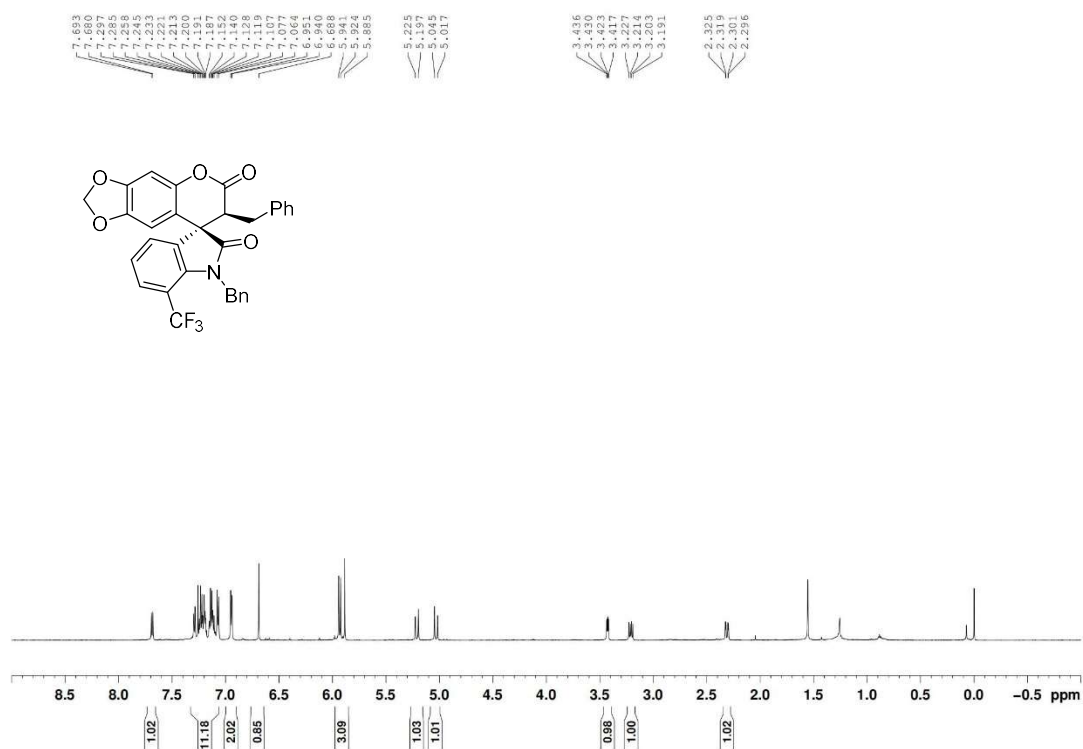

<sup>13</sup>C NMR spectrum of compound **3p** (CDCl<sub>3</sub>, 151 MHz)

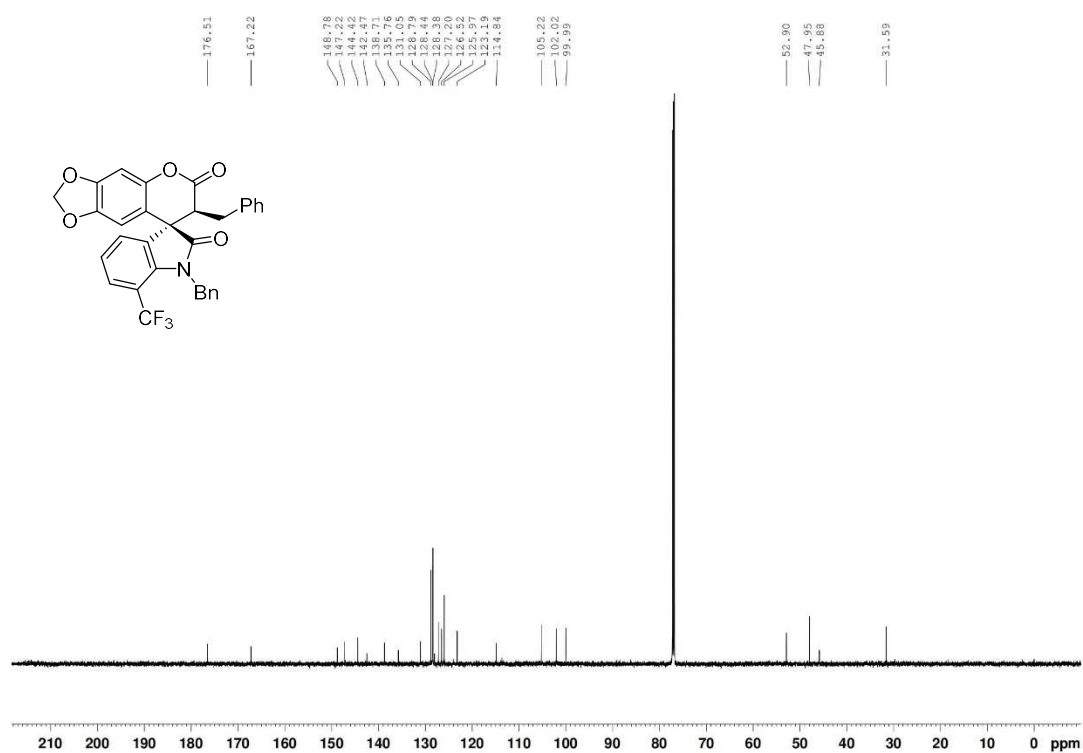

$^{19}\text{F}$  NMR spectrum of compound **3p** ( $\text{CDCl}_3$ , 376 MHz)

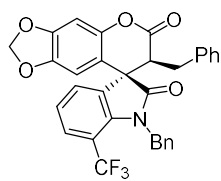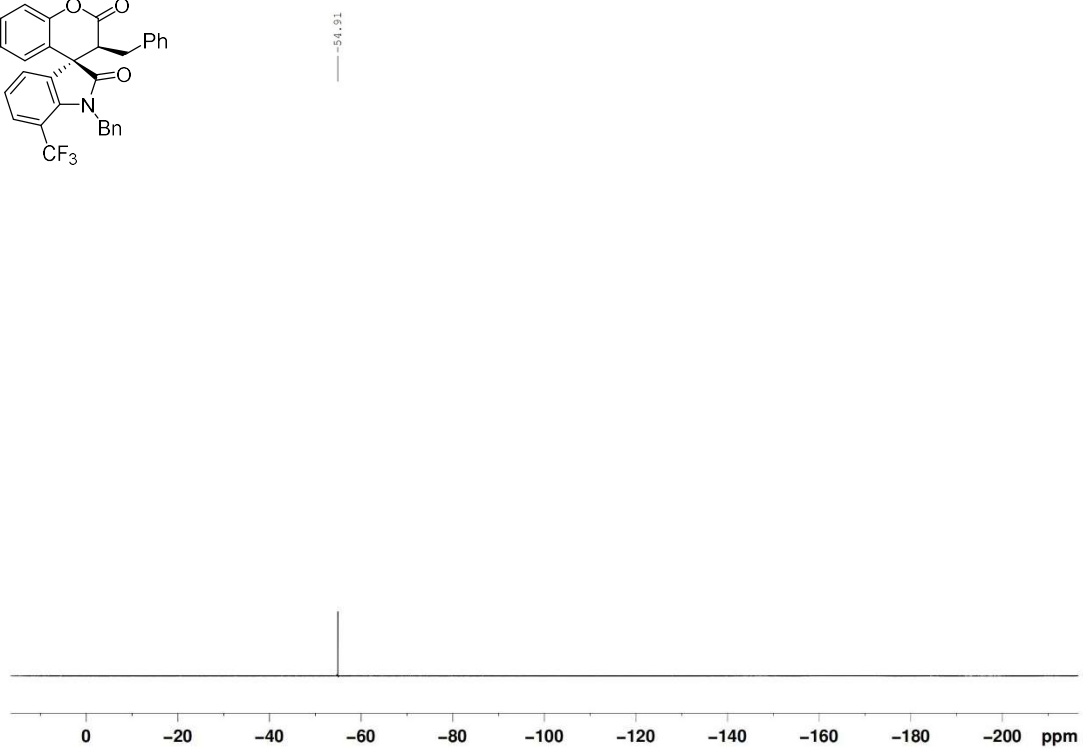

$^1\text{H}$  NMR spectrum of compound **3q** ( $\text{CDCl}_3$ , 400 MHz)

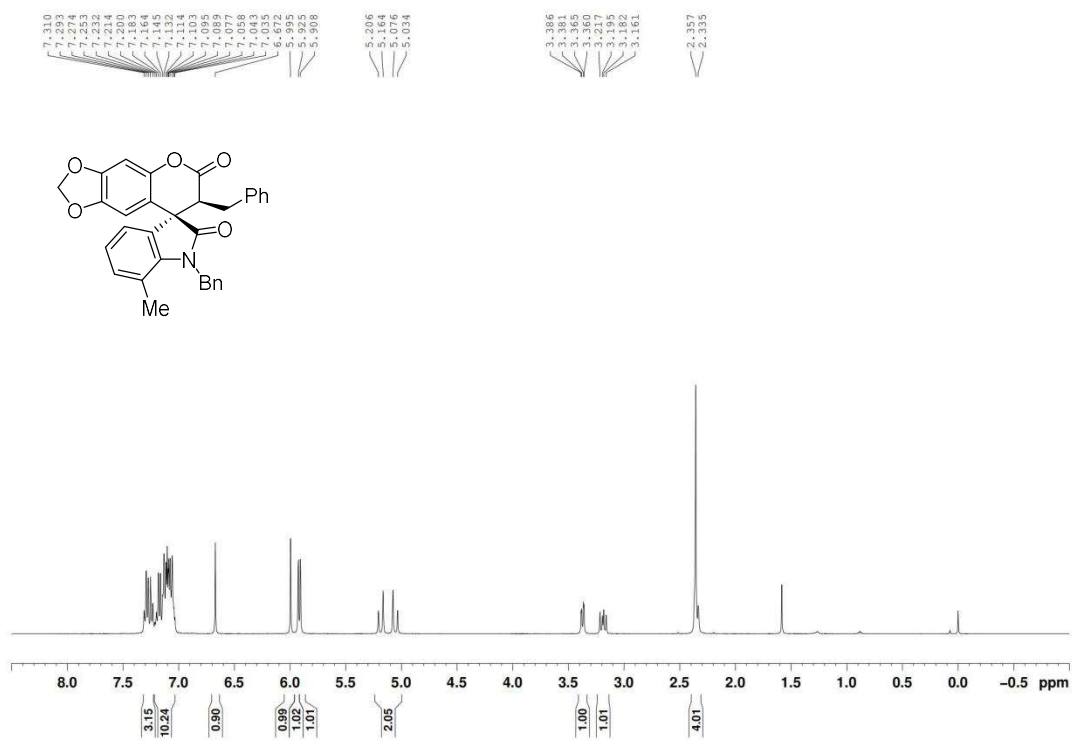

$^{13}\text{C}$  NMR spectrum of compound **3q** ( $\text{CDCl}_3$ , 100 MHz)

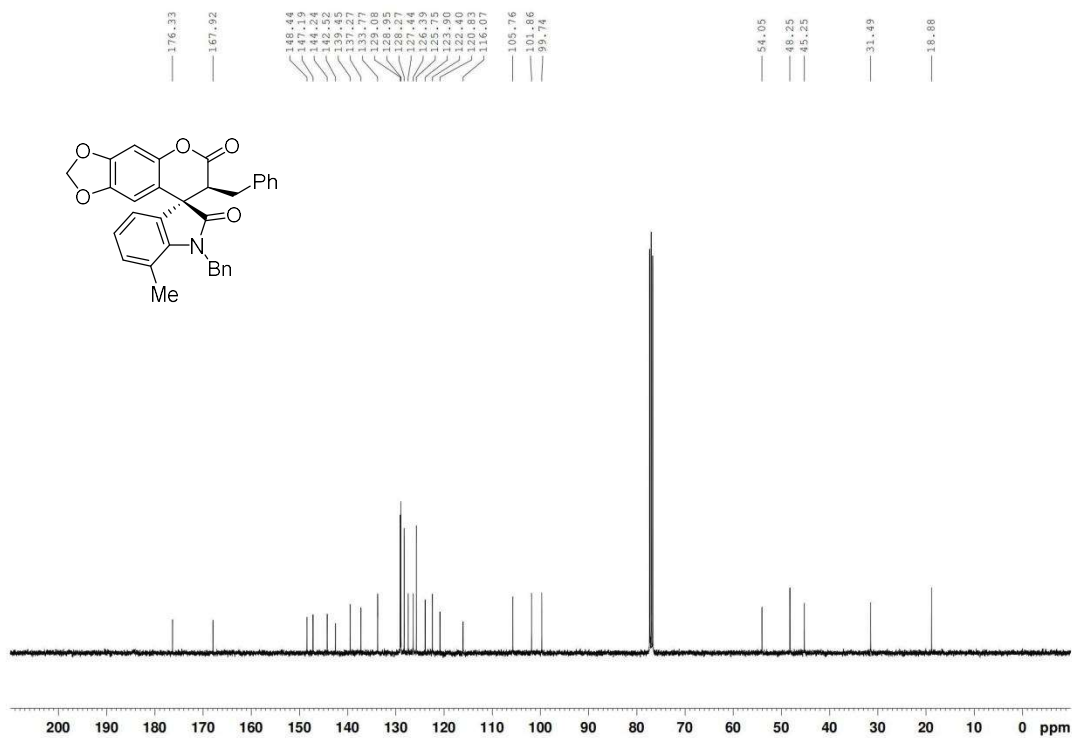



$^1\text{H}$  NMR spectrum of compound **3r** ( $\text{CDCl}_3$ , 400 MHz)

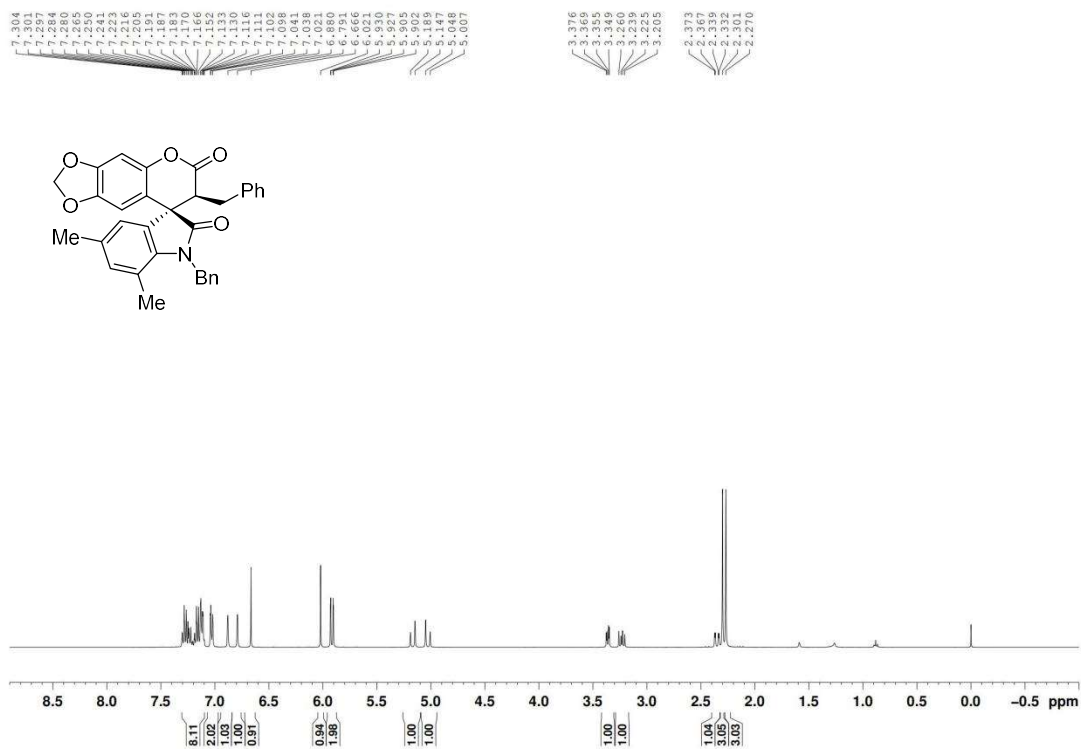

$^{13}\text{C}$  NMR spectrum of compound **3r** ( $\text{CDCl}_3$ , 100 MHz)

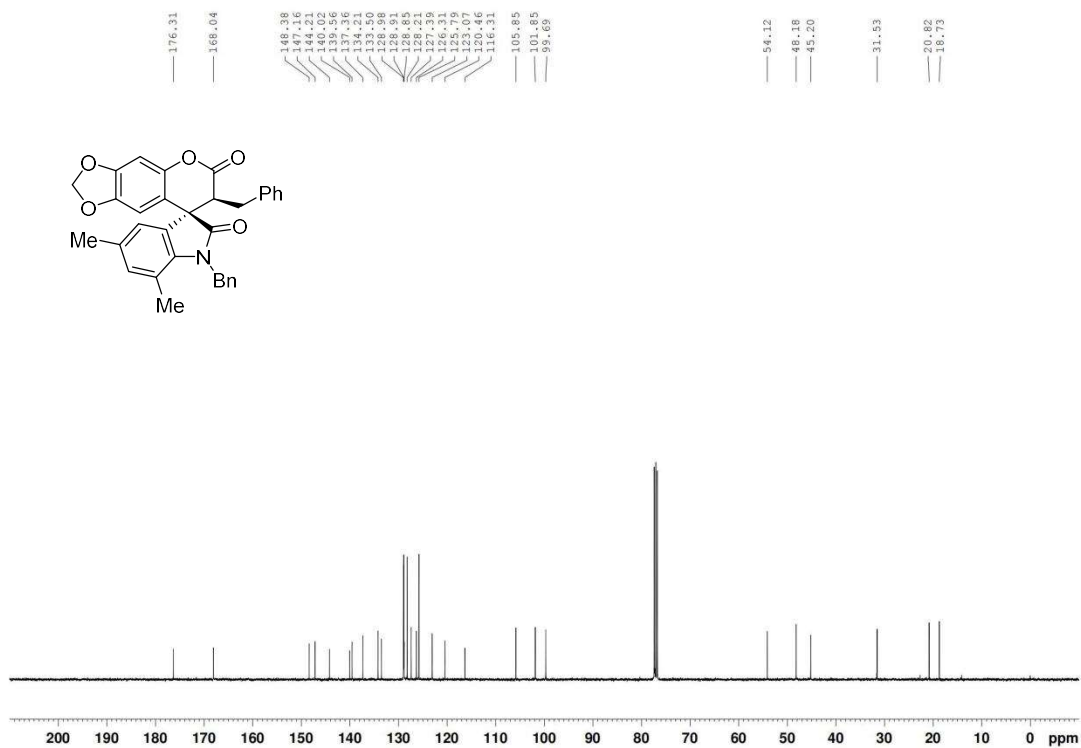

$^1\text{H}$  NMR spectrum of compound **3s** ( $\text{CDCl}_3$ , 400 MHz)

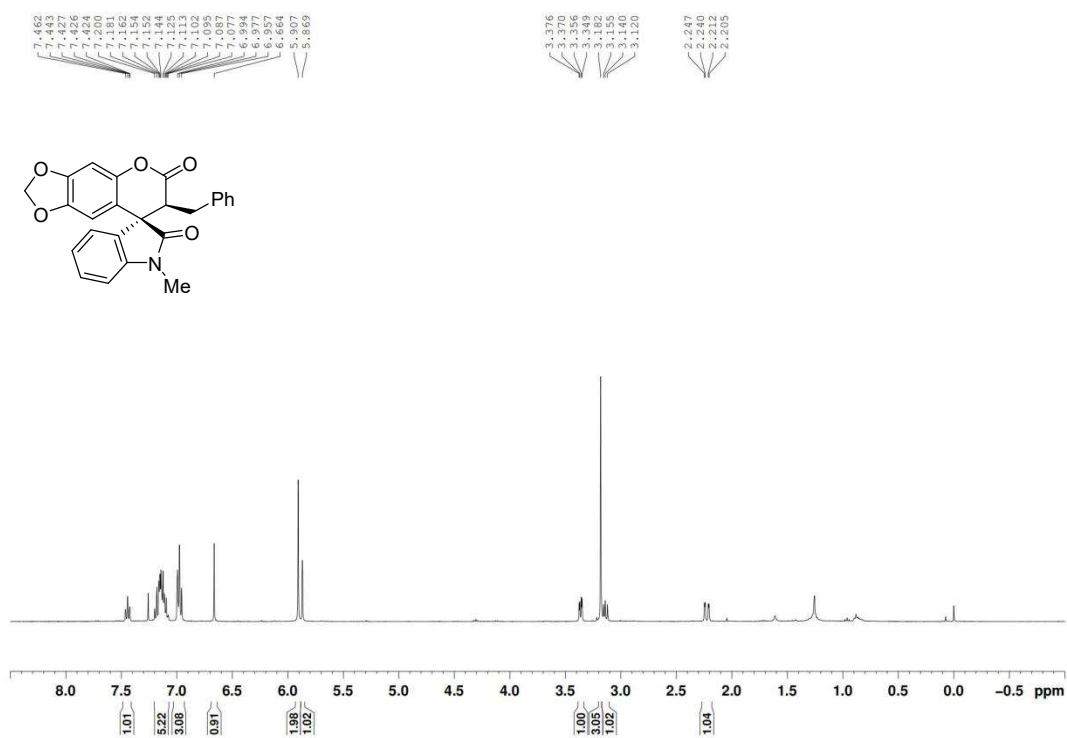

$^{13}\text{C}$  NMR spectrum of compound **3s** ( $\text{CDCl}_3$ , 100 MHz)

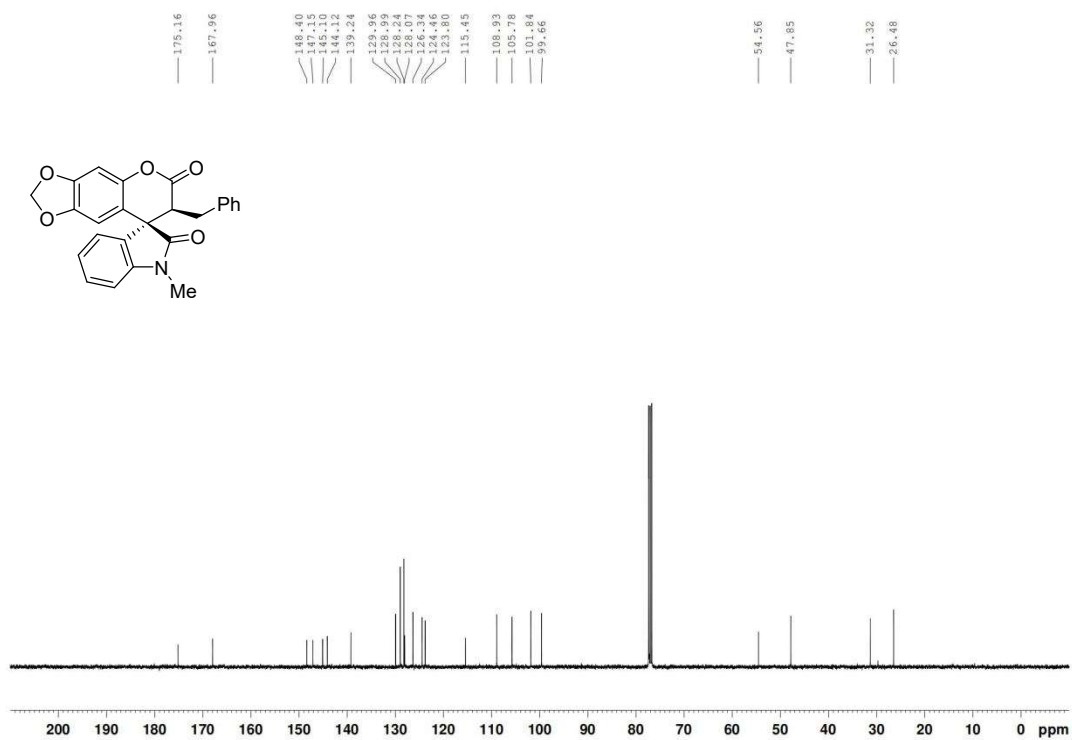

<sup>1</sup>H NMR spectrum of compound **3t** (CDCl<sub>3</sub>, 400 MHz)

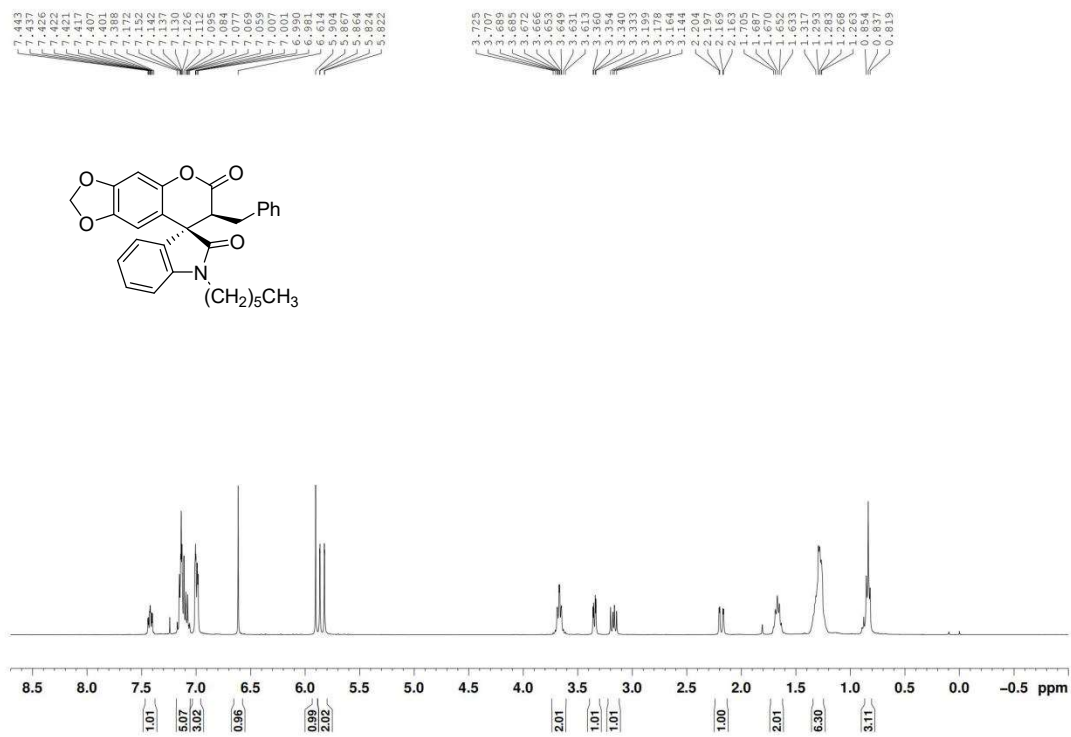

<sup>13</sup>C NMR spectrum of compound **3t** (CDCl<sub>3</sub>, 100 MHz)

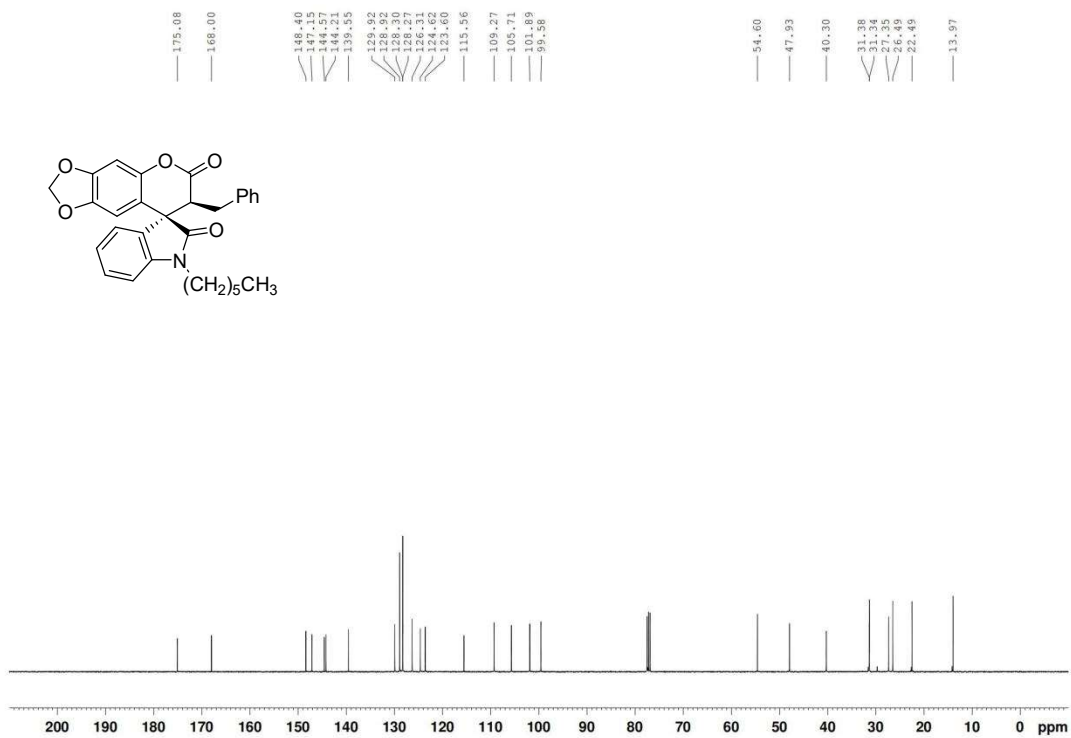

$^1\text{H}$  NMR spectrum of compound **3u** ( $\text{CDCl}_3$ , 400 MHz)

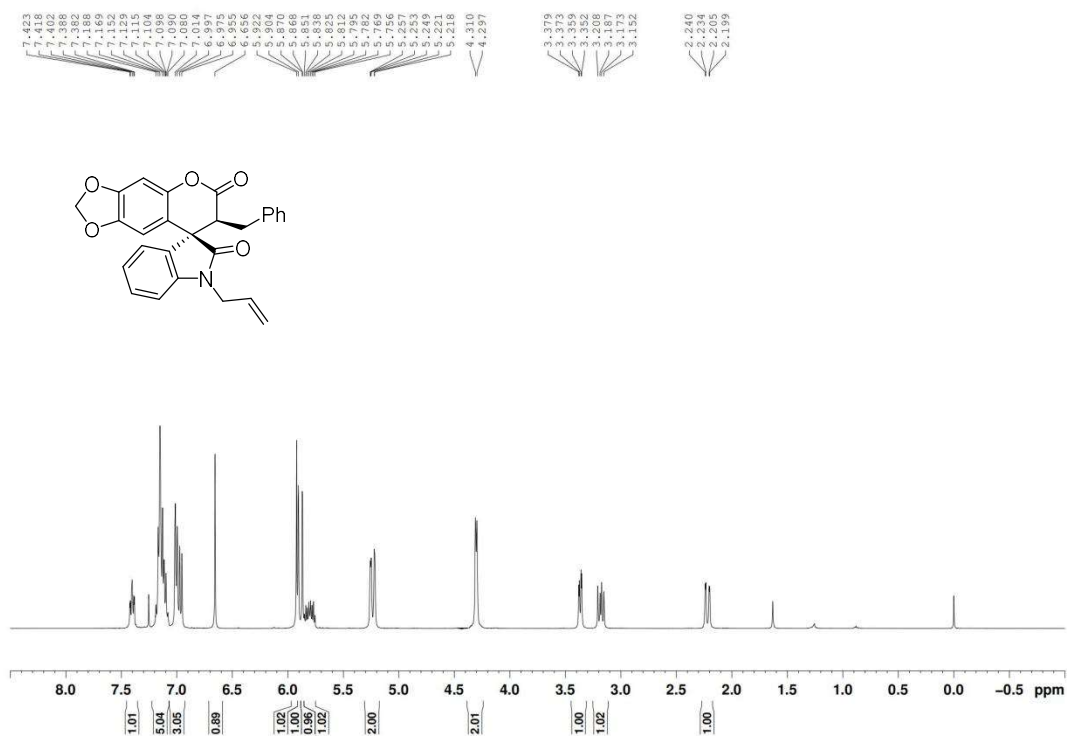

$^{13}\text{C}$  NMR spectrum of compound **3u** ( $\text{CDCl}_3$ , 100 MHz)

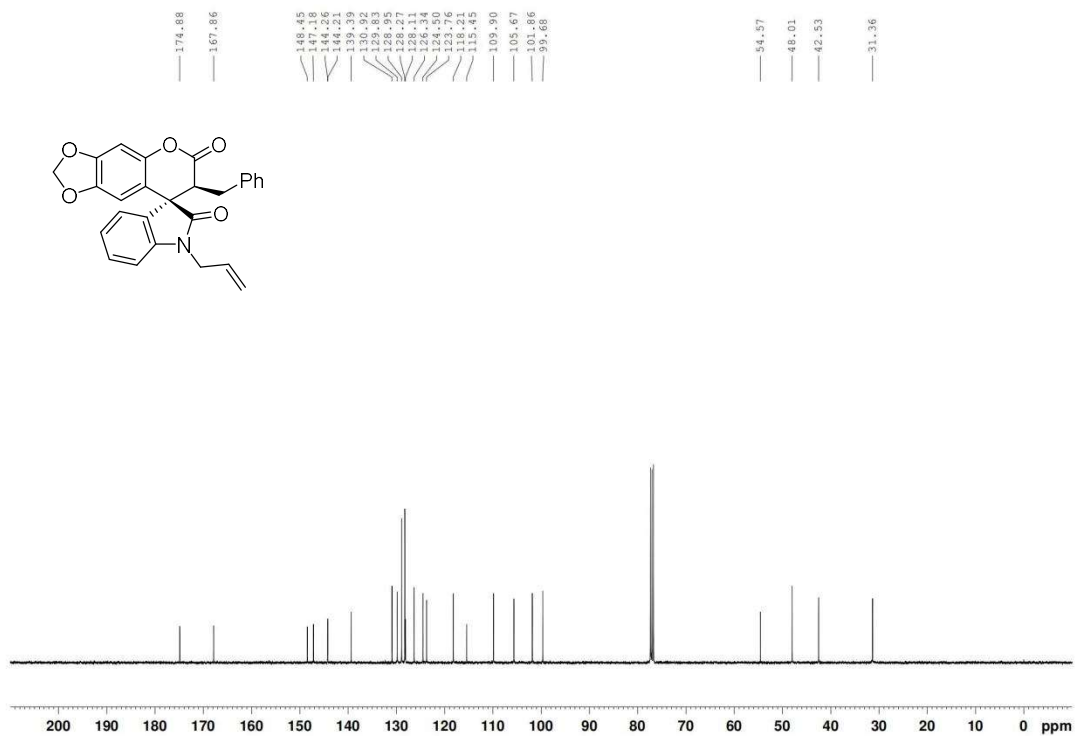

$^1\text{H}$  NMR spectrum of compound **3v** ( $\text{CDCl}_3$ , 400 MHz)

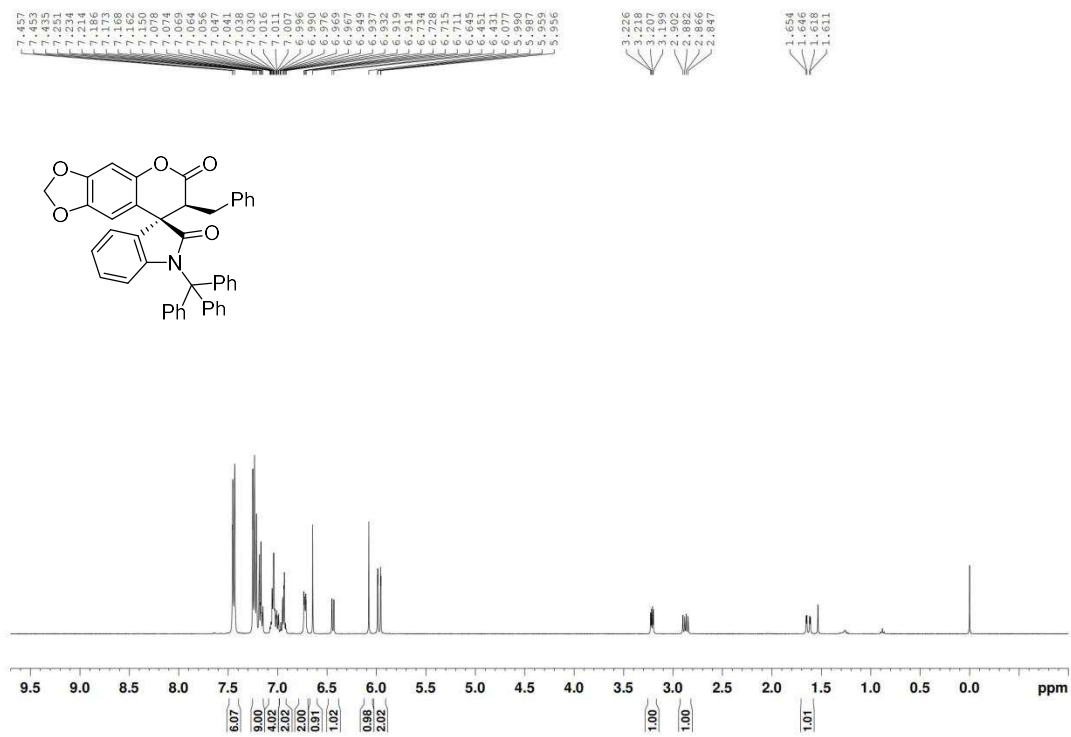

$^{13}\text{C}$  NMR spectrum of compound **3v** ( $\text{CDCl}_3$ , 100 MHz)

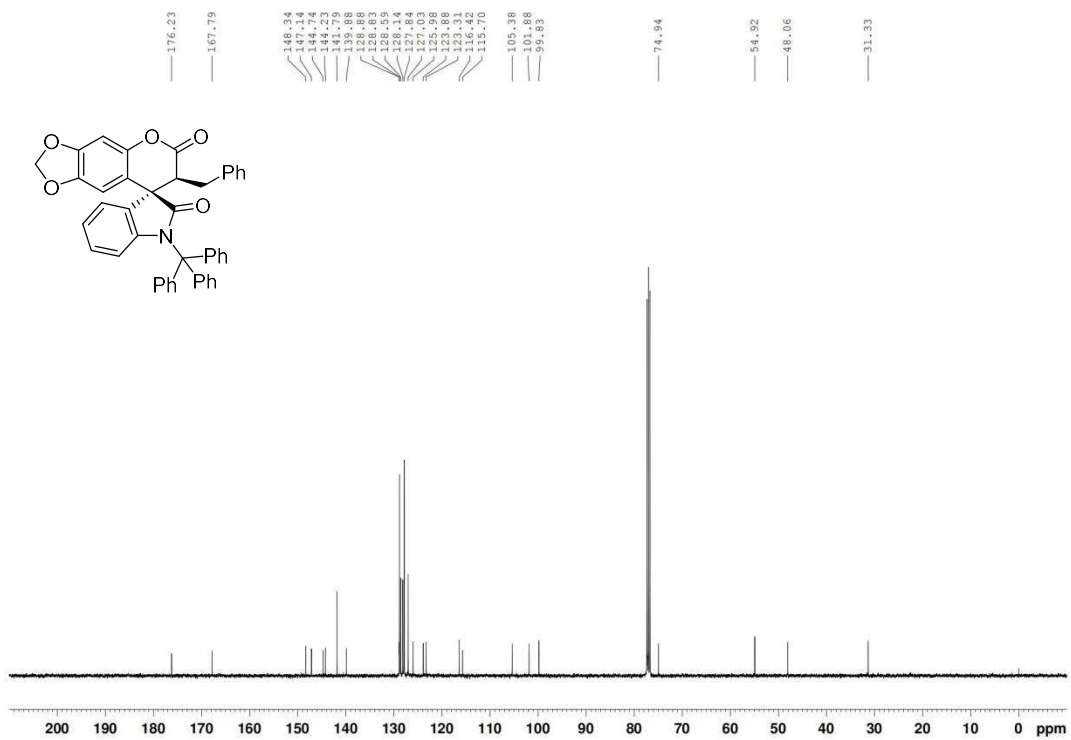

$^1\text{H}$  NMR spectrum of compound **4a** ( $\text{CDCl}_3$ , 400 MHz)

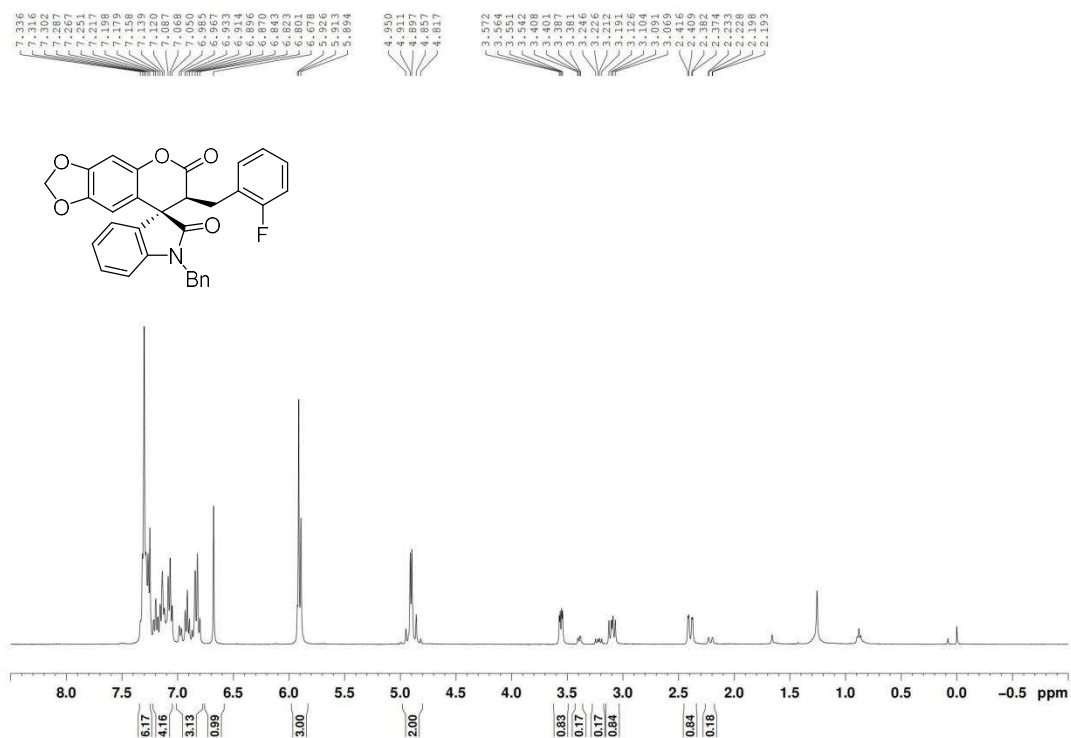

$^{13}\text{C}$  NMR spectrum of compound **4a** ( $\text{CDCl}_3$ , 100 MHz)

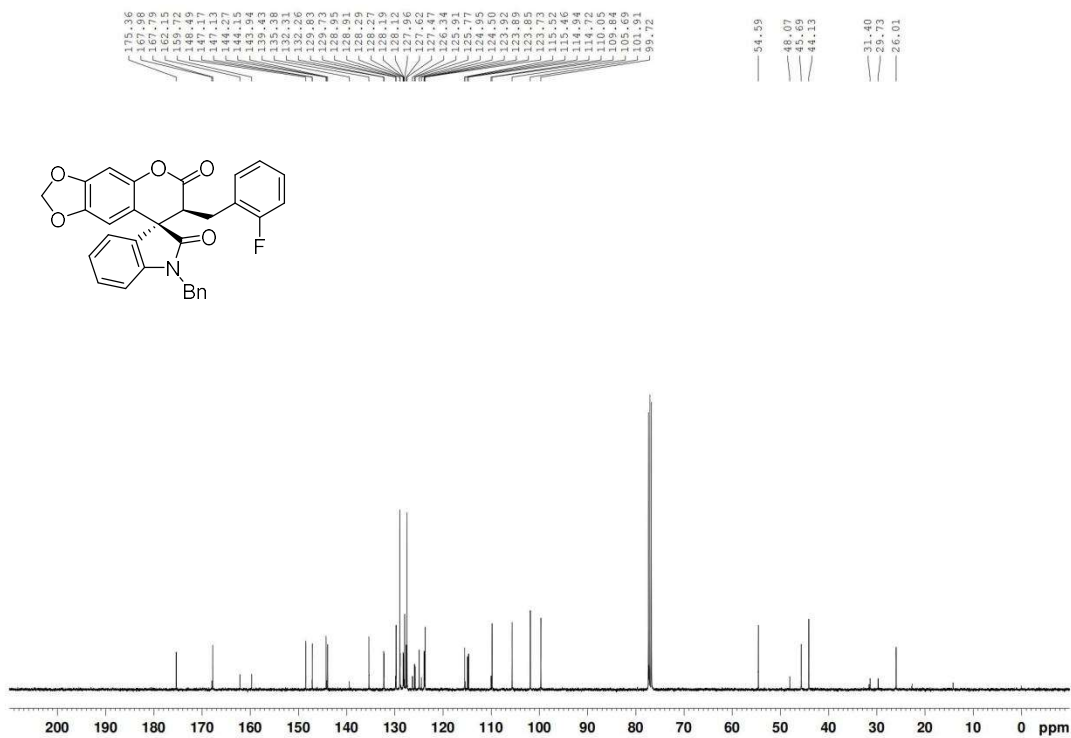

$^{19}\text{F}$  NMR spectrum of compound **4a** ( $\text{CDCl}_3$ , 376 MHz)

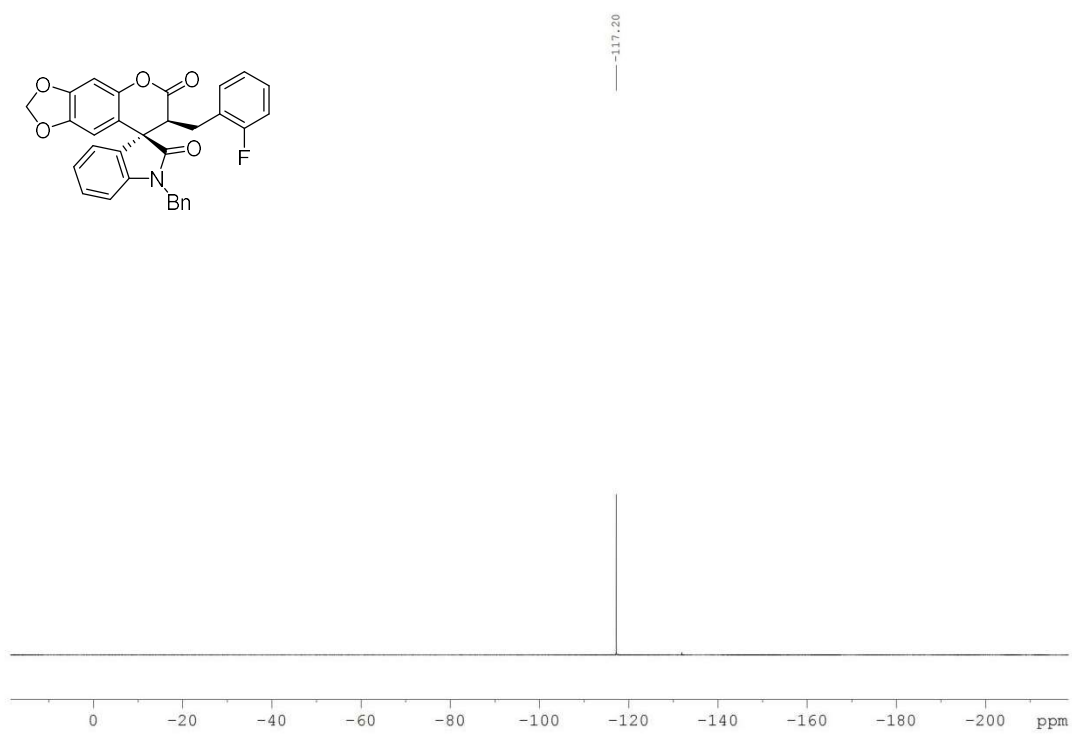

<sup>1</sup>H NMR spectrum of compound **4b** (CDCl<sub>3</sub>, 400 MHz)

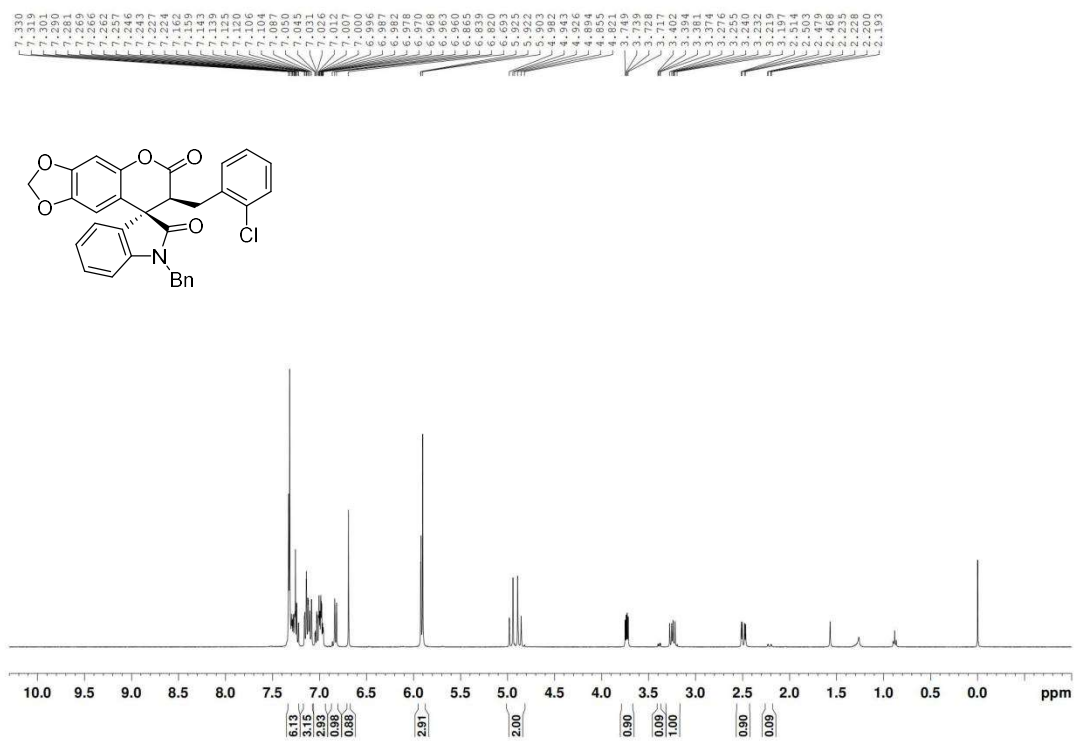

<sup>13</sup>C NMR spectrum of compound **4b** (CDCl<sub>3</sub>, 100 MHz)

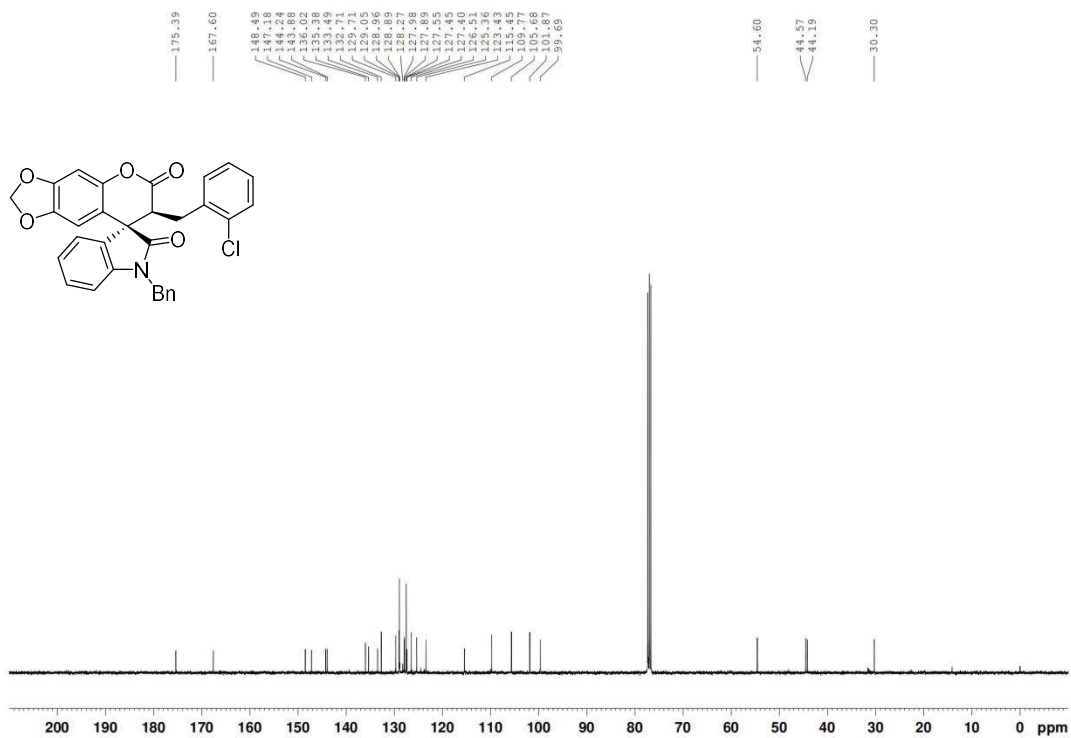



$^1\text{H}$  NMR spectrum of compound **4c** ( $\text{CDCl}_3$ , 400 MHz)

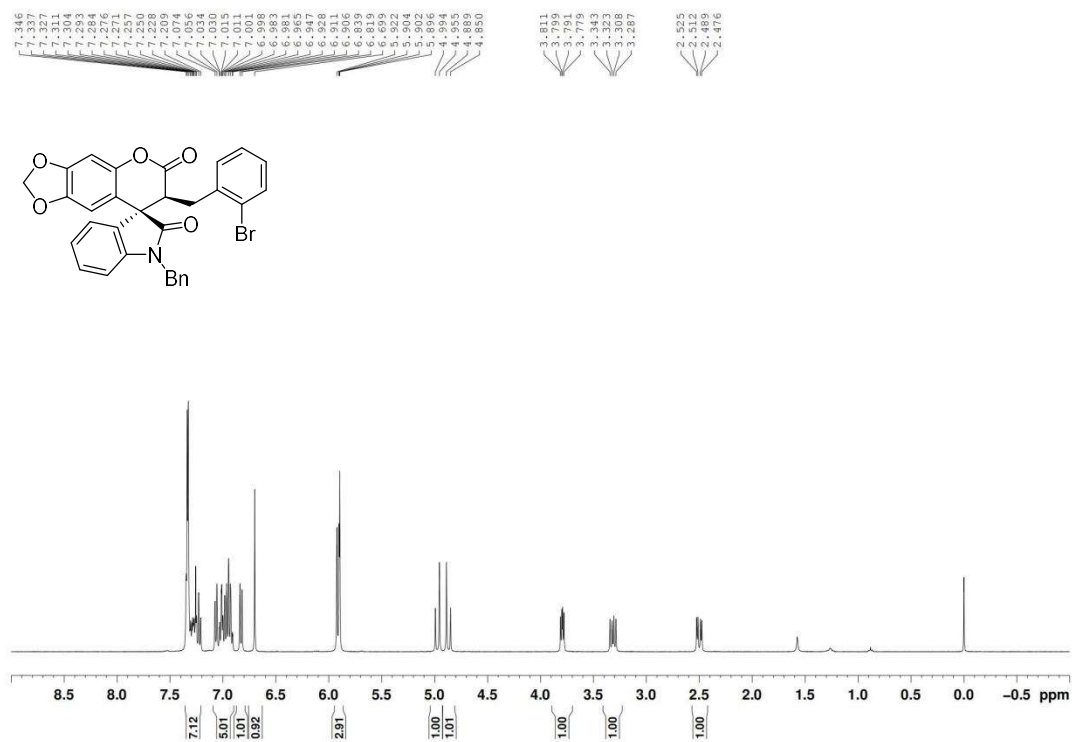

$^{13}\text{C}$  NMR spectrum of compound **4c** ( $\text{CDCl}_3$ , 100 MHz)

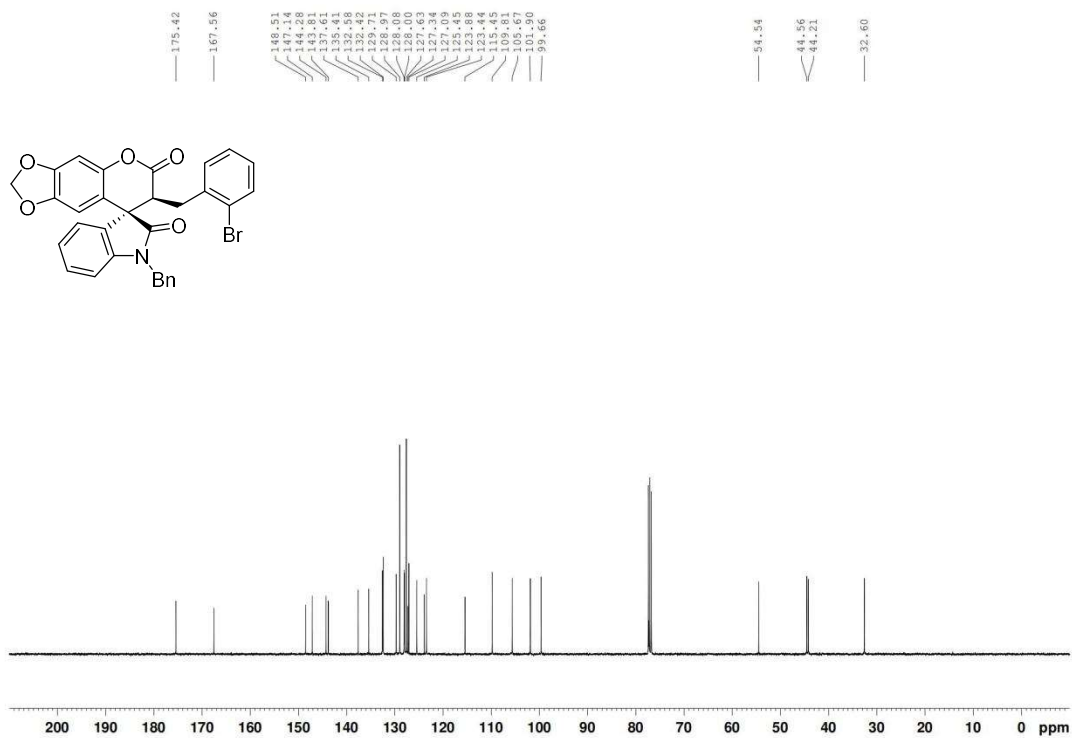

$^1\text{H}$  NMR spectrum of compound **4d** ( $\text{CDCl}_3$ , 400 MHz)

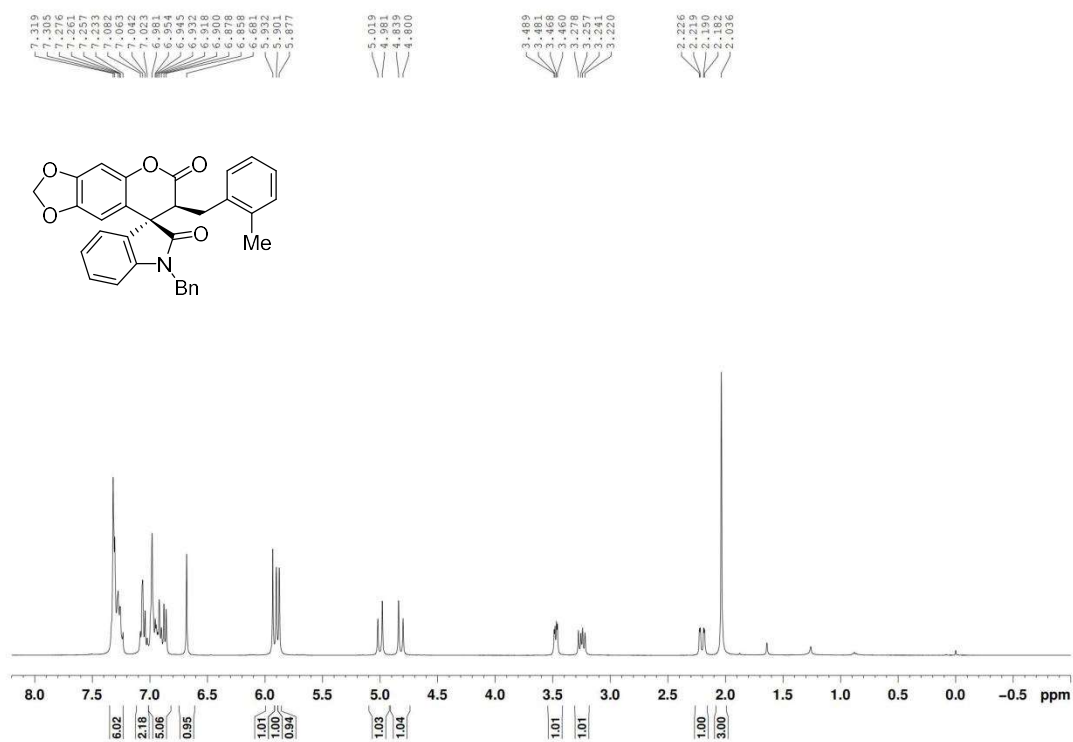

$^{13}\text{C}$  NMR spectrum of compound **4d** ( $\text{CDCl}_3$ , 100 MHz)

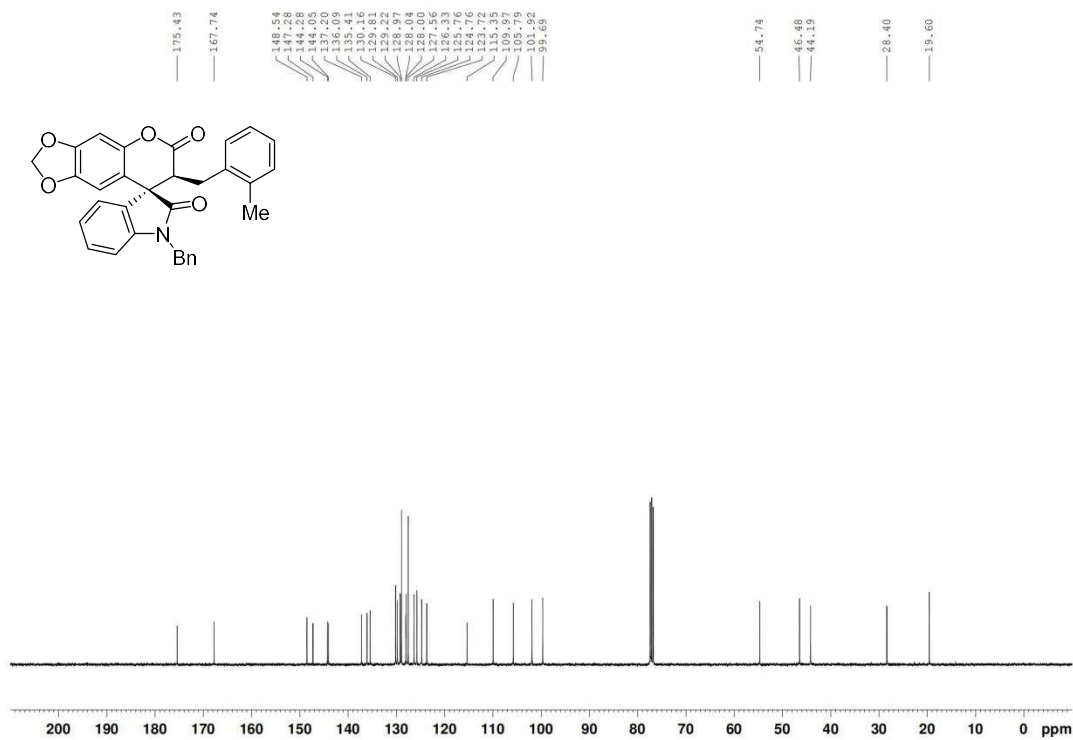

$^1\text{H}$  NMR spectrum of compound **4e** ( $\text{CDCl}_3$ , 400 MHz)

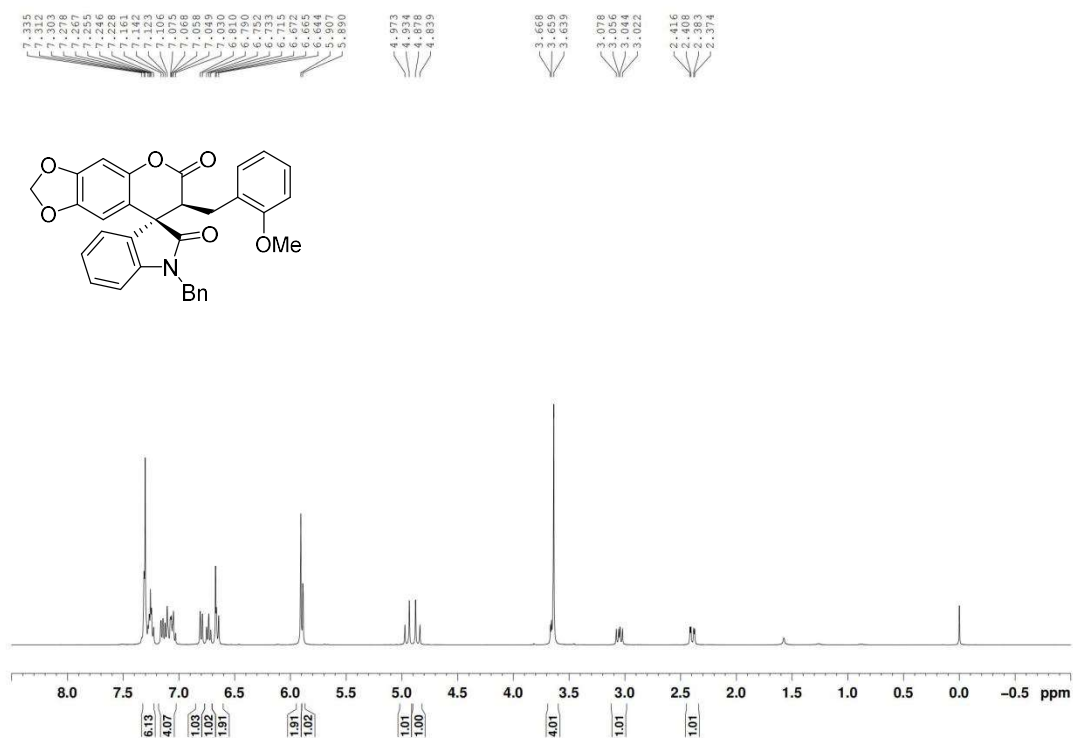

$^{13}\text{C}$  NMR spectrum of compound **4e** ( $\text{CDCl}_3$ , 100 MHz)

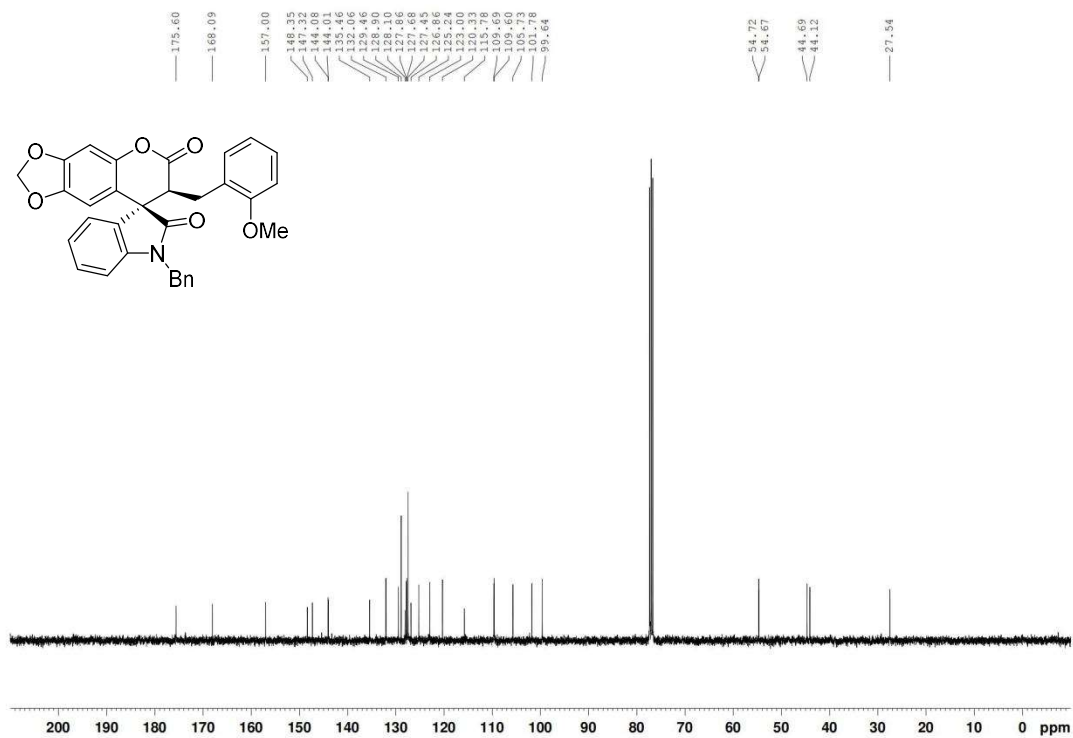

$^1\text{H}$  NMR spectrum of compound **4f** ( $\text{CDCl}_3$ , 400 MHz)

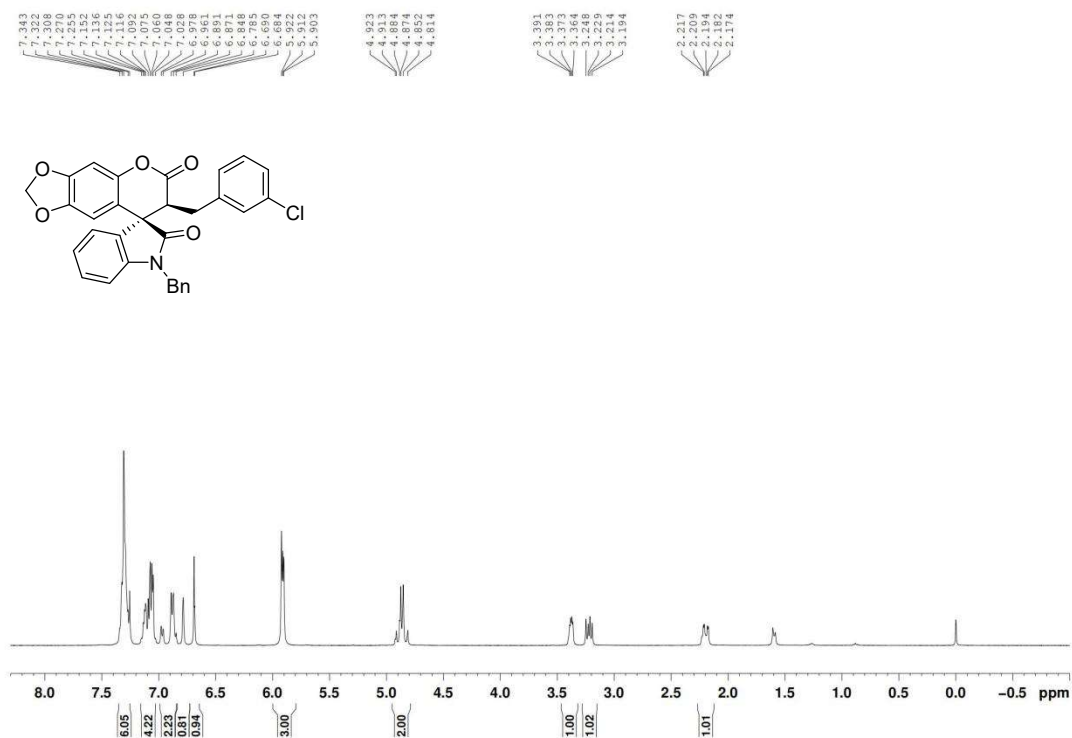

$^{13}\text{C}$  NMR spectrum of compound **4f** ( $\text{CDCl}_3$ , 100 MHz)

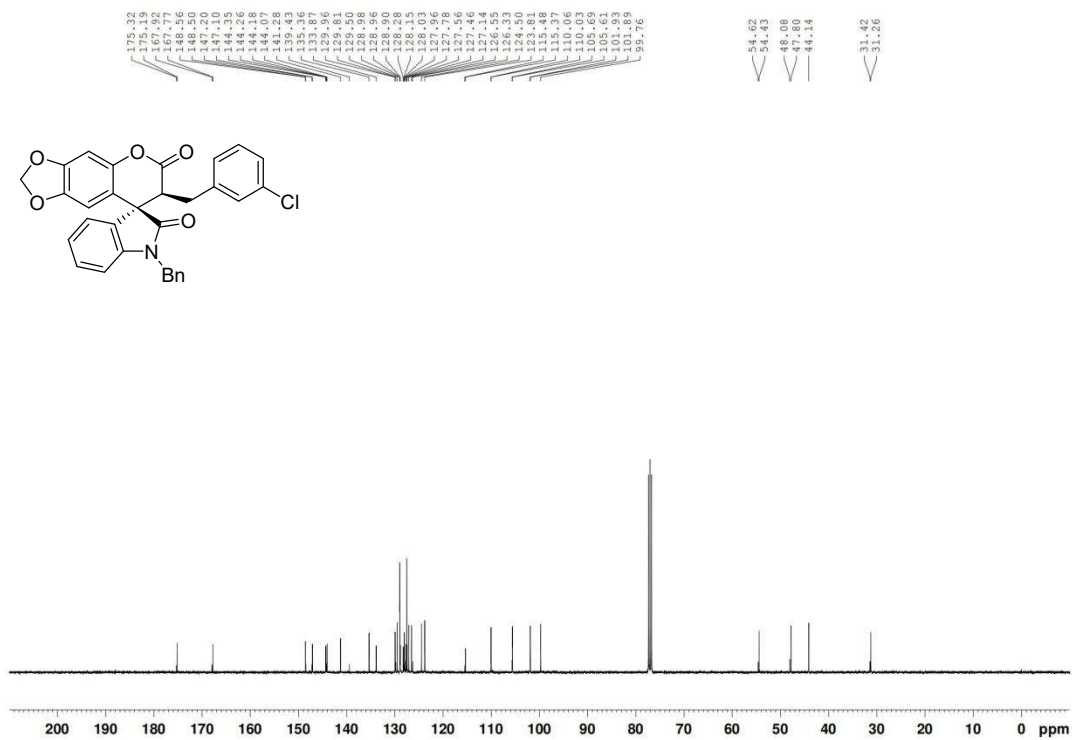

$^1\text{H}$  NMR spectrum of compound **4g** ( $\text{CDCl}_3$ , 400 MHz)

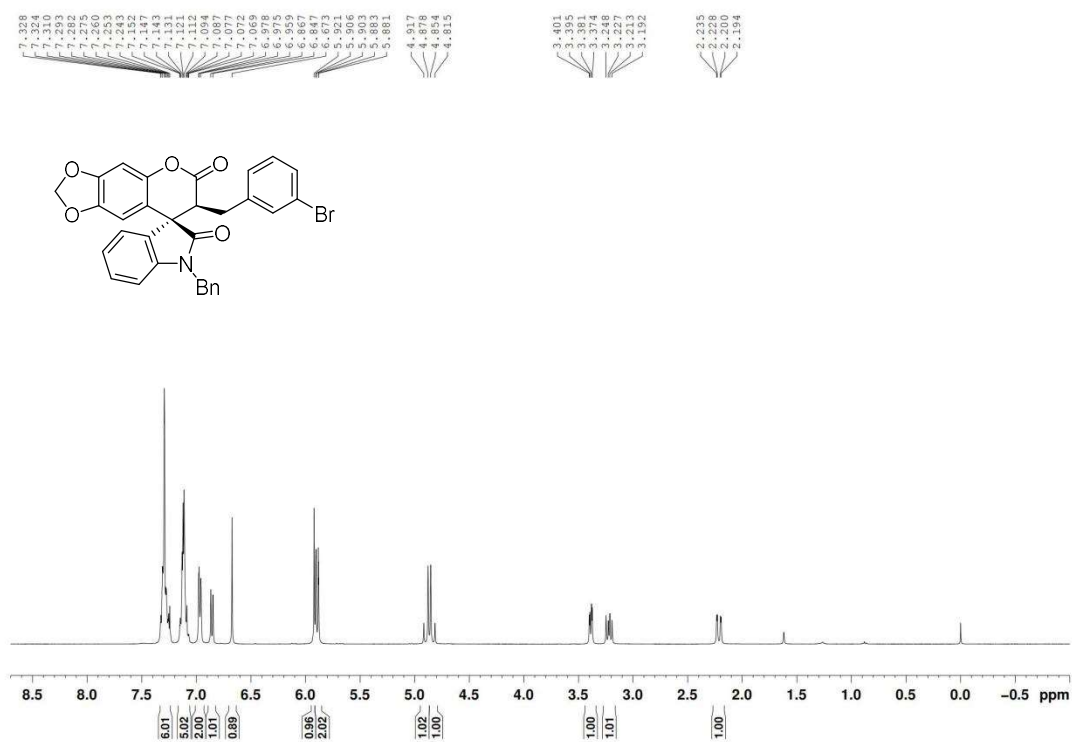

$^{13}\text{C}$  NMR spectrum of compound **4g** ( $\text{CDCl}_3$ , 100 MHz)

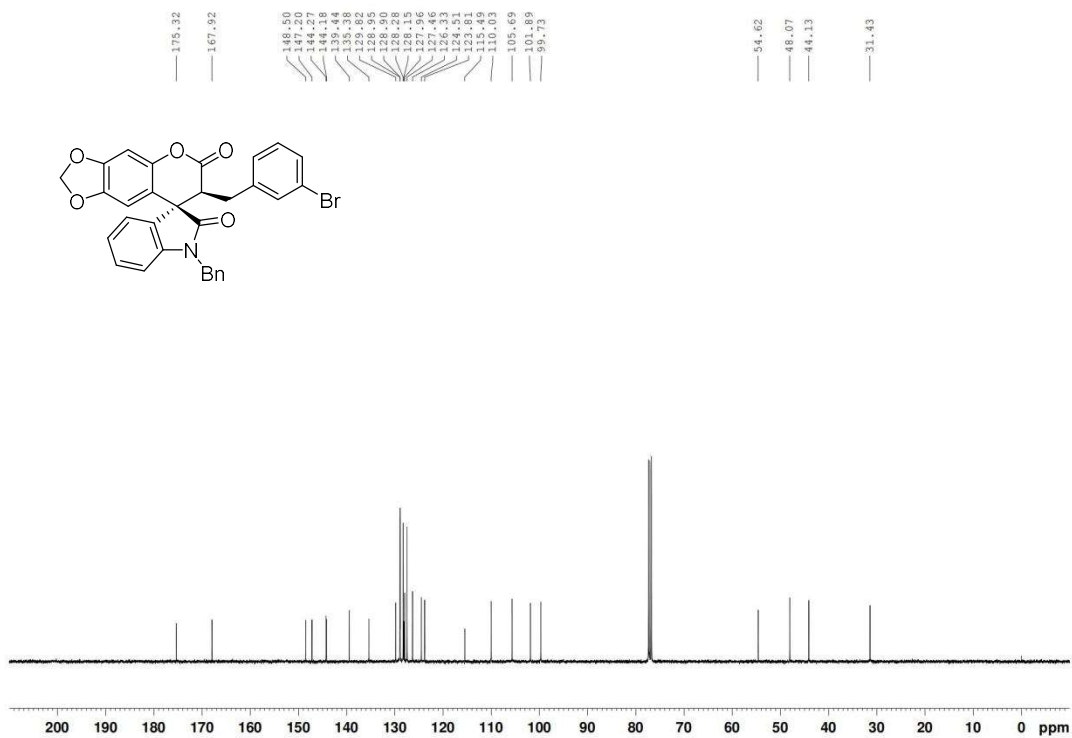

<sup>1</sup>H NMR spectrum of compound **4h** (CDCl<sub>3</sub>, 400 MHz)

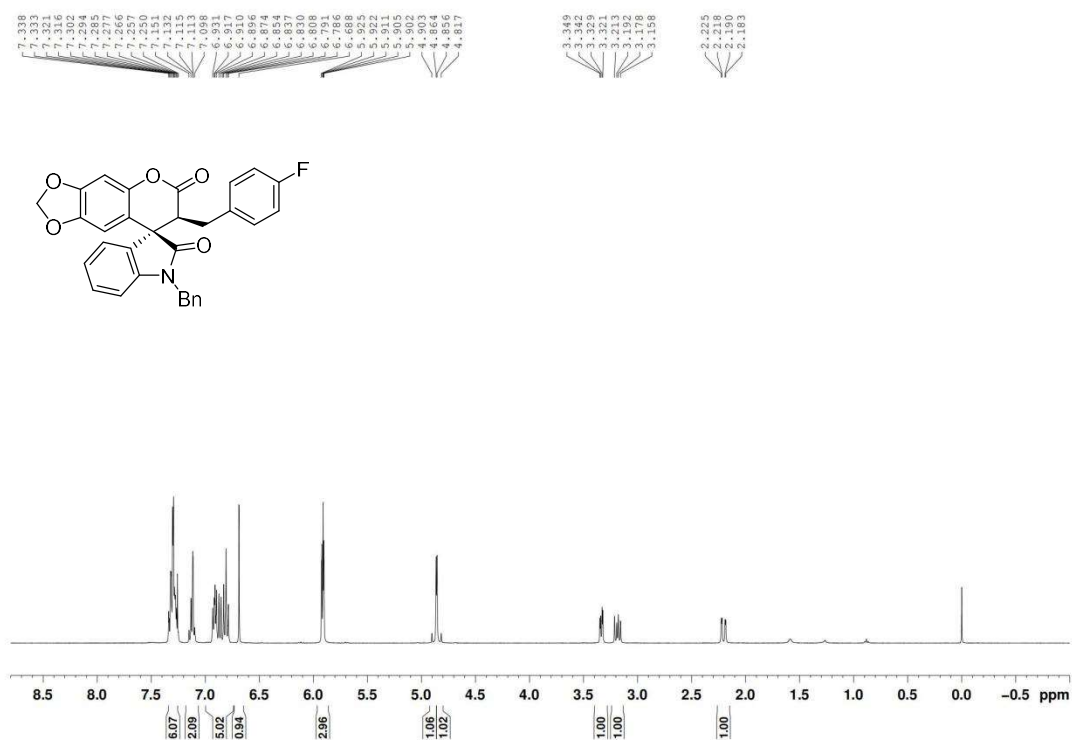

<sup>13</sup>C NMR spectrum of compound **4h** (CDCl<sub>3</sub>, 100 MHz)

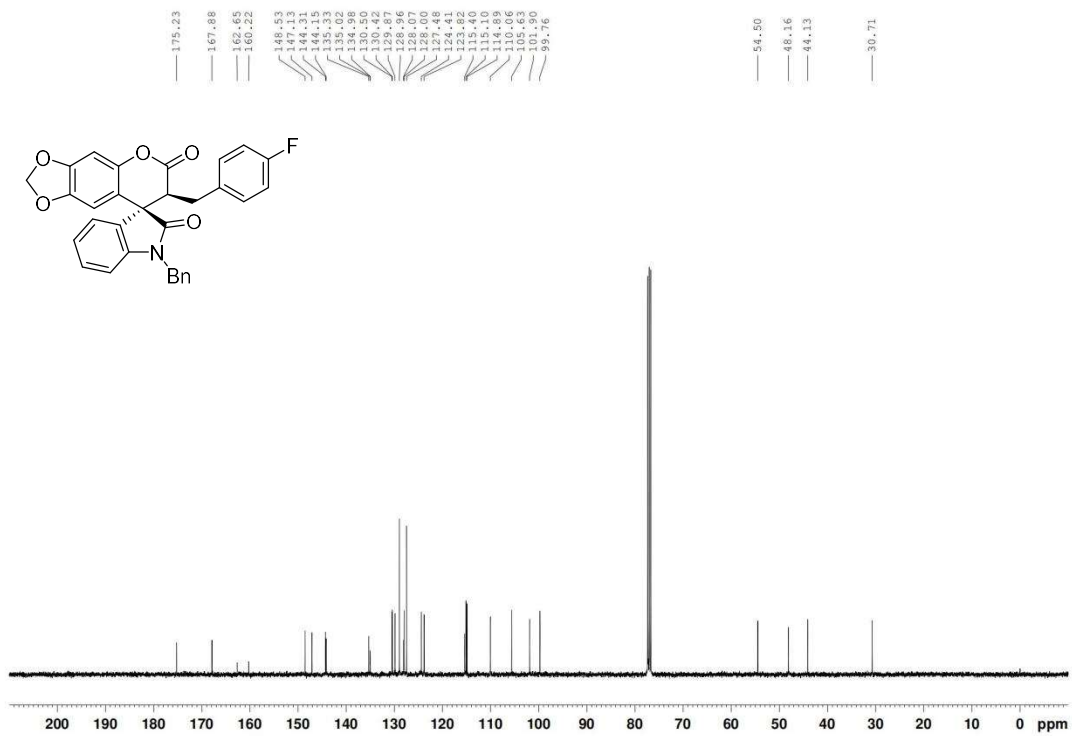

$^{19}\text{F}$  NMR spectrum of compound **4h** ( $\text{CDCl}_3$ , 376 MHz)

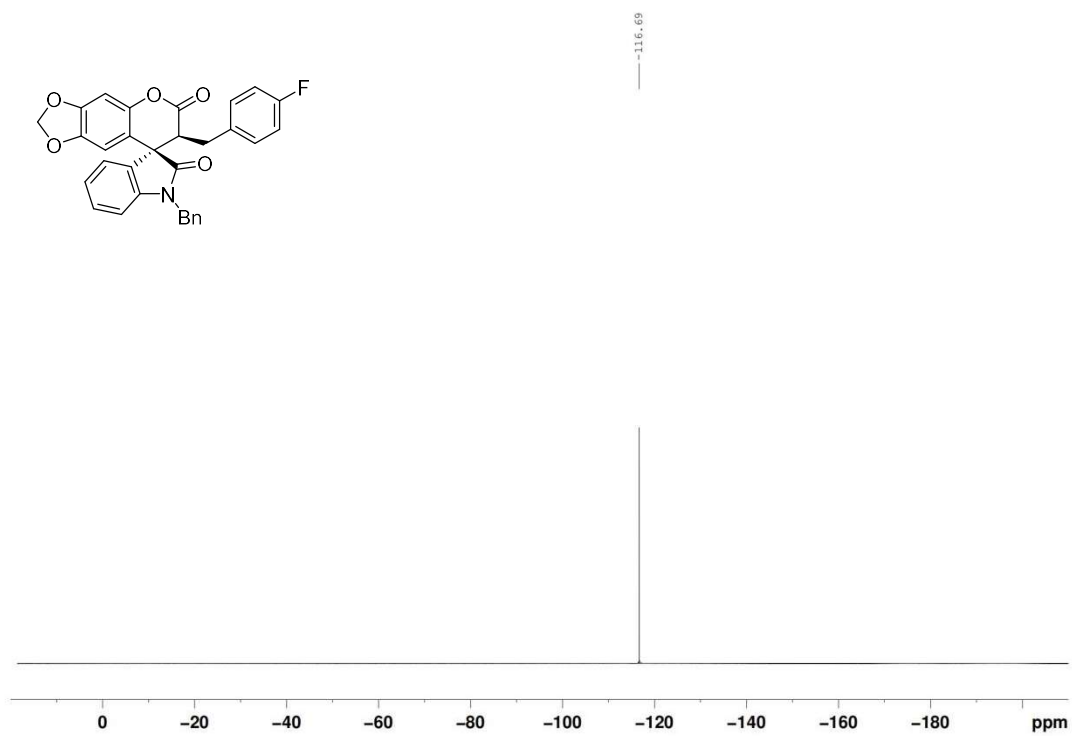

$^1\text{H}$  NMR spectrum of compound **4i** ( $\text{CDCl}_3$ , 400 MHz)

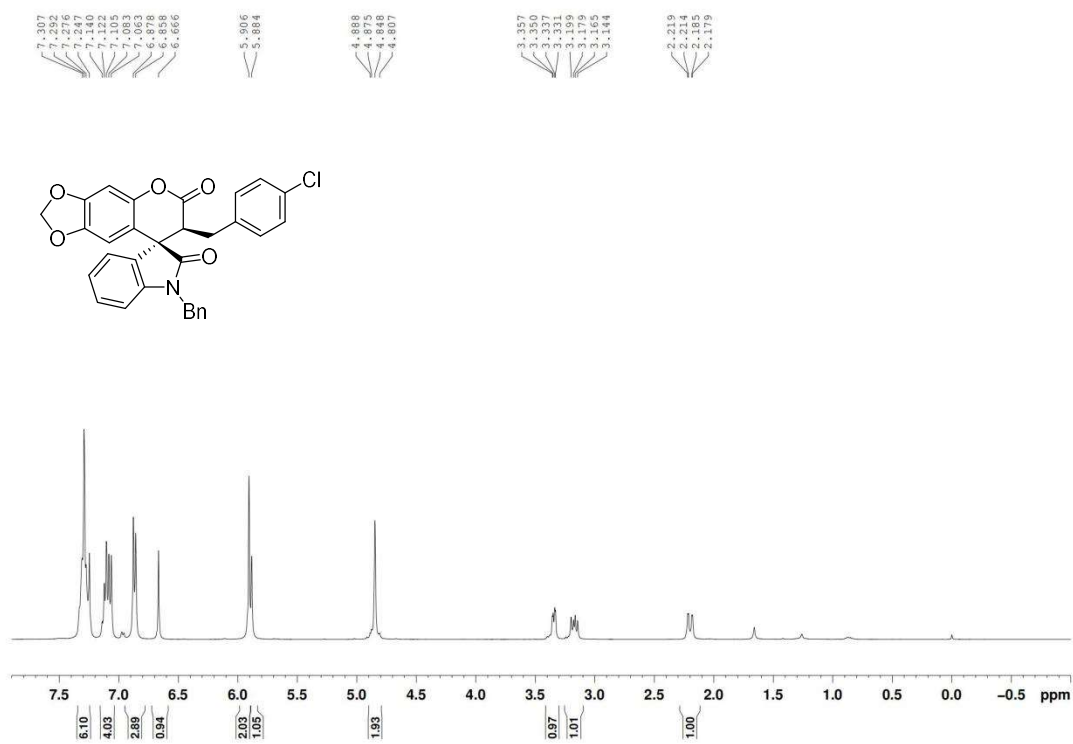

$^{13}\text{C}$  NMR spectrum of compound **4i** ( $\text{CDCl}_3$ , 100 MHz)

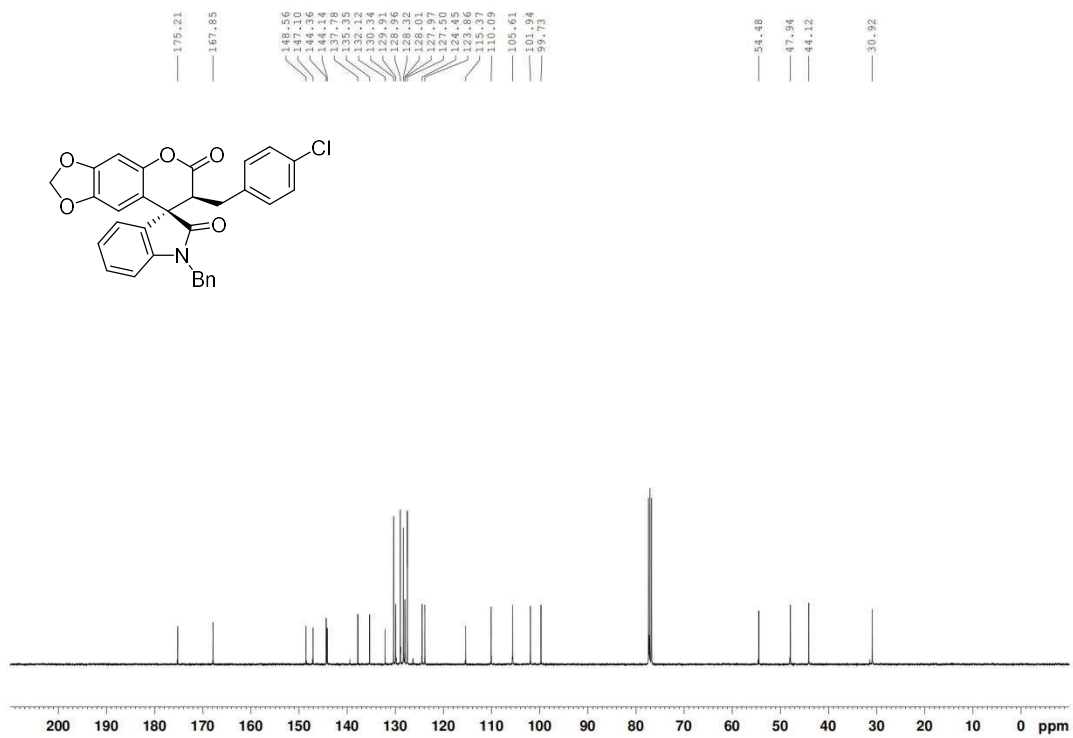



<sup>1</sup>H NMR spectrum of compound **4j** (CDCl<sub>3</sub>, 400 MHz)

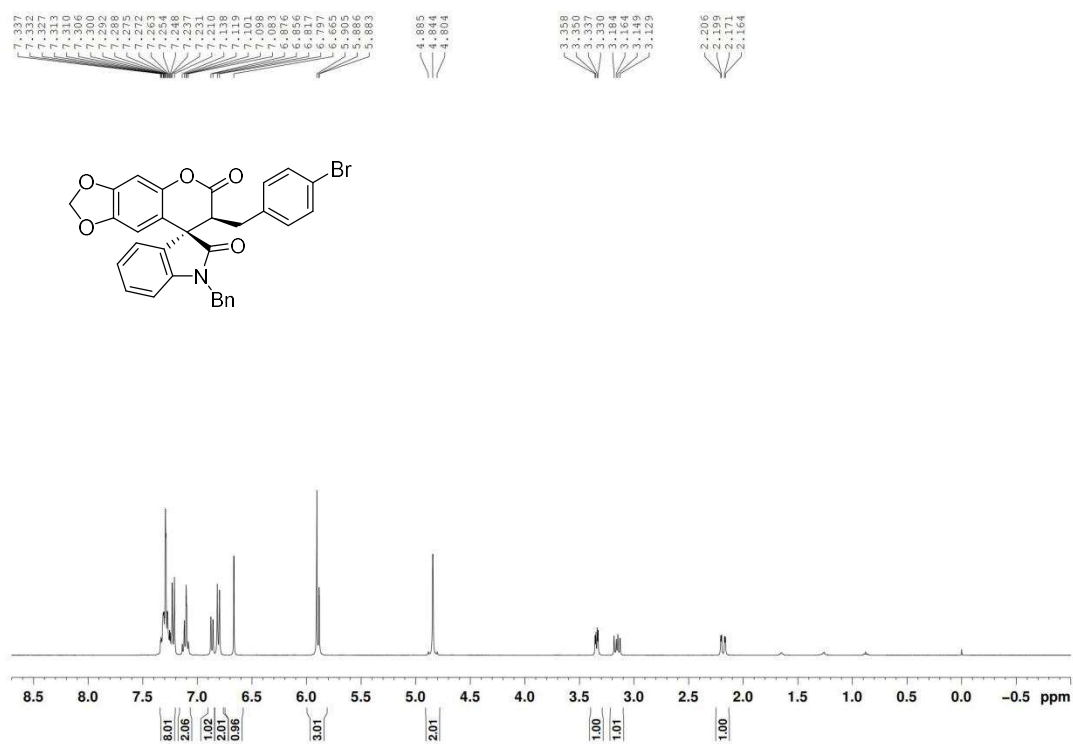

<sup>13</sup>C NMR spectrum of compound **4j** (CDCl<sub>3</sub>, 100 MHz)

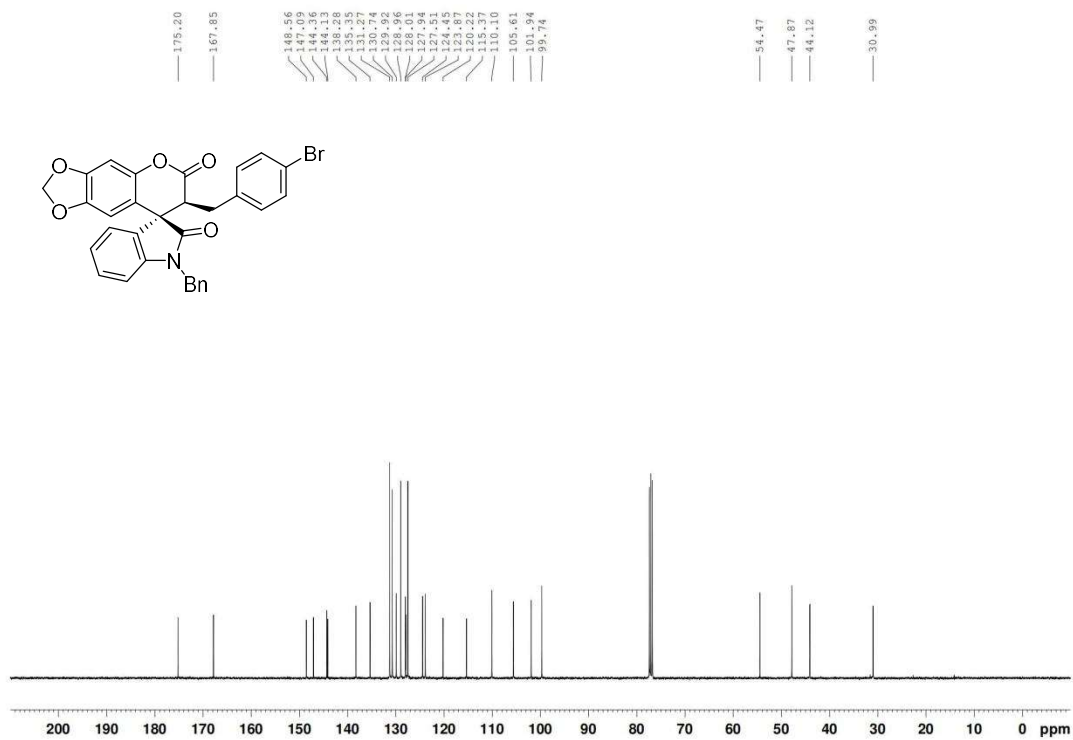





<sup>1</sup>H NMR spectrum of compound **4m** (CDCl<sub>3</sub>, 400 MHz)

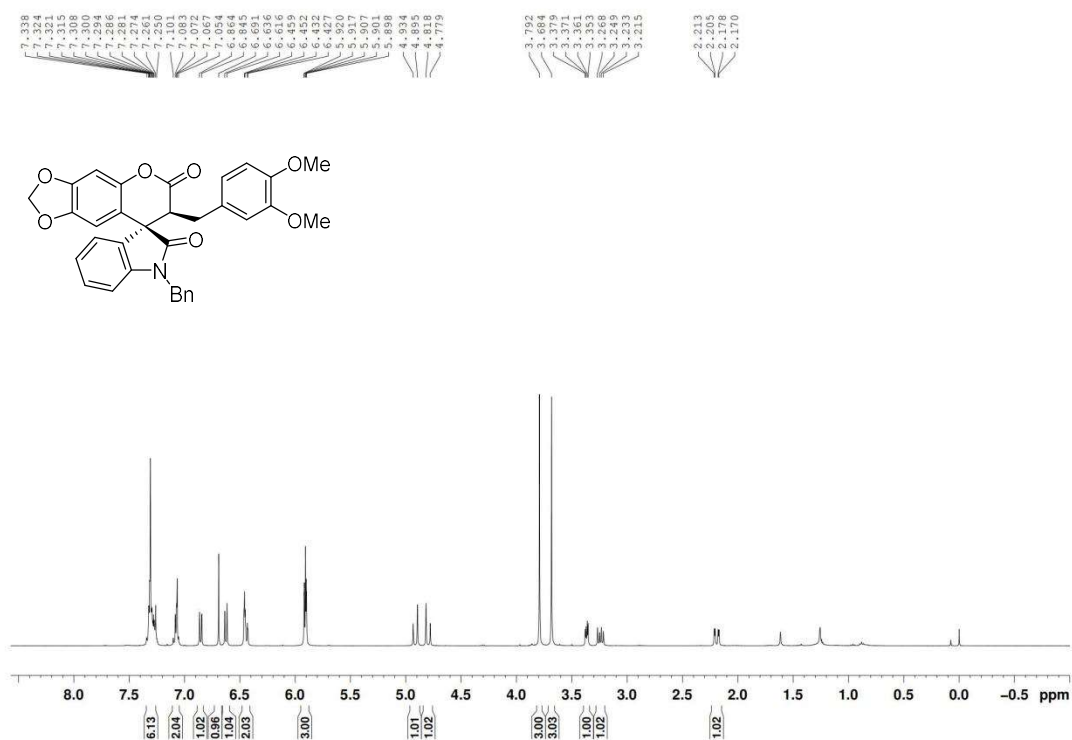

<sup>13</sup>C NMR spectrum of compound **4m** (CDCl<sub>3</sub>, 100 MHz)

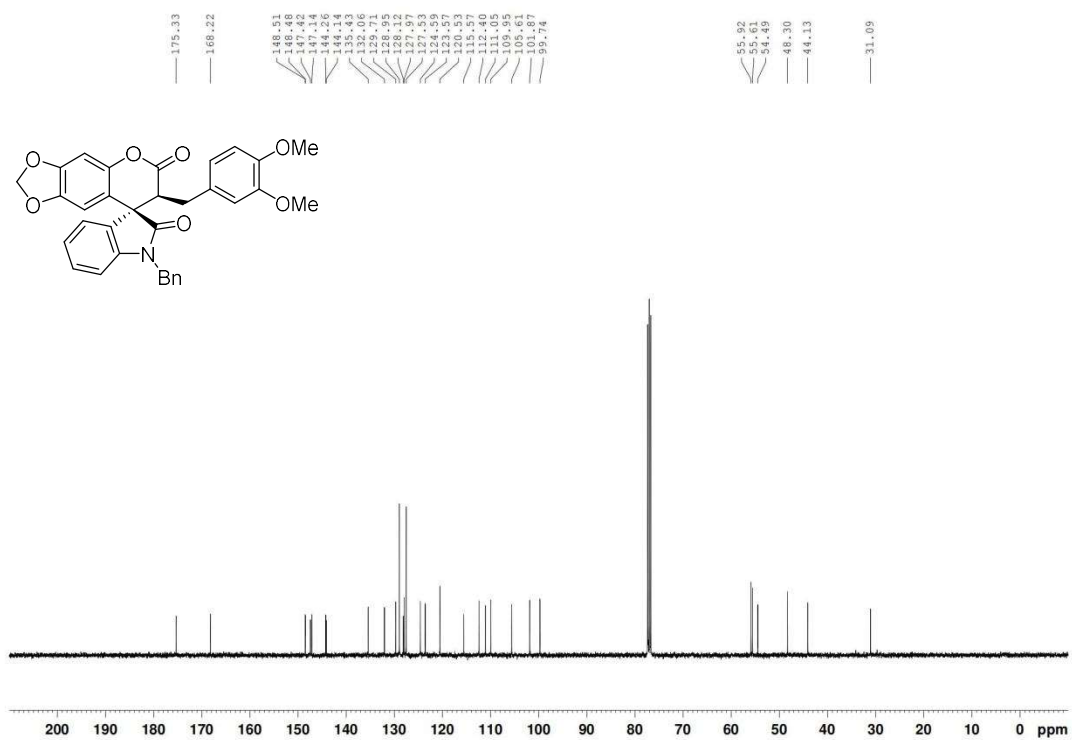

$^1\text{H}$  NMR spectrum of compound **4n** ( $\text{CDCl}_3$ , 600 MHz)

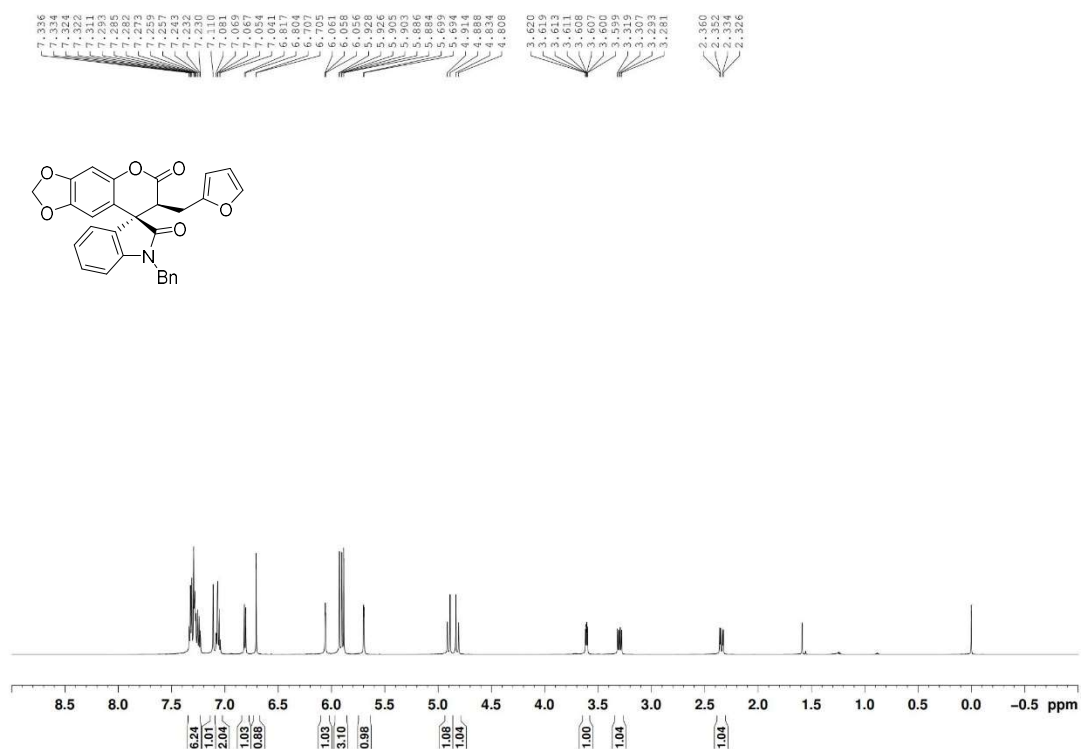

$^{13}\text{C}$  NMR spectrum of compound **4n** ( $\text{CDCl}_3$ , 151 MHz)

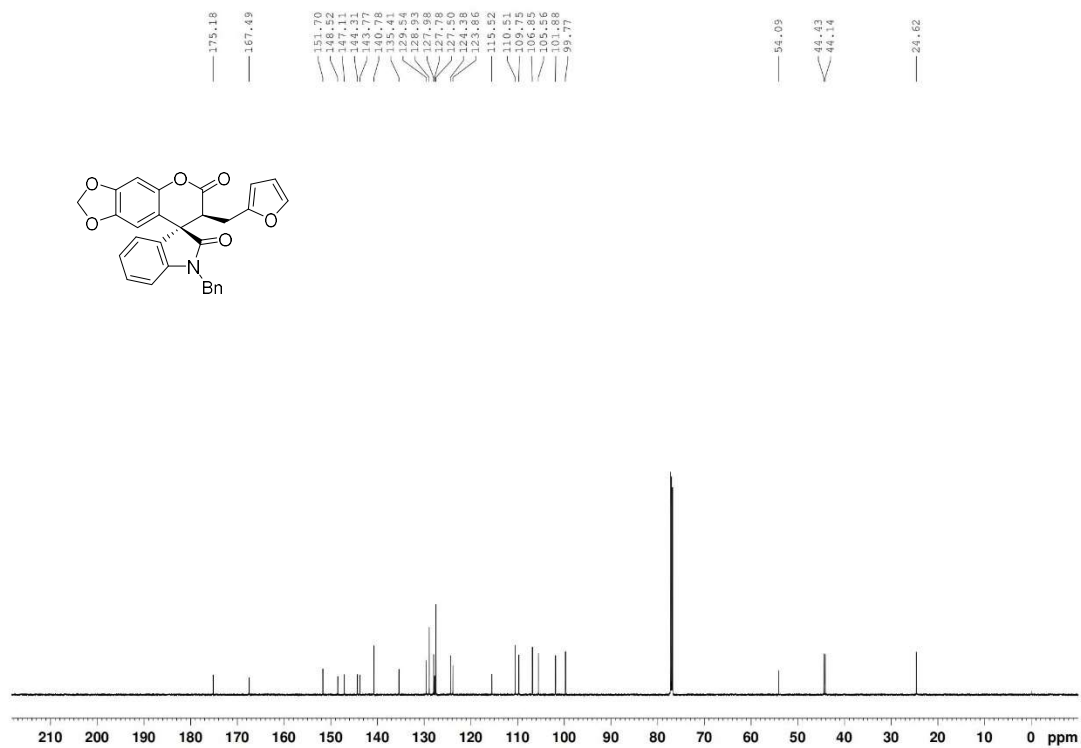

$^1\text{H}$  NMR spectrum of compound **4o** ( $\text{CDCl}_3$ , 600 MHz)

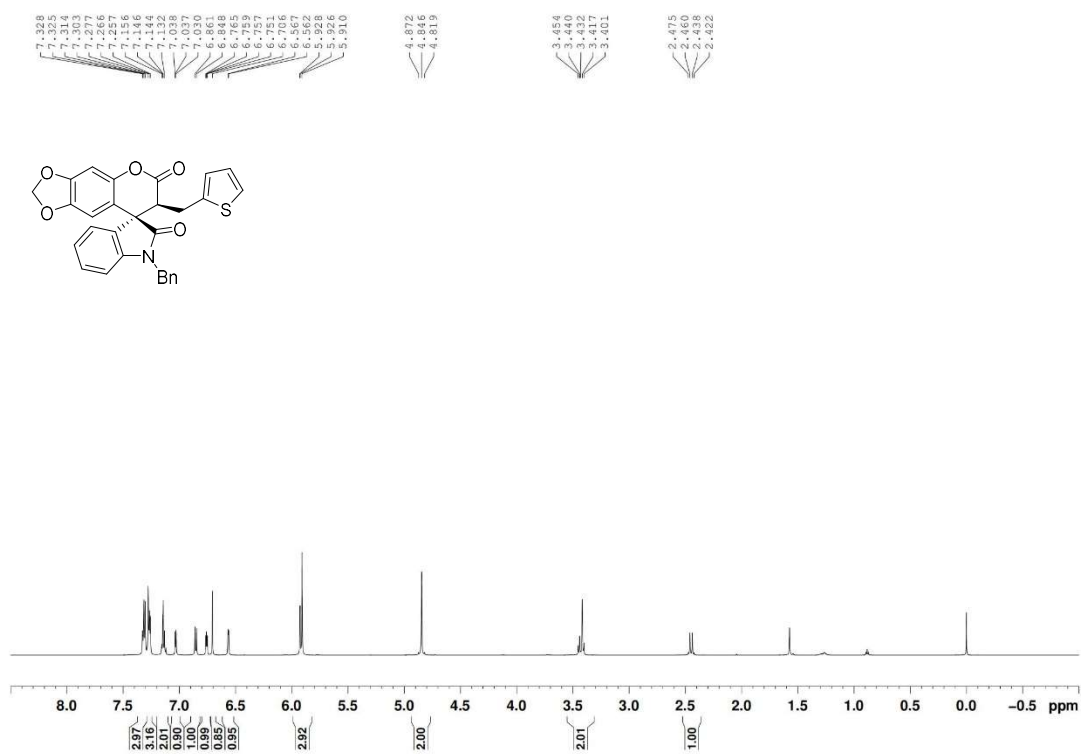

$^{13}\text{C}$  NMR spectrum of compound **4o** ( $\text{CDCl}_3$ , 151 MHz)

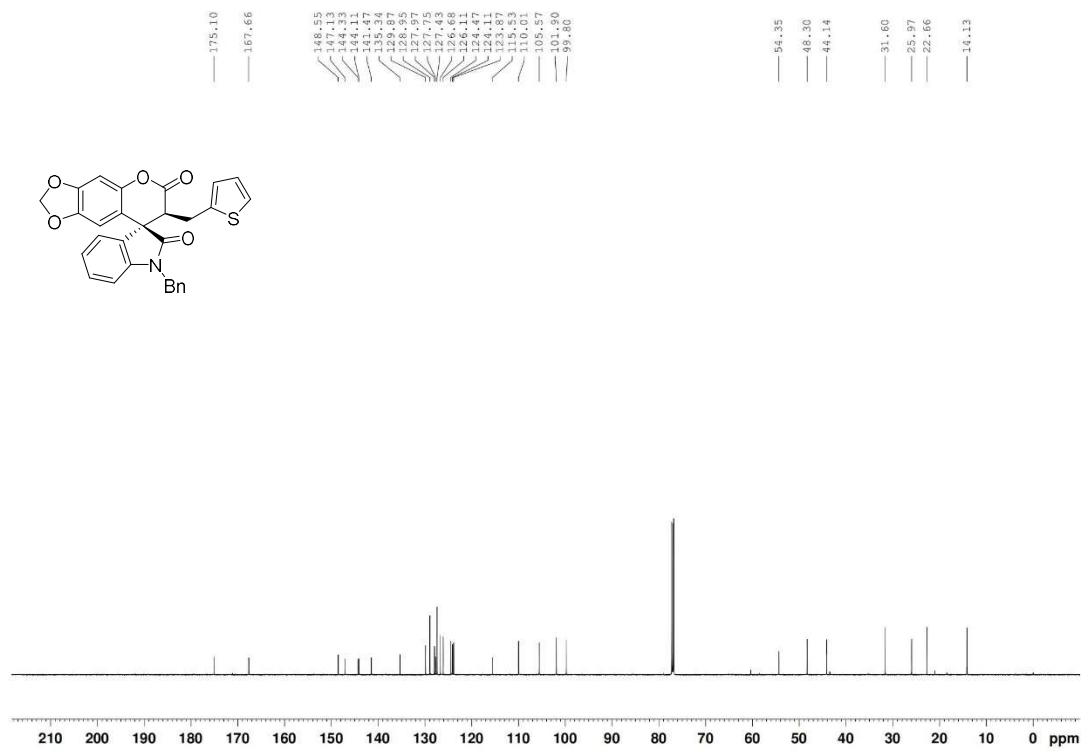

$^1\text{H}$  NMR spectrum of compound **4q** ( $\text{CDCl}_3$ , 400 MHz)

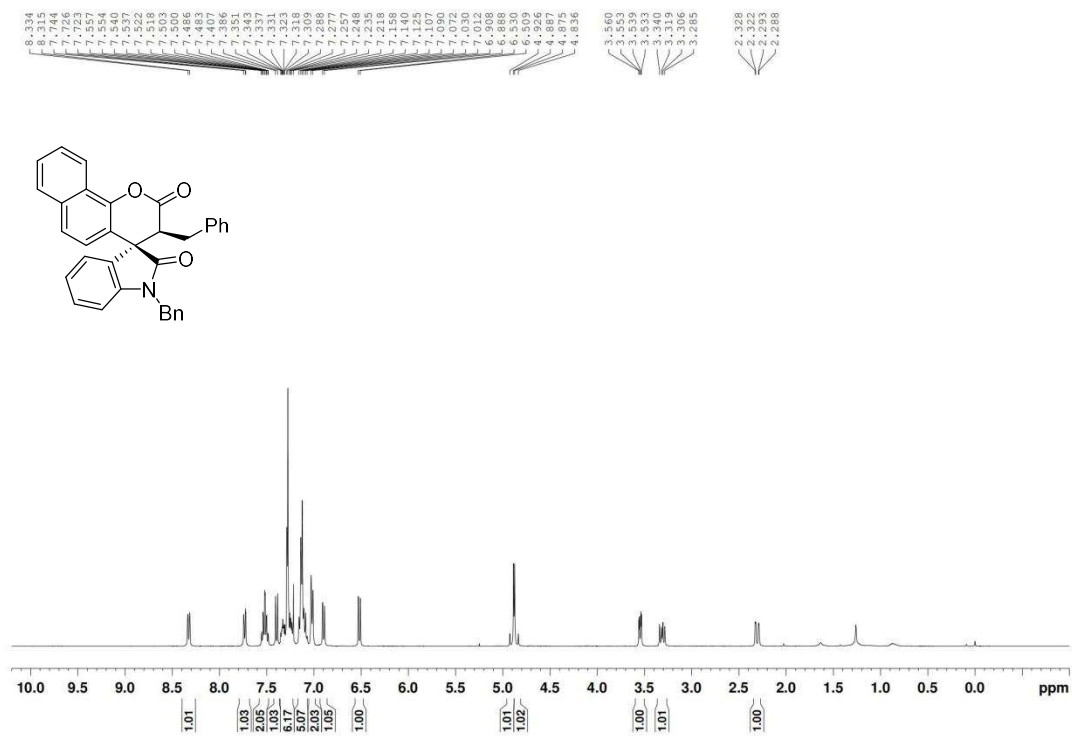

$^{13}\text{C}$  NMR spectrum of compound **4q** ( $\text{CDCl}_3$ , 100 MHz)

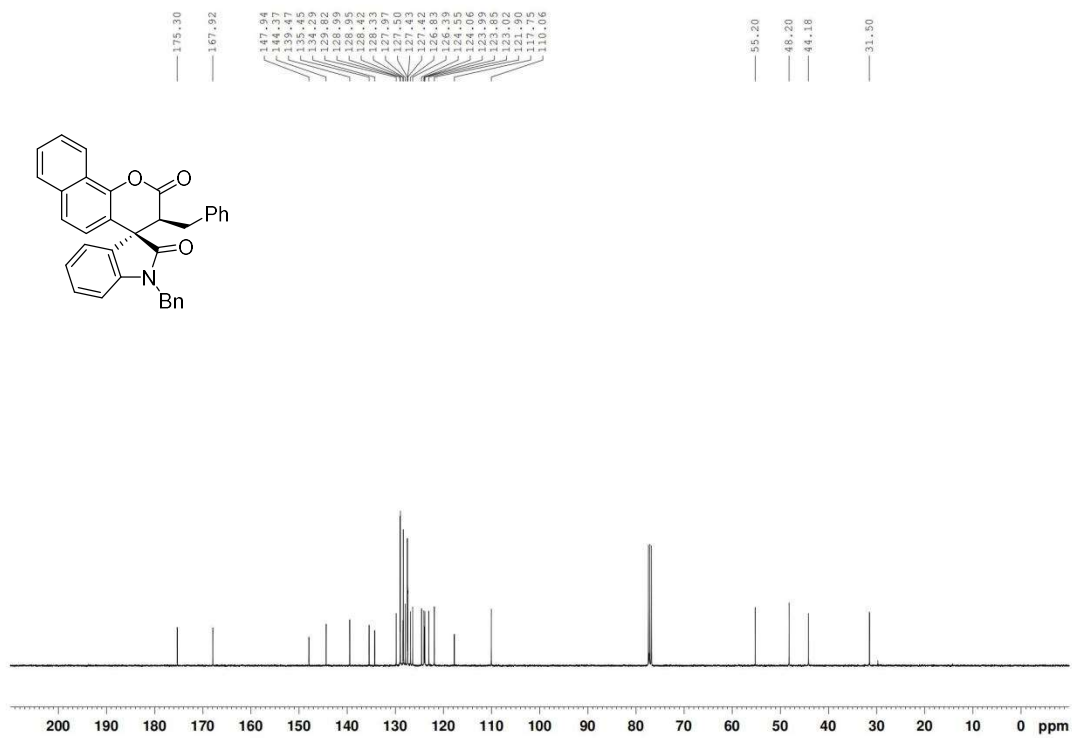

$^1\text{H}$  NMR spectrum of compound **5a** ( $\text{CDCl}_3$ , 400 MHz)

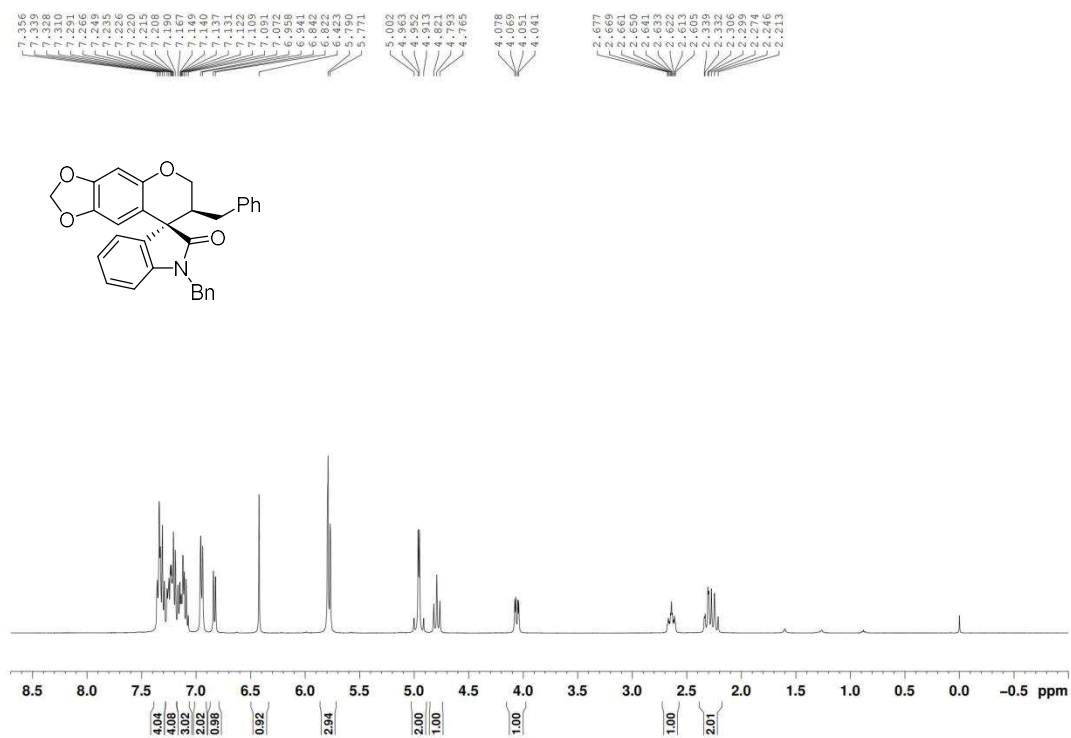

$^{13}\text{C}$  NMR spectrum of compound **5a** ( $\text{CDCl}_3$ , 100 MHz)

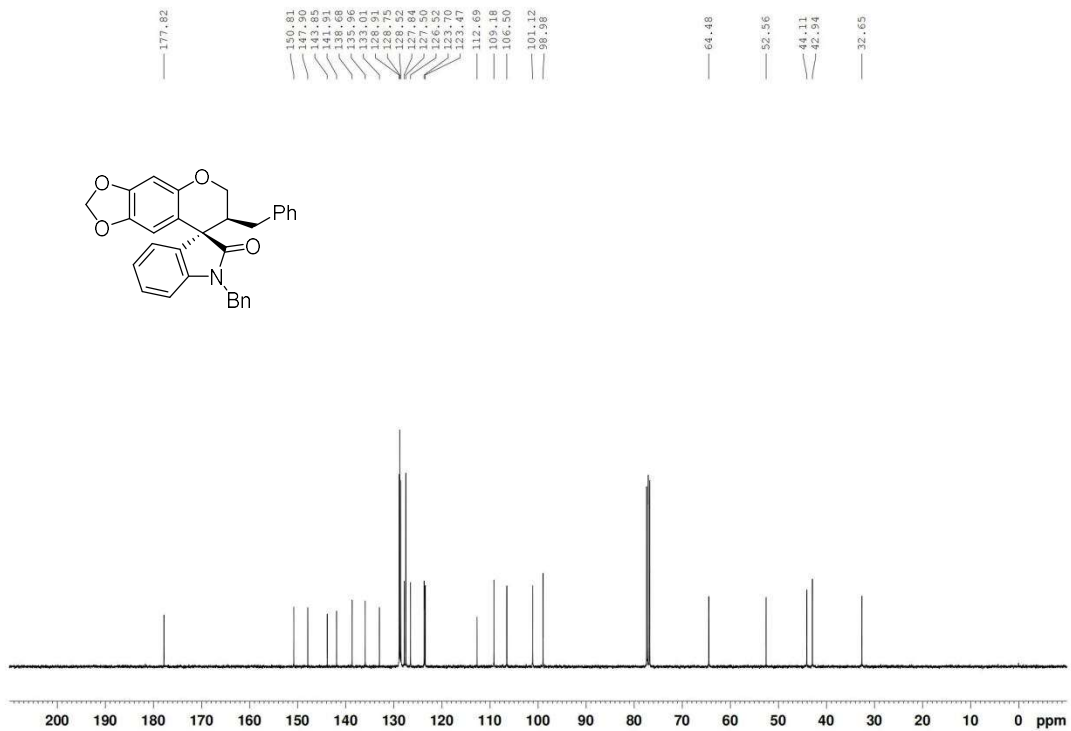



$^1\text{H}$  NMR spectrum of compound **5b** ( $\text{CDCl}_3$ , 400 MHz)

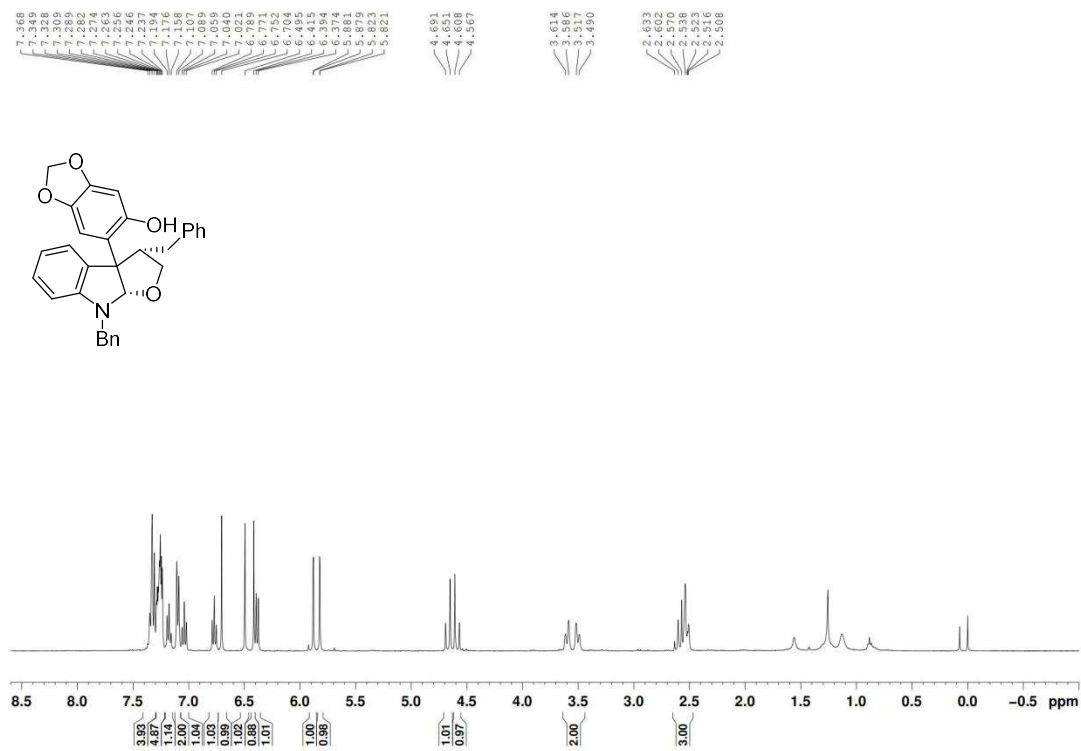

$^{13}\text{C}$  NMR spectrum of compound **5b** ( $\text{CDCl}_3$ , 100 MHz)

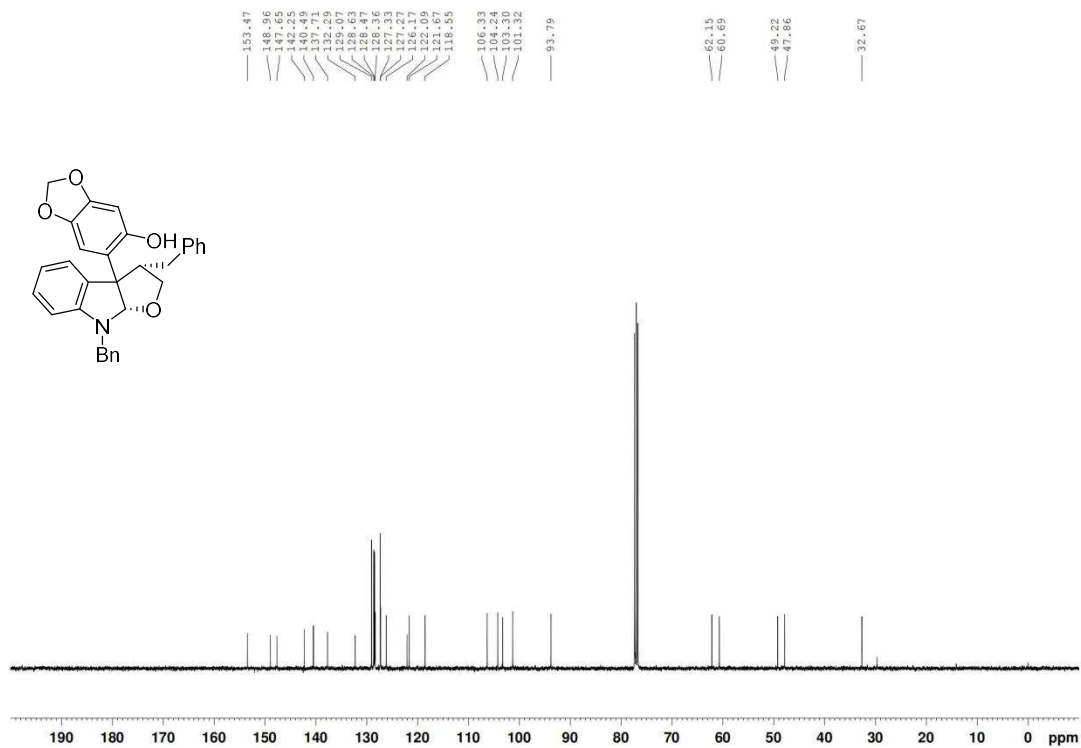

$^1\text{H}$ - $^1\text{H}$  COSY correlation of compound **5b** (400 MHz,  $\text{CDCl}_3$ )

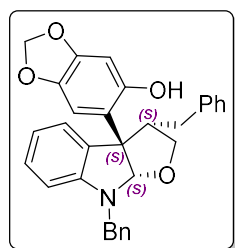

≡

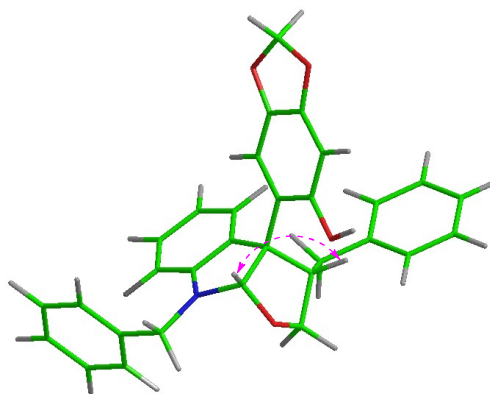

**5b**

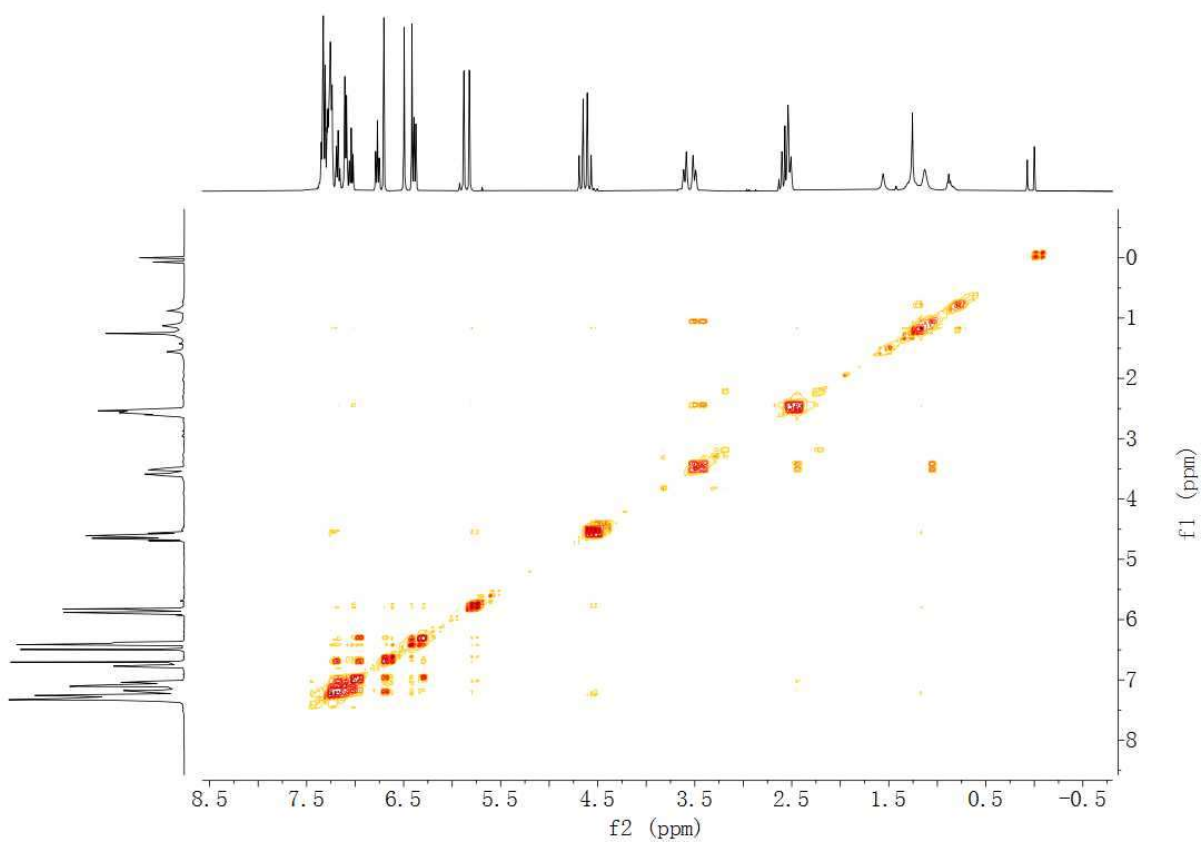

NOESY correlation of compound **5b** (400 MHz, CDCl<sub>3</sub>)

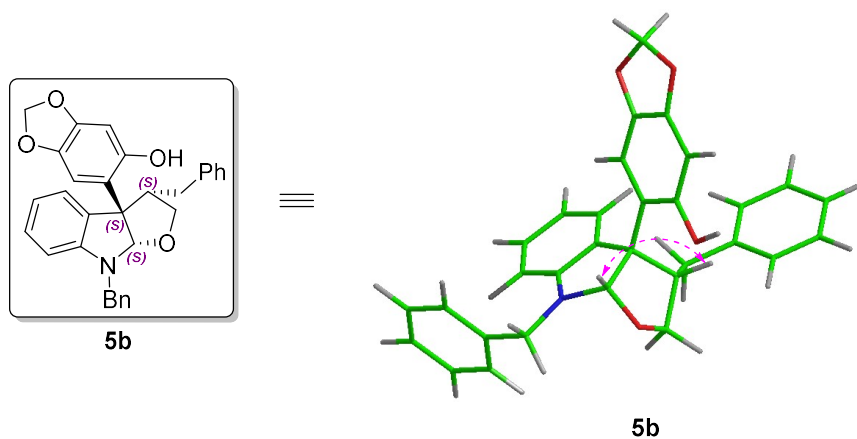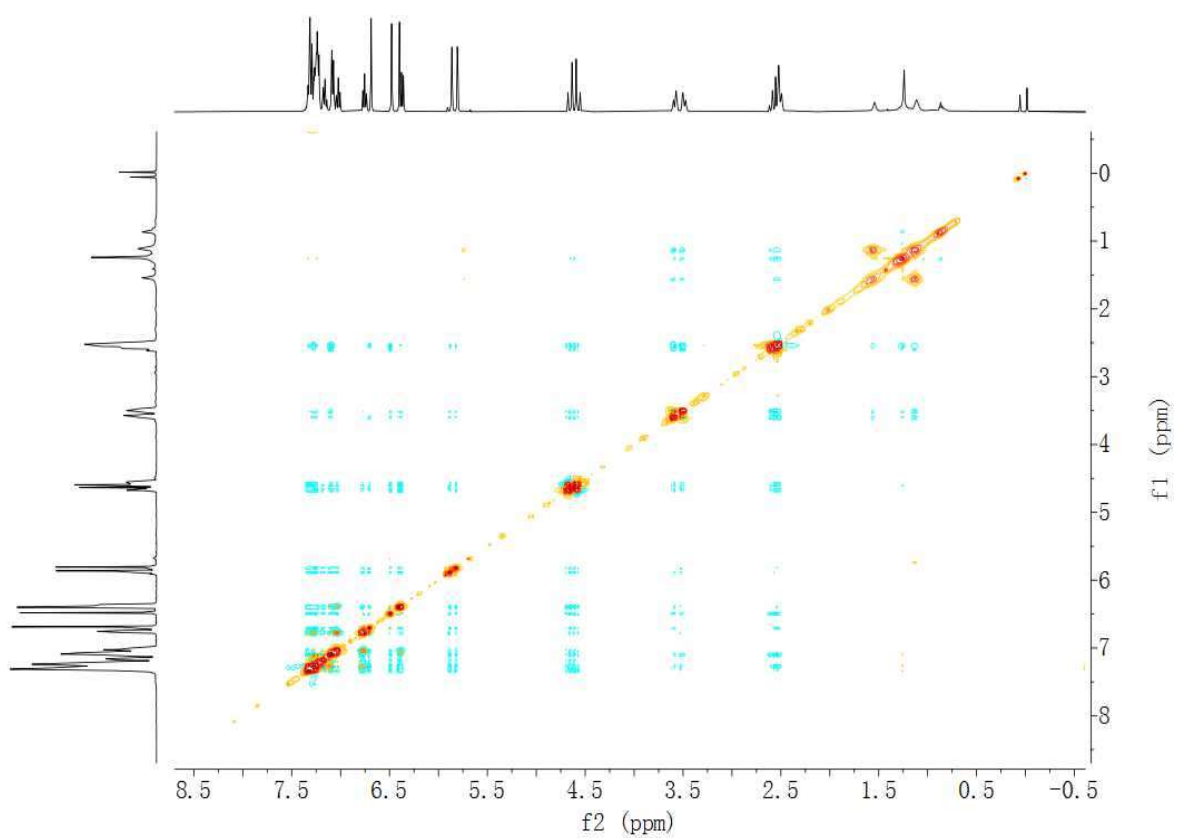

<sup>1</sup>H NMR spectrum of compound **5c** (CDCl<sub>3</sub>, 400 MHz)

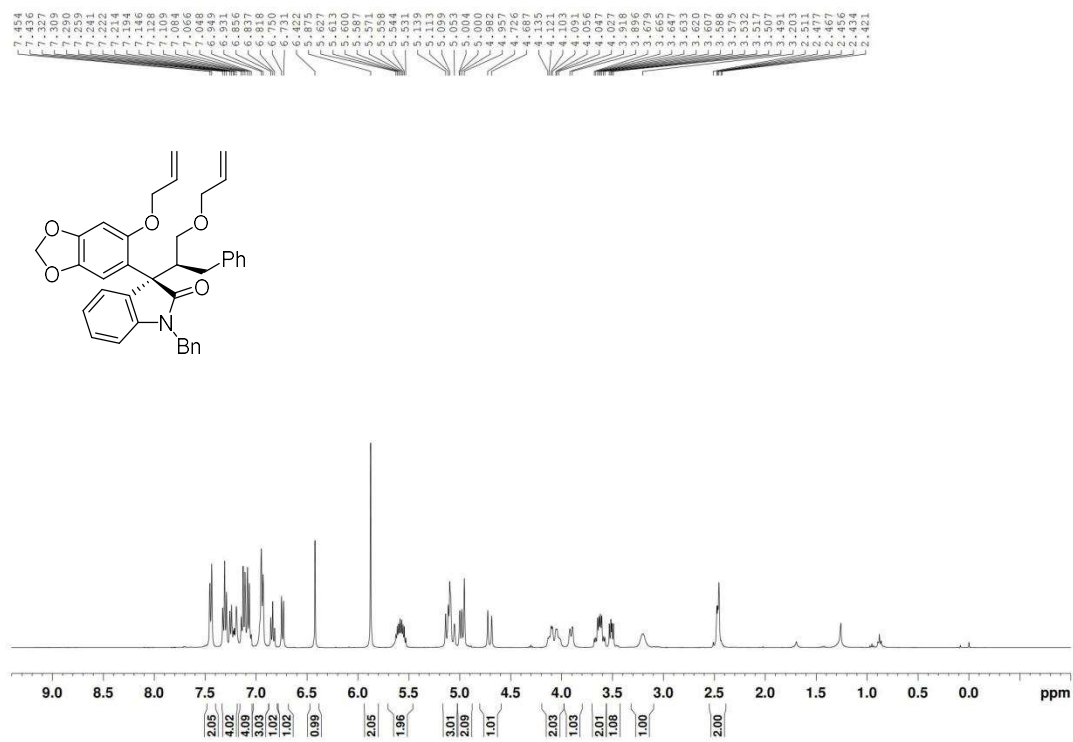

<sup>13</sup>C NMR spectrum of compound **5c** (CDCl<sub>3</sub>, 100 MHz)

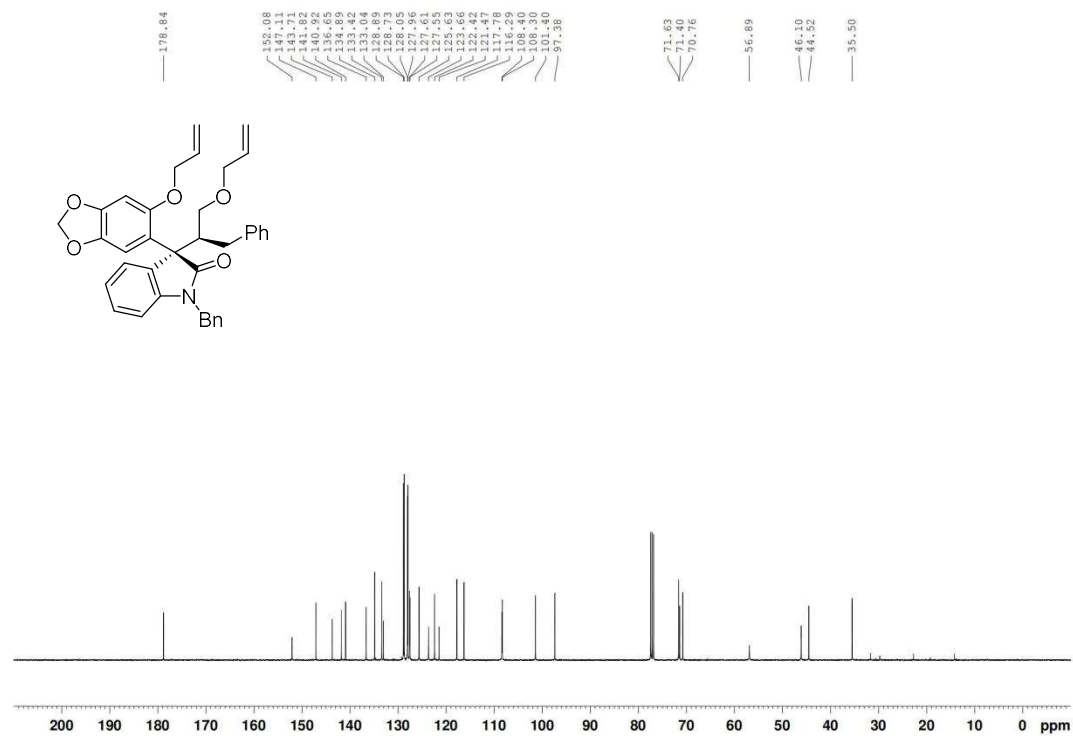

$^1\text{H}$  NMR spectrum of compound **5d** ( $\text{CDCl}_3$ , 400 MHz)

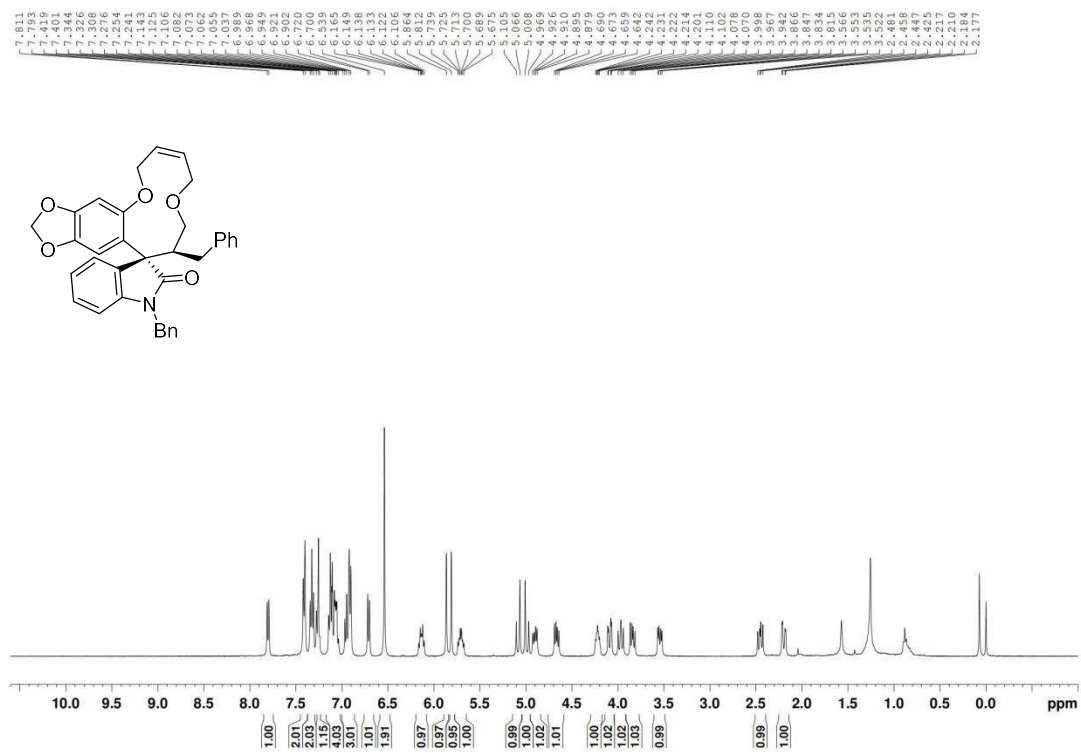

$^{13}\text{C}$  NMR spectrum of compound **5d** ( $\text{CDCl}_3$ , 100 MHz)

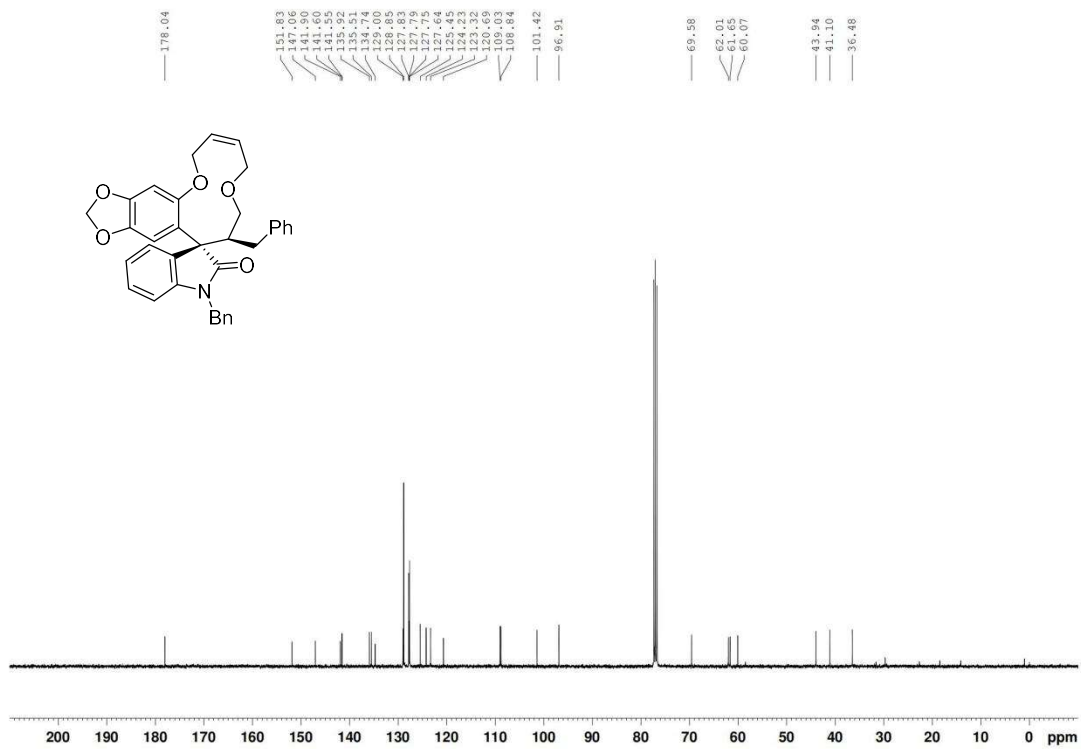

$^1\text{H}$  NMR spectrum of compound **5e** ( $\text{CDCl}_3$ , 400 MHz)

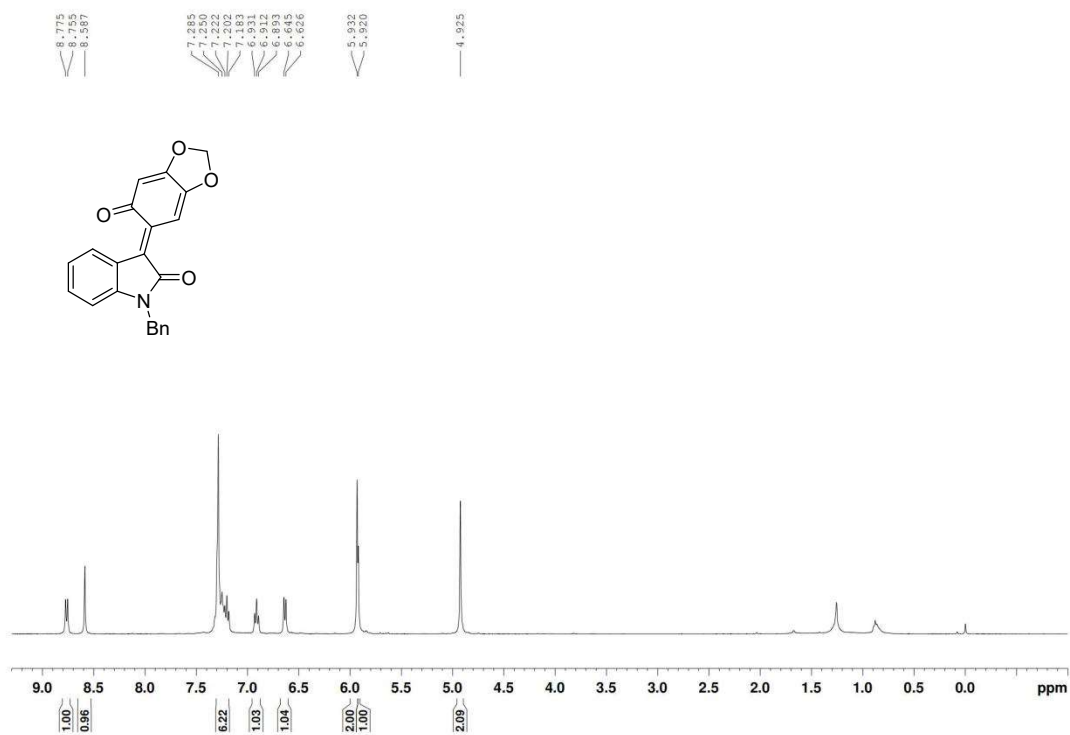

$^{13}\text{C}$  NMR spectrum of compound **5e** ( $\text{CDCl}_3$ , 100 MHz)

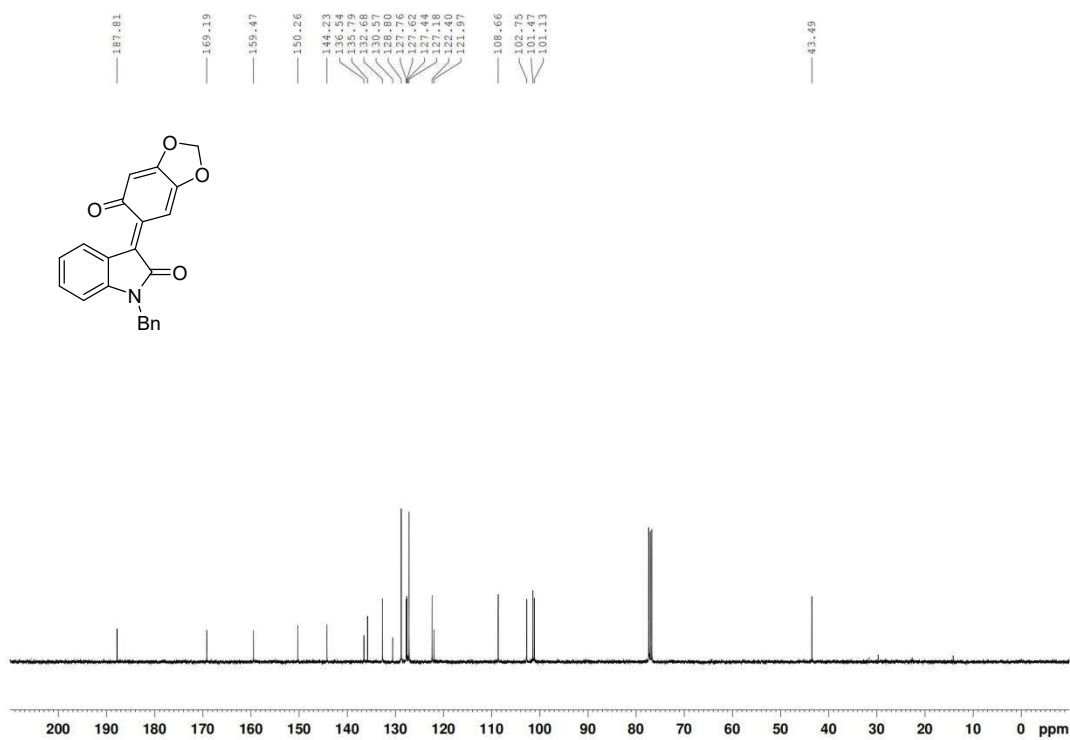

## 11. HPLC Spectra of compounds 3a-3v, 4a-4o, 4q and 5a-5d

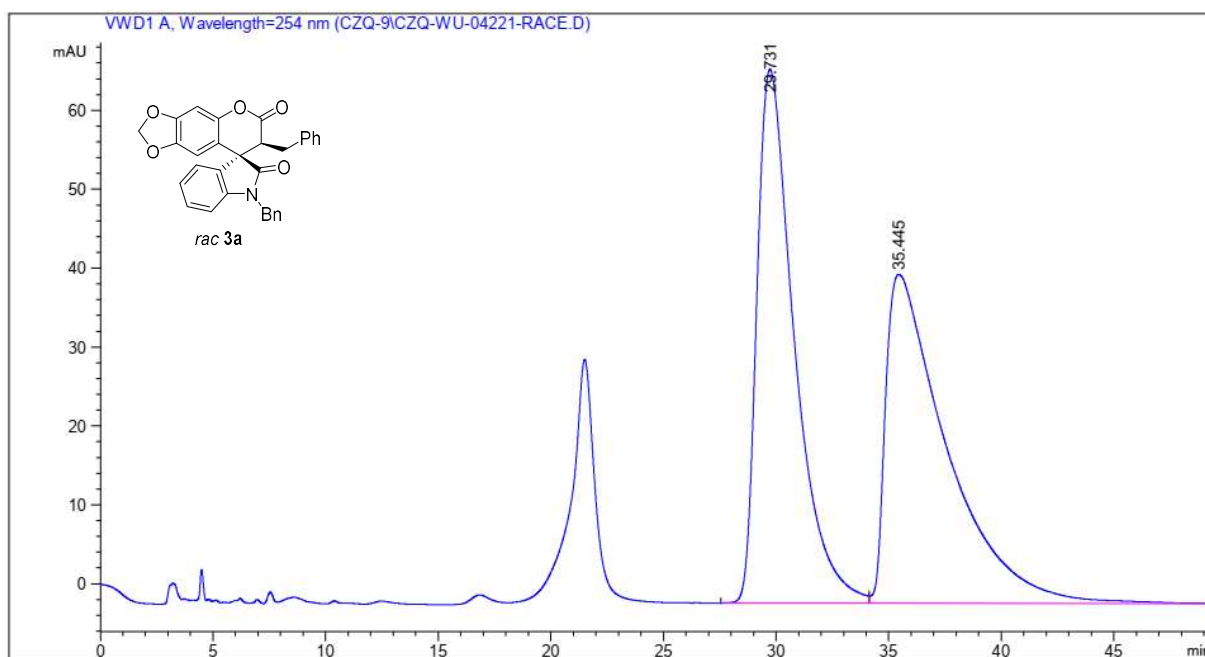

| Peak | Processed channel | Retention time (min) | Peak area (mAU*s) | Peak height (mAU) | Peak area (%) |
|------|-------------------|----------------------|-------------------|-------------------|---------------|
| 1    | PDA 254.0 nm      | 30.636               | 7792.57031        | 67.68628          | 49.8320       |
| 2    | PDA 254.0 nm      | 36.529               | 7845.10889        | 41.66190          | 50.1680       |

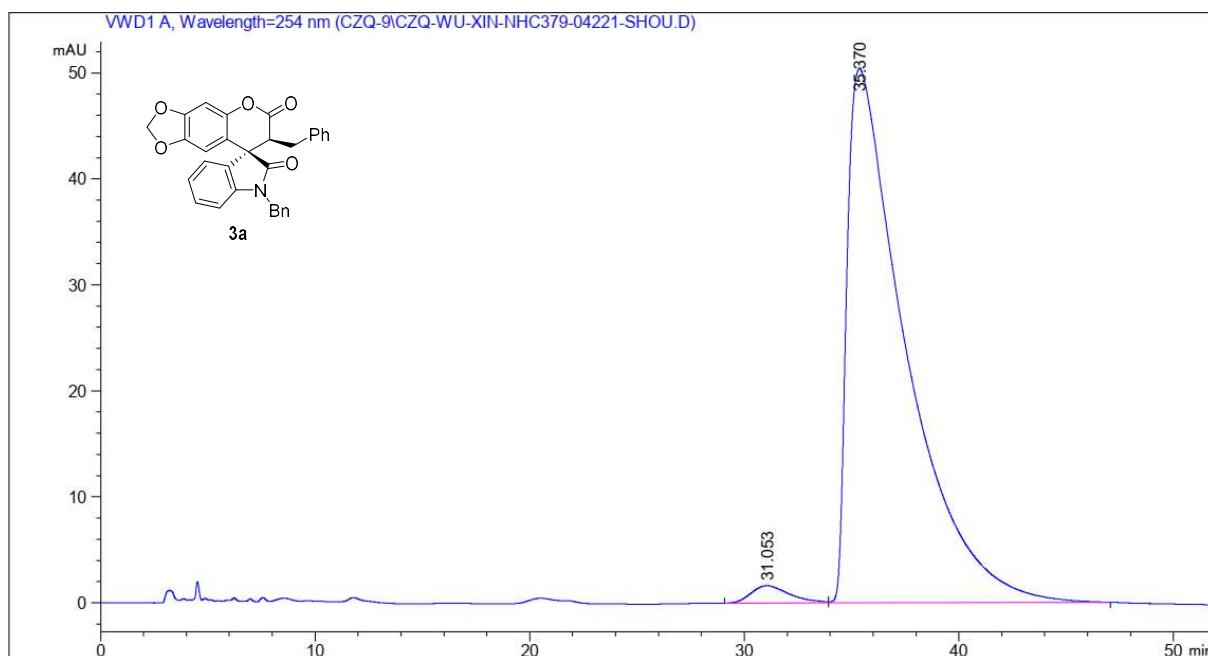

| Peak | Processed channel | Retention time (min) | Peak area (mAU*s) | Peak height (mAU) | Peak area (%) |
|------|-------------------|----------------------|-------------------|-------------------|---------------|
| 1    | PDA 254.0 nm      | 31.053               | 205.12457         | 1.64141           | 2.0993        |
| 2    | PDA 254.0 nm      | 35.370               | 9565.96387        | 50.45354          | 97.9007       |

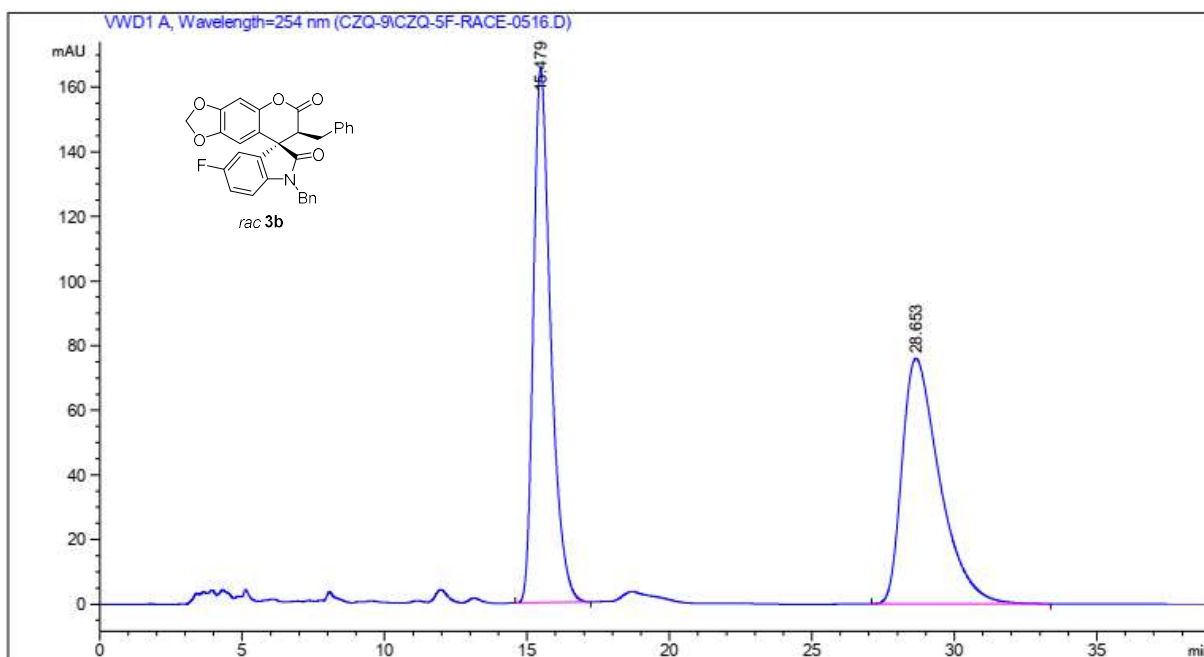

| Peak | Processed channel | Retention time (min) | Peak area (mAU*s) | Peak height (mAU) | Peak area (%) |
|------|-------------------|----------------------|-------------------|-------------------|---------------|
| 1    | PDA 254.0 nm      | 15.479               | 6988.32568        | 165.35936         | 50.0642       |
| 2    | PDA 254.0 nm      | 28.653               | 6970.39893        | 75.94314          | 49.9358       |

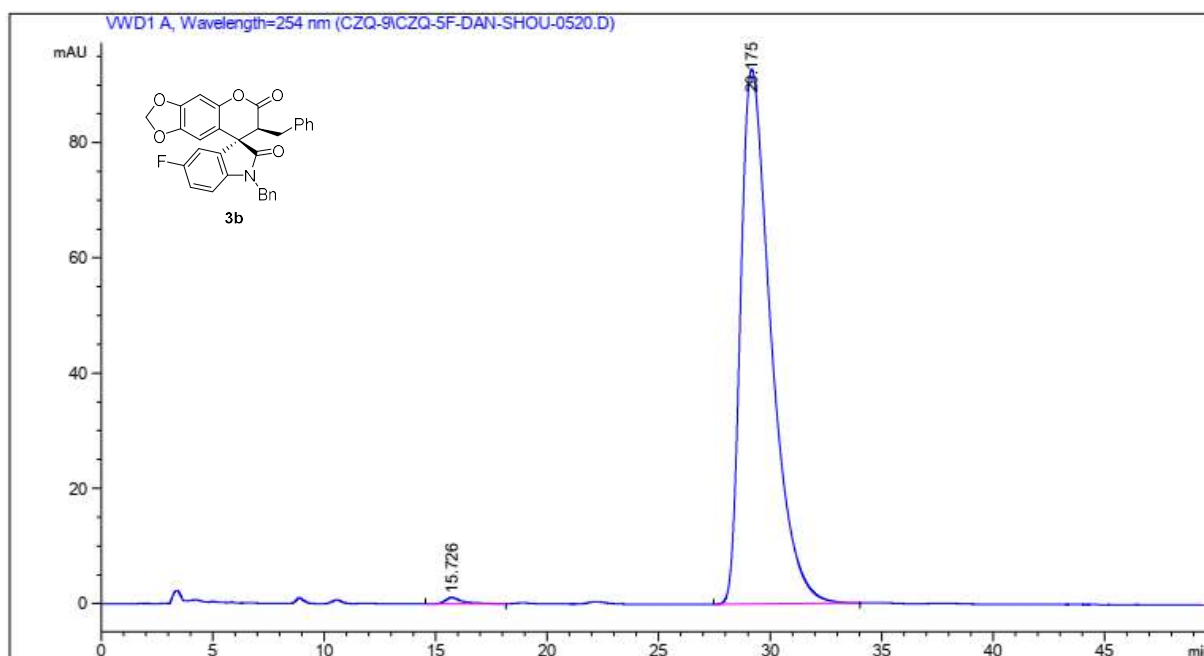

| Peak | Processed channel | Retention time (min) | Peak area (mAU*s) | Peak height (mAU) | Peak area (%) |
|------|-------------------|----------------------|-------------------|-------------------|---------------|
| 1    | PDA 254.0 nm      | 15.726               | 60.29297          | 1.11178           | 0.6829        |
| 2    | PDA 254.0 nm      | 29.175               | 8769.07227        | 92.83614          | 99.3171       |



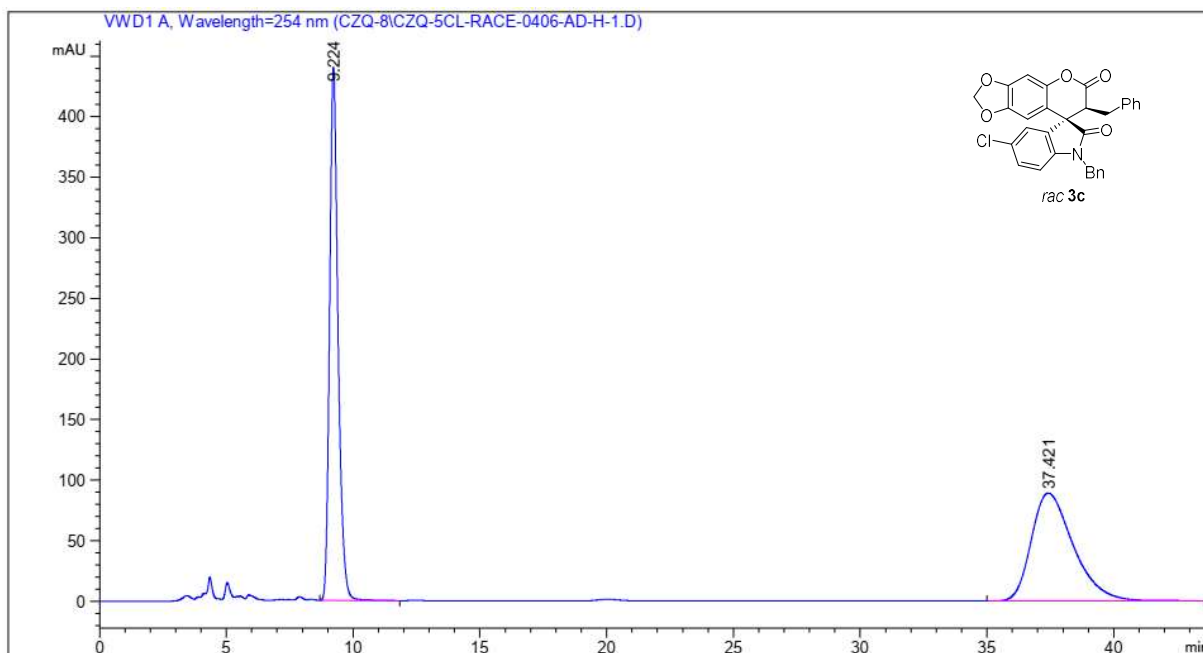

| Peak | Processed channel | Retention time (min) | Peak area (mAU*s) | Peak height (mAU) | Peak area (%) |
|------|-------------------|----------------------|-------------------|-------------------|---------------|
| 1    | PDA 254.0 nm      | 9.224                | 1.02387e4         | 440.33499         | 49.9778       |
| 2    | PDA 254.0 nm      | 37.421               | 1.02478e4         | 89.05914          | 50.0222       |

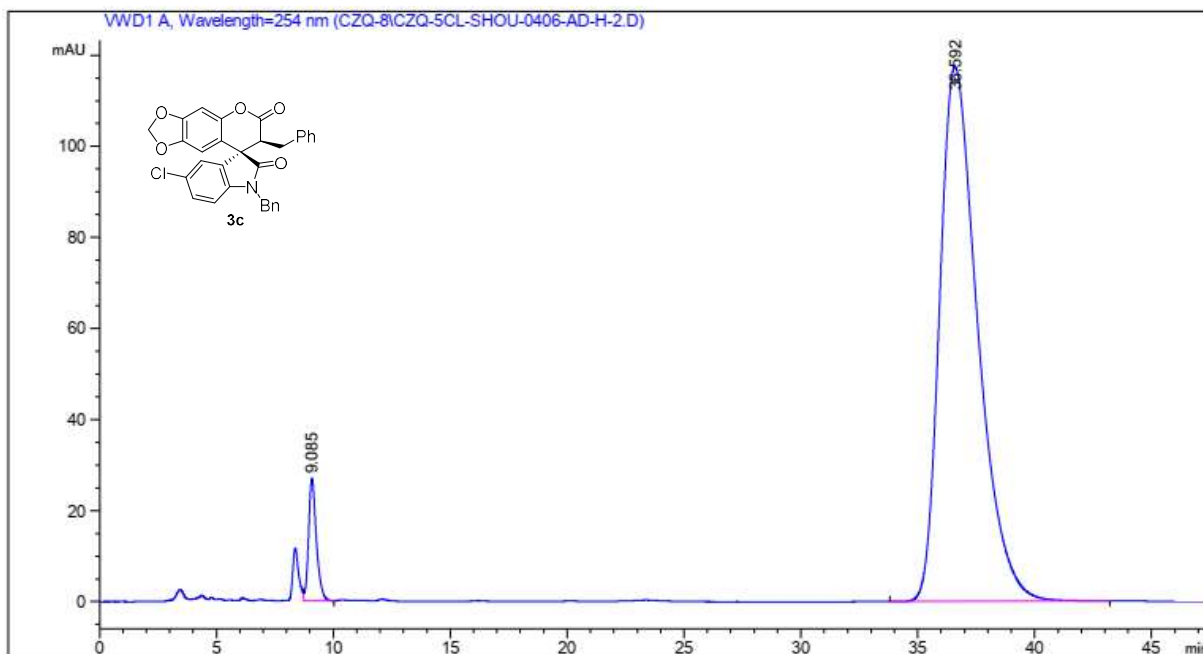

| Peak | Processed channel | Retention time (min) | Peak area (mAU*s) | Peak height (mAU) | Peak area (%) |
|------|-------------------|----------------------|-------------------|-------------------|---------------|
| 1    | PDA 254.0 nm      | 9.085                | 620.10455         | 26.86867          | 4.4715        |
| 2    | PDA 254.0 nm      | 36.592               | 1.32478e4         | 117.42579         | 95.5285       |

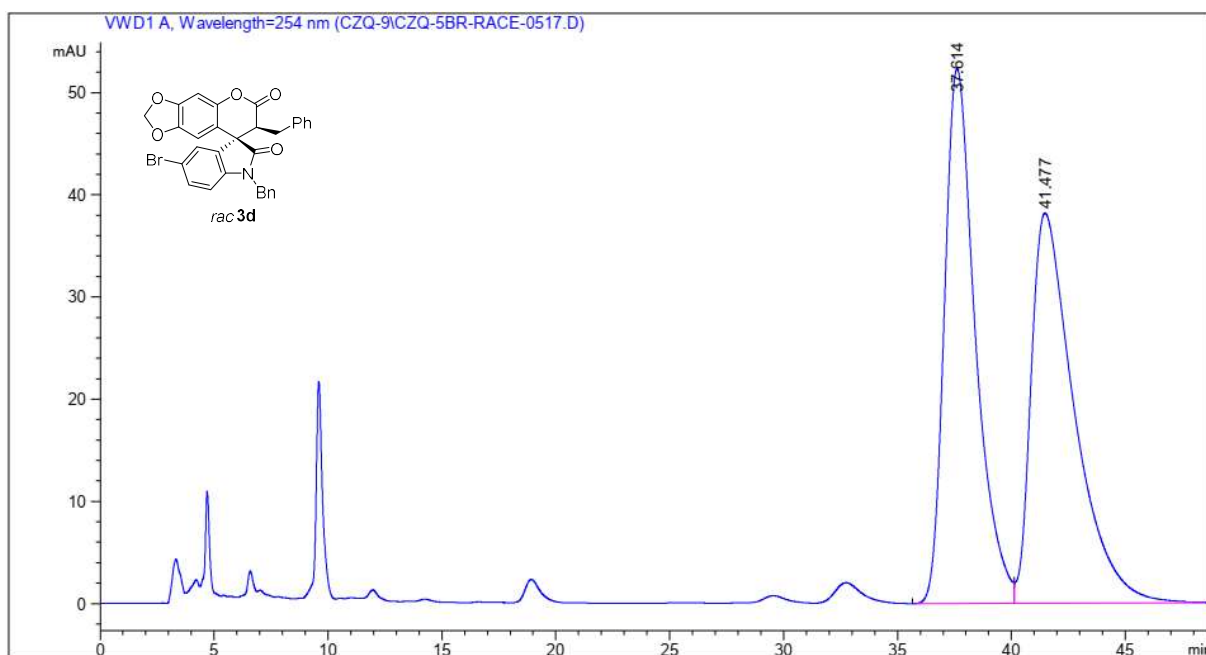

| Peak | Processed channel | Retention time (min) | Peak area (mAU*s) | Peak height (mAU) | Peak area (%) |
|------|-------------------|----------------------|-------------------|-------------------|---------------|
| 1    | PDA 254.0 nm      | 37.614               | 4952.22510        | 52.33844          | 49.5999       |
| 2    | PDA 254.0 nm      | 41.477               | 5032.10986        | 38.20591          | 50.4001       |

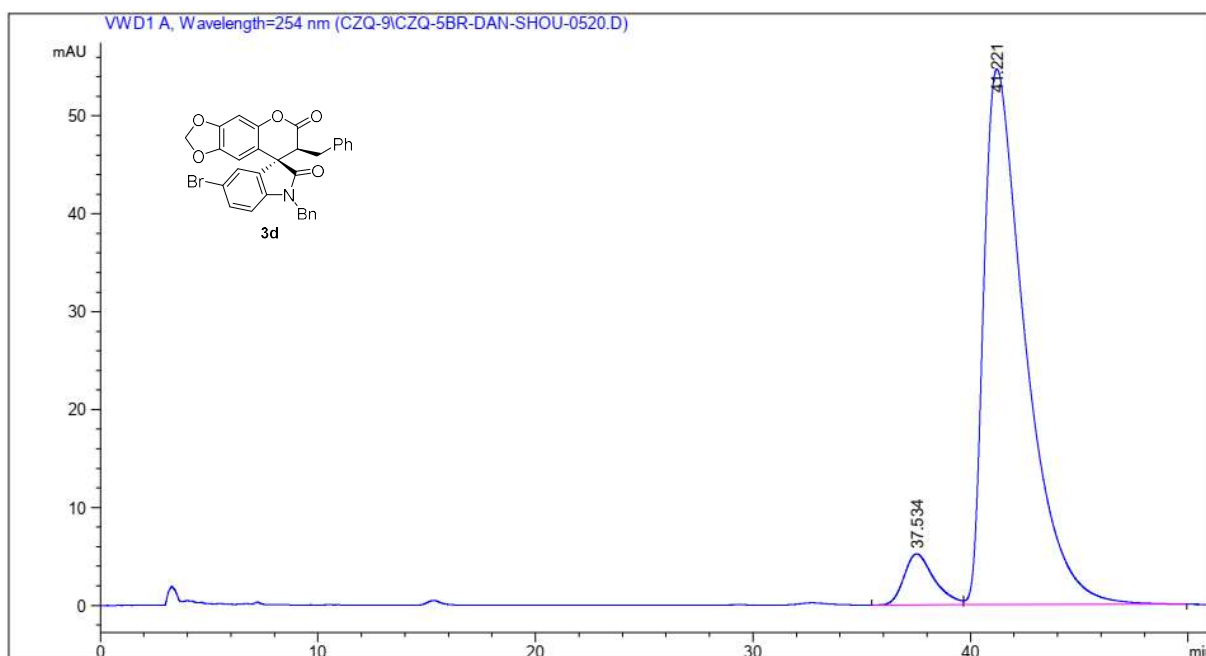

| Peak | Processed channel | Retention time (min) | Peak area (mAU*s) | Peak height (mAU) | Peak area (%) |
|------|-------------------|----------------------|-------------------|-------------------|---------------|
| 1    | PDA 254.0 nm      | 37.534               | 502.83112         | 5.22041           | 6.4854        |
| 2    | PDA 254.0 nm      | 41.221               | 7250.39551        | 54.71442          | 93.5146       |

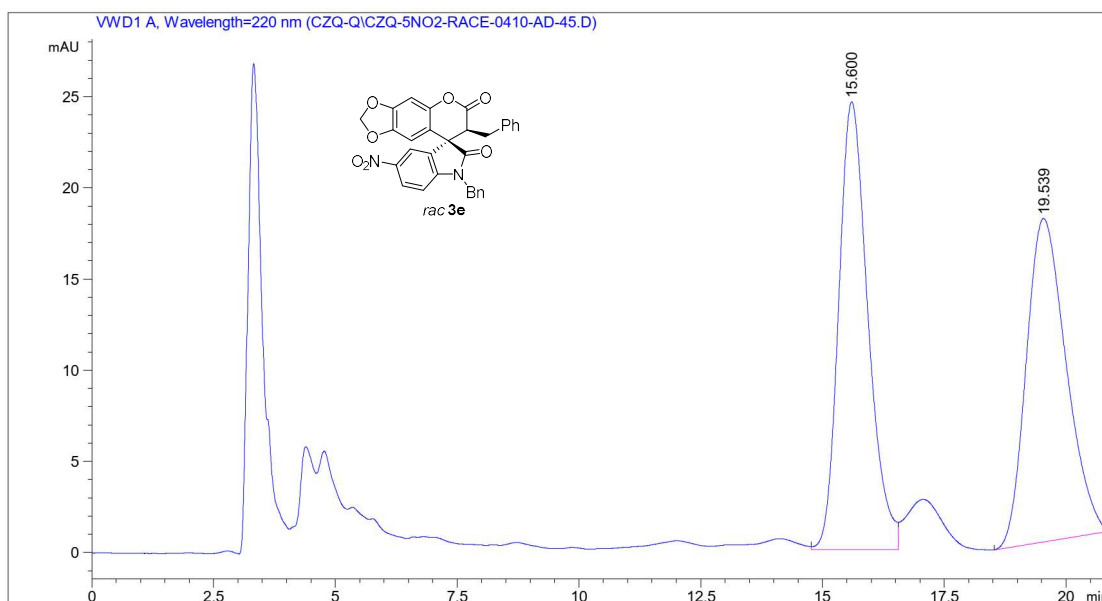

| Peak | Processed channel | Retention time (min) | Peak area (mAU*s) | Peak height (mAU) | Peak area (%) |
|------|-------------------|----------------------|-------------------|-------------------|---------------|
| 1    | PDA 220.0 nm      | 15.600               | 1024.99280        | 24.55524          | 50.4935       |
| 2    | PDA 220.0 nm      | 19.539               | 1004.95544        | 17.73695          | 49.5065       |

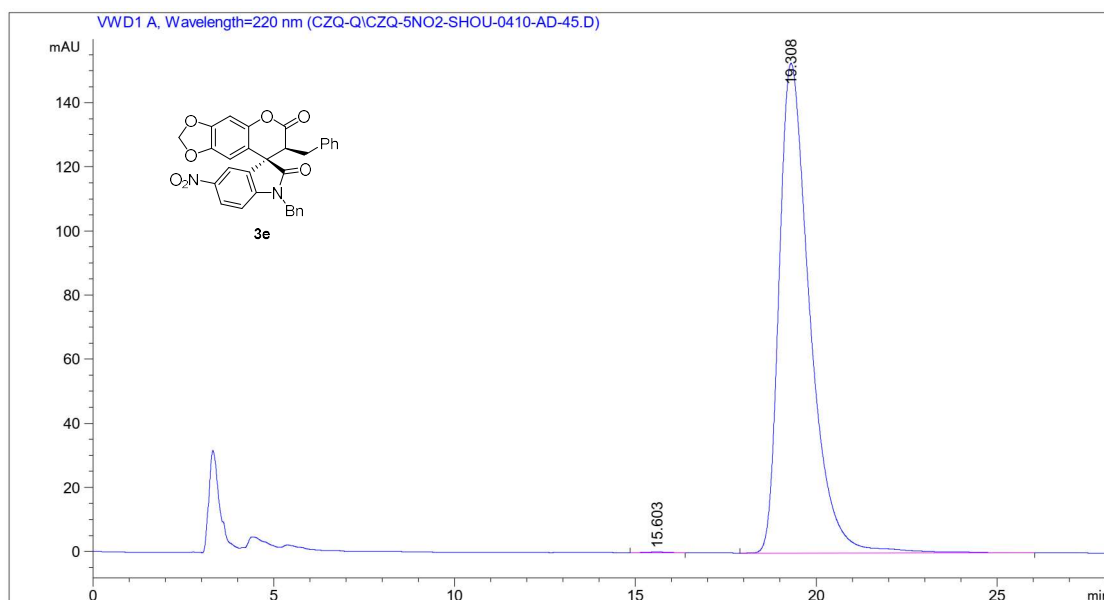

| Peak | Processed channel | Retention time (min) | Peak area (mAU*s) | Peak height (mAU) | Peak area (%) |
|------|-------------------|----------------------|-------------------|-------------------|---------------|
| 1    | PDA 220.0 nm      | 15.603               | 8.94669           | 2.26344e-1        | 0.0994        |
| 2    | PDA 220.0 nm      | 19.308               | 8993.23828        | 152.75951         | 99.9006       |

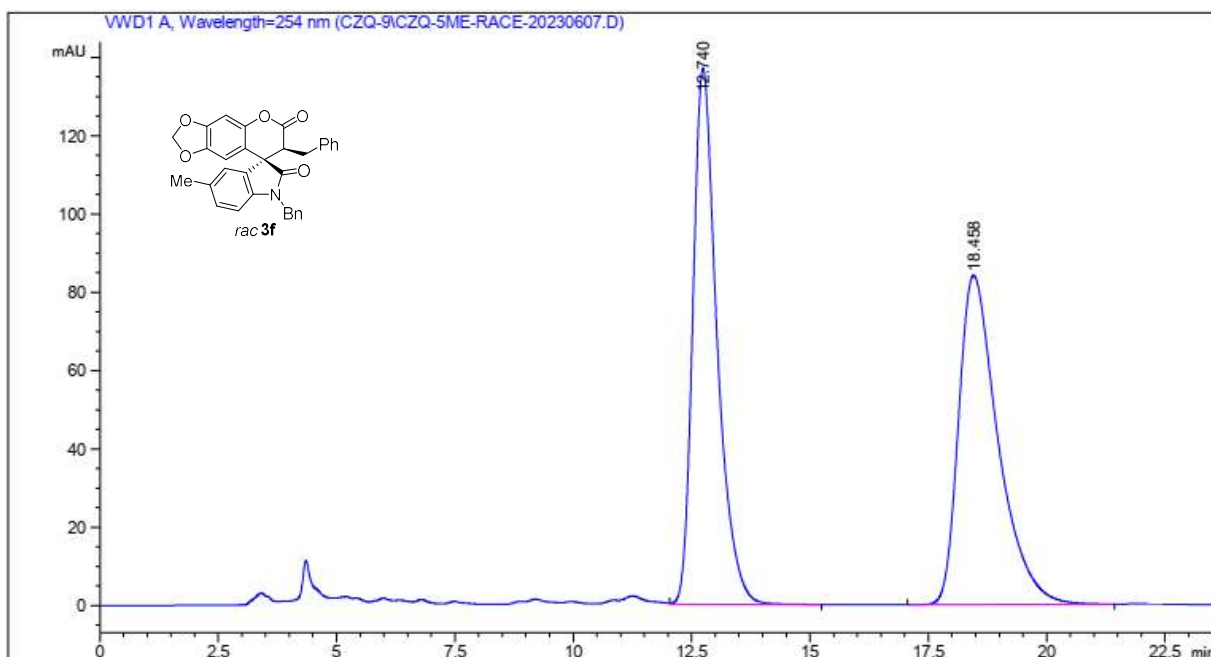

| Peak | Processed channel | Retention time (min) | Peak area (mAU*s) | Peak height (mAU) | Peak area (%) |
|------|-------------------|----------------------|-------------------|-------------------|---------------|
| 1    | PDA 254.0 nm      | 12.740               | 4838.11084        | 136.78374         | 49.8634       |
| 2    | PDA 254.0 nm      | 18.458               | 4864.61377        | 84.05011          | 50.1366       |

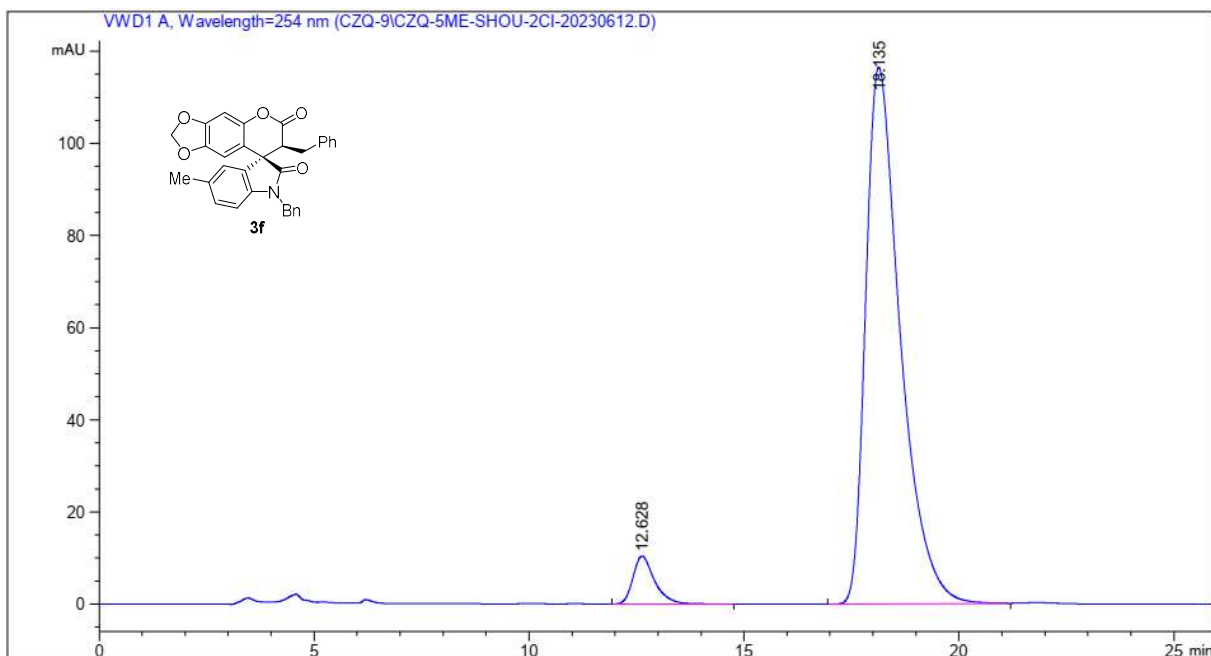

| Peak | Processed channel | Retention time (min) | Peak area (mAU*s) | Peak height (mAU) | Peak area (%) |
|------|-------------------|----------------------|-------------------|-------------------|---------------|
| 1    | PDA 254.0 nm      | 12.628               | 362.06055         | 390.09644         | 5.2657        |
| 2    | PDA 254.0 nm      | 18.135               | 6513.83008        | 116.52373         | 94.7343       |

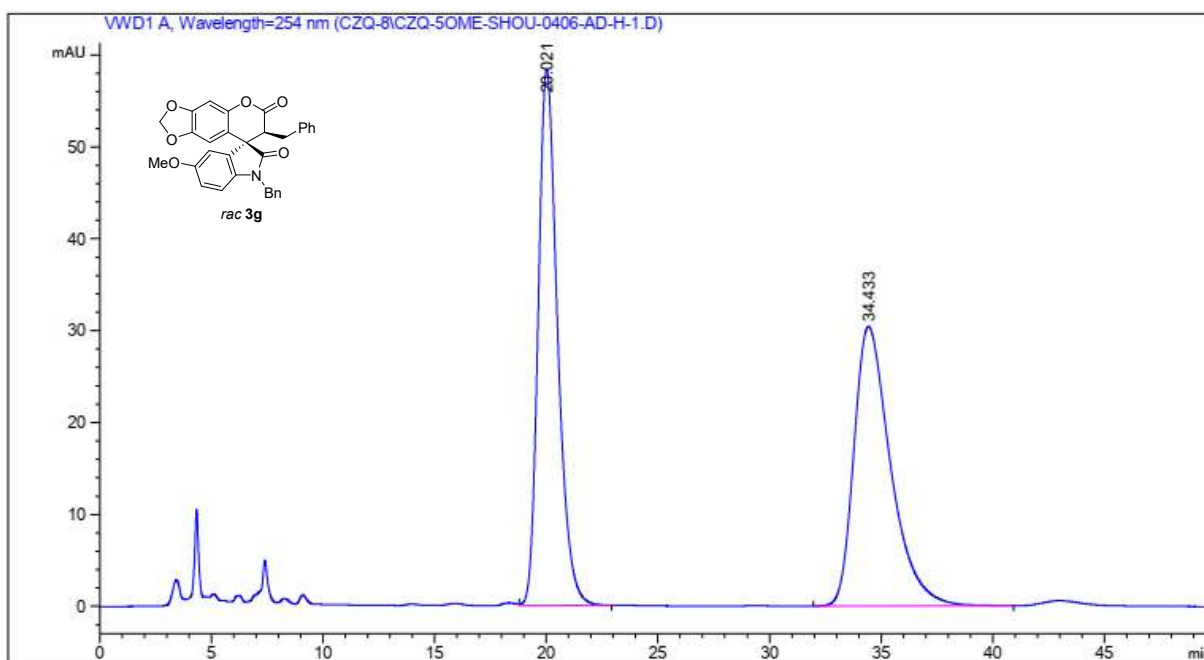

| Peak | Processed channel | Retention time (min) | Peak area (mAU*s) | Peak height (mAU) | Peak area (%) |
|------|-------------------|----------------------|-------------------|-------------------|---------------|
| 1    | PDA 254.0 nm      | 20.021               | 3500.96655        | 58.34473          | 50.1880       |
| 2    | PDA 254.0 nm      | 34.433               | 3474.74463        | 30.40070          | 49.8120       |

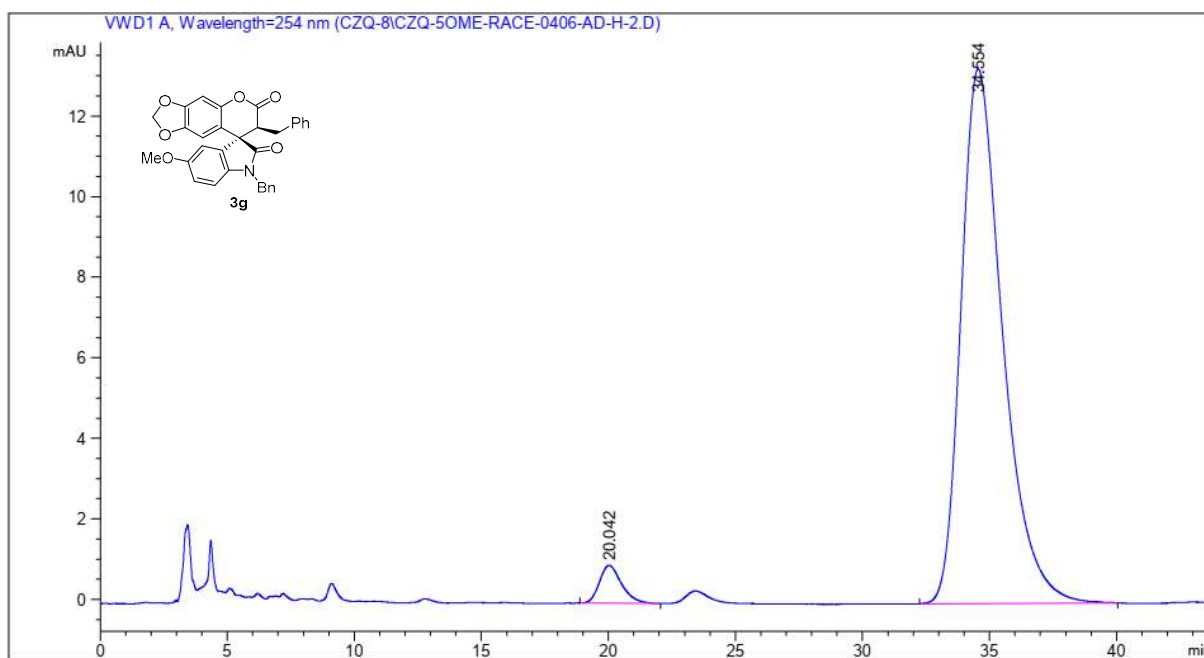

| Peak | Processed channel | Retention time (min) | Peak area (mAU*s) | Peak height (mAU) | Peak area (%) |
|------|-------------------|----------------------|-------------------|-------------------|---------------|
| 1    | PDA 254.0 nm      | 20.042               | 57.30474          | 9.40746e-1        | 3.6587        |
| 2    | PDA 254.0 nm      | 34.554               | 1508.95447        | 13.27624          | 96.3413       |

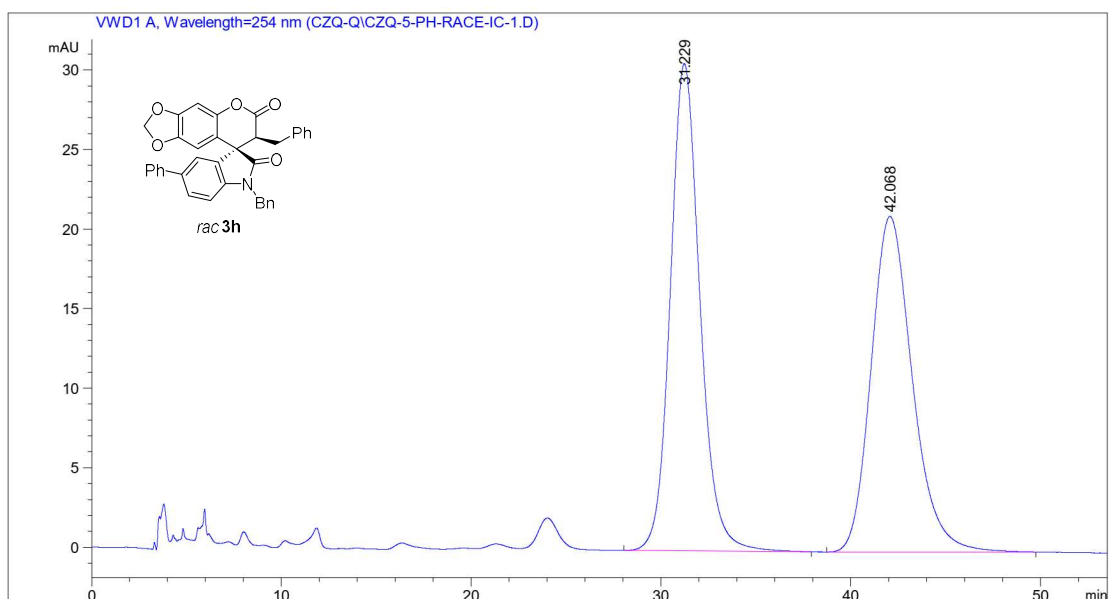

| Peak | Processed channel | Retention time (min) | Peak area (mAU*s) | Peak height (mAU) | Peak area (%) |
|------|-------------------|----------------------|-------------------|-------------------|---------------|
| 1    | PDA 254.0 nm      | 31.229               | 3322.78296        | 30.62305          | 51.0184       |
| 2    | PDA 254.0 nm      | 42.068               | 3190.12671        | 21.09669          | 48.9816       |

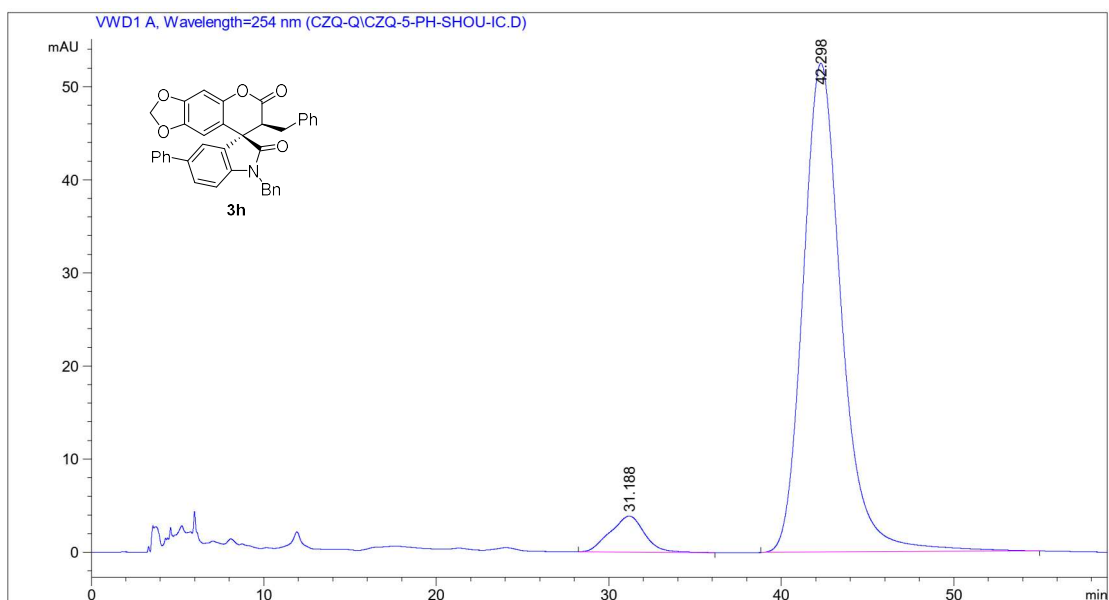

| Peak | Processed channel | Retention time (min) | Peak area (mAU*s) | Peak height (mAU) | Peak area (%) |
|------|-------------------|----------------------|-------------------|-------------------|---------------|
| 1    | PDA 254.0 nm      | 31.188               | 530.09558         | 3.86420           | 6.1103        |
| 2    | PDA 254.0 nm      | 42.298               | 8145.36963        | 52.49854          | 93.8897       |

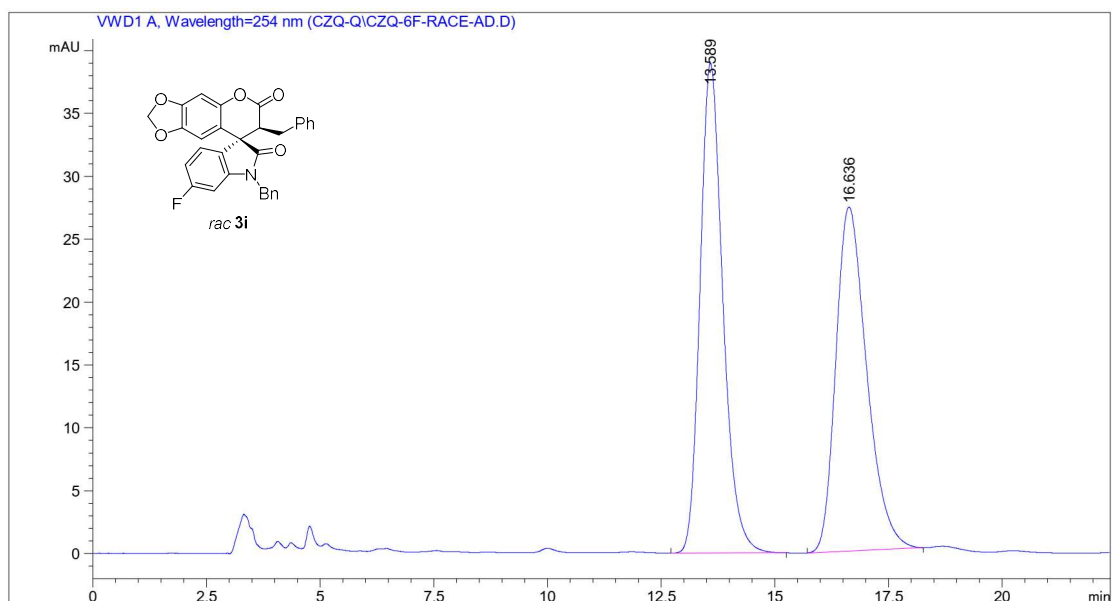

| Peak | Processed channel | Retention time (min) | Peak area (mAU*s) | Peak height (mAU) | Peak area (%) |
|------|-------------------|----------------------|-------------------|-------------------|---------------|
| 1    | PDA 254.0 nm      | 13.589               | 1358.33569        | 38.94492          | 51.2685       |
| 2    | PDA 254.0 nm      | 16.636               | 1291.11816        | 27.36017          | 48.7315       |

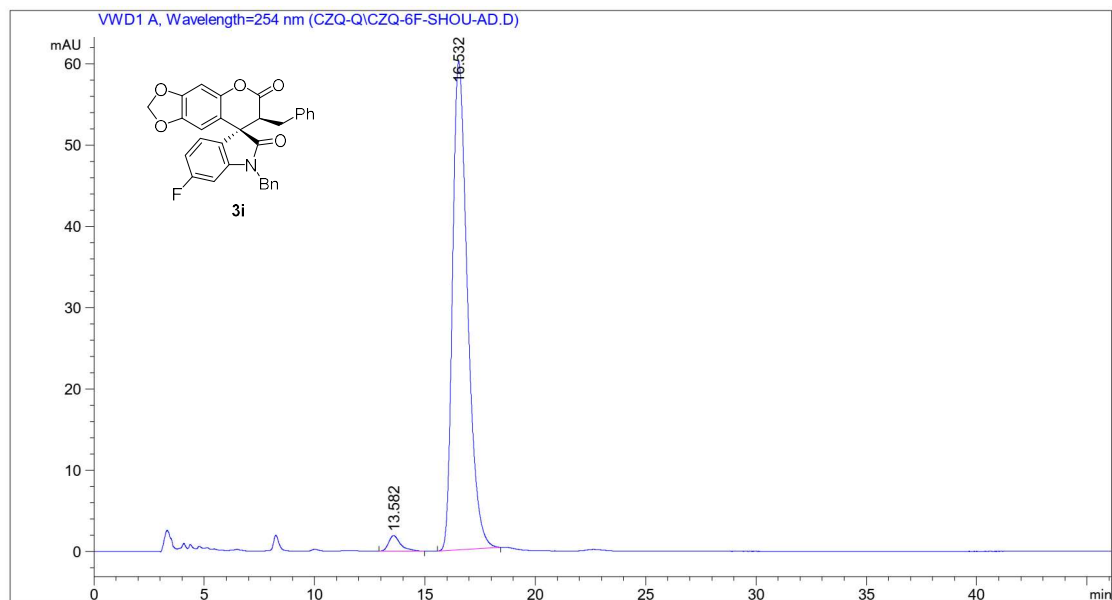

| Peak | Processed channel | Retention time (min) | Peak area (mAU*s) | Peak height (mAU) | Peak area (%) |
|------|-------------------|----------------------|-------------------|-------------------|---------------|
| 1    | PDA 254.0 nm      | 13.582               | 71.86649          | 1.91658           | 2.4778        |
| 2    | PDA 254.0 nm      | 16.532               | 2828.49951        | 60.10563          | 97.5222       |

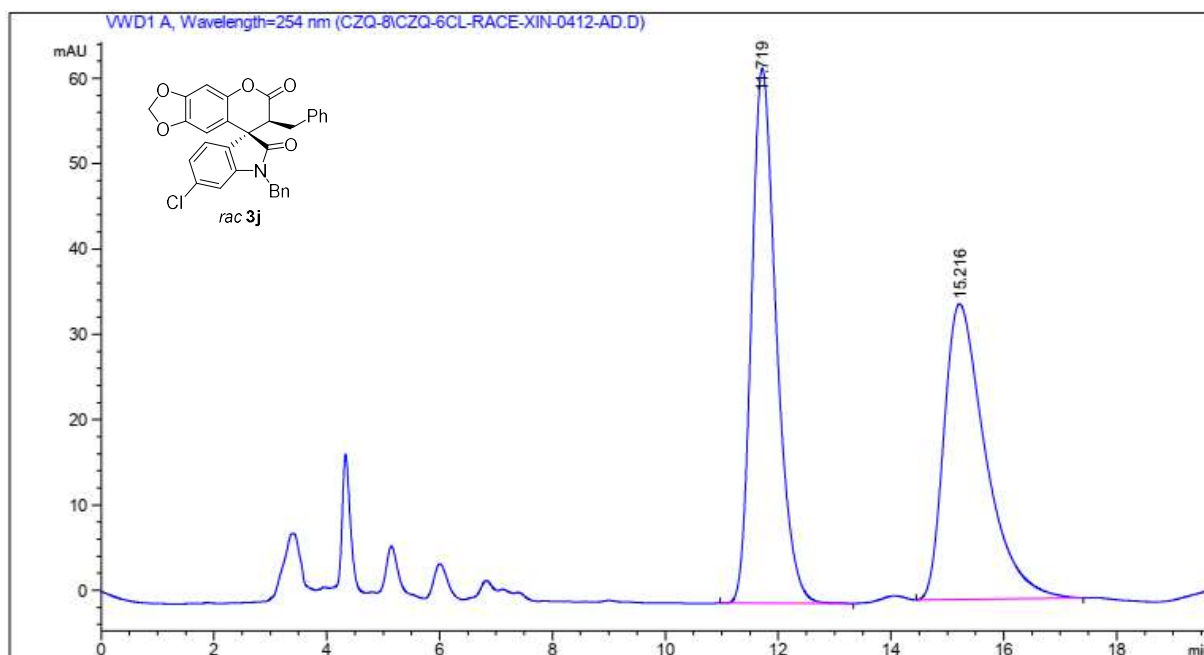

| Peak | Processed channel | Retention time (min) | Peak area (mAU*s) | Peak height (mAU) | Peak area (%) |
|------|-------------------|----------------------|-------------------|-------------------|---------------|
| 1    | PDA 254.0 nm      | 11.719               | 1917.44775        | 62.67554          | 52.1192       |
| 2    | PDA 254.0 nm      | 15.216               | 1761.52087        | 34.64141          | 47.8808       |

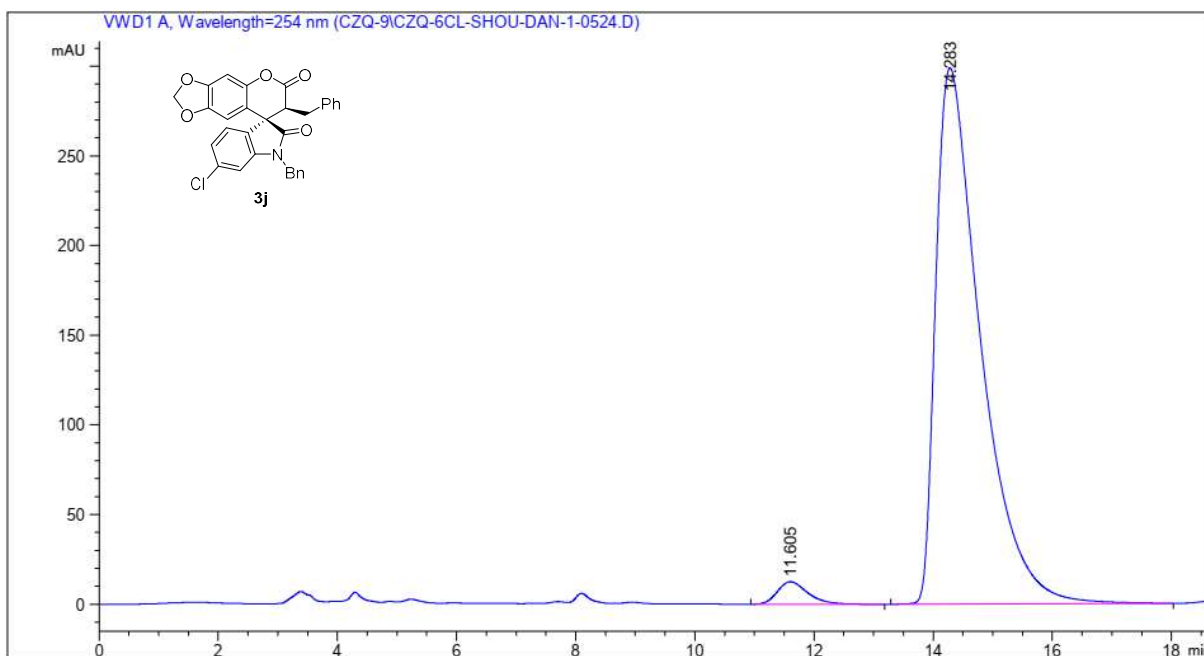

| Peak | Processed channel | Retention time (min) | Peak area (mAU*s) | Peak height (mAU) | Peak area (%) |
|------|-------------------|----------------------|-------------------|-------------------|---------------|
| 1    | PDA 254.0 nm      | 11.605               | 442.81454         | 12.53001          | 2.7671        |
| 2    | PDA 254.0 nm      | 14.283               | 1.55601e4         | 298.98843         | 97.2329       |



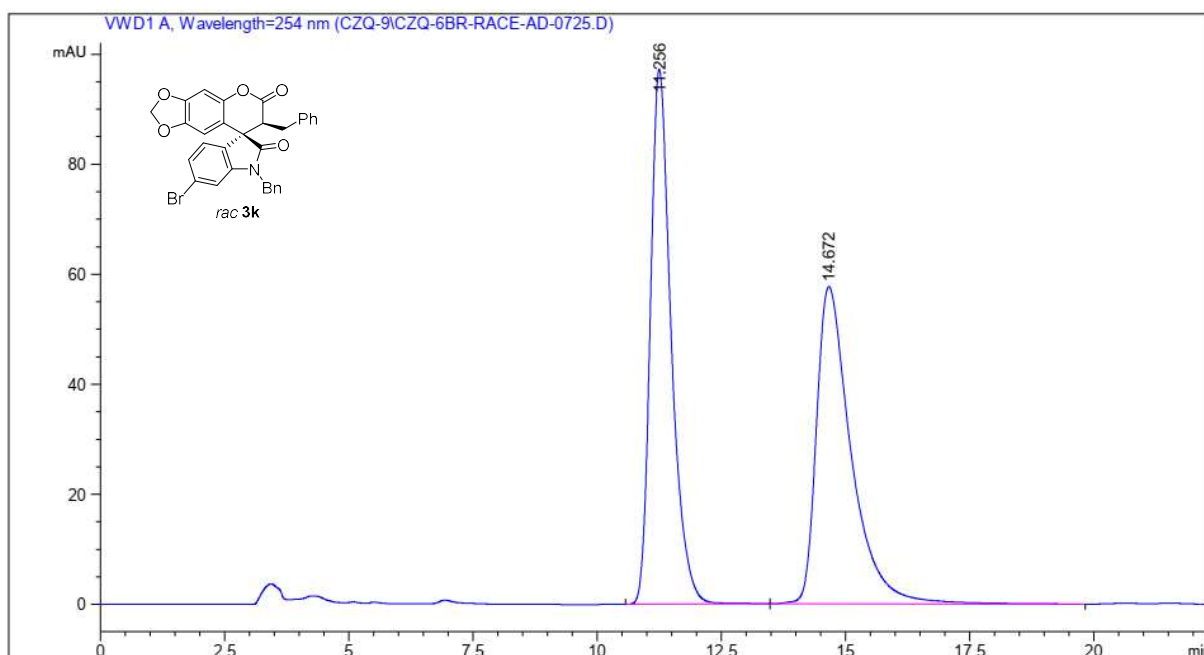

| Peak | Processed channel | Retention time (min) | Peak area (mAU*s) | Peak height (mAU) | Peak area (%) |
|------|-------------------|----------------------|-------------------|-------------------|---------------|
| 1    | PDA 254.0 nm      | 11.256               | 2829.21899        | 97.23276          | 50.2011       |
| 2    | PDA 254.0 nm      | 14.672               | 2806.55591        | 57.69843          | 49.7989       |

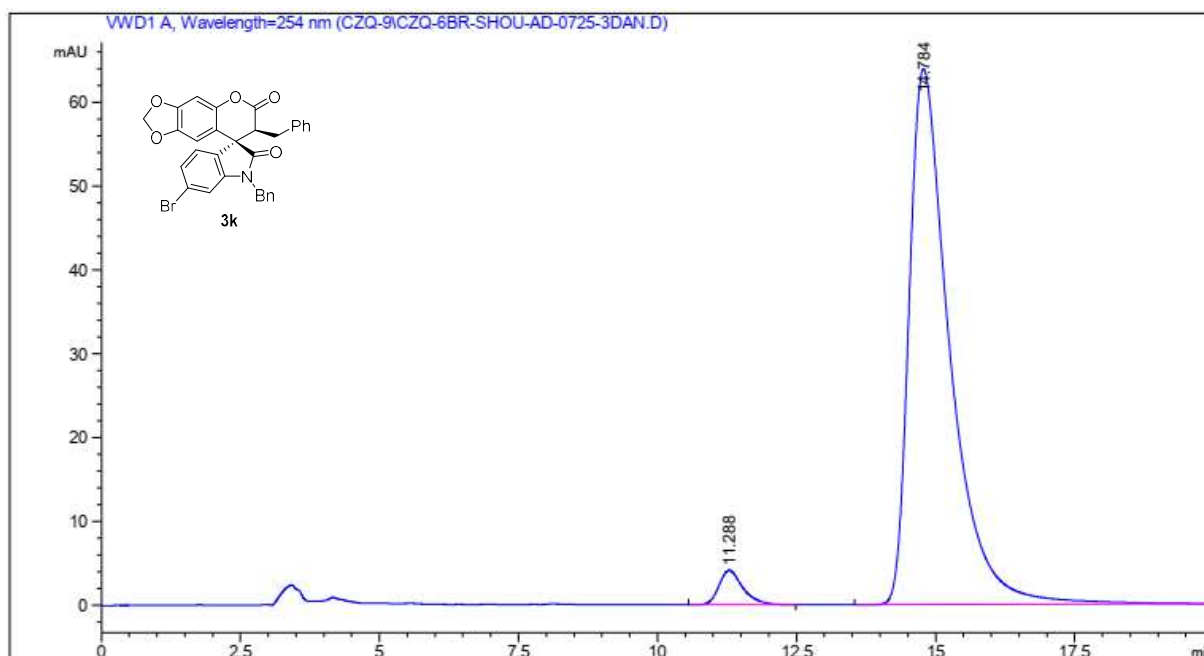

| Peak | Processed channel | Retention time (min) | Peak area (mAU*s) | Peak height (mAU) | Peak area (%) |
|------|-------------------|----------------------|-------------------|-------------------|---------------|
| 1    | PDA 254.0 nm      | 11.288               | 122.39032         | 4.11314           | 3.6318        |
| 2    | PDA 254.0 nm      | 14.784               | 3247.59912        | 63.87044          | 96.3682       |

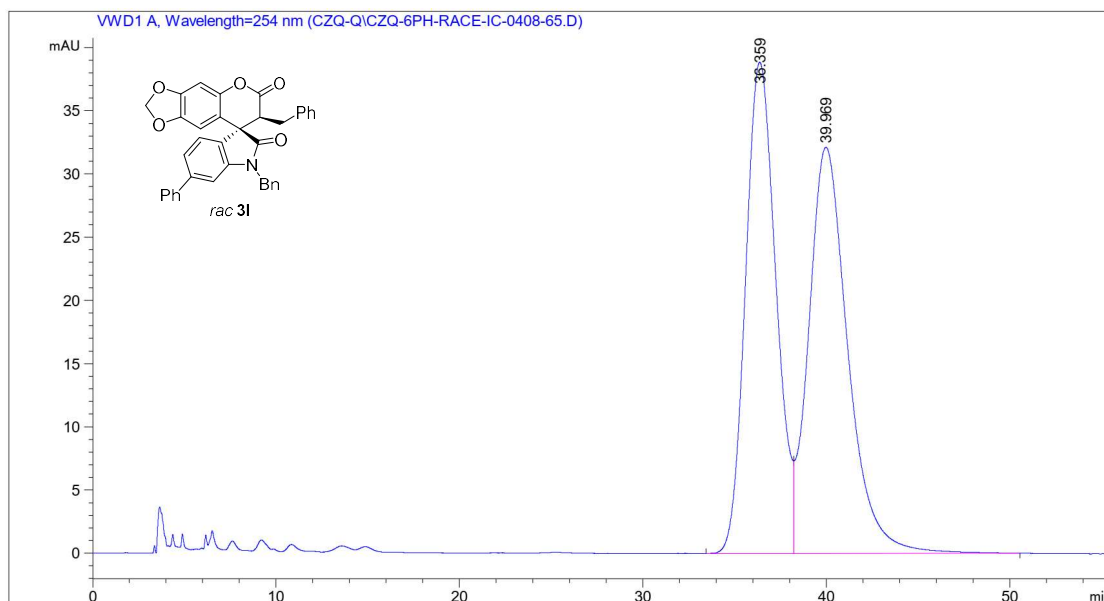

| Peak | Processed channel | Retention time (min) | Peak area (mAU*s) | Peak height (mAU) | Peak area (%) |
|------|-------------------|----------------------|-------------------|-------------------|---------------|
| 1    | PDA 254.0 nm      | 36.359               | 4481.51855        | 38.85182          | 48.4311       |
| 2    | PDA 254.0 nm      | 39.969               | 4771.86816        | 32.13577          | 51.5689       |

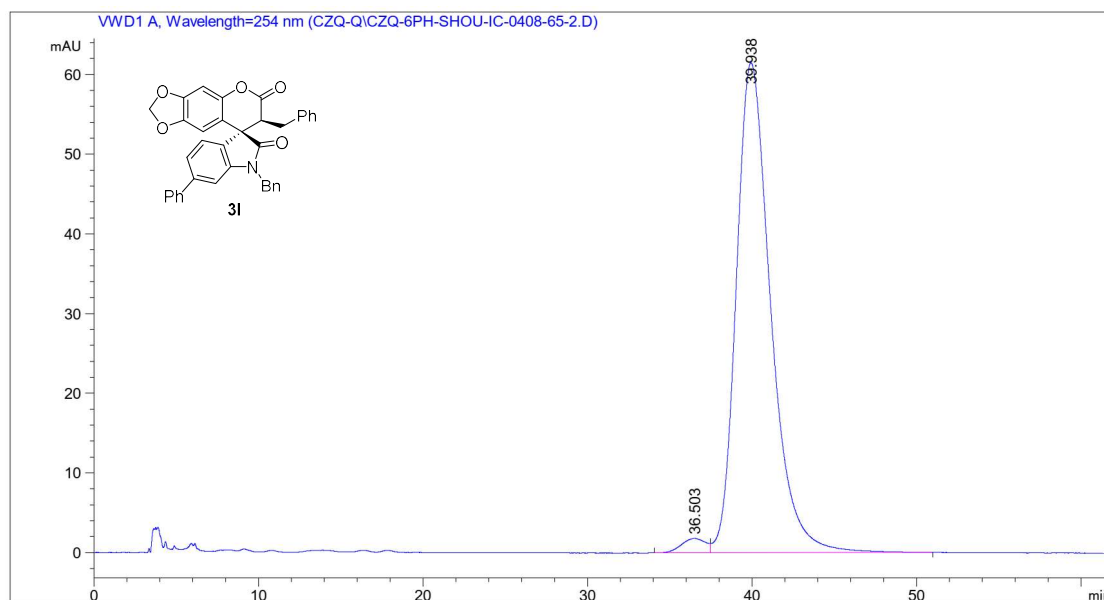

| Peak | Processed channel | Retention time (min) | Peak area (mAU*s) | Peak height (mAU) | Peak area (%) |
|------|-------------------|----------------------|-------------------|-------------------|---------------|
| 1    | PDA 254.0 nm      | 36.503               | 186.40221         | 1.80940           | 2.0438        |
| 2    | PDA 254.0 nm      | 39.938               | 8934.08887        | 61.50807          | 97.9562       |

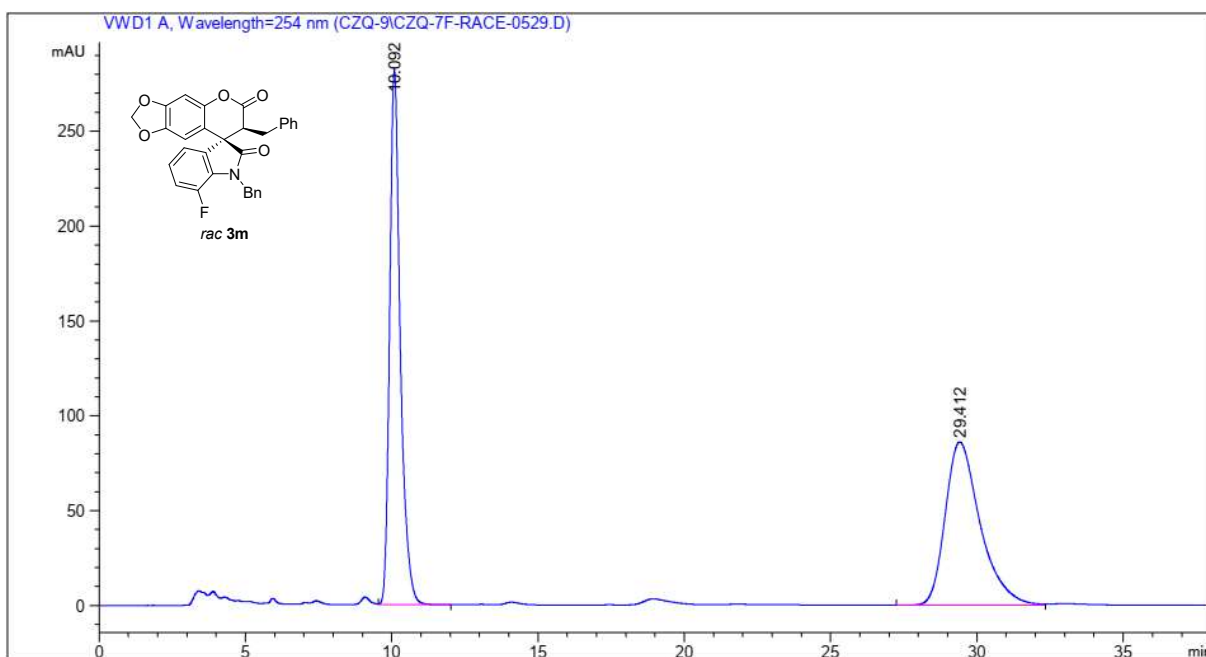

| Peak | Processed channel | Retention time (min) | Peak area (mAU*s) | Peak height (mAU) | Peak area (%) |
|------|-------------------|----------------------|-------------------|-------------------|---------------|
| 1    | PDA 254.0 nm      | 10.092               | 7129.82129        | 282.43674         | 49.9712       |
| 2    | PDA 254.0 nm      | 29.412               | 7138.04785        | 86.01691          | 50.0288       |

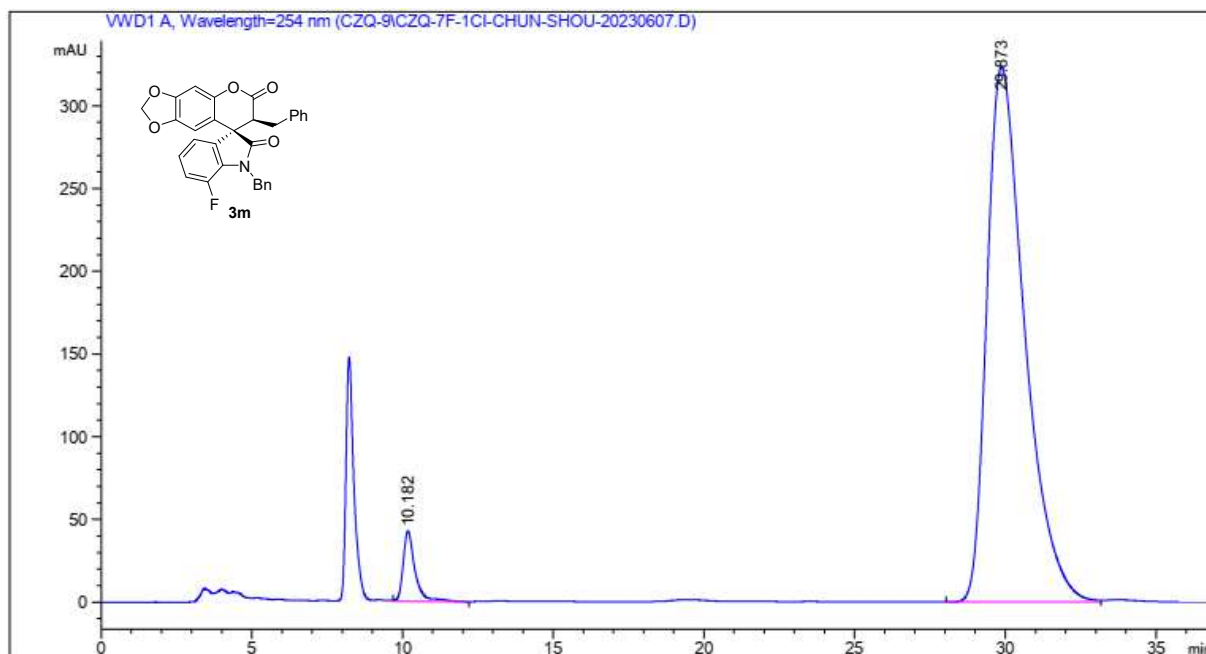

| Peak | Processed channel | Retention time (min) | Peak area (mAU*s) | Peak height (mAU) | Peak area (%) |
|------|-------------------|----------------------|-------------------|-------------------|---------------|
| 1    | PDA 254.0 nm      | 10.182               | 1158.47681        | 42.37434          | 3.9425        |
| 2    | PDA 254.0 nm      | 29.873               | 2.82258e4         | 323.31876         | 96.0575       |

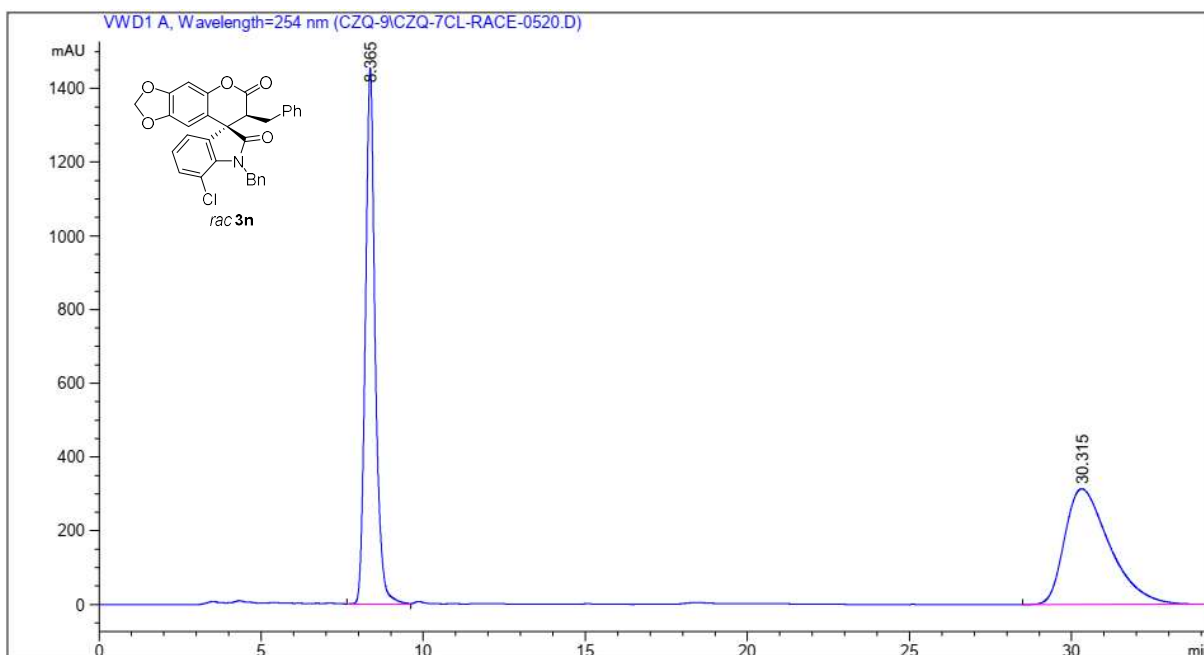

| Peak | Processed channel | Retention time (min) | Peak area (mAU*s) | Peak height (mAU) | Peak area (%) |
|------|-------------------|----------------------|-------------------|-------------------|---------------|
| 1    | PDA 254.0 nm      | 8.365                | 3.06129e4         | 1452.96033        | 50.3803       |
| 2    | PDA 254.0 nm      | 30.315               | 3.01507e4         | 313.56512         | 49.6197       |

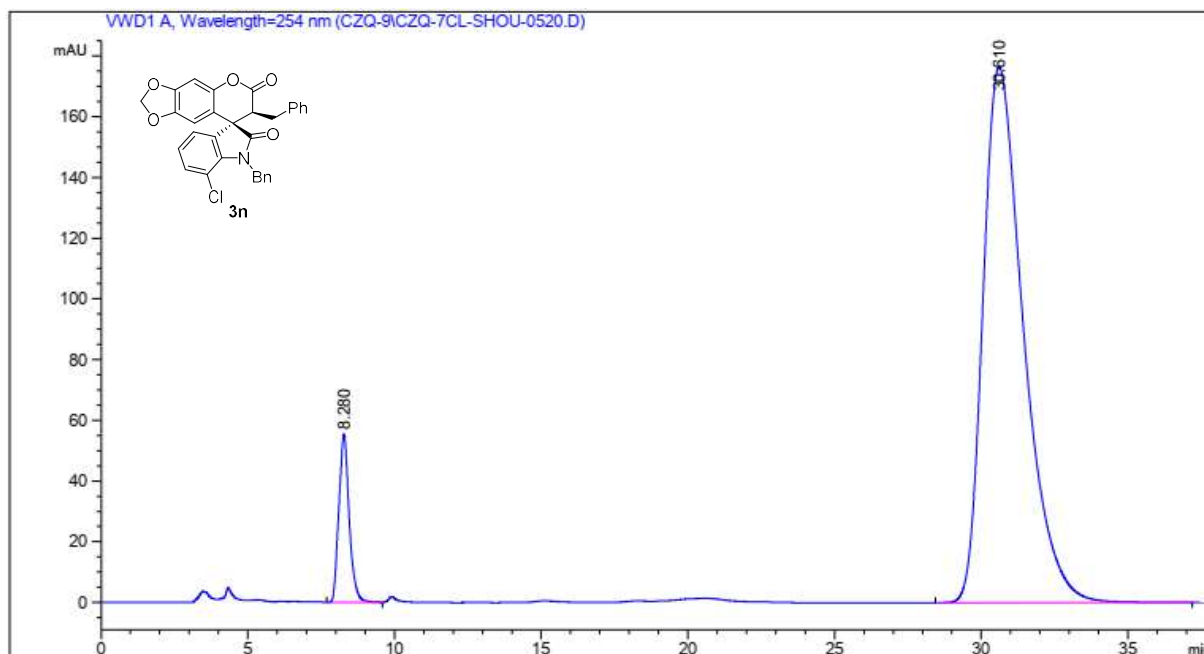

| Peak | Processed channel | Retention time (min) | Peak area (mAU*s) | Peak height (mAU) | Peak area (%) |
|------|-------------------|----------------------|-------------------|-------------------|---------------|
| 1    | PDA 254.0 nm      | 8.280                | 1358.41638        | 55.35059          | 7.4448        |
| 2    | PDA 254.0 nm      | 30.610               | 1.68880e4         | 176.36806         | 92.5552       |

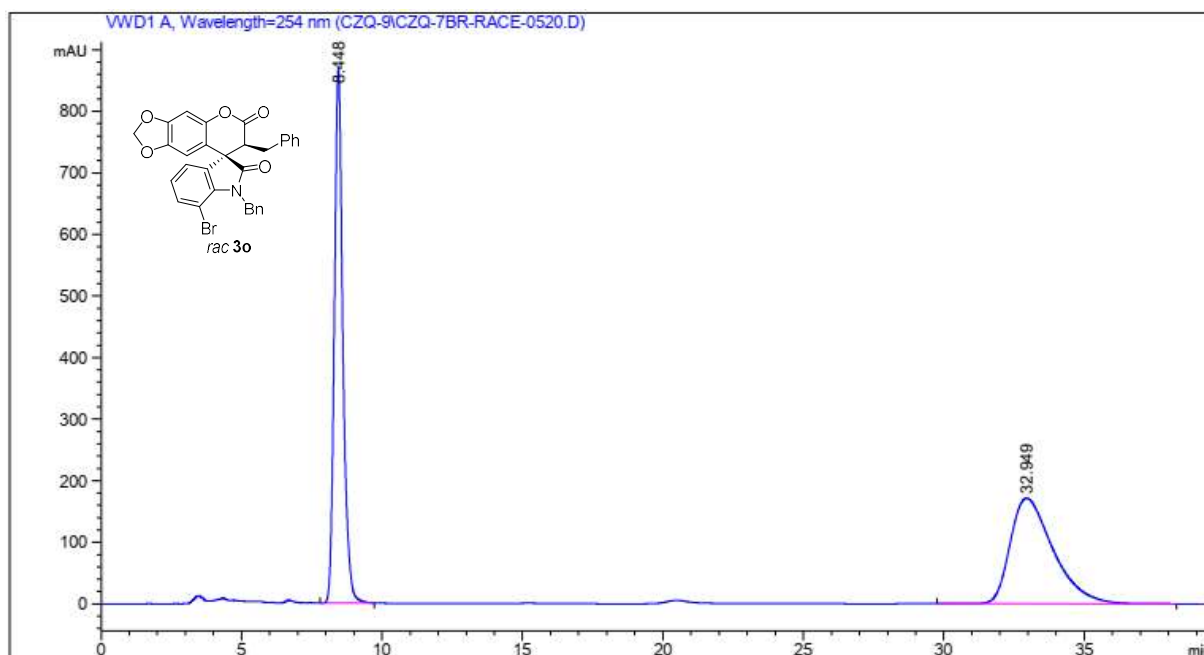

| Peak | Processed channel | Retention time (min) | Peak area (mAU*s) | Peak height (mAU) | Peak area (%) |
|------|-------------------|----------------------|-------------------|-------------------|---------------|
| 1    | PDA 254.0 nm      | 8.448                | 1.83382e4         | 868.62122         | 50.1431       |
| 2    | PDA 254.0 nm      | 32.949               | 1.82336e4         | 171.35616         | 49.8569       |

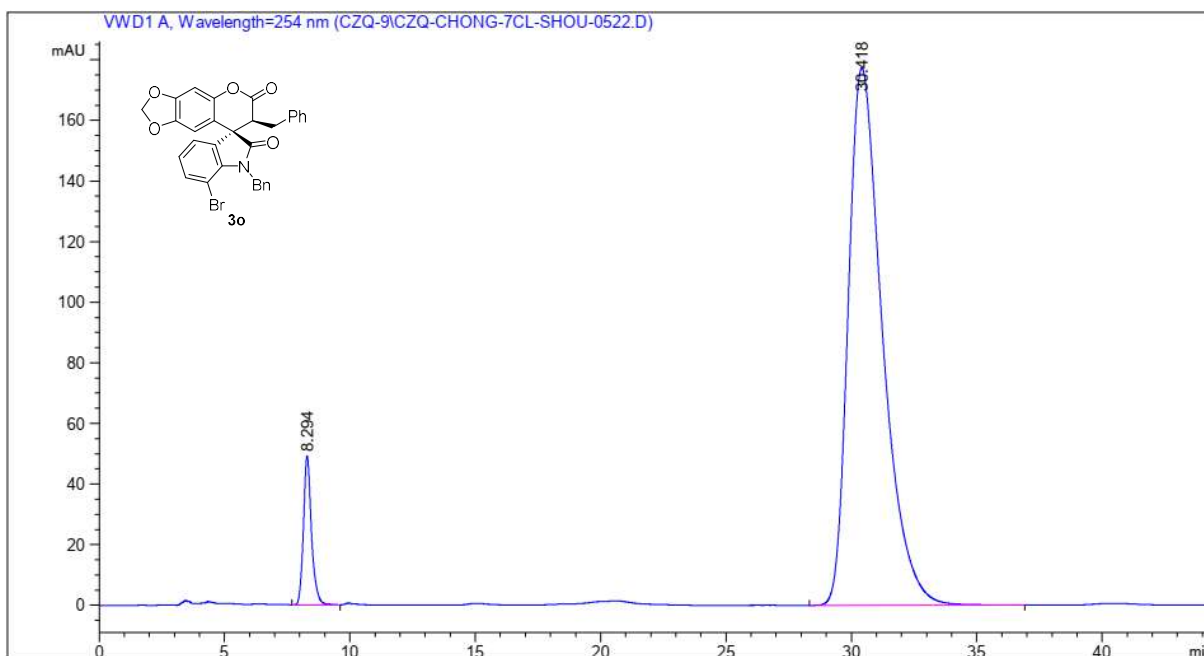

| Peak | Processed channel | Retention time (min) | Peak area (mAU*s) | Peak height (mAU) | Peak area (%) |
|------|-------------------|----------------------|-------------------|-------------------|---------------|
| 1    | PDA 254.0 nm      | 8.294                | 1095.21509        | 49.18624          | 6.1346        |
| 2    | PDA 254.0 nm      | 30.418               | 1.67578e4         | 177.28758         | 93.8654       |

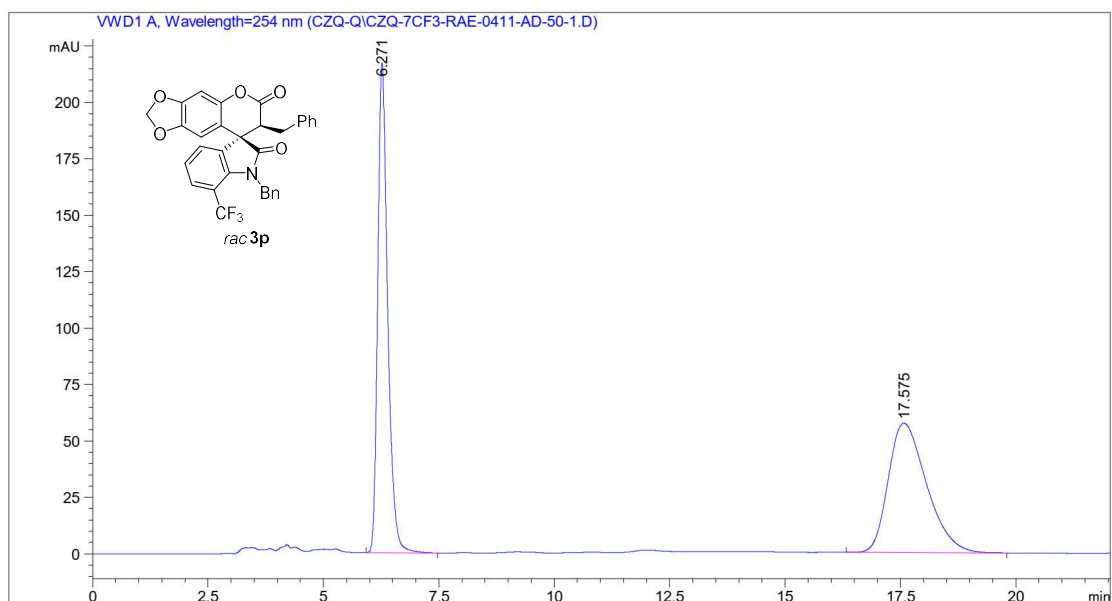

| Peak | Processed channel | Retention time (min) | Peak area (mAU*s) | Peak height (mAU) | Peak area (%) |
|------|-------------------|----------------------|-------------------|-------------------|---------------|
| 1    | PDA 254.0 nm      | 6.271                | 3226.35620        | 216.76897         | 49.4366       |
| 2    | PDA 254.0 nm      | 17.575               | 3299.89990        | 57.33051          | 50.5634       |

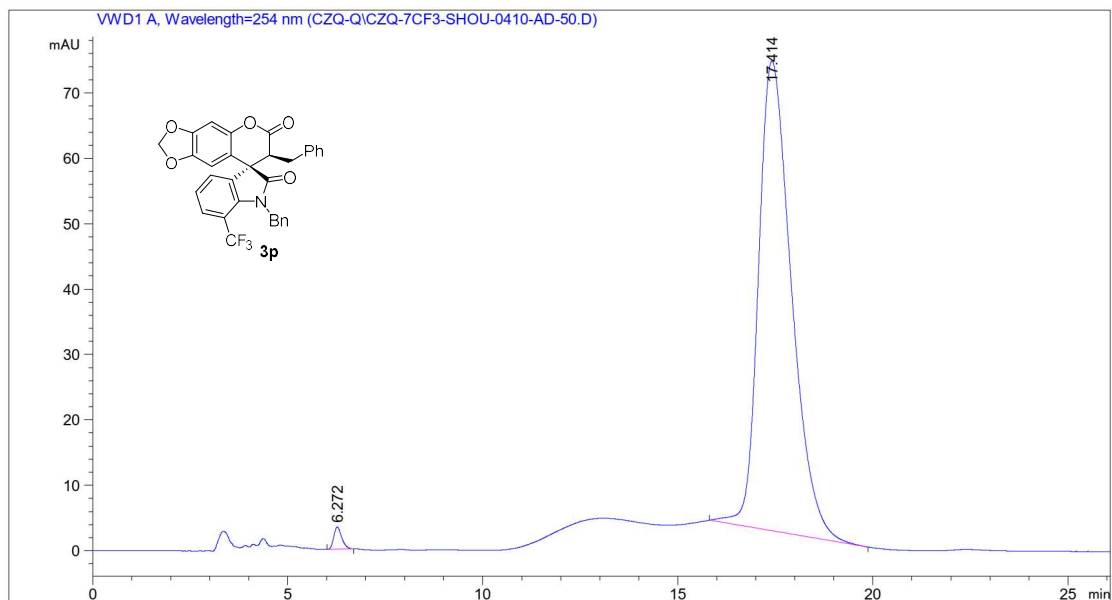

| Peak | Processed channel | Retention time (min) | Peak area (mAU*s) | Peak height (mAU) | Peak area (%) |
|------|-------------------|----------------------|-------------------|-------------------|---------------|
| 1    | PDA 254.0 nm      | 6.272                | 48.58934          | 3.41051           | 1.1407        |
| 2    | PDA 254.0 nm      | 17.414               | 4211.00342        | 71.82191          | 98.8593       |

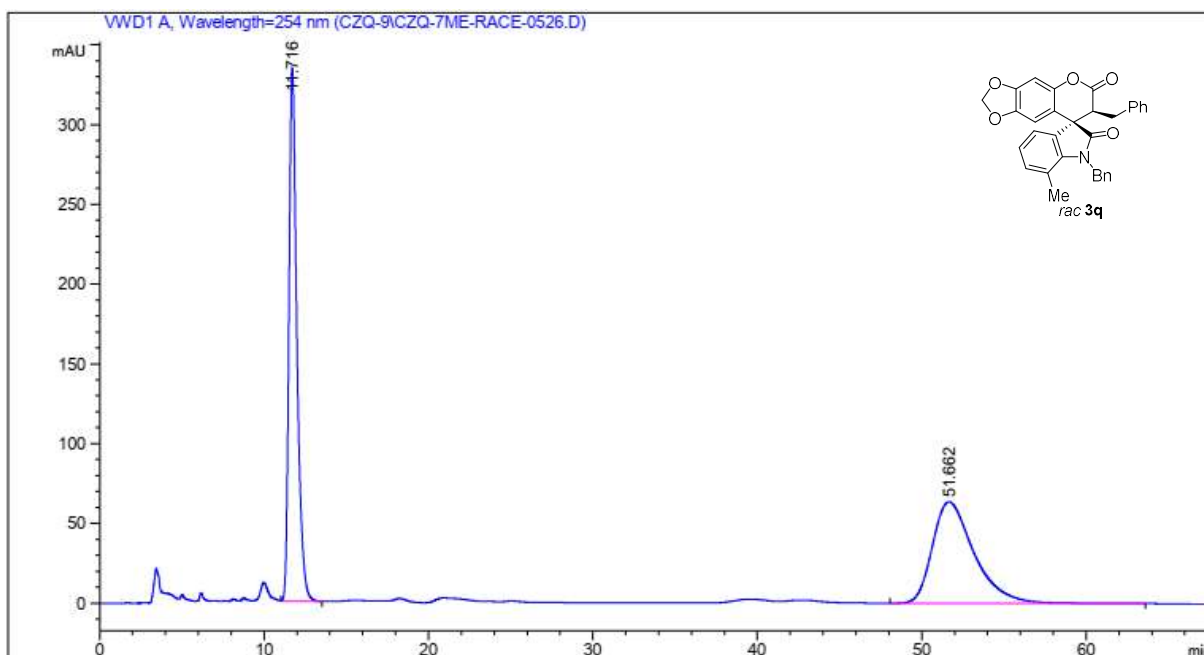

| Peak | Processed channel | Retention time (min) | Peak area (mAU*s) | Peak height (mAU) | Peak area (%) |
|------|-------------------|----------------------|-------------------|-------------------|---------------|
| 1    | PDA 254.0 nm      | 11.716               | 1.12275e4         | 334.22433         | 50.0589       |
| 2    | PDA 254.0 nm      | 51.662               | 1.12011e4         | 63.60102          | 49.9411       |

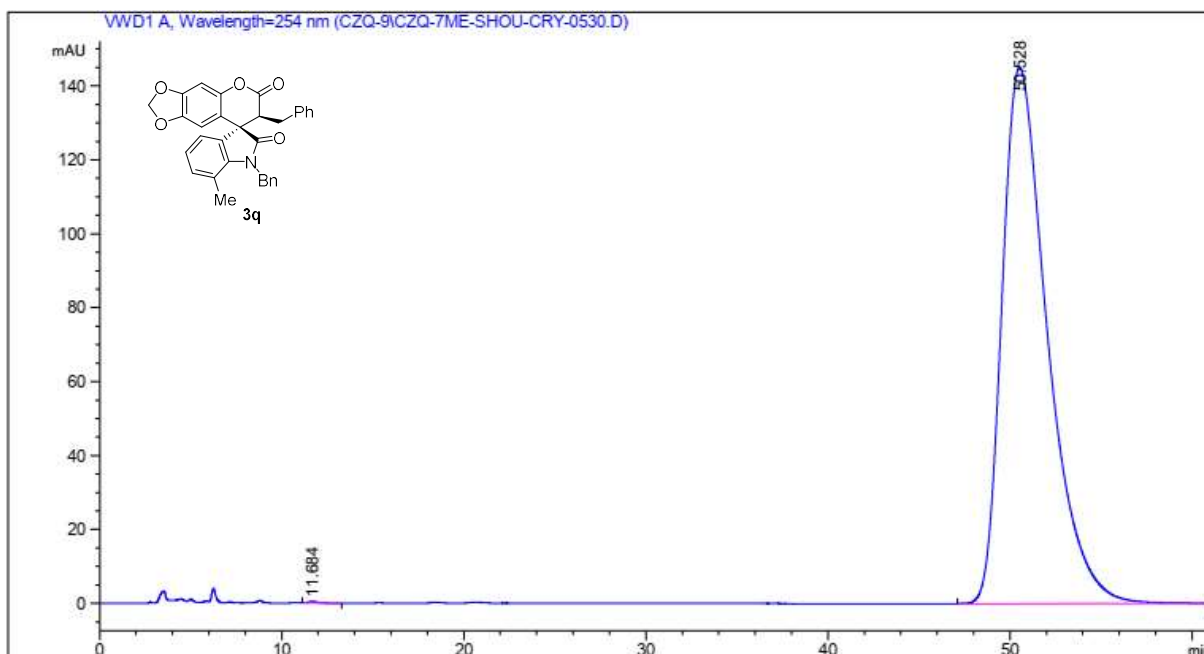

| Peak | Processed channel | Retention time (min) | Peak area (mAU*s) | Peak height (mAU) | Peak area (%) |
|------|-------------------|----------------------|-------------------|-------------------|---------------|
| 1    | PDA 254.0 nm      | 11.684               | 15.39236          | 4.63013e-1        | 0.0615        |
| 2    | PDA 254.0 nm      | 50.528               | 2.50232e4         | 144.96622         | 99.9385       |

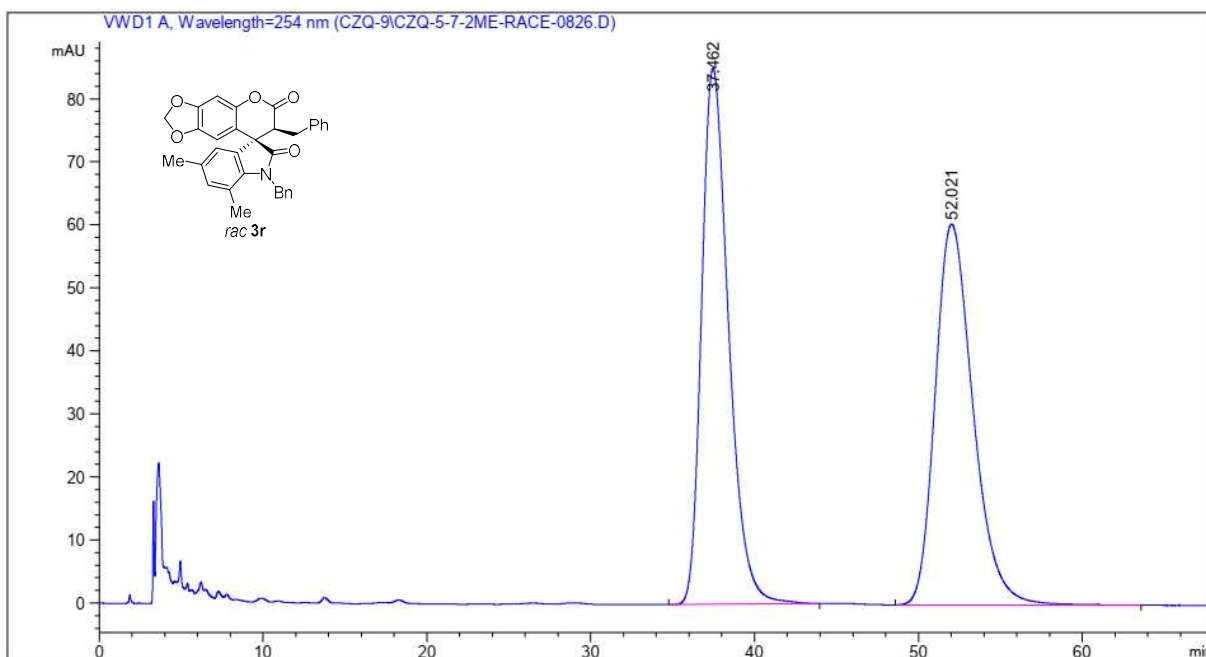

| Peak | Processed channel | Retention time (min) | Peak area (mAU*s) | Peak height (mAU) | Peak area (%) |
|------|-------------------|----------------------|-------------------|-------------------|---------------|
| 1    | PDA 254.0 nm      | 37.462               | 9724.91895        | 85.07308          | 50.0888       |
| 2    | PDA 254.0 nm      | 52.021               | 9690.44727        | 60.43052          | 49.9112       |

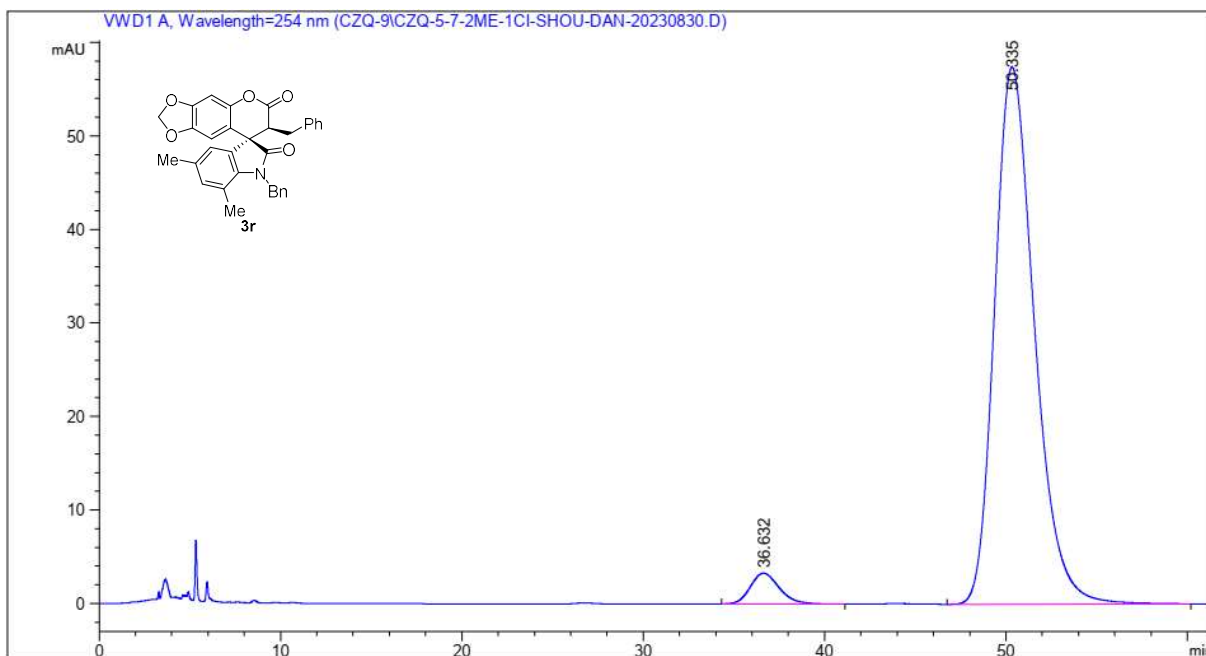

| Peak | Processed channel | Retention time (min) | Peak area (mAU*s) | Peak height (mAU) | Peak area (%) |
|------|-------------------|----------------------|-------------------|-------------------|---------------|
| 1    | PDA 254.0 nm      | 36.632               | 370.03708         | 3.29934           | 4.0523        |
| 2    | PDA 254.0 nm      | 50.335               | 8761.46484        | 57.45690          | 95.9477       |



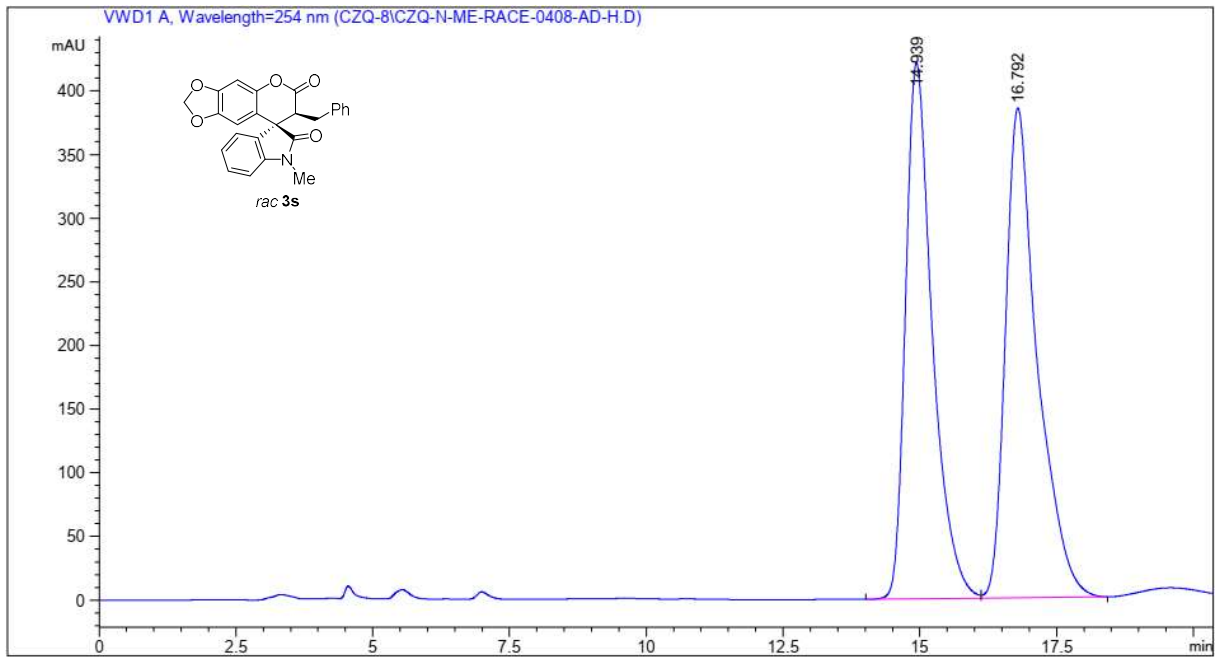

| Peak | Processed channel | Retention time (min) | Peak area (mAU*s) | Peak height (mAU) | Peak area (%) |
|------|-------------------|----------------------|-------------------|-------------------|---------------|
| 1    | PDA 254.0 nm      | 14.939               | 1.43572e4         | 421.01617         | 47.9185       |
| 2    | PDA 254.0 nm      | 16.792               | 1.56045e4         | 384.70831         | 52.0815       |

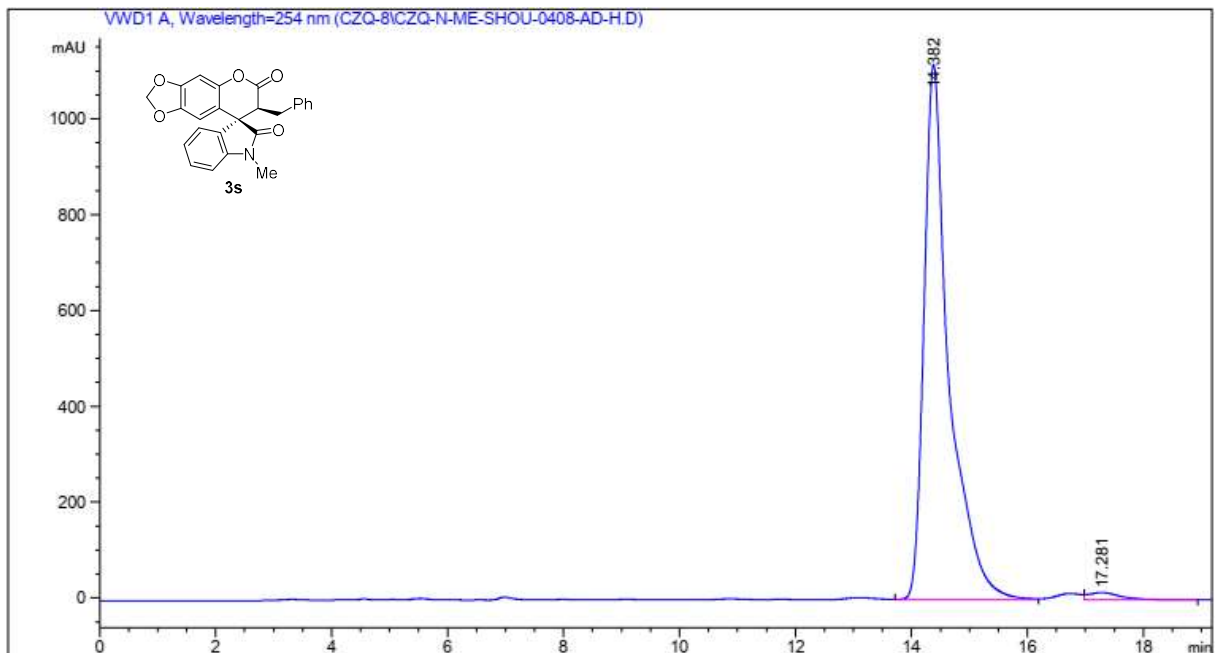

| Peak | Processed channel | Retention time (min) | Peak area (mAU*s) | Peak height (mAU) | Peak area (%) |
|------|-------------------|----------------------|-------------------|-------------------|---------------|
| 1    | PDA 254.0 nm      | 14.382               | 3.33993e4         | 1116.60913        | 98.2518       |
| 2    | PDA 254.0 nm      | 17.281               | 594.26111         | 15.22666          | 1.7482        |

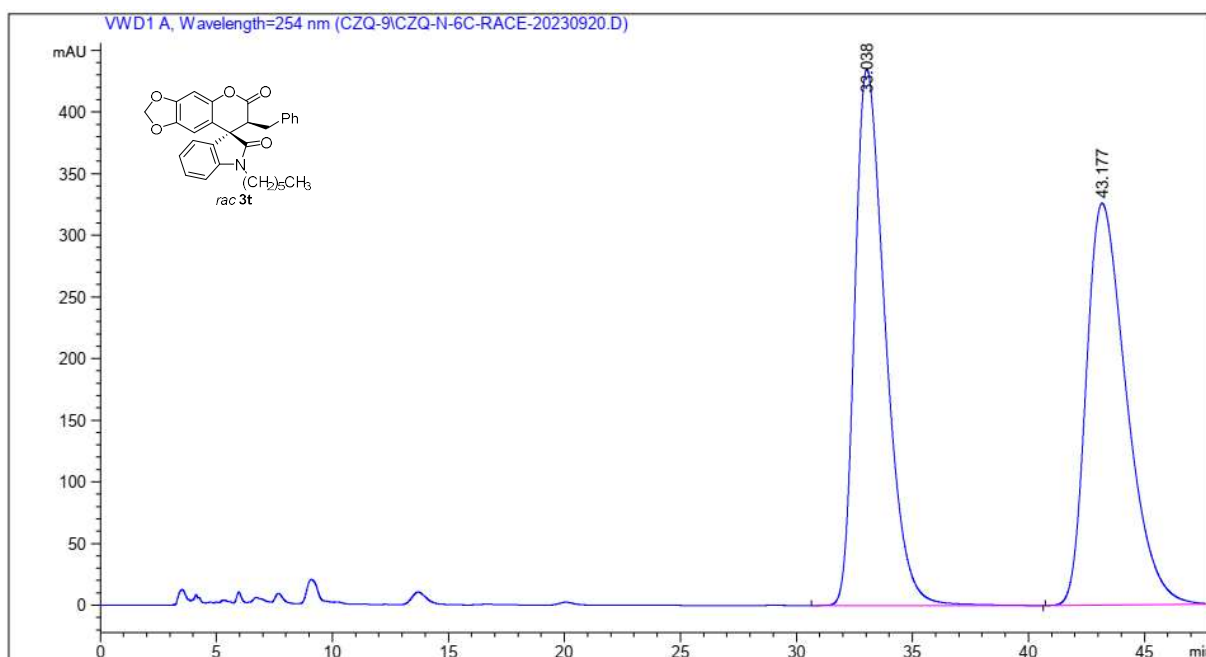

| Peak | Processed channel | Retention time (min) | Peak area (mAU*s) | Peak height (mAU) | Peak area (%) |
|------|-------------------|----------------------|-------------------|-------------------|---------------|
| 1    | PDA 254.0 nm      | 33.038               | 3.96307e4         | 434.77213         | 50.3390       |
| 2    | PDA 254.0 nm      | 43.177               | 3.90969e4         | 325.79700         | 49.6610       |

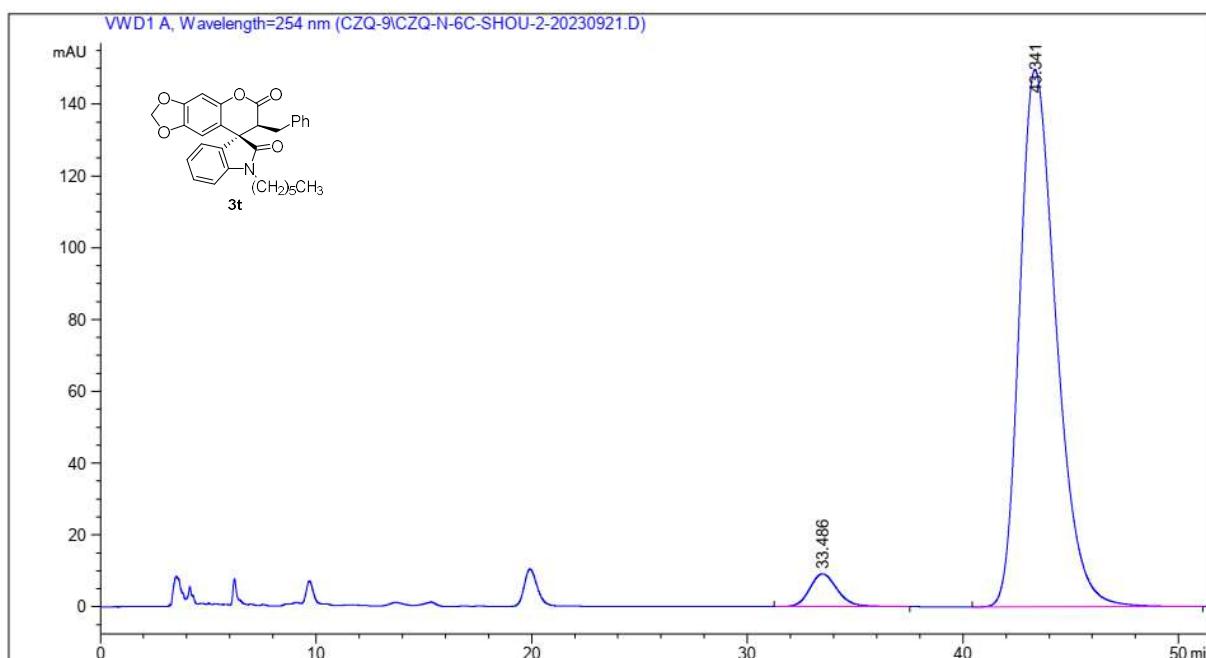

| Peak | Processed channel | Retention time (min) | Peak area (mAU*s) | Peak height (mAU) | Peak area (%) |
|------|-------------------|----------------------|-------------------|-------------------|---------------|
| 1    | PDA 254.0 nm      | 33.486               | 815.66412         | 9.14215           | 4.4241        |
| 2    | PDA 254.0 nm      | 43.341               | 1.76213e4         | 149.67892         | 95.5759       |

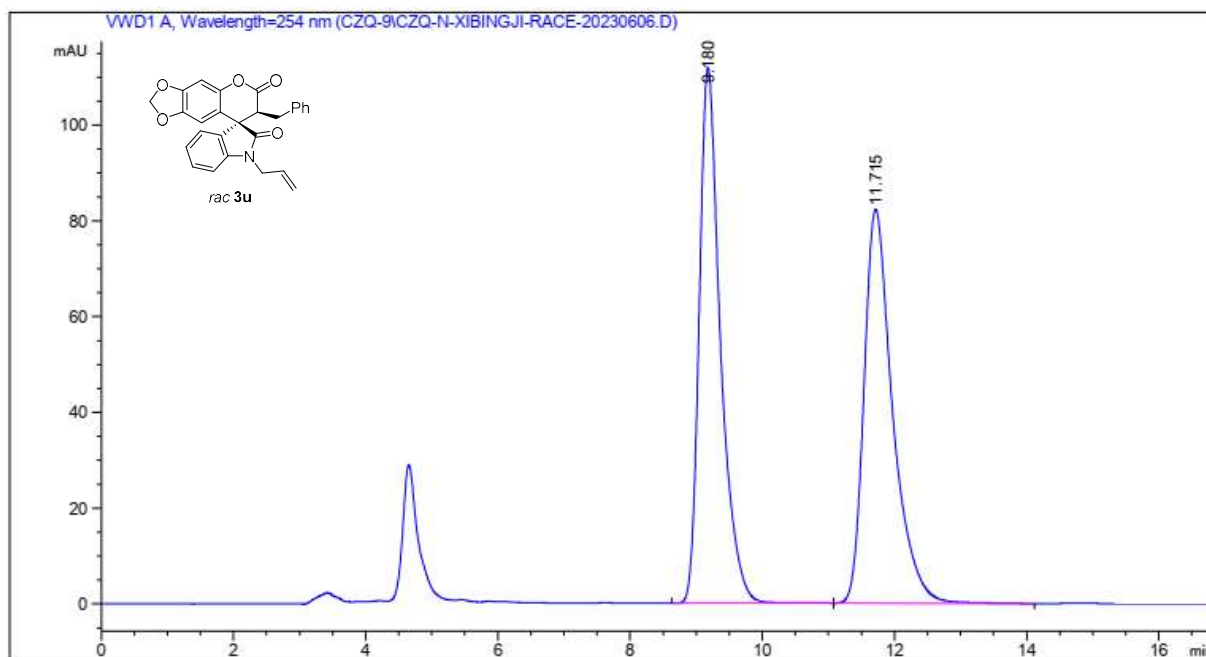

| Peak | Processed channel | Retention time (min) | Peak area (mAU*s) | Peak height (mAU) | Peak area (%) |
|------|-------------------|----------------------|-------------------|-------------------|---------------|
| 1    | PDA 254.0 nm      | 9.180                | 2486.61792        | 111.79607         | 50.2074       |
| 2    | PDA 254.0 nm      | 11.715               | 2466.07227        | 82.20253          | 49.7926       |

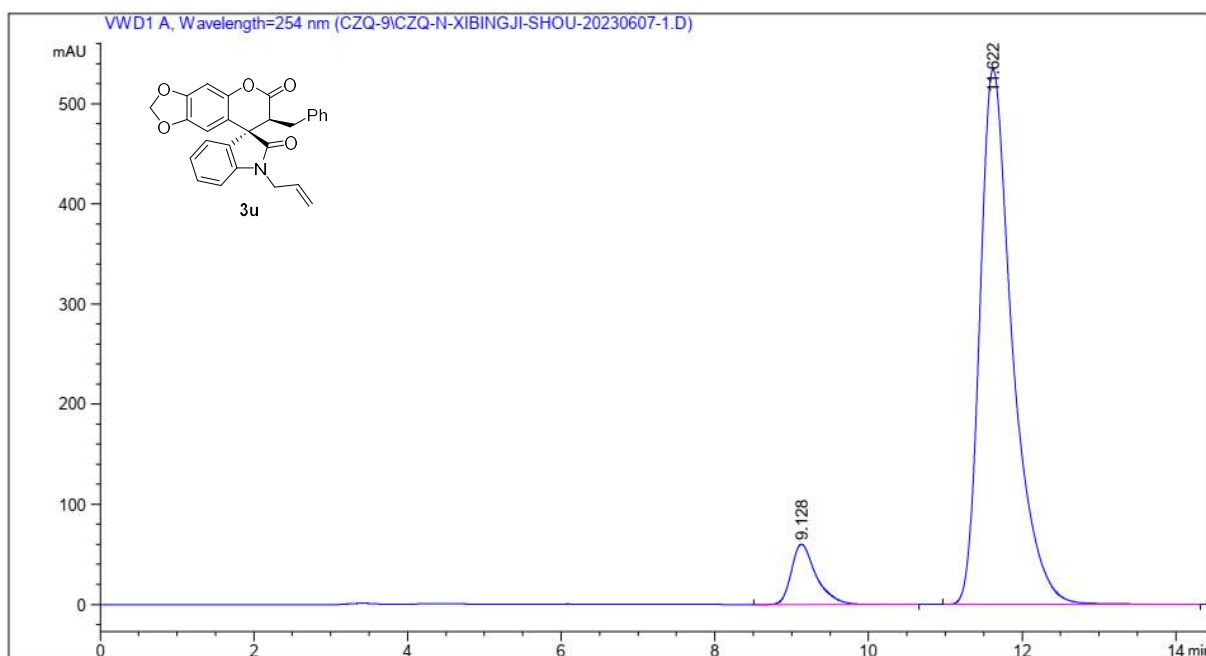

| Peak | Processed channel | Retention time (min) | Peak area (mAU*s) | Peak height (mAU) | Peak area (%) |
|------|-------------------|----------------------|-------------------|-------------------|---------------|
| 1    | PDA 254.0 nm      | 9.128                | 1343.22522        | 60.08673          | 7.8884        |
| 2    | PDA 254.0 nm      | 11.622               | 1.56847e4         | 534.42255         | 92.1116       |

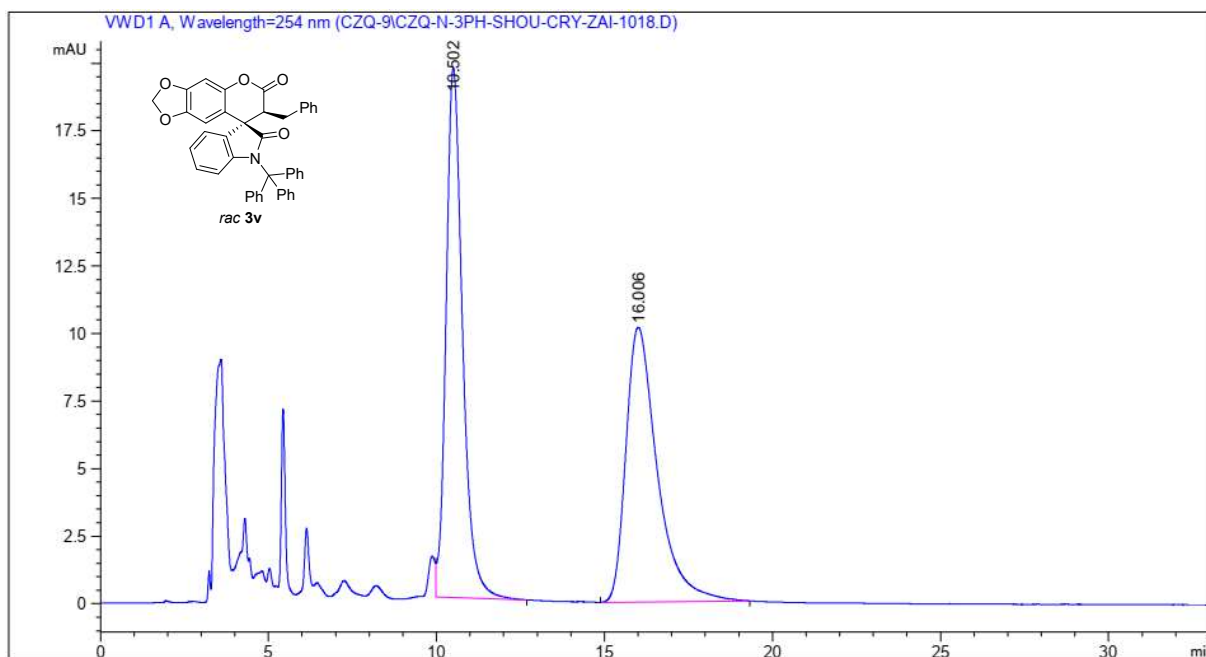

| Peak | Processed channel | Retention time (min) | Peak area (mAU*s) | Peak height (mAU) | Peak area (%) |
|------|-------------------|----------------------|-------------------|-------------------|---------------|
| 1    | PDA 254.0 nm      | 10.502               | 669.06635         | 19.60707          | 50.3768       |
| 2    | PDA 254.0 nm      | 16.006               | 659.05719         | 10.16693          | 49.6232       |

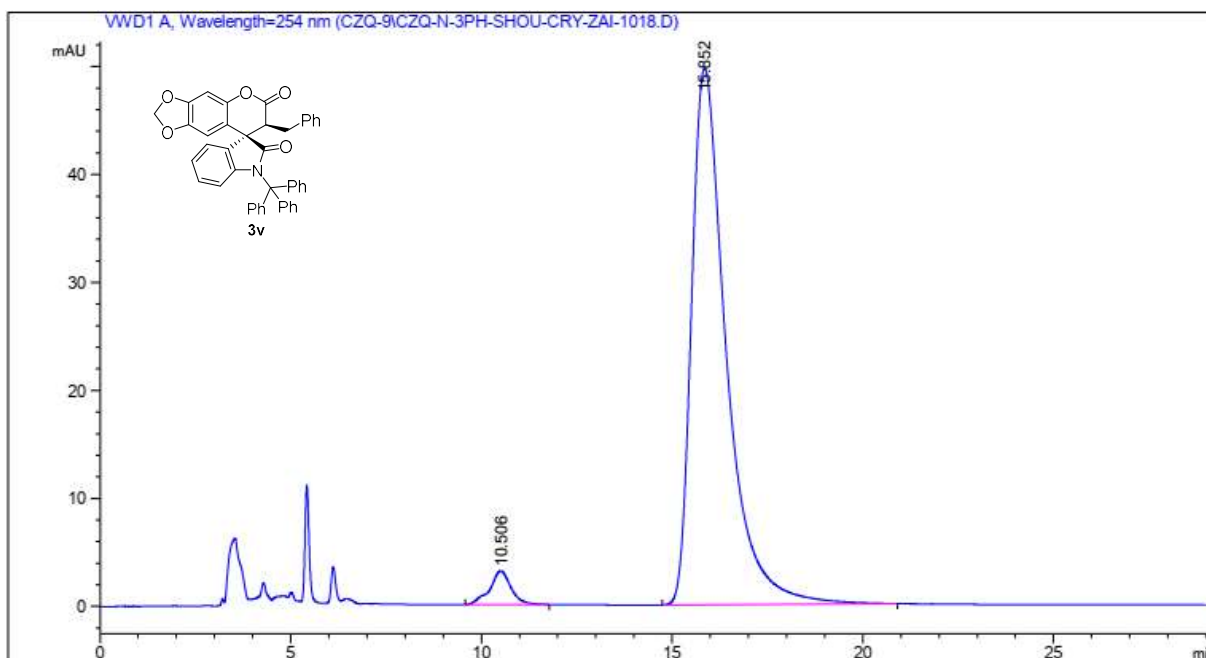

| Peak | Processed channel | Retention time (min) | Peak area (mAU*s) | Peak height (mAU) | Peak area (%) |
|------|-------------------|----------------------|-------------------|-------------------|---------------|
| 1    | PDA 254.0 nm      | 10.506               | 120.86175         | 3.11864           | 3.7128        |
| 2    | PDA 254.0 nm      | 15.852               | 3134.41333        | 49.69964          | 96.2872       |

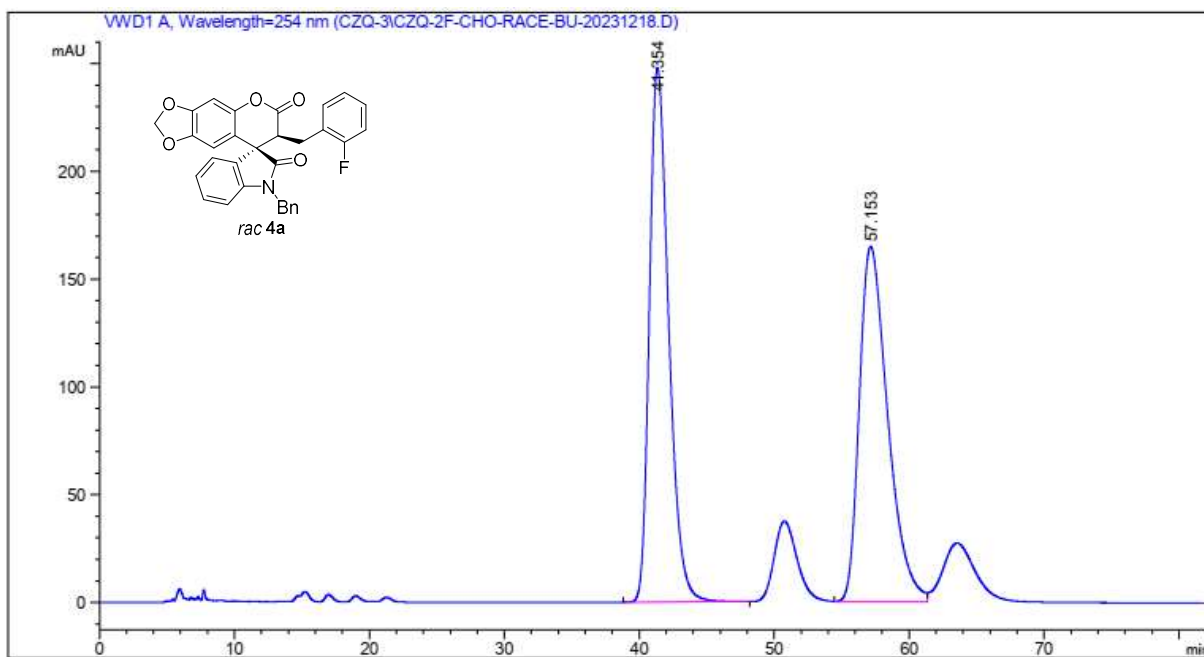

| Peak | Processed channel | Retention time (min) | Peak area (mAU*s) | Peak height (mAU) | Peak area (%) |
|------|-------------------|----------------------|-------------------|-------------------|---------------|
| 1    | PDA 254.0 nm      | 41.354               | 2.45646e4         | 247.87384         | 50.4086       |
| 2    | PDA 254.0 nm      | 57.153               | 2.41663e4         | 164.88376         | 49.5914       |

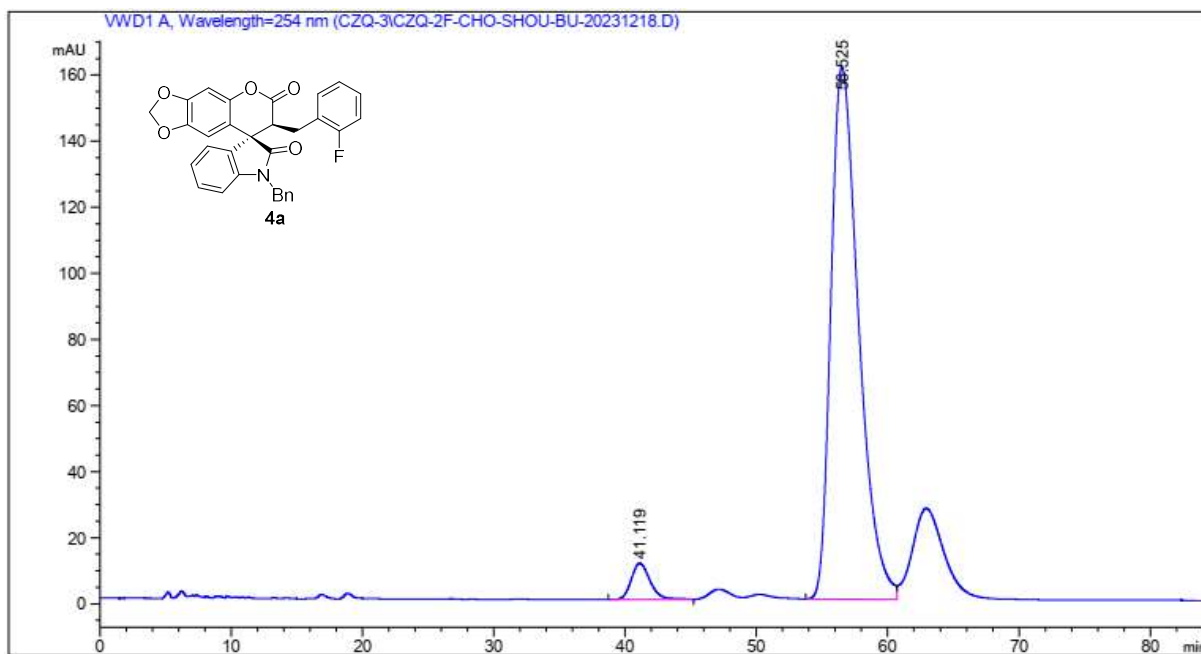

| Peak | Processed channel | Retention time (min) | Peak area (mAU*s) | Peak height (mAU) | Peak area (%) |
|------|-------------------|----------------------|-------------------|-------------------|---------------|
| 1    | PDA 254.0 nm      | 41.119               | 1095.81348        | 10.97163          | 4.4351        |
| 2    | PDA 254.0 nm      | 56.525               | 2.36119e4         | 161.06013         | 95.5649       |

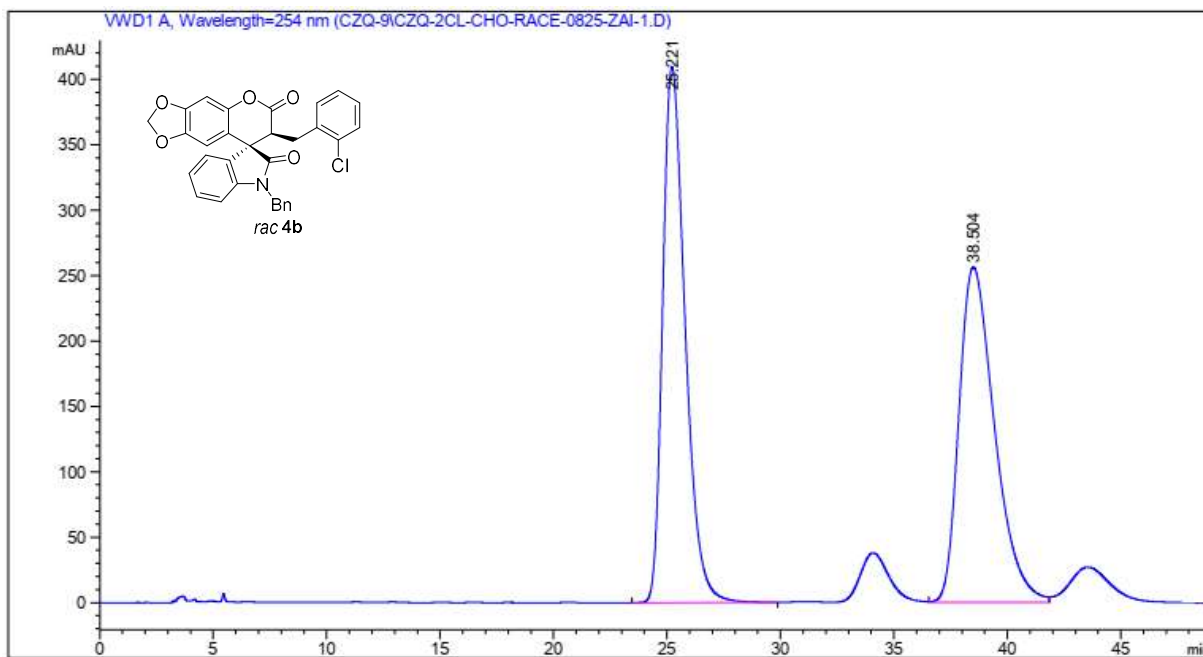

| Peak | Processed channel | Retention time (min) | Peak area (mAU*s) | Peak height (mAU) | Peak area (%) |
|------|-------------------|----------------------|-------------------|-------------------|---------------|
| 1    | PDA 254.0 nm      | 25.221               | 2.81150e4         | 409.46027         | 50.1642       |
| 2    | PDA 254.0 nm      | 38.504               | 2.79309e4         | 256.25357         | 49.8358       |

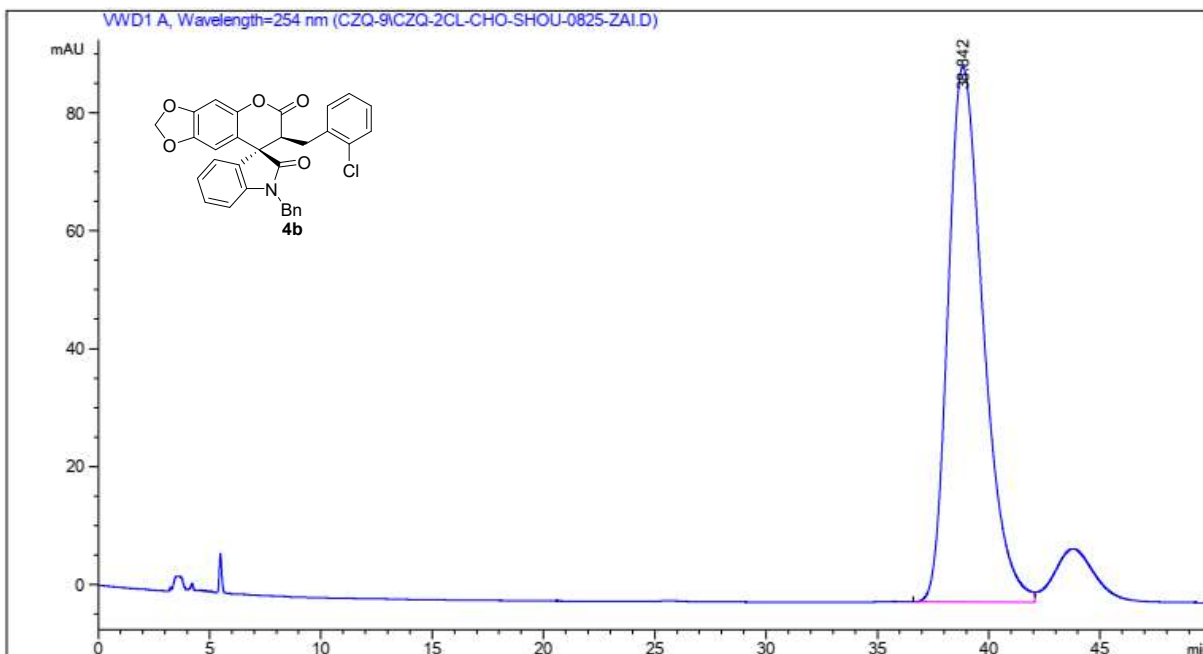

| Peak | Processed channel | Retention time (min) | Peak area (mAU*s) | Peak height (mAU) | Peak area (%) |
|------|-------------------|----------------------|-------------------|-------------------|---------------|
| 1    | PDA 254.0 nm      | 38.842               | 9957.25098        | 90.86143          | 100.0000      |

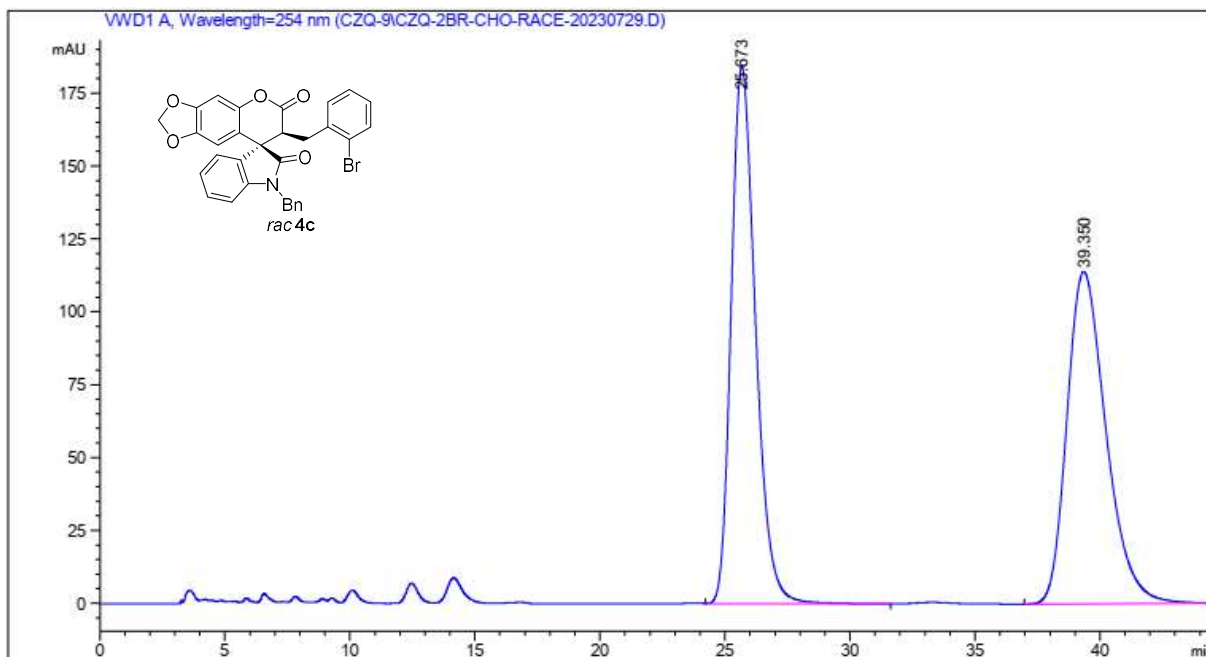

| Peak | Processed channel | Retention time (min) | Peak area (mAU*s) | Peak height (mAU) | Peak area (%) |
|------|-------------------|----------------------|-------------------|-------------------|---------------|
| 1    | PDA 254.0 nm      | 25.673               | 1.24970e4         | 184.39963         | 50.2575       |
| 2    | PDA 254.0 nm      | 39.350               | 1.23689e4         | 113.93971         | 49.7425       |

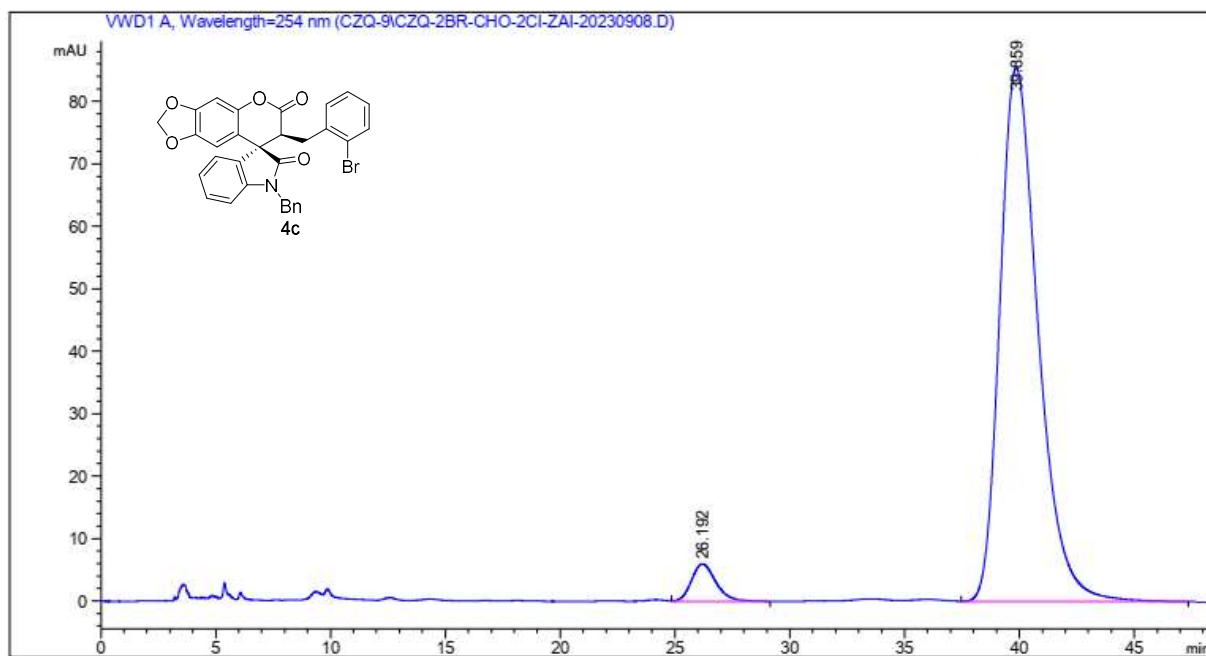

| Peak | Processed channel | Retention time (min) | Peak area (mAU*s) | Peak height (mAU) | Peak area (%) |
|------|-------------------|----------------------|-------------------|-------------------|---------------|
| 1    | PDA 254.0 nm      | 26.192               | 441.03802         | 5.97378           | 4.2782        |
| 2    | PDA 254.0 nm      | 39.859               | 9868.03516        | 85.50339          | 95.7218       |

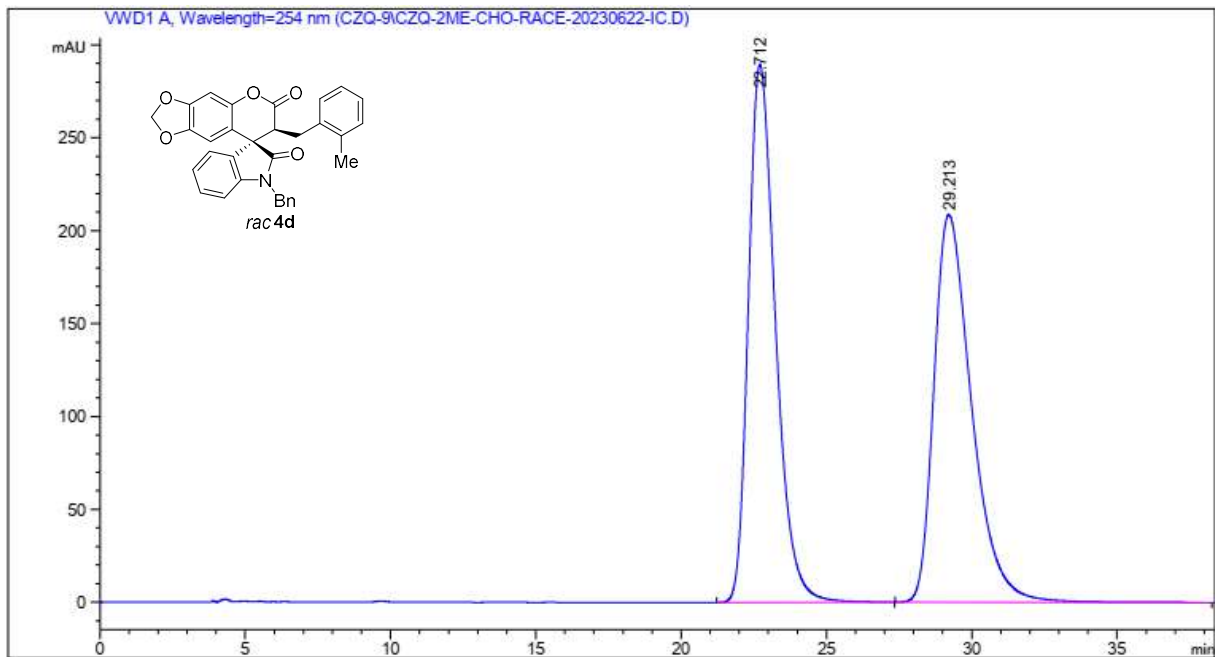

| Peak | Processed channel | Retention time (min) | Peak area (mAU*s) | Peak height (mAU) | Peak area (%) |
|------|-------------------|----------------------|-------------------|-------------------|---------------|
| 1    | PDA 254.0 nm      | 22.712               | 1.87539e4         | 289.43787         | 50.0120       |
| 2    | PDA 254.0 nm      | 29.213               | 1.87449e4         | 208.50301         | 49.9880       |

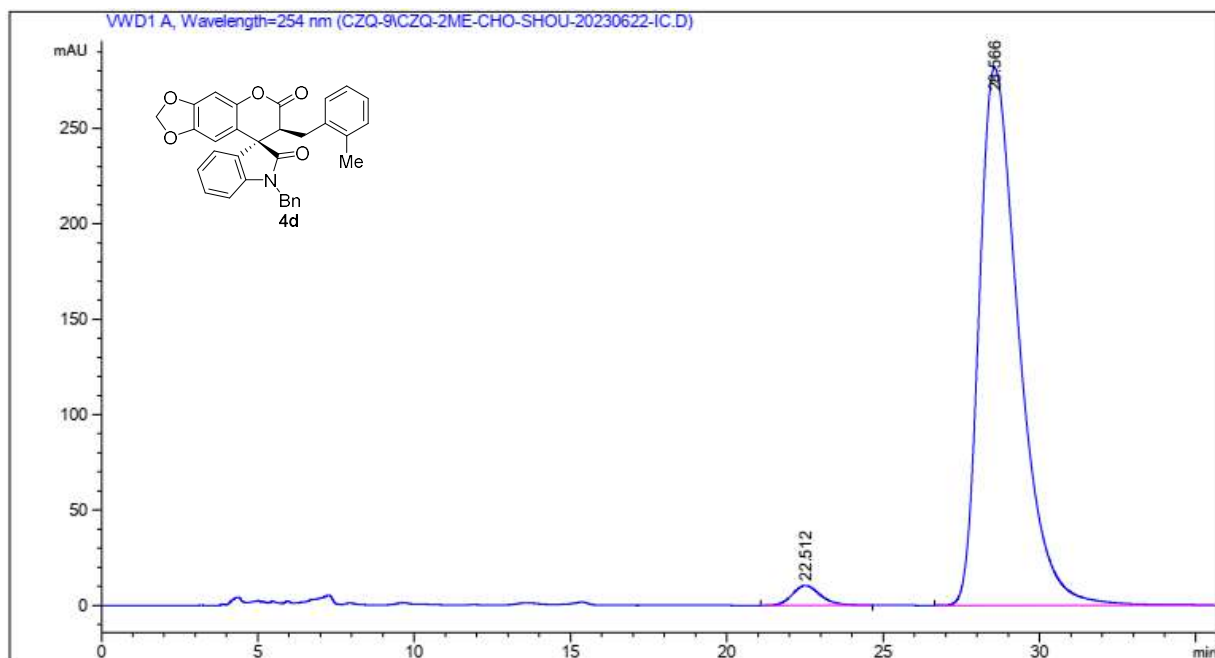

| Peak | Processed channel | Retention time (min) | Peak area (mAU*s) | Peak height (mAU) | Peak area (%) |
|------|-------------------|----------------------|-------------------|-------------------|---------------|
| 1    | PDA 254.0 nm      | 22.512               | 647.56964         | 10.37674          | 2.5563        |
| 2    | PDA 254.0 nm      | 28.566               | 2.46852e4         | 281.76318         | 97.4437       |



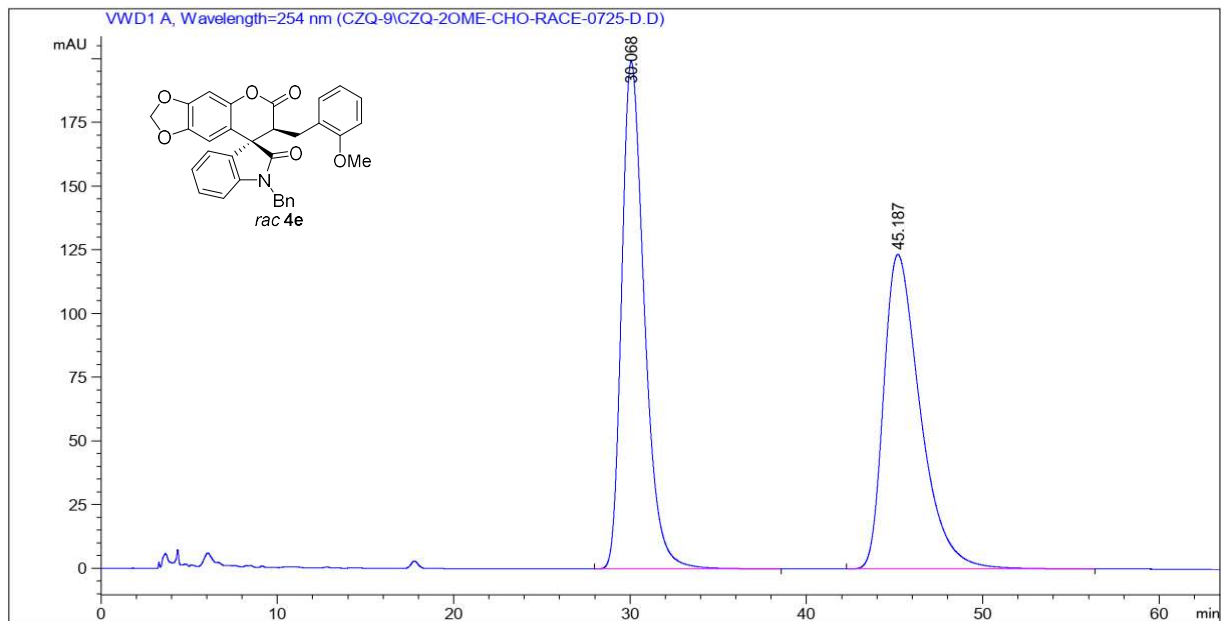

| Peak | Processed channel | Retention time (min) | Peak area (mAU*s) | Peak height (mAU) | Peak area (%) |
|------|-------------------|----------------------|-------------------|-------------------|---------------|
| 1    | PDA 254.0 nm      | 30.068               | 1.77979e4         | 199.15611         | 49.9972       |
| 2    | PDA 254.0 nm      | 45.187               | 1.77999e4         | 123.38029         | 50.0028       |

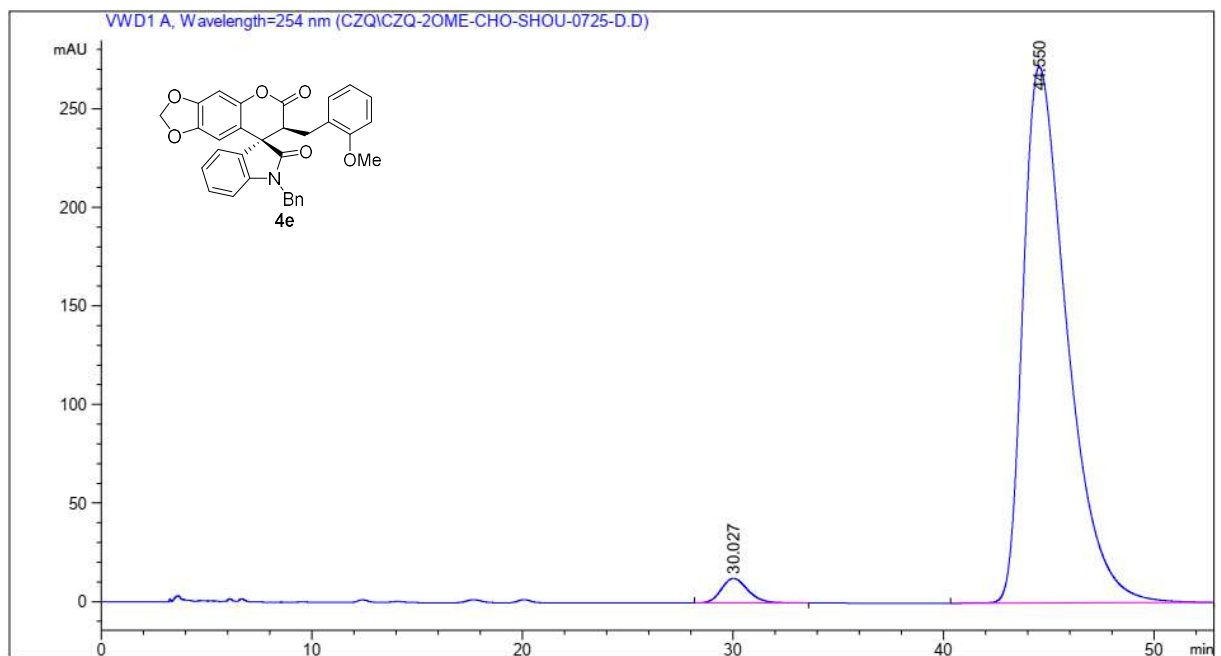

| Peak | Processed channel | Retention time (min) | Peak area (mAU*s) | Peak height (mAU) | Peak area (%) |
|------|-------------------|----------------------|-------------------|-------------------|---------------|
| 1    | PDA 254.0 nm      | 30.027               | 1095.84290        | 12.49169          | 2.7034        |
| 2    | PDA 254.0 nm      | 44.550               | 3.94400e4         | 271.91876         | 97.2966       |

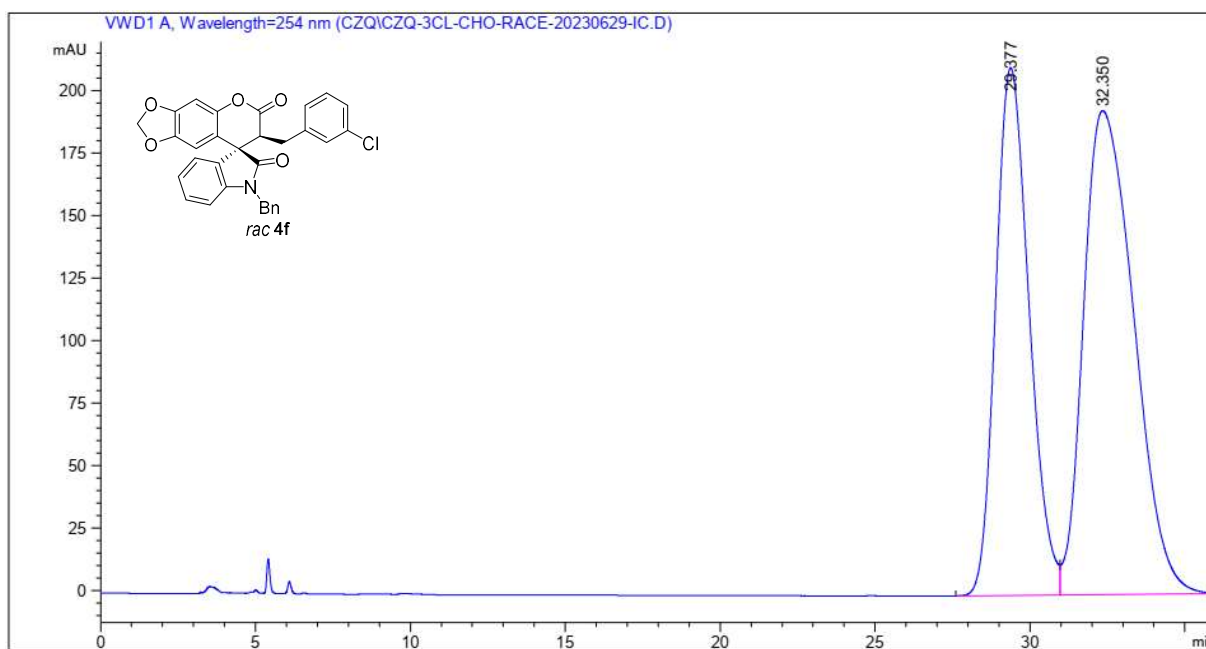

| Peak | Processed channel | Retention time (min) | Peak area (mAU*s) | Peak height (mAU) | Peak area (%) |
|------|-------------------|----------------------|-------------------|-------------------|---------------|
| 1    | PDA 254.0 nm      | 29.377               | 1.58795e4         | 210.96196         | 42.0888       |
| 2    | PDA 254.0 nm      | 32.350               | 2.18490e4         | 193.48170         | 57.9112       |

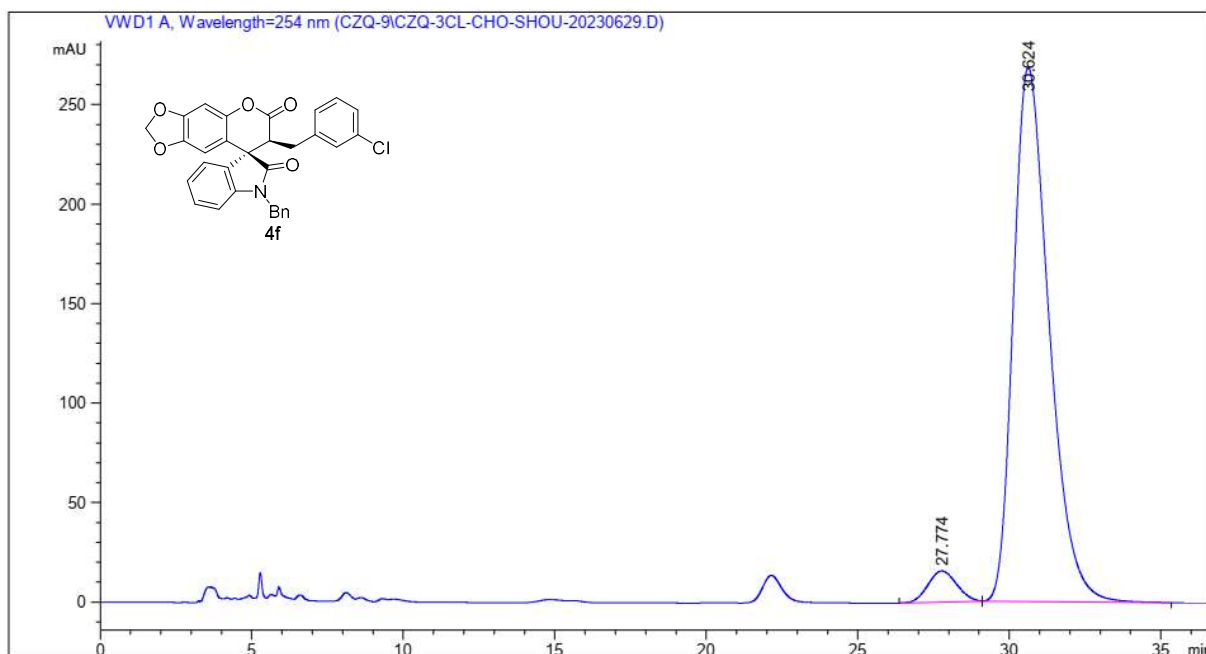

| Peak | Processed channel | Retention time (min) | Peak area (mAU*s) | Peak height (mAU) | Peak area (%) |
|------|-------------------|----------------------|-------------------|-------------------|---------------|
| 1    | PDA 254.0 nm      | 27.774               | 1018.62811        | 15.58698          | 4.4362        |
| 2    | PDA 254.0 nm      | 30.624               | 2.19431e4         | 268.25656         | 95.5638       |

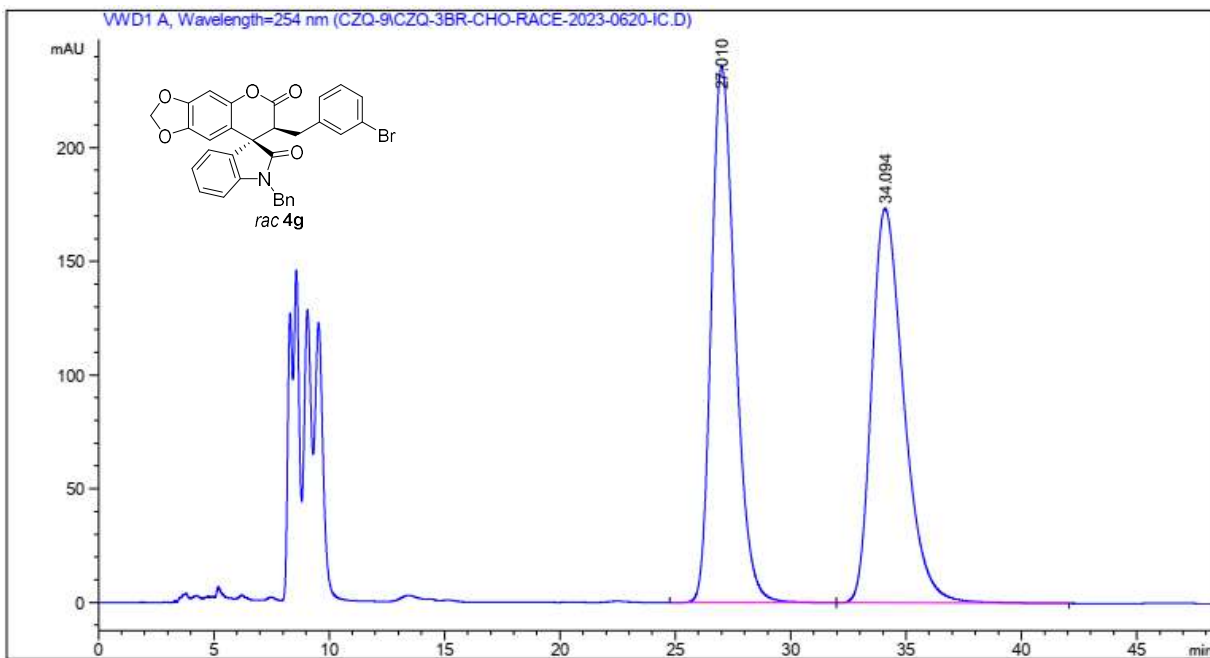

| Peak | Processed channel | Retention time (min) | Peak area (mAU*s) | Peak height (mAU) | Peak area (%) |
|------|-------------------|----------------------|-------------------|-------------------|---------------|
| 1    | PDA 254.0 nm      | 27.010               | 1.68724e4         | 235.97592         | 50.1227       |
| 2    | PDA 254.0 nm      | 34.094               | 1.67898e4         | 173.43828         | 49.8773       |

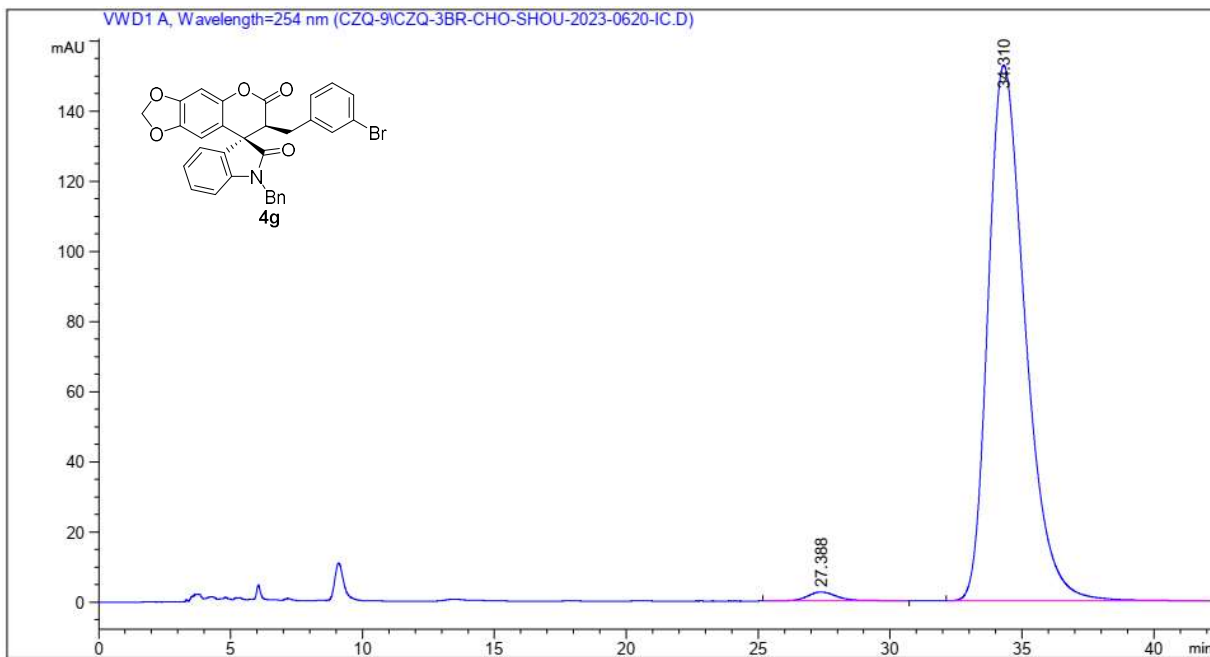

| Peak | Processed channel | Retention time (min) | Peak area (mAU*s) | Peak height (mAU) | Peak area (%) |
|------|-------------------|----------------------|-------------------|-------------------|---------------|
| 1    | PDA 254.0 nm      | 27.388               | 202.94321         | 2.54997           | 1.3406        |
| 2    | PDA 254.0 nm      | 34.310               | 1.49353e4         | 152.71385         | 98.6594       |

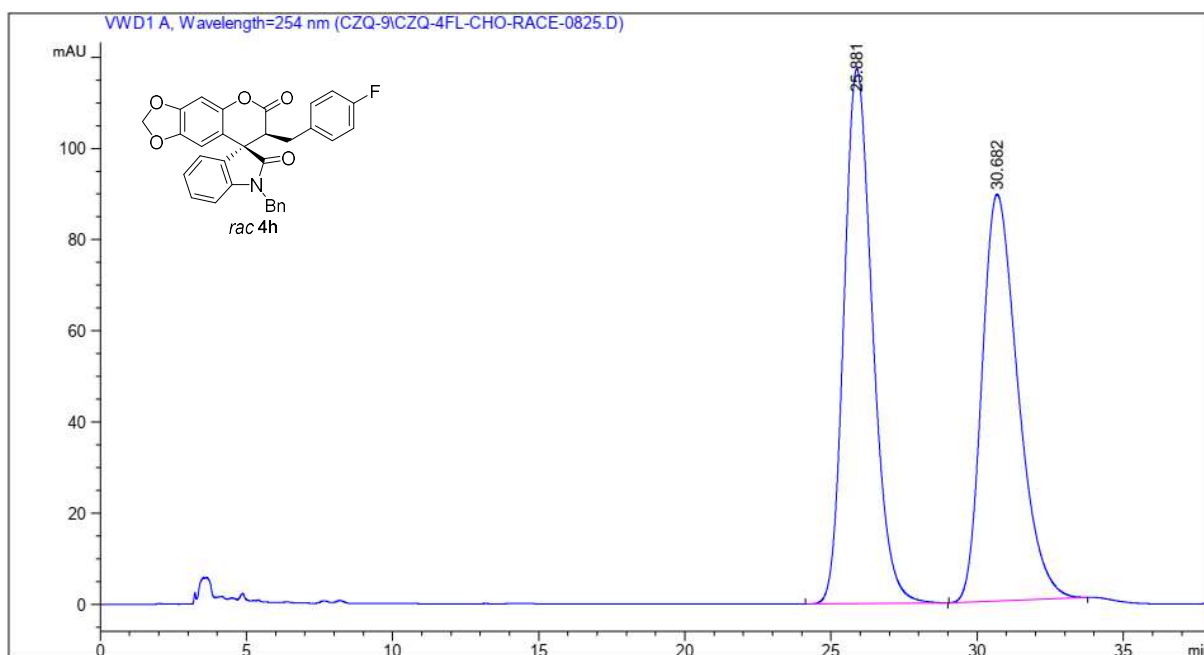

| Peak | Processed channel | Retention time (min) | Peak area (mAU*s) | Peak height (mAU) | Peak area (%) |
|------|-------------------|----------------------|-------------------|-------------------|---------------|
| 1    | PDA 254.0 nm      | 25.881               | 7935.60107        | 117.35586         | 51.0909       |
| 2    | PDA 254.0 nm      | 30.682               | 7596.71338        | 89.20211          | 48.9091       |

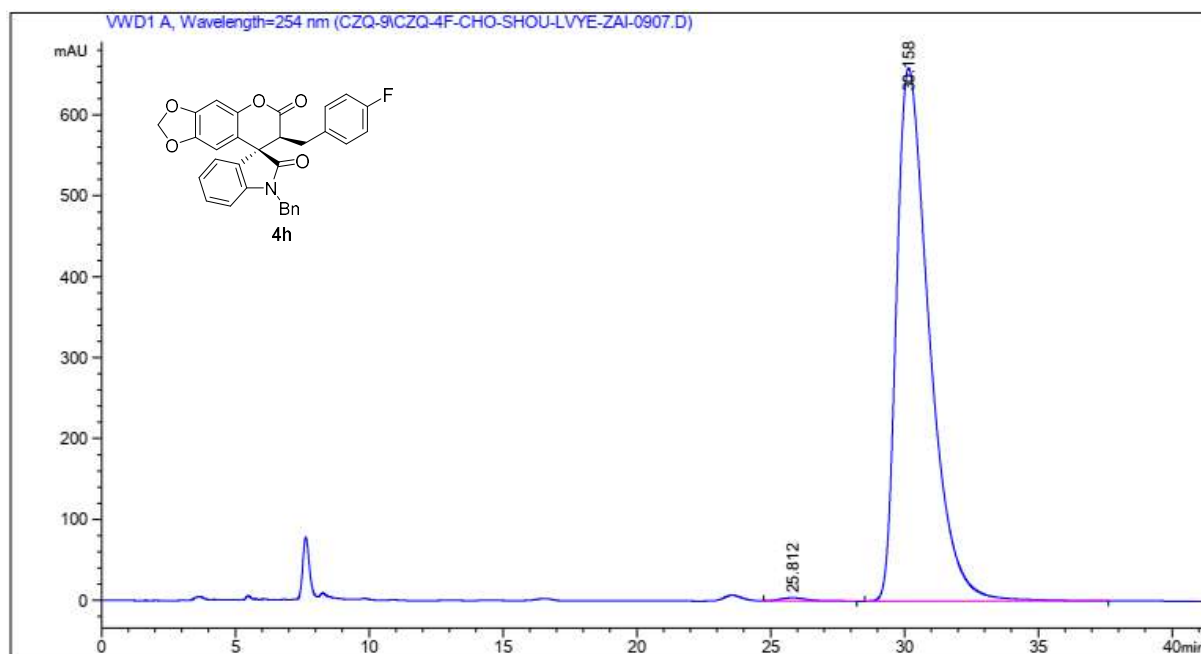

| Peak | Processed channel | Retention time (min) | Peak area (mAU*s) | Peak height (mAU) | Peak area (%) |
|------|-------------------|----------------------|-------------------|-------------------|---------------|
| 1    | PDA 254.0 nm      | 25.812               | 242.62831         | 3.86184           | 0.4322        |
| 2    | PDA 254.0 nm      | 30.158               | 5.58954e4         | 658.78931         | 99.5678       |

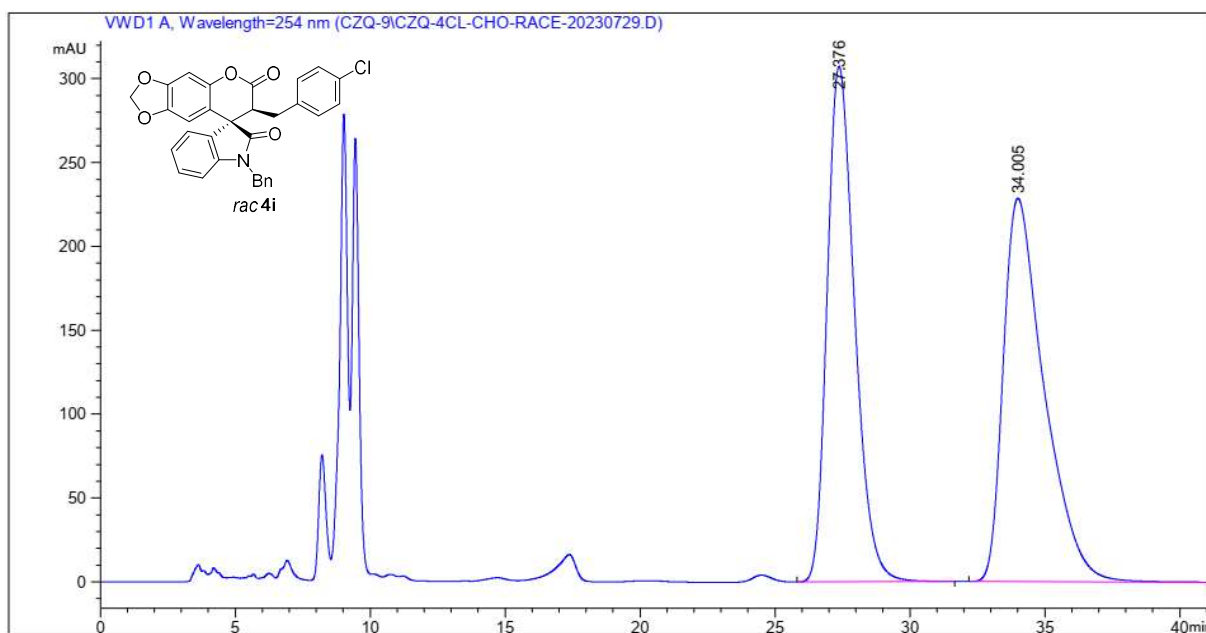

| Peak | Processed channel | Retention time (min) | Peak area (mAU*s) | Peak height (mAU) | Peak area (%) |
|------|-------------------|----------------------|-------------------|-------------------|---------------|
| 1    | PDA 254.0 nm      | 27.376               | 2.17413e4         | 307.34335         | 47.5057       |
| 2    | PDA 254.0 nm      | 34.005               | 2.40244e4         | 4228.61296        | 52.4943       |

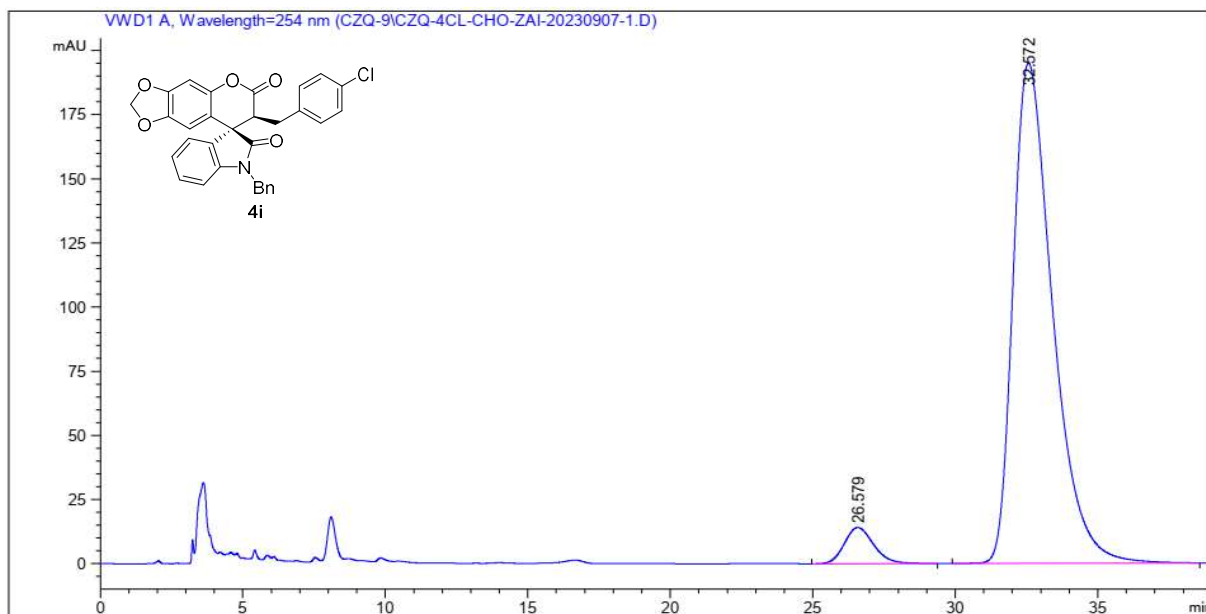

| Peak | Processed channel | Retention time (min) | Peak area (mAU*s) | Peak height (mAU) | Peak area (%) |
|------|-------------------|----------------------|-------------------|-------------------|---------------|
| 1    | PDA 254.0 nm      | 26.579               | 1012.61975        | 14.10623          | 5.1156        |
| 2    | PDA 254.0 nm      | 32.572               | 1.87822e4         | 195.06737         | 94.8844       |

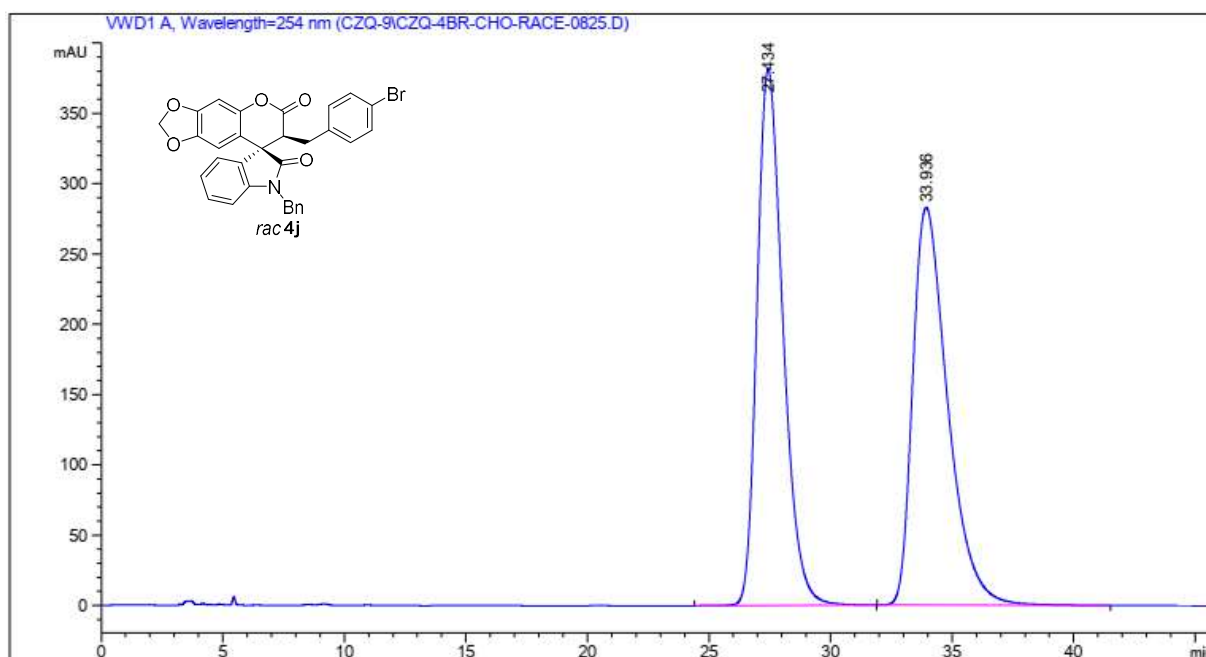

| Peak | Processed channel | Retention time (min) | Peak area (mAU*s) | Peak height (mAU) | Peak area (%) |
|------|-------------------|----------------------|-------------------|-------------------|---------------|
| 1    | PDA 254.0 nm      | 27.434               | 2.82793e4         | 381.24344         | 49.9951       |
| 2    | PDA 254.0 nm      | 33.936               | 2.82849e4         | 282.93646         | 50.0049       |

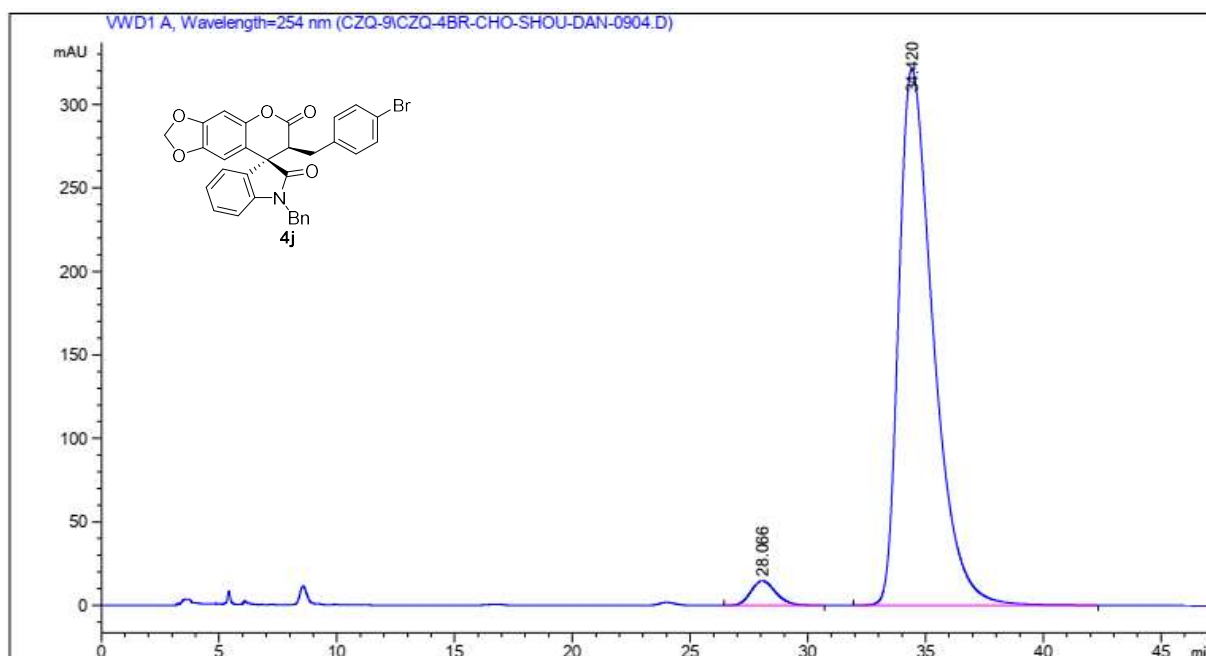

| Peak | Processed channel | Retention time (min) | Peak area (mAU*s) | Peak height (mAU) | Peak area (%) |
|------|-------------------|----------------------|-------------------|-------------------|---------------|
| 1    | PDA 254.0 nm      | 28.066               | 1100.61108        | 14.80378          | 3.2587        |
| 2    | PDA 254.0 nm      | 34.420               | 3.26741e4         | 321.30475         | 96.7413       |

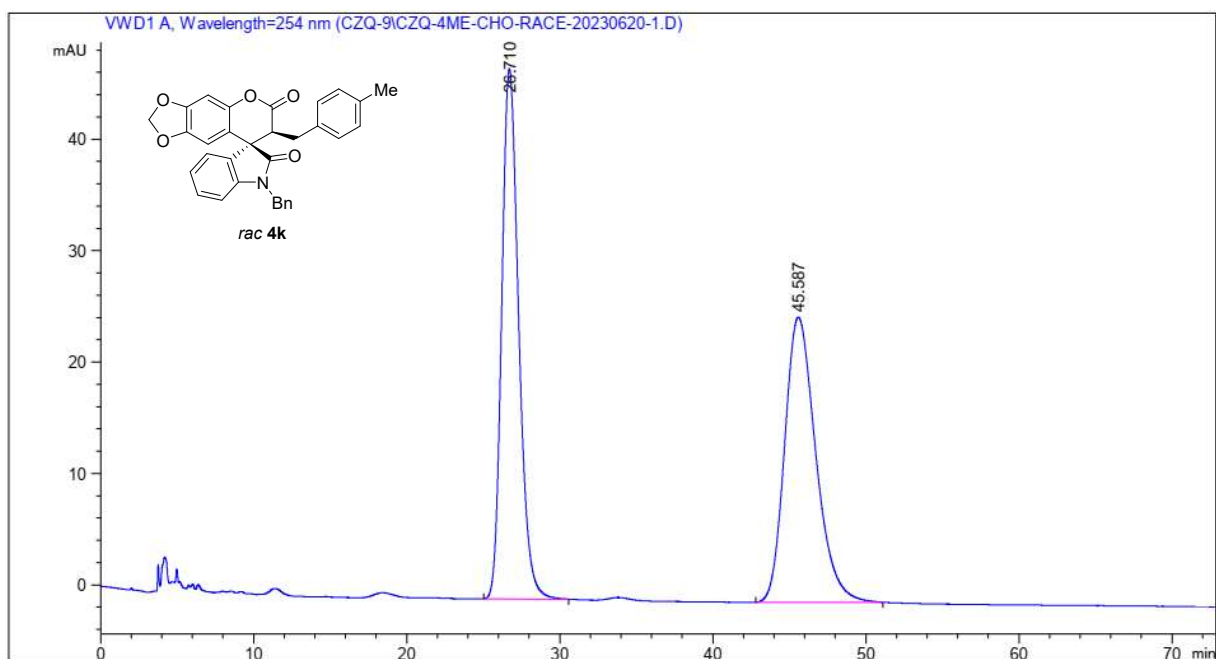

| Peak | Processed channel | Retention time (min) | Peak area (mAU*s) | Peak height (mAU) | Peak area (%) |
|------|-------------------|----------------------|-------------------|-------------------|---------------|
| 1    | PDA 254.0 nm      | 26.710               | 3656.90894        | 47.58177          | 50.3261       |
| 2    | PDA 254.0 nm      | 45.587               | 3609.52441        | 25.59332          | 49.6739       |

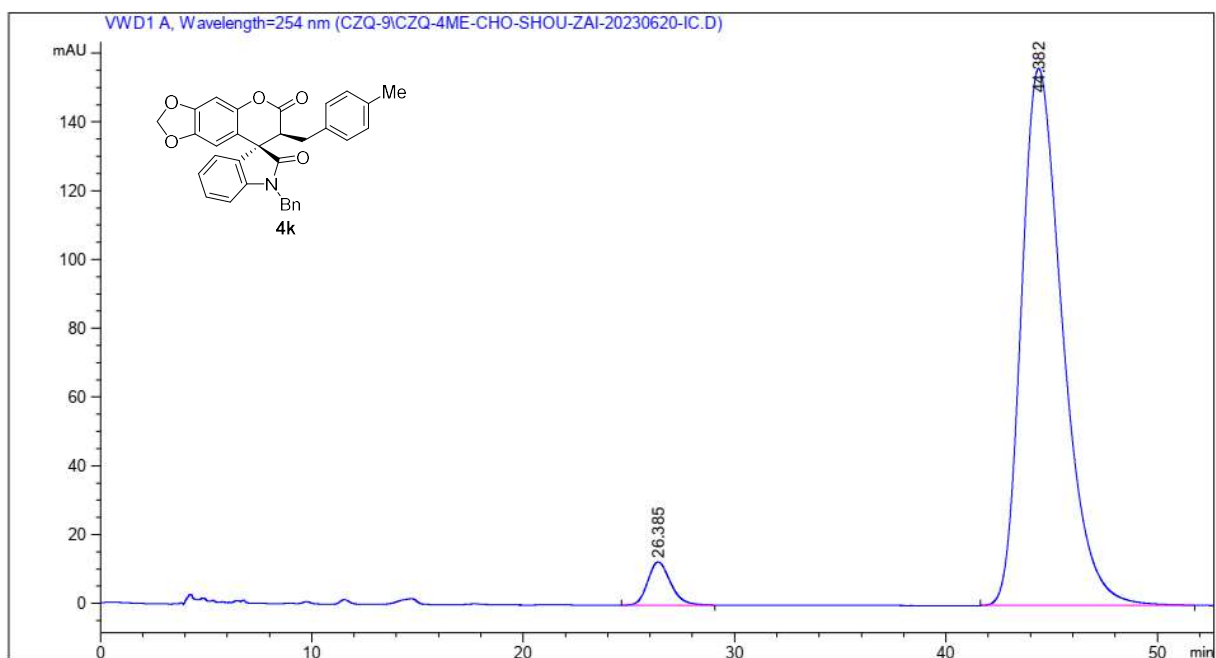

| Peak | Processed channel | Retention time (min) | Peak area (mAU*s) | Peak height (mAU) | Peak area (%) |
|------|-------------------|----------------------|-------------------|-------------------|---------------|
| 1    | PDA 254.0 nm      | 26.385               | 942.30835         | 12.58103          | 4.2714        |
| 2    | PDA 254.0 nm      | 44.382               | 2.11186e4         | 156.14299         | 95.7286       |

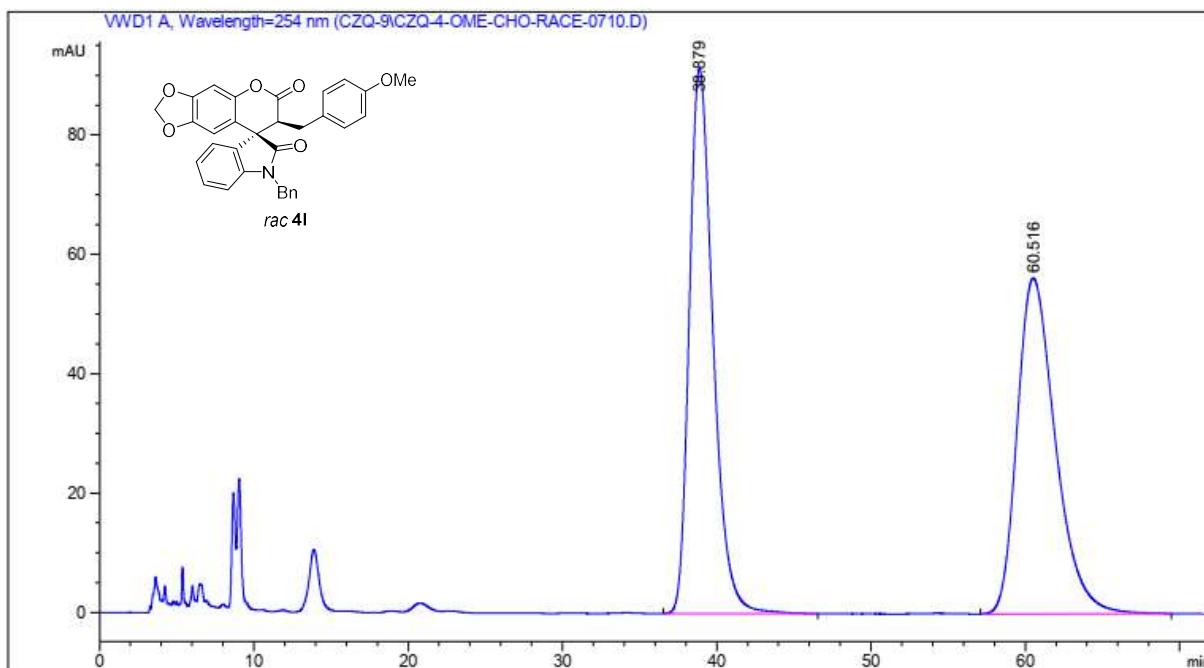

| Peak | Processed channel | Retention time (min) | Peak area (mAU*s) | Peak height (mAU) | Peak area (%) |
|------|-------------------|----------------------|-------------------|-------------------|---------------|
| 1    | PDA 254.0 nm      | 38.879               | 9742.93945        | 91.34114          | 50.1668       |
| 2    | PDA 254.0 nm      | 60.516               | 9678.14453        | 56.24915          | 49.8332       |

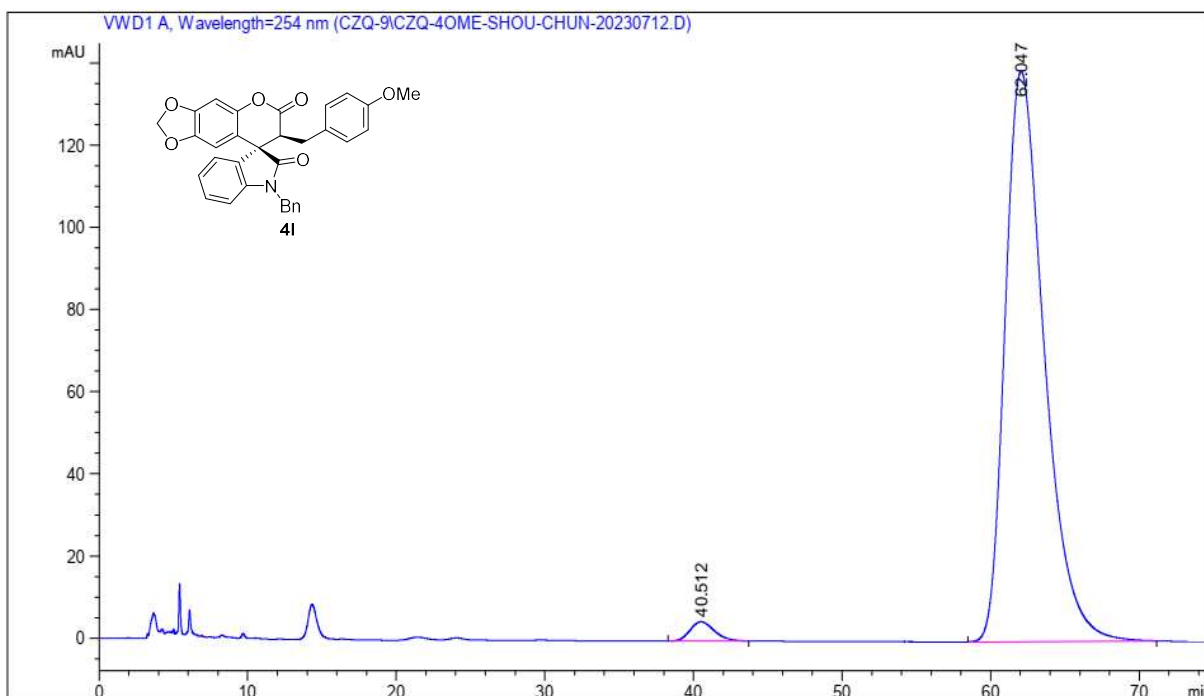

| Peak | Processed channel | Retention time (min) | Peak area (mAU*s) | Peak height (mAU) | Peak area (%) |
|------|-------------------|----------------------|-------------------|-------------------|---------------|
| 1    | PDA 254.0 nm      | 40.512               | 537.72357         | 4.71128           | 2.0757        |
| 2    | PDA 254.0 nm      | 62.047               | 2.53681e4         | 138.86932         | 97.9243       |



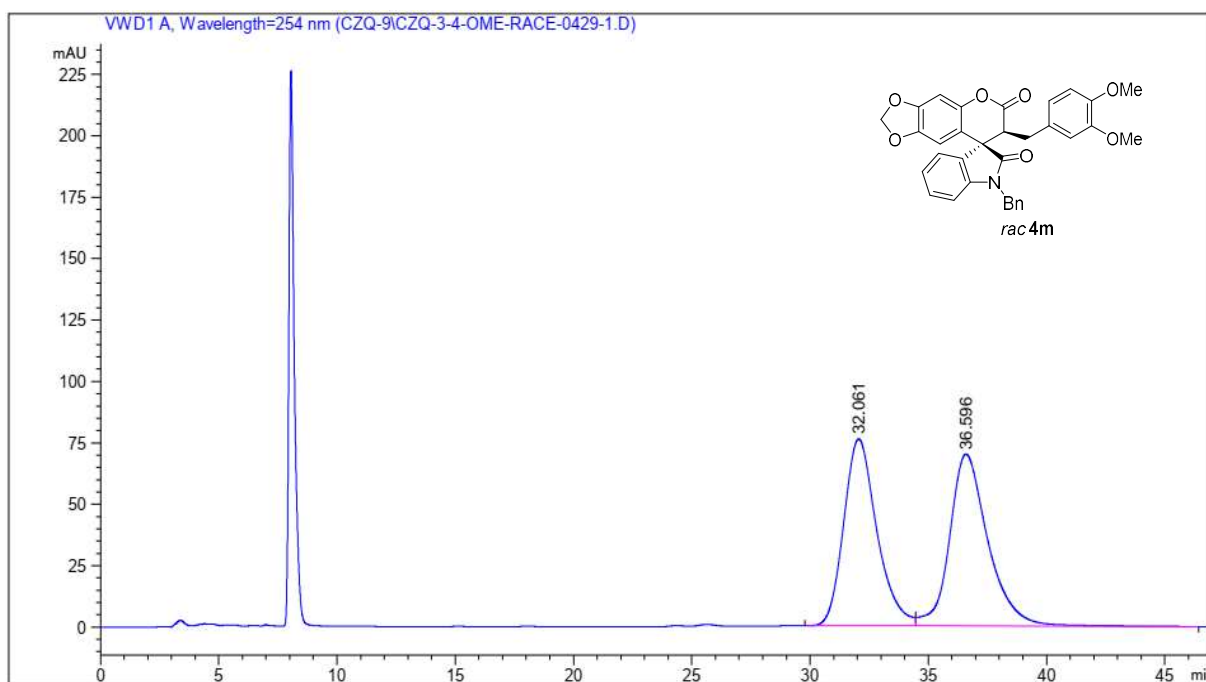

| Peak | Processed channel | Retention time (min) | Peak area (mAU*s) | Peak height (mAU) | Peak area (%) |
|------|-------------------|----------------------|-------------------|-------------------|---------------|
| 1    | PDA 254.0 nm      | 32.061               | 7400.74072        | 76.05070          | 48.2116       |
| 2    | PDA 254.0 nm      | 36.596               | 7949.80322        | 69.95824          | 51.7884       |

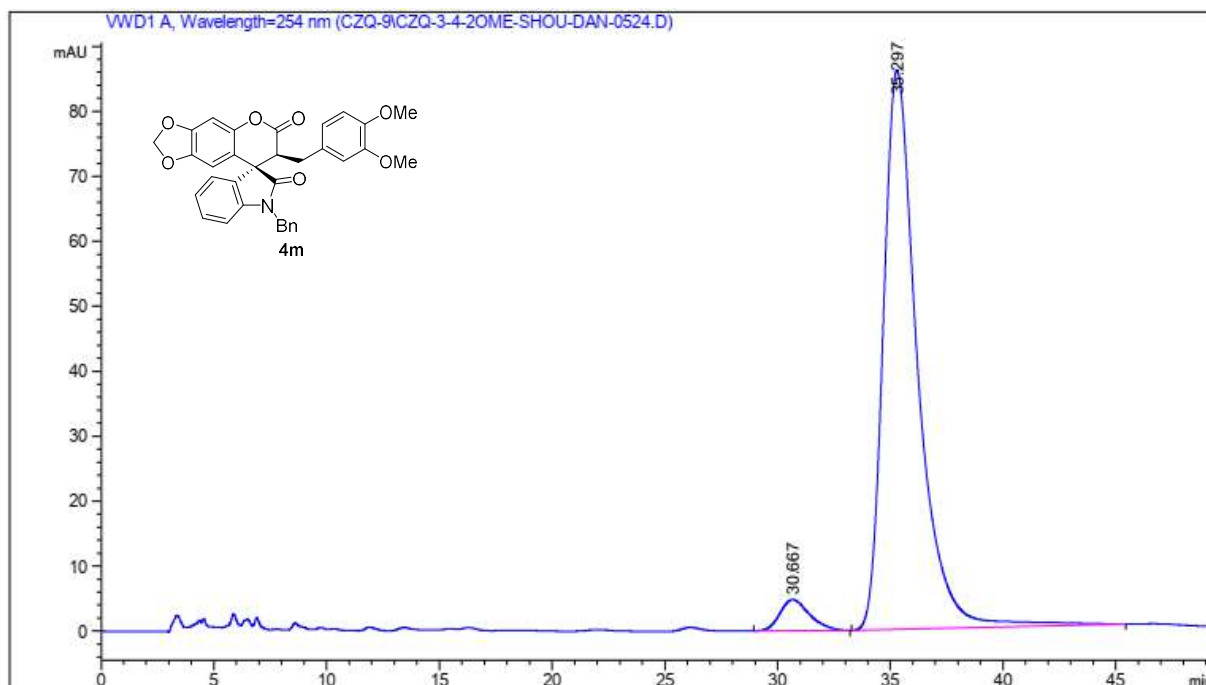

| Peak | Processed channel | Retention time (min) | Peak area (mAU*s) | Peak height (mAU) | Peak area (%) |
|------|-------------------|----------------------|-------------------|-------------------|---------------|
| 1    | PDA 254.0 nm      | 30.667               | 437.60999         | 4.80110           | 4.5805        |
| 2    | PDA 254.0 nm      | 35.297               | 9116.13965        | 86.10291          | 95.4195       |

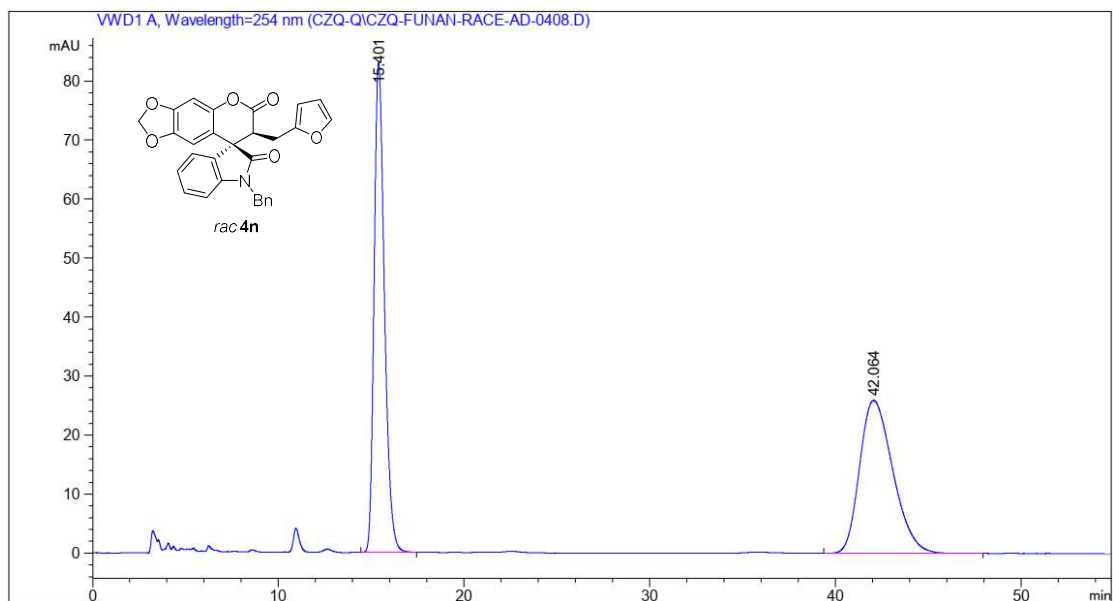

| Peak | Processed channel | Retention time (min) | Peak area (mAU*s) | Peak height (mAU) | Peak area (%) |
|------|-------------------|----------------------|-------------------|-------------------|---------------|
| 1    | PDA 254.0 nm      | 15.401               | 3211.52612        | 83.02571          | 49.9190       |
| 2    | PDA 254.0 nm      | 42.064               | 3221.94287        | 25.90264          | 50.0810       |

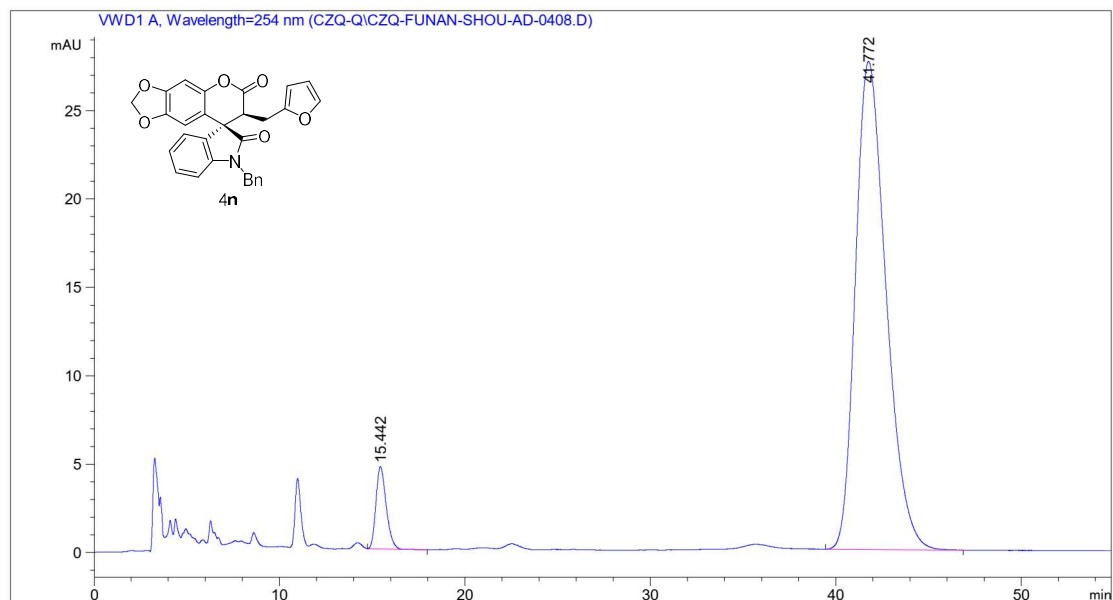

| Peak | Processed channel | Retention time (min) | Peak area (mAU*s) | Peak height (mAU) | Peak area (%) |
|------|-------------------|----------------------|-------------------|-------------------|---------------|
| 1    | PDA 254.0 nm      | 15.442               | 181.37396         | 4.66625           | 5.4193        |
| 2    | PDA 254.0 nm      | 41.772               | 3165.43530        | 27.59027          | 94.5807       |

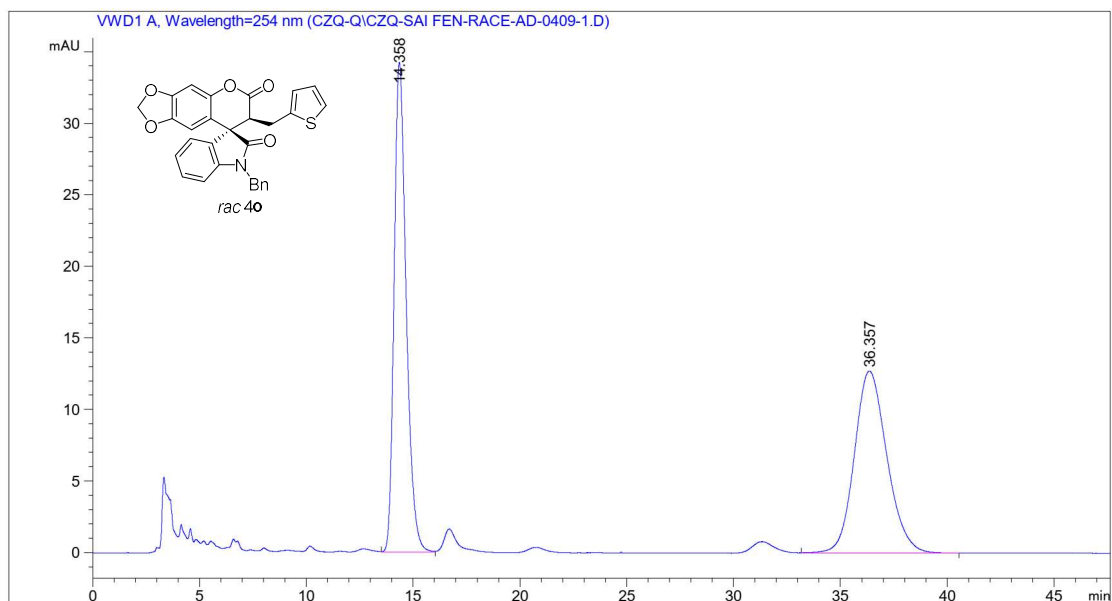

| Peak | Processed channel | Retention time (min) | Peak area (mAU*s) | Peak height (mAU) | Peak area (%) |
|------|-------------------|----------------------|-------------------|-------------------|---------------|
| 1    | PDA 254.0 nm      | 14.358               | 1344.13879        | 34.23613          | 49.9944       |
| 2    | PDA 254.0 nm      | 36.357               | 1344.44214        | 12.71589          | 50.0056       |

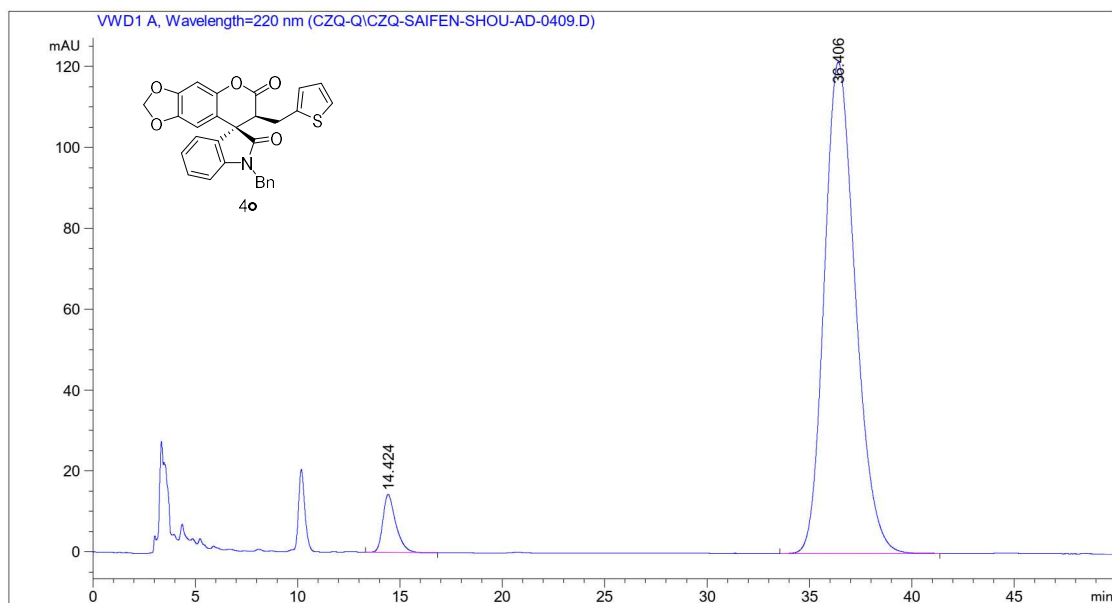

| Peak | Processed channel | Retention time (min) | Peak area (mAU*s) | Peak height (mAU) | Peak area (%) |
|------|-------------------|----------------------|-------------------|-------------------|---------------|
| 1    | PDA 254.0 nm      | 14.424               | 629.46582         | 14.34530          | 4.6839        |
| 2    | PDA 254.0 nm      | 36.406               | 1.28095e4         | 121.45863         | 95.3161       |

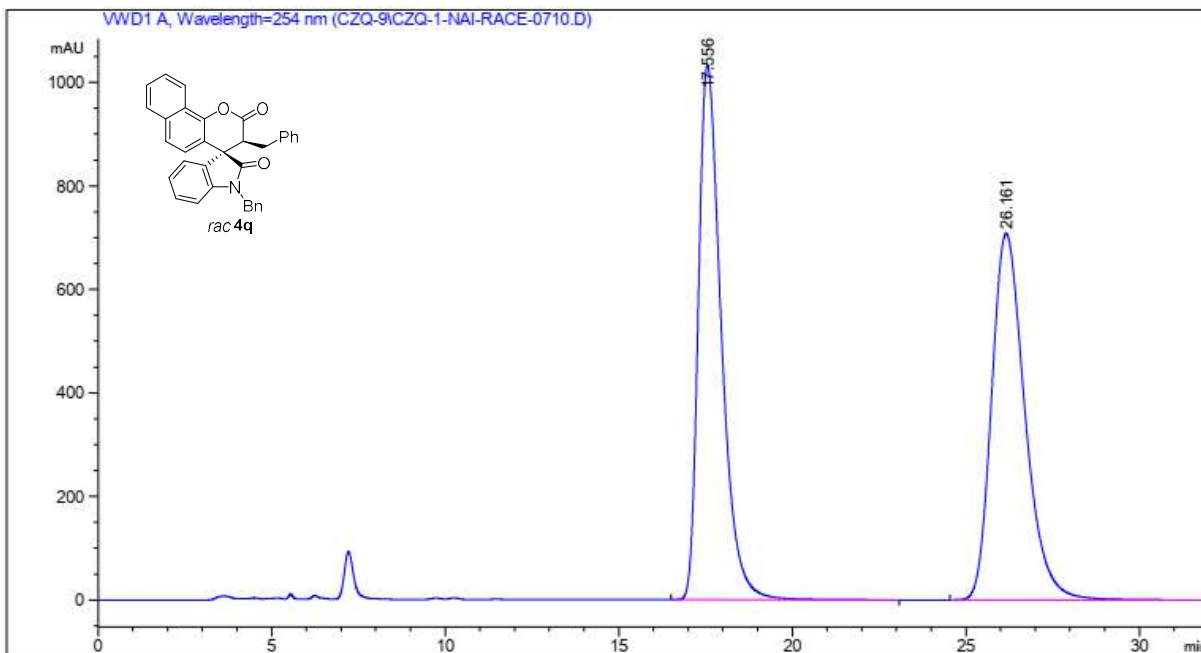

| Peak | Processed channel | Retention time (min) | Peak area (mAU*s) | Peak height (mAU) | Peak area (%) |
|------|-------------------|----------------------|-------------------|-------------------|---------------|
| 1    | PDA 254.0 nm      | 19.585               | 3.48033e4         | 790.32184         | 53.0628       |
| 2    | PDA 254.0 nm      | 26.238               | 3.07856e4         | 507.30722         | 46.9372       |

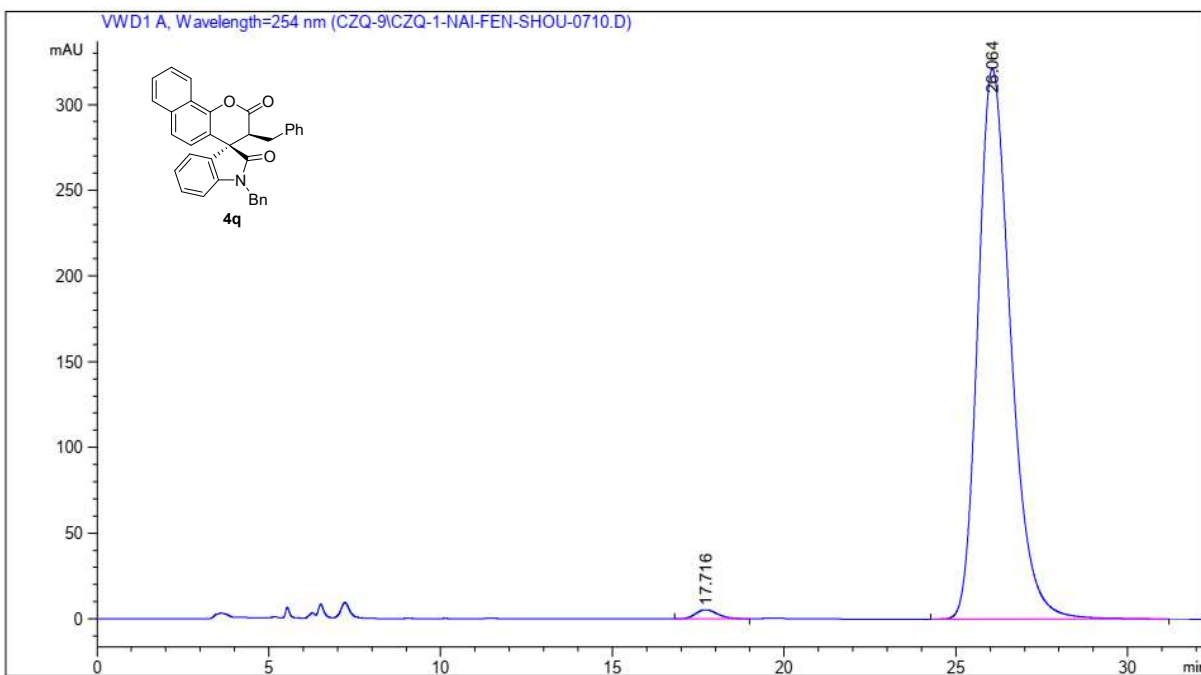

| Peak | Processed channel | Retention time (min) | Peak area (mAU*s) | Peak height (mAU) | Peak area (%) |
|------|-------------------|----------------------|-------------------|-------------------|---------------|
| 1    | PDA 254.0 nm      | 17.716               | 239.68336         | 5.38165           | 1.1145        |
| 2    | PDA 254.0 nm      | 26.064               | 2.12658e4         | 321.20316         | 98.8855       |

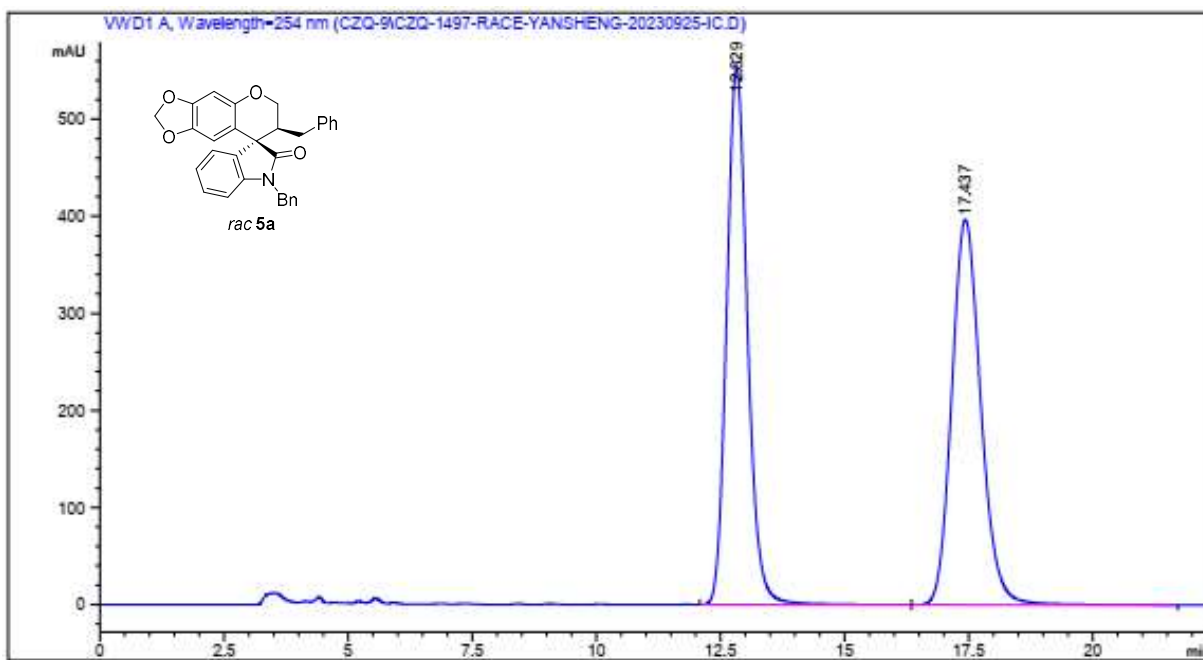

| Peak | Processed channel | Retention time (min) | Peak area (mAU*s) | Peak height (mAU) | Peak area (%) |
|------|-------------------|----------------------|-------------------|-------------------|---------------|
| 1    | PDA 254.0 nm      | 12.829               | 1.61482e4         | 552.68109         | 49.9856       |
| 2    | PDA 254.0 nm      | 17.437               | 1.61575e4         | 396.92844         | 50.0144       |

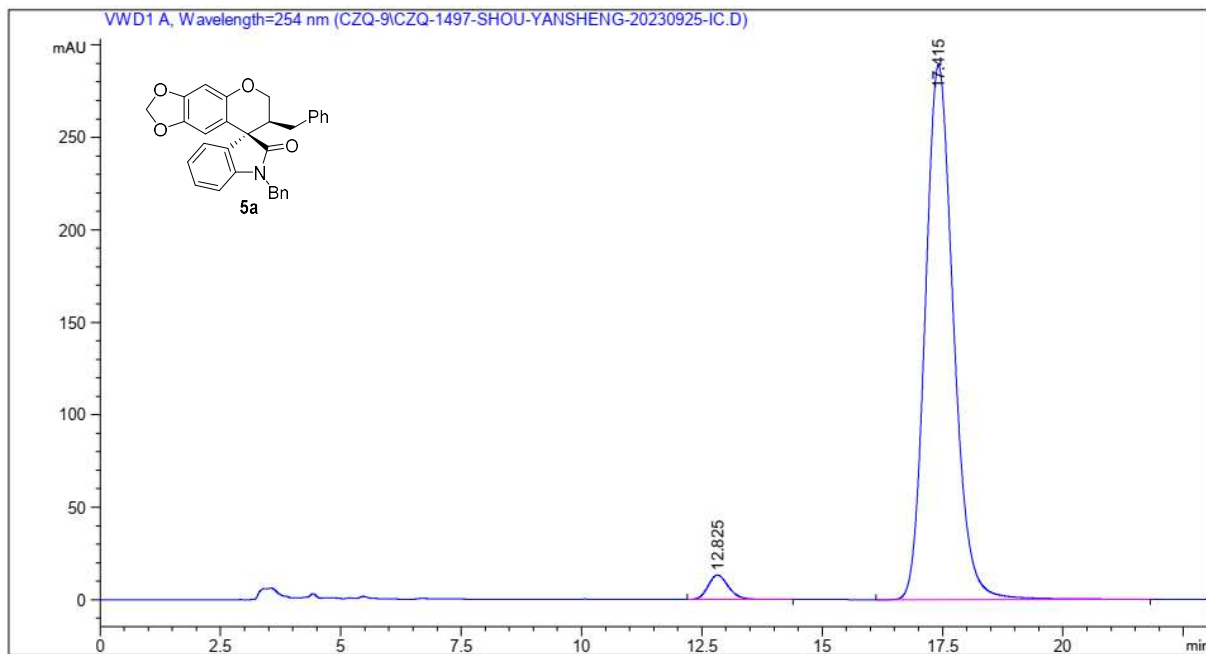

| Peak | Processed channel | Retention time (min) | Peak area (mAU*s) | Peak height (mAU) | Peak area (%) |
|------|-------------------|----------------------|-------------------|-------------------|---------------|
| 1    | PDA 254.0 nm      | 12.825               | 388.83307         | 13.15648          | 3.2032        |
| 2    | PDA 254.0 nm      | 17.415               | 1.17502e4         | 288.99985         | 96.7968       |

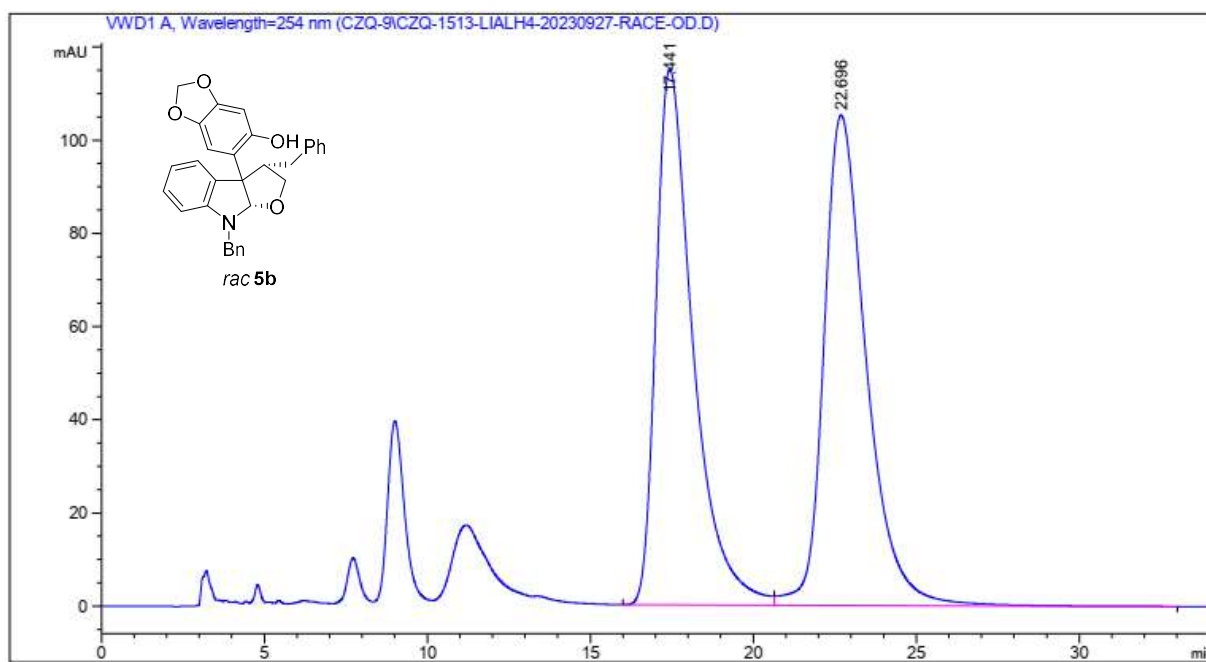

| Peak | Processed channel | Retention time (min) | Peak area (mAU*s) | Peak height (mAU) | Peak area (%) |
|------|-------------------|----------------------|-------------------|-------------------|---------------|
| 1    | PDA 254.0 nm      | 17.441               | 9095.26465        | 114.96246         | 48.8206       |
| 2    | PDA 254.0 nm      | 22.696               | 9534.71875        | 105.25622         | 51.1794       |

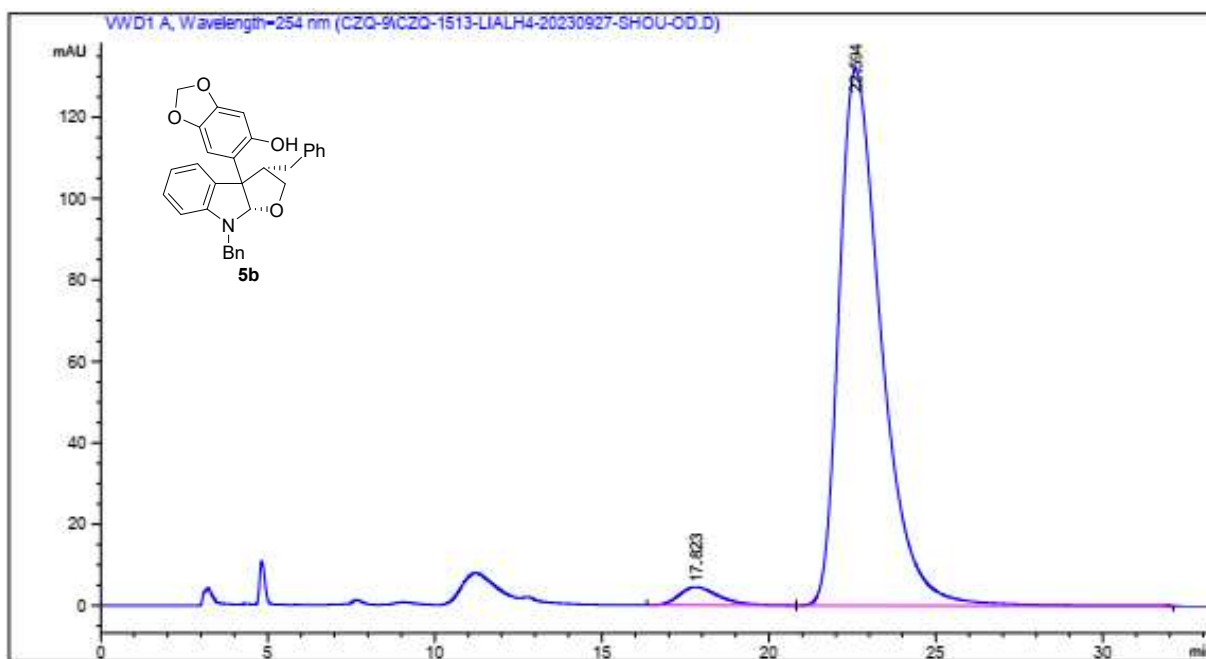

| Peak | Processed channel | Retention time (min) | Peak area (mAU*s) | Peak height (mAU) | Peak area (%) |
|------|-------------------|----------------------|-------------------|-------------------|---------------|
| 1    | PDA 254.0 nm      | 17.823               | 371.74213         | 4.45950           | 3.1177        |
| 2    | PDA 254.0 nm      | 22.594               | 1.15517e4         | 131.73196         | 96.8823       |

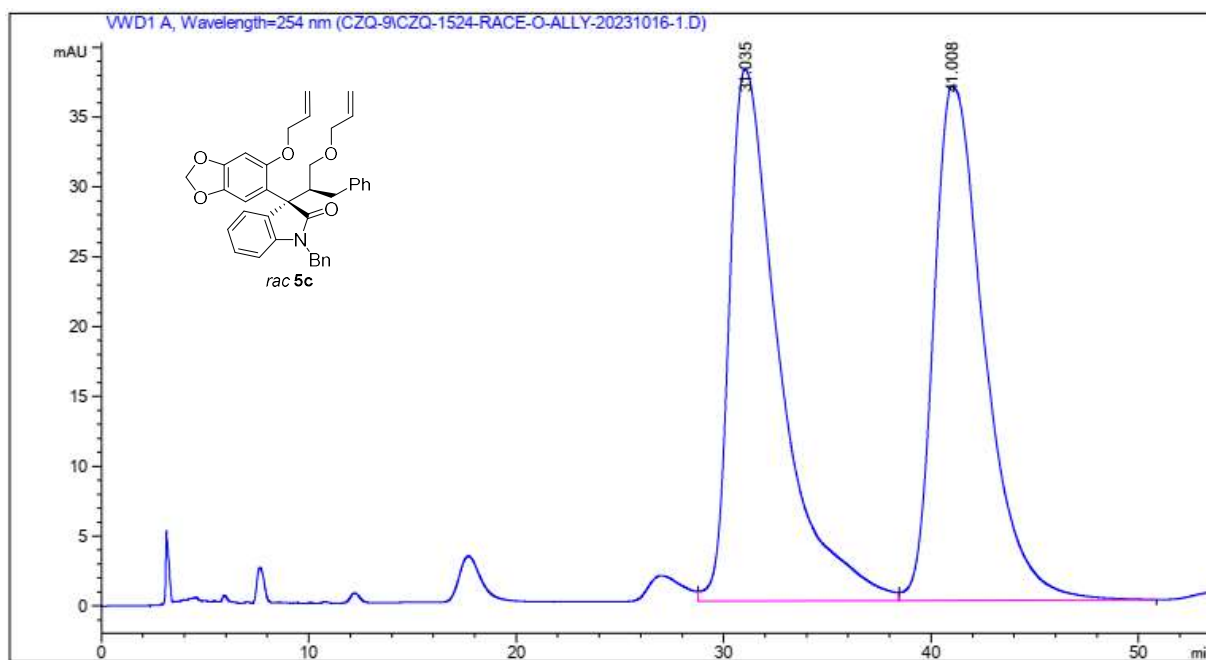

| Peak | Processed channel | Retention time (min) | Peak area (mAU*s) | Peak height (mAU) | Peak area (%) |
|------|-------------------|----------------------|-------------------|-------------------|---------------|
| 1    | PDA 254.0 nm      | 31.035               | 6360.46777        | 38.10089          | 50.4903       |
| 2    | PDA 254.0 nm      | 41.008               | 6236.92627        | 36.80893          | 49.5097       |

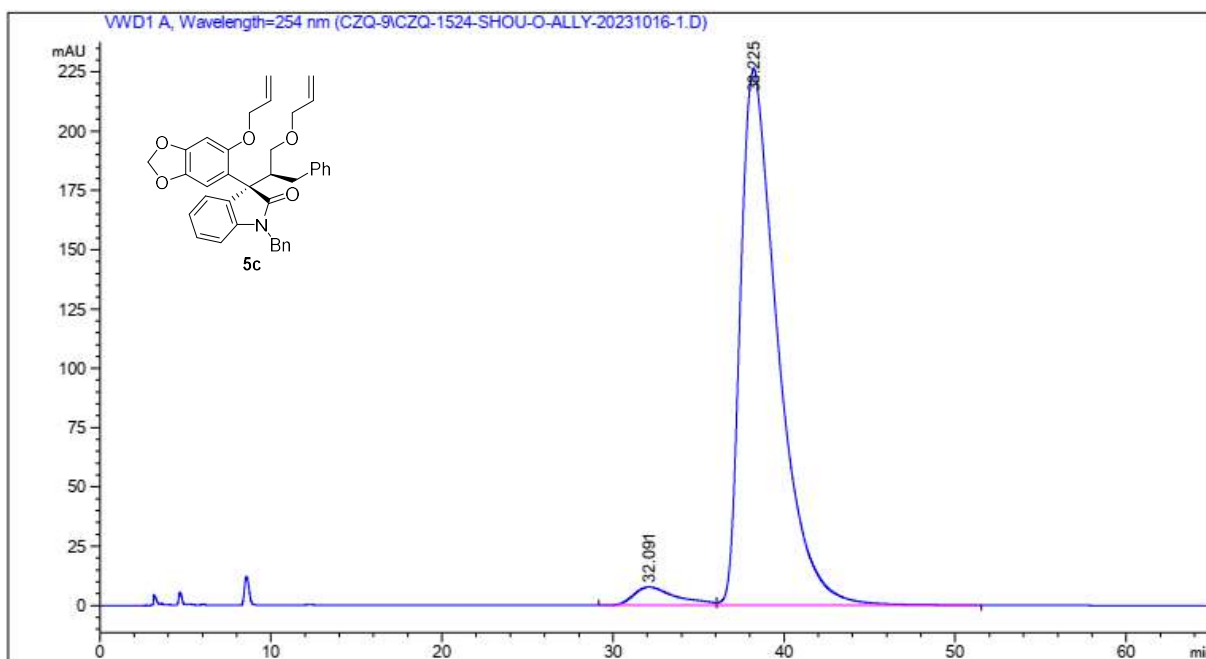

| Peak | Processed channel | Retention time (min) | Peak area (mAU*s) | Peak height (mAU) | Peak area (%) |
|------|-------------------|----------------------|-------------------|-------------------|---------------|
| 1    | PDA 254.0 nm      | 32.091               | 1348.17419        | 7.71993           | 3.7966        |
| 2    | PDA 254.0 nm      | 38.225               | 3.41620e4         | 226.38808         | 96.2034       |

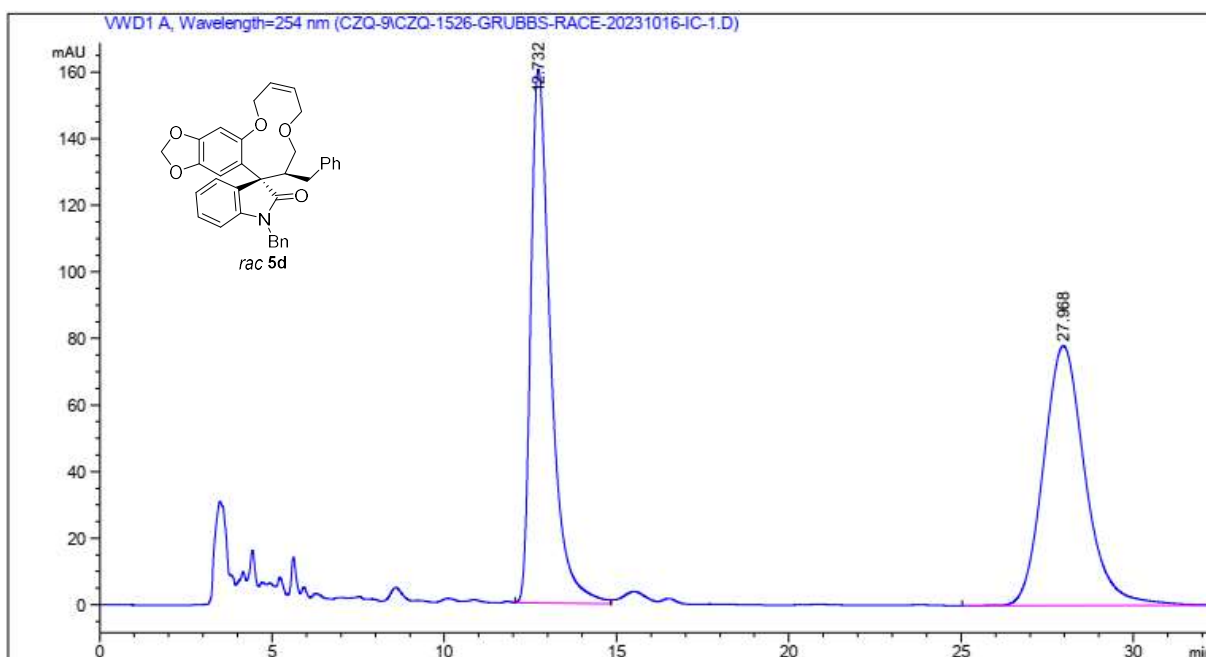

| Peak | Processed channel | Retention time (min) | Peak area (mAU*s) | Peak height (mAU) | Peak area (%) |
|------|-------------------|----------------------|-------------------|-------------------|---------------|
| 1    | PDA 254.0 nm      | 12.732               | 6404.42969        | 160.30928         | 49.5372       |
| 2    | PDA 254.0 nm      | 27.968               | 6524.09717        | 78.02768          | 50.4628       |

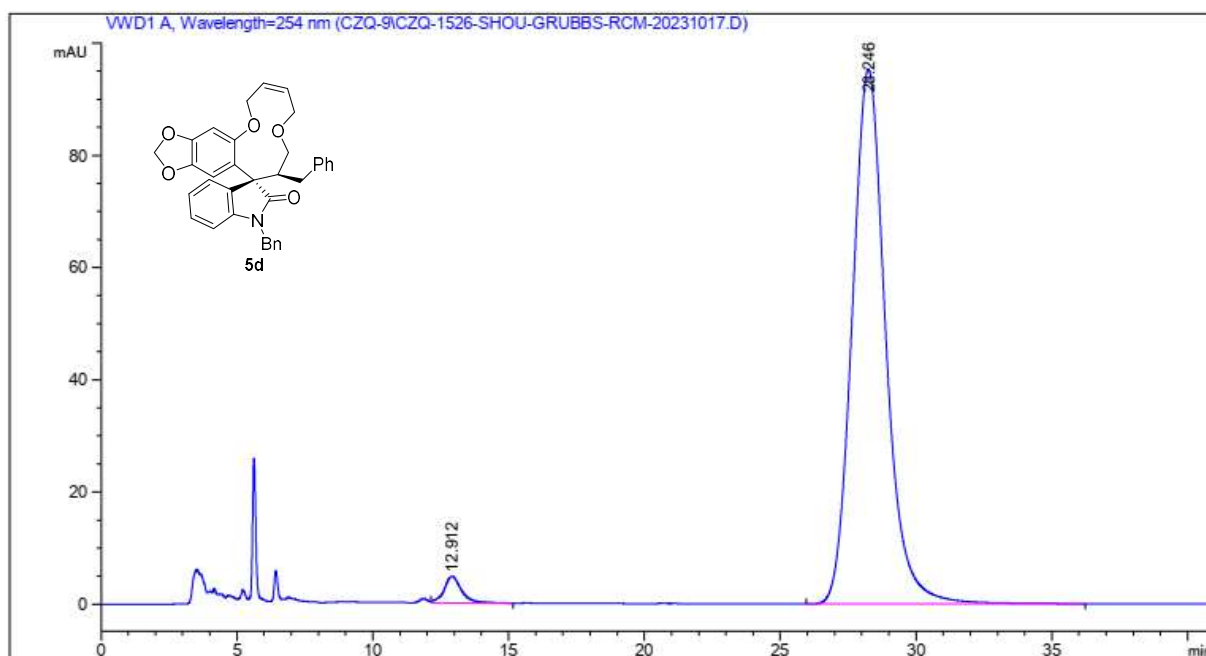

| Peak | Processed channel | Retention time (min) | Peak area (mAU*s) | Peak height (mAU) | Peak area (%) |
|------|-------------------|----------------------|-------------------|-------------------|---------------|
| 1    | PDA 254.0 nm      | 12.912               | 212.58983         | 4.75658           | 2.5417        |
| 2    | PDA 254.0 nm      | 28.246               | 8151.43896        | 95.30463          | 97.4583       |
